# Supplementary material
Source: PubMed Central journal article supplement (PMC3059556)
Supplement: NIHMS240934-supplement-2.pdf [file NIHMS240934-supplement-2.pdf]

Molecular control of axonal sprouting after stroke: an age-related sprouting transcriptome in cortical neurons. Li S, Overman JJ, Katsman D, Koslov SV, Connolly CJ, Twiss JL, Giger RJ, Coppola G, Geschwind DH, Carmichael ST.

## **Supplementary Discussion**

### **Methodology of cell labeling for gene expression profiling**

To label neurons that sprout a new cortical connection after stroke we modified a technique originally developed to study the intracortical connections in development<sup>15,16</sup>. This approach utilizes the same tracer, cholera toxin b subunit (CTb), but conjugated to different fluorophores, to label and then serve as the targeting signal for laser capture microdissection of sprouting neurons. An advantage of this approach is that it provides a close molecular control for microarray comparison: neurons that have formed a new connection after stroke are compared to adjacent cortical neurons that are from the same animal, same brain region and have been exposed to the same stroke, but have not elaborated a new projection within the forelimb cortex injection site. This allows subtraction of genes that may be generally induced by stroke (heat shock or cell stress response elements) or serve a functional role in specific cortical or laminar neuronal subtypes<sup>17-19</sup>. This technique labels the same number of total cells in all cases, so that there is no difference in tracer uptake or labeling by stroke or age (Supplementary Fig. 13). For laser capture microdissection in each case 300 or more cells were laser captured from each animal in each category.

Laser capture microdissection cannot isolate exactly the labeled cell, and invariably captures small amounts of tissue adjacent to the cell body (Fig. 1), likely relating to astrocyte or microglial cells that also respond to stroke and border neurons. However, this has turned out to be an advantage in that major differences in the gene expression profile of axonal sprouting between young and aged adult relate to cytokine or chemokine gene systems that likely indicate a distinction in the inflammatory process around sprouting neurons as a function of age (Table 2). The CTb tracers were injected into rat forelimb sensorimotor cortex. This area was selected because it is in the peri-infarct region bordering the stroke, but is sufficiently separated from the stroke so that the tracer would not be injected into the infarct cavity. This peri-infarct region is in a distance from the stroke site that corresponds to a location of increased axonal growth cone proteins after stroke<sup>20,21</sup> and in a direct demonstration of post-stroke axonal sprouting in rodents<sup>22</sup> and where axonal sprouting is observed in the nature of axonal trajectories in primates<sup>23</sup>.

In these studies, rats were used for the sequential tracer injection to label sprouting neurons for laser capture microdissection, and then mice were used for the mechanistic studies on ATRX, IGF1 and Lingo1/NgR1 in axonal sprouting. This is because the larger brain size of the rat facilitates the precise injection approach of the paired CTb injections, in which the second injection, CTb-647, must be placed exactly within the first injection (CTb-488), at 2/3 the volume (Fig. 1). However, the studies to use gain and loss of function to determine the mechanistic roles of specific genes in post-stroke axonal sprouting took advantage of transgenic lines that are not available in rats.

Sprouting neurons activate a unique sprouting transcriptome that includes both novel and established growth-associated genes. Most of the transcriptional change after stroke occurs early in the sprouting process. We chose day 7 as an early time point in the process of post-stroke axonal sprouting based on earlier work in stroke studies<sup>24</sup> and based on the time course of axonal sprouting in entorhinal cortex, in retinal ganglion cells and in the peripheral nervous system after injury<sup>25-27</sup>.

### **Molecular pathway analysis and aged sprouting transcriptome**

The differentially regulated genes at  $p < 0.005$  and expression change  $> \pm 0.2$  (log2) for aged and young adult sprouting neurons were analyzed for molecular relationships using a large curated database (Ingenuity). This analysis identifies several key signaling cascades that are active in sprouting neurons and are distinct in young vs. aged adult. The transcriptional profile of axonal sprouting activates large networks of interconnected molecules that form signaling systems from cell surface receptors to nuclear transcription factors (Supplementary Fig. 2). Young adult sprouting neurons activate a signaling network that progresses from NGF to Jnk and Stat1 activation, and involves PPAR $\gamma$  nuclear signaling. PDGF $\alpha$  is also induced in or near young adult sprouting neurons and is linked to a molecular sprouting pathway that involves APP, MAPK and GSK3b signaling (Supplementary Fig. 2). Stroke downregulates FGF and TGF $\beta$  signaling and this is linked to signaling pathways through APP, Ras and RhoA/Rac to the transcription factors ATF2, RPA1 and Egr2 and activation of an NF $\kappa$ -B inhibitor. Similar genes are also differentially expressed in growth cones, by proteomic screening<sup>28</sup>. In contrast, genes regulated in aged sprouting neurons at day 7 form pathways that involve osteopontin, IGF1 and BMP signaling and downregulation of Pou1F1; and that link chemokine signaling to Jak1 induction and Egr1

downregulation (Table 1, Supplementary Fig. 2). Post-stroke sprouting neurons from aged animals differentially upregulate the bone morphogenic proteins BMP1, GDF10 and the BMP-associated transcription factor ONECUT2. Several BMPs promote dendritic sprouting, provide a target-derived signal to strengthen synaptic connections and signal through a SMAD-independent mechanism to promote axonal extension<sup>29,30</sup>. Most of these data relate to the effect of BMPs 2 and 7 on neuronal function with little data is available on the molecules differentially upregulated in aged sprouting neurons, or on the age-related changes in BMP signaling in the brain. These are the first data to report changes in BMP signaling systems with age and associated with cortical plasticity.

If the gene sets that are regulated in young adult sprouting neurons, but not aged; and aged sprouting neurons but not young adult, are analyzed for molecular pathways that are distinct to the sprouting response in each age group, young adult neurons distinctly activate molecular pathways that have as a node at APP, PDGF and MAPK signaling. In contrast, aged sprouting neurons activate pathways related to IGF1, osteopontin and chemokine signaling (CCL3, CCL4, CXCL2) (Supplementary Fig. 2). This increased activation of chemokines in the aged sprouting neuron data set may localize to microglia that are captured as closely adjacent to sprouting neurons. The immune response is accelerated in the aged brain after stroke<sup>31</sup> and this data suggests that an aspect of this immune response localizes uniquely to the immediate environment of peri-infarct sprouting neurons in the aged brain.

### **Axonal sprouting in cortical motor connections**

Axonal sprouting occurs in peri-infarct cortex in rodents and primates<sup>22,23</sup> in the region that recovers function after stroke<sup>32</sup>. To definitively establish that a candidate molecular system plays a role in axonal sprouting in peri-infarct cortex it is necessary to directly identify the cortical connections in conditions of gain or loss of function in the molecular system, and to statistically compare these connections to establish whether new or altered connection patterns have formed. A problem in performing such a statistical comparison of cortical connections across experimental conditions is that axonal sprouting normally occurs after stroke in a small subpopulation of all cortical connections of a given region (Supplementary Fig. 13), and these “sprouted” connections are not morphologically or molecularly distinct from neighboring, non-sprouted connections in a way that would allow their selective isolation<sup>22,23</sup>. To definitively identify the pattern of cortical connections that correspond to axonal sprouting we utilized a technique to quantitatively map the connections of the forelimb motor cortex in control, stroke, and stroke plus gain or loss of function in ATRX, IGF1, Lingo1/NgR1 and NgR2 conditions. In this technique a small injection of the tracer BDA is placed in forelimb motor cortex 21 days after stroke, a time period in which axonal sprouting after stroke has been identified<sup>22</sup>. Seven days later the cortex is isolated, flattened, cut tangentially and stained for the location of axons (BDA label) (Supplementary Fig. 11c,e) and the mouse somatosensory body map (cytochrome oxidase) (Fig. 3c,f) in the same sections. The position of all labeled axons is plotted in  $x/y$  coordinates relative to the injection site, registered to the mouse somatosensory cortex and aligned with all brains of the same treatment condition to provide a composite map for forelimb motor cortex connections by treatment group. Each map is then statistically compared across treatment group: control, stroke, stroke + gain/loss of function using two statistical tests. Further, the location of significantly different axonal projections is localized to functional areas of the

mouse cortex by comparison to the aligned somatosensory body map. The location and volume of the injections did not differ across animals or treatment groups (Supplementary Figs. 6,7). The overall axon number projecting from the BDA injection site also did not significantly differ across individual animals or treatment groups, except in conditions in which the axonal connections were deliberately induced after stroke, with growth inhibitor blockade (Lingo1 and NgR1) (Supplementary Fig. 11) or growth-promoting gene knockdown (ATRX) (Fig. 4b). In this method, axonal sprouting is defined as the presence of a statistically significant new motor cortex projection between experimental groups.

This quantitative connectional mapping of the forelimb motor cortex projections indicates that stroke induces axonal sprouting in peri-infarct cortex. Small tracer injections into the motor cortex label axonal projections to motor, premotor and first and second somatosensory cortex in the normal (non-stroke animal) (Fig.3d), consistent with previous reports of mouse motor system cortical connections<sup>33</sup>. Comparing these motor system projections between control (non-stroke) and stroke indicates that connections in stroke are more widespread (Fig. 3d,e) and there is an overall increase in axonal number in this peri-infarct axonal sprouting (Supplementary Fig. 11a). When these connectional maps are registered to the mouse somatosensory body map, the axonal projections induced in peri-infarct cortex are located in motor, premotor and lateral somatosensory areas (Fig. 3g). This pattern of post-stroke axonal sprouting is experimentally robust, as it can be seen in the control experiment in a comparison of stroke + scrambled sequence siRNA to normal (non-stroke) control (see light blue label that shows post-stroke connections in Fig. 4e); and the pattern of post-stroke axonal sprouting does not differ between normal C57Bl/6 mice with stroke, and a C57Bl6 with the NgR2 knockout with stroke

(Supplementary Fig. 12d). In this comparison, the NgR2 knockout did not influence post-stroke axonal sprouting.

ATRX functions to induce post-stroke axonal sprouting and Lingo1/NgR1 signaling normally restricts post-axonal sprouting. When ATRX expression is knocked down the motor system the projection pattern after stroke is not significantly different than normal (non-stroke) control (Fig. 4c,d). ATRX is a SWI2/SNF2 DNA helicase/ATPase that plays a role in chromatin remodeling. Loss of ATRX function leads to neuronal cell death during brain development, and altered neuronal precursor migration<sup>34</sup>, and in humans produces a mental retardation syndrome<sup>1</sup>. ATRX also interacts with MECP2 and may have a function in methylation-dependent epigenetic DNA expression<sup>35</sup>. ATRX expression remains strong in the adult brain (Fig. 2b-d, Supplementary Fig. 3i) but a role for ATRX in the adult has not been determined. The present data indicate that ATRX is induced in both young adult and aged sprouting neurons after stroke and mediates one aspect of tissue reorganization in this disease. Interestingly, knockdown of ATRX not only blocked post-stroke axonal sprouting, but also reduced the number of labeled axons below that seen in the normal brain with forelimb motor cortex BDA injections. This suggests that ATRX may function to maintain axonal connections in the un-manipulated or un-lesioned brain. Further study is needed to test this idea.

Functional blockade of Lingo1 signaling with a receptor chimera (Lingo1-Fc) or blockade of a co-receptor in this Nogo signaling complex, Nogo Receptor 1 (NgR1) also blocks post-stroke axonal sprouting (Fig. 6). This axonal sprouting effect is seen as an increase in the pattern of motor cortex projections into premotor and far lateral somatosensory areas (SII). The NgR

signaling system has been implicated in stroke-induced axonal sprouting in projections from neurons in the hemisphere opposite the stroke into the cervical spinal cord<sup>4</sup>. This data indicates that the NgR1 receptor complex normally confines axonal plasticity in the cortex adjacent to the stroke site. The effect of NgR1 signaling is enhanced in the aged brain, with an upregulation of Lingo1 precisely in the neurons that would be expected to participate in the most substantial axonal plasticity in peri-infarct cortex after stroke. Future studies will need to determine whether the paradoxical upregulation of Lingo1 axonal growth inhibition in the aged animals limits functional recovery.

#### **SUPPLEMENTARY REFERENCES**

1. Bérubé, N. et al. The chromatin-remodeling protein ATRX is critical for neuronal survival during corticogenesis. *J. Clin. Invest.* **115**, 258-267 (2005).
2. Li, S. & Carmichael, S.T. Growth-associated gene and protein expression in the region of axonal sprouting in the aged brain after stroke. *Neurobiol. Dis.* **23**, 362-373 (2006).
3. Carmichael, S.T. et al. Growth-associated gene expression after stroke: evidence for a growth-promoting region in peri-infarct cortex. *Exp. Neurol.* **193**, 291-311 (2005).
4. Lee, J., Kim, J.E., Sivula, M. & Strittmatter SM. Nogo receptor antagonism promotes stroke recovery by enhancing axonal plasticity. *J. Neurosci.* **24**, 6209-6217 (2004).
5. Carmichael, S.T. Gene expression changes after focal stroke, traumatic brain and spinal cord injuries. *Curr. Opin. Neurol.* **16**, 699-704 (2003).



6. Hossain-Ibrahim, M. et al. Effects of lipopolysaccharide-induced inflammation on expression of growth-associated genes by corticospinal neurons. *BMC Neurosci.* **7**, 8 (2006).
7. Ozdinler, P.H. & Macklis, J.D. IGF-I specifically enhances axon outgrowth of corticospinal motor neurons. *Nat. Neurosci.* **9**, 1371-1381 (2006).
8. Seiffers, R., Mills, C.D. & Woolf, C.J. ATF3 increases the intrinsic growth state of DRG neurons to enhance peripheral nerve regeneration. *J. Neurosci.* **27**, 7911-7920 (2007).
9. Lorber, B., Howe ML, Benowitz LI, Irwin N. Mst3b, and Ste20-like kinase, regulates axon regeneration in mature CNS and PNS pathways. *Nat. Neurosci.* **12**, 1407-1414 (2009).
10. Bonilla, I., Tanabe, K. & Strittmatter, S.M. Small proline-rich repeat protein 1A is expressed by axotomized neurons and promotes axonal outgrowth. *J. Neurosci.* **22**, 1303-1315 (2002).
11. Marklund, N. et al. Selective temporal and regional alterations of Nogo-A and small proline-rich repeat protein 1A (SPRR1A) but not Nogo-66 receptor (NgR) occur following traumatic brain injury in the rat. *Exp. Neurol.* **197**, 70-83 (2006).
12. Fan, G. et al. DNA methylation controls the timing of astrogliogenesis through regulation of JAK-STAT signaling. *Development* **132**, 3345-3356 (2005).
13. Twiss, J.L., Smith, D.S., Chang, B. & Shooter, E.M. Translational control of ribosomal protein L4 mRNA is required for rapid neurite regeneration. *Neurobiol. Dis.* **7**, 416-428 (2000).
14. Paxinos, G. & Watson, C. The mouse brain in stereotaxic coordinates. Academic Press, 2nd edition, San Diego, California, USA, 2001.

15. Callaway, E.M. & Katz, L.C. Emergence and refinement of clustered horizontal connections in cat striate cortex. *J. Neurosci.* **10**, 1134-1153 (1990).
16. Callaway, E.M. & Katz, L.C. Development of axonal arbors of layer 4 spiny neurons in cat striate cortex. *J. Neurosci.* **12**, 570-582 (1992).
17. Ma, Y., Hu, H., Berrebi, A.S., Mathers, P.H. & Agmon, A. Distinct subtypes of somatostatin-containing neocortical interneurons revealed in transgenic mice. *J. Neurosci.* **26**, 5069-5082 (2006).
18. Sugino, K. et al. Molecular taxonomy of major neuronal classes in the adult mouse forebrain. *Nat. Neurosci.* **9**, 99-107 (2006).
19. Chow, D.K. et al. Laminar and compartmental regulation of dendritic growth in mature cortex. *Nat. Neurosci.* **12**, 116-118 (2009).
20. Stroemer, R.P., Kent, T.A. & Hulsebosch, C.E. Neocortical neural sprouting, synaptogenesis, and behavioral recovery after neocortical infarction in rats. *Stroke* **26**, 2135-2144 (1995).
21. Li, Y., Jiang, N., Powers, C. & Chopp, M. Neuronal damage and plasticity identified by microtubule-associated protein 2, growth-associated protein 43, and cyclin D1 immunoreactivity after focal cerebral ischemia in rats. *Stroke* **29**, 1972-1980 (1998).
22. Carmichael, S.T., Wei, L., Rovainen, C.M. & Woolsey, T.A. New patterns of intracortical projections after focal cortical stroke. *Neurobiol. Dis.* **8**, 910-922 (2001).
23. Dancause, N. et al. Extensive cortical rewiring after brain injury. *J. Neurosci.* **25**, 10167-10179 (2005).
24. Carmichael, S.T. Cellular and molecular mechanisms of neural repair after stroke: making waves. *Ann. Neurol.* **59**, 735-742 (2006).

25. Scheff, S.W. & Cotman, C.W. Recovery of spontaneous alternation following lesions of the entorhinal cortex in adult rats: possible correlation to axon sprouting. *Behav. Biol.* **21**, 286-293 (1977).
26. Leon, S. Yin, Y., Nguyen, J., Irwin, N. & Benowitz, L.I. Lens injury stimulates axon regeneration in the mature rat optic nerve. *J. Neurosci.* **20**, 4615-4626 (2000).
27. Wang, Y.J., Zhou, C.J., Shi, Q., Smith, N. & Li, T.F. Aging delays the regeneration process following sciatic nerve injury in rats. *J. Neurotrauma* **24**, 885-894 (2007).
28. Pertz, O.C. et al. Spatial mapping of the neurite and soma proteomes reveals a functional Cdc42/Rac regulatory network. *Proc. Natl. Acad. Sci. U. S. A.* **105**, 1931-1936 (2008).
29. Chen, H.L. & Panchision, D.M. Concise review: bone morphogenetic protein pleiotropism in neural stem cells and their derivatives--alternative pathways, convergent signals. *Stem Cells* **25**, 63-68 (2007).
30. Hocking, J.C., Hehr, C.L., Chang, R.Y., Johnston, J. & McFarlane, S. TGFbeta ligands promote the initiation of retinal ganglion cell dendrites in vitro and in vivo. *Mol. Cell Neurosci.* **37**, 247-260 (2008).
31. Popa-Wagner, A., Carmichael, S.T., Kokaia, Z., Kessler, C. & Walker, L.C. The response of the aged brain to stroke: too much, too soon? *Curr. Neurovasc. Res.* **4**, 216-227 (2007).
32. Nudo, R.J., Wise, B.M., SiFuentes, F. & Milliken, G.W. Neural substrates for the effects of rehabilitative training on motor recovery after ischemic infarct. *Science* **272**, 1791-1794 (1996).
33. Porter, L.L. & White, E.L. Afferent and efferent pathways of the vibrissal region of primary motor cortex in the mouse. *J. Comp. Neurol.* **214**, 279-289 (1983).

34. Seah, C. et al. Neuronal death resulting from targeted disruption of the Snf2 protein ATRX is mediated by p53. *J. Neurosci.* **28**, 12570-12580 (2008).
35. Nan, X. et al. Interaction between chromatin proteins MECP2 and ATRX is disrupted by mutations that cause inherited mental retardation. *Proc. Natl. Acad. Sci. U. S. A.* **104**, 2709-2714 (2007).

## Supplementary Figure 1

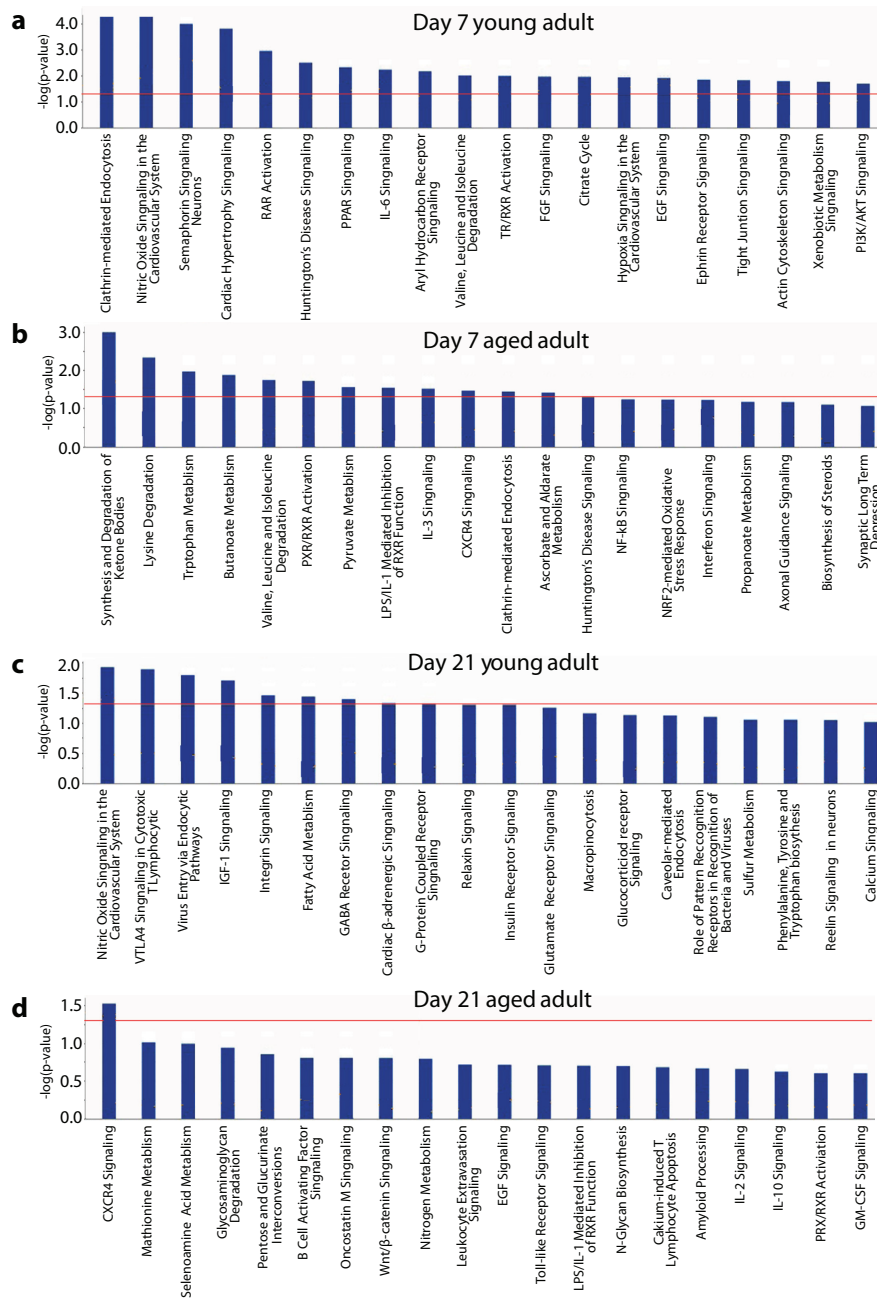

### Figure S1. Functional grouping of differentially expressed genes by stroke in sprouting neurons.

The genes differentially expressed in aged and young adult sprouting neurons at  $p < 0.005$  level and  $\log_2 > |0.2|$  were tested for their association in canonical cell signaling pathways. In this analysis, genes were tested for significant association in specific cell functional or signaling pathways versus random chance association in a total curated database of gene interactions of over 23,900 human, rat, and mouse genes by right-tailed Fisher's exact test (Ingenuity Systems). Significance was assessed by testing the number of genes that were regulated by sprouting neurons in a specific pathway versus total number of genes in this database for that pathway. The red line in the left graph indicates the threshold for a significant association, the  $-\log(0.05)$ .

# Supplementary Figure 2

## Regulated in young adult day 7

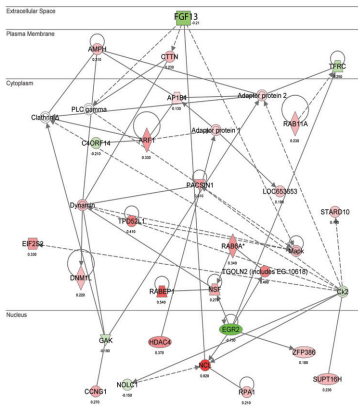

Network 1

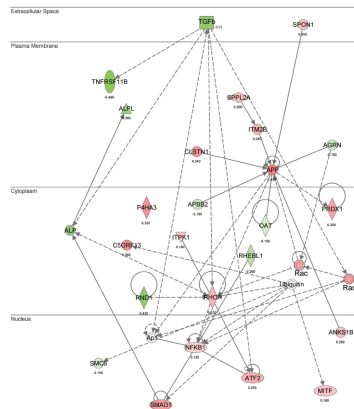

Network 2

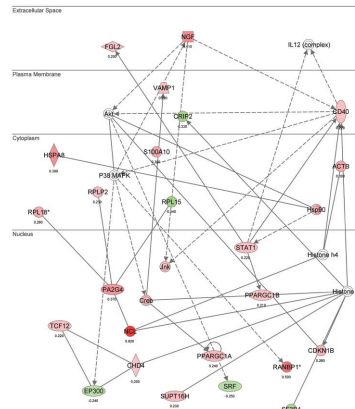

Network 3

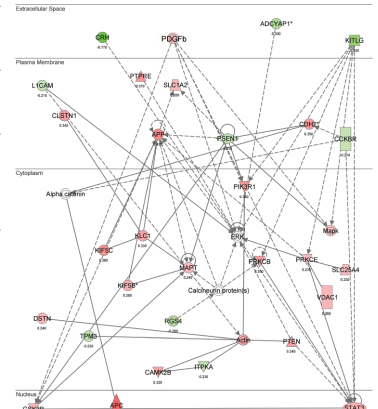

Network 4

## Regulated in aged adult day 7

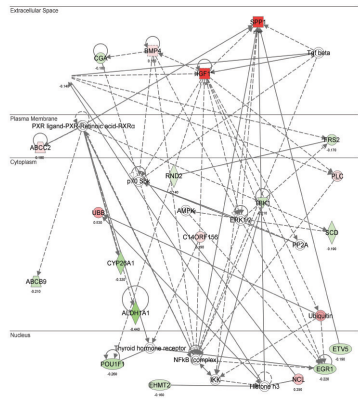

Network 5

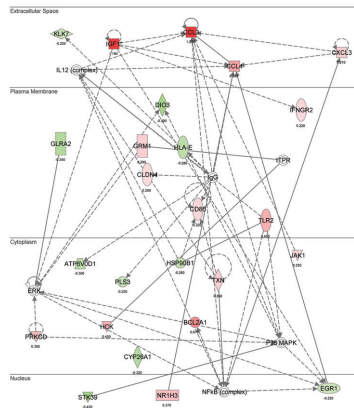

Network 6

## Regulated in young not aged adult day 7

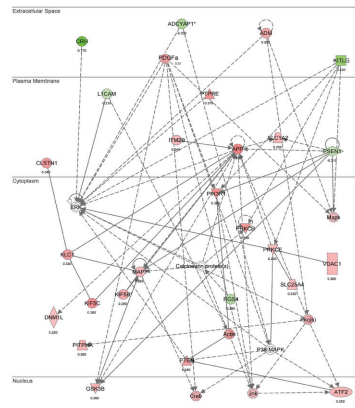

Network 7

## Regulated in aged not young adult day 7

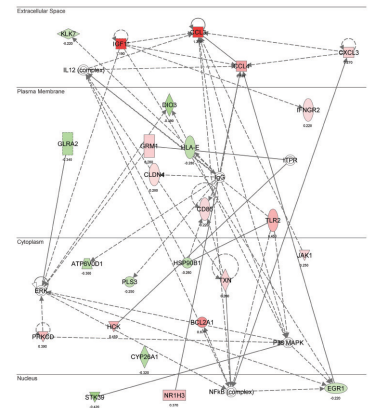

Network 8

**Figure S2. Molecular networks regulated by stroke in sprouting neurons.** The data set of genes regulated at the  $p < 0.005$  level and  $\log_2 > |0.2|$  were tested for molecular interactions that form specific gene networks. Each panel shows a network of interacting gene products whose expression is differentially regulated in response to stroke in the young adult (Network 1-4,7) and aged peri-infarct neurons after stroke (Network 5,6,8). Genes colored red are upregulated; genes colored green are downregulated. Solid lines depict a direct physical interaction between two molecules and dotted lines indicate an indirect interaction. Numbers near each gene symbol indicate  $\log_2$  change in sprouting vs. control expression level.

### Supplementary Figure 3

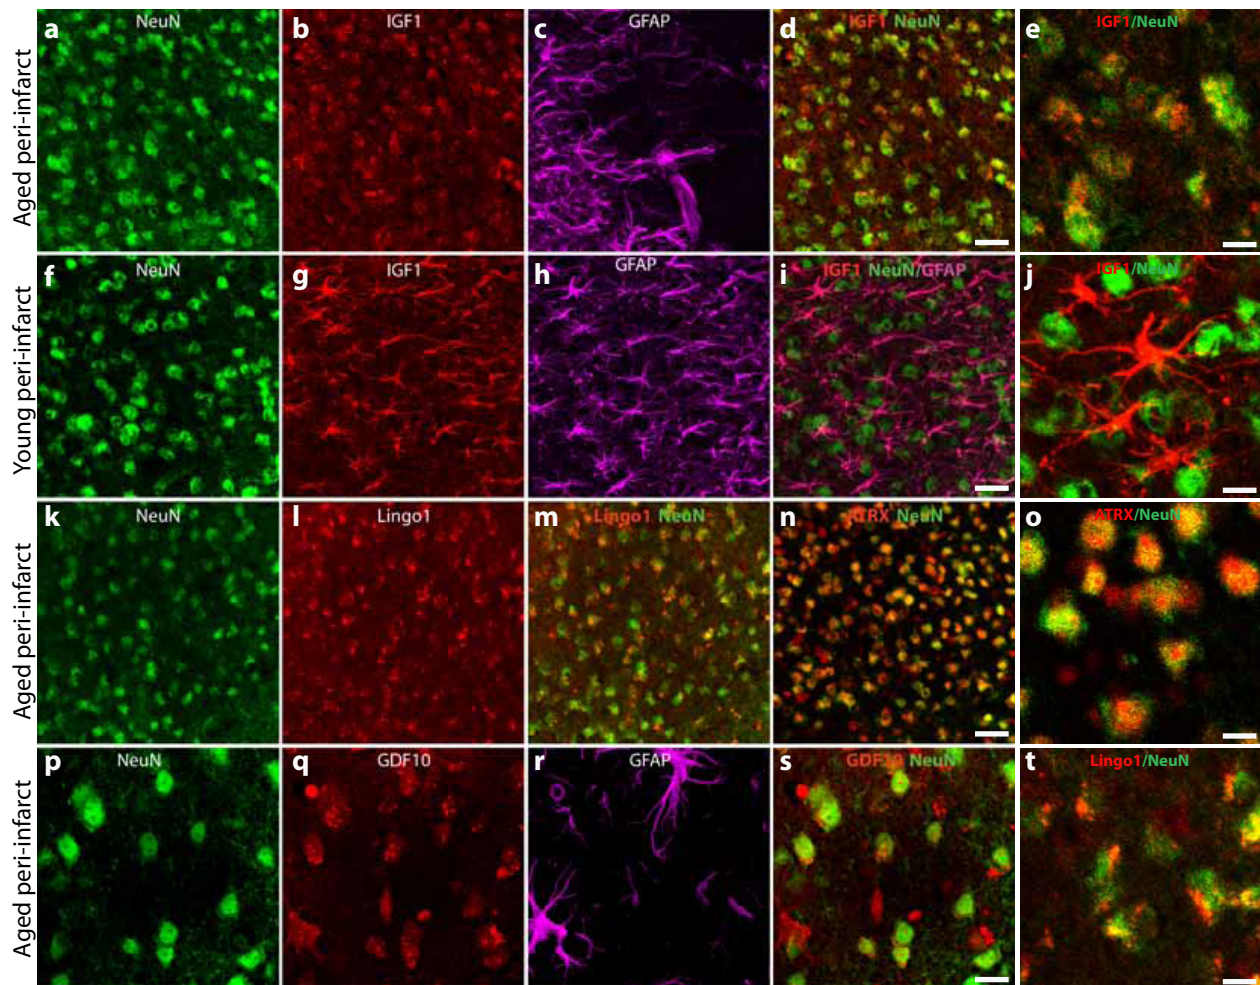

**Figure S3. Cellular pattern of IGF1, Lingo1, ATRX and GDF10 expression in peri-infarct tissue after stroke.** Each row is a multifluorescent immunohistochemistry staining result from the same area of peri-infarct cortex. (a,f) NeuN (green), (b,g) IGF1 (red) and (c,h) GFAP (purple) immunostaining in peri-infarct cortex. (d,e) IGF1 and NeuN are colocalized in aged peri-infarct tissue and appear as yellow in IGF1+/NeuN+ neurons. In contrast IGF1 staining co-localizes with GFAP staining in peri-infarct cortex of young adults, producing a light purple color (i,j). (k) NeuN (green) and (l) Lingo1 (red) immunostaining in peri-infarct cortex. Colocalized staining of Lingo1/NeuN (m,t) and ATRX/NeuN (m,o) is seen as yellow in the aged peri-infarct cortex. (p) NeuN (green), (q) GDF10 (red) and (r) GFAP (purple) immunostaining in peri-infarct cortex. (s) Colocalized staining is seen as yellow in the GDF10+/NeuN+ neurons. Astrocytes also express GDF10. Scale bars = 50  $\mu$ m (a-d, f-i, k-n), 30  $\mu$ m (p-s) and 10  $\mu$ m (e,j,o,t).

Supplementary Figure 4

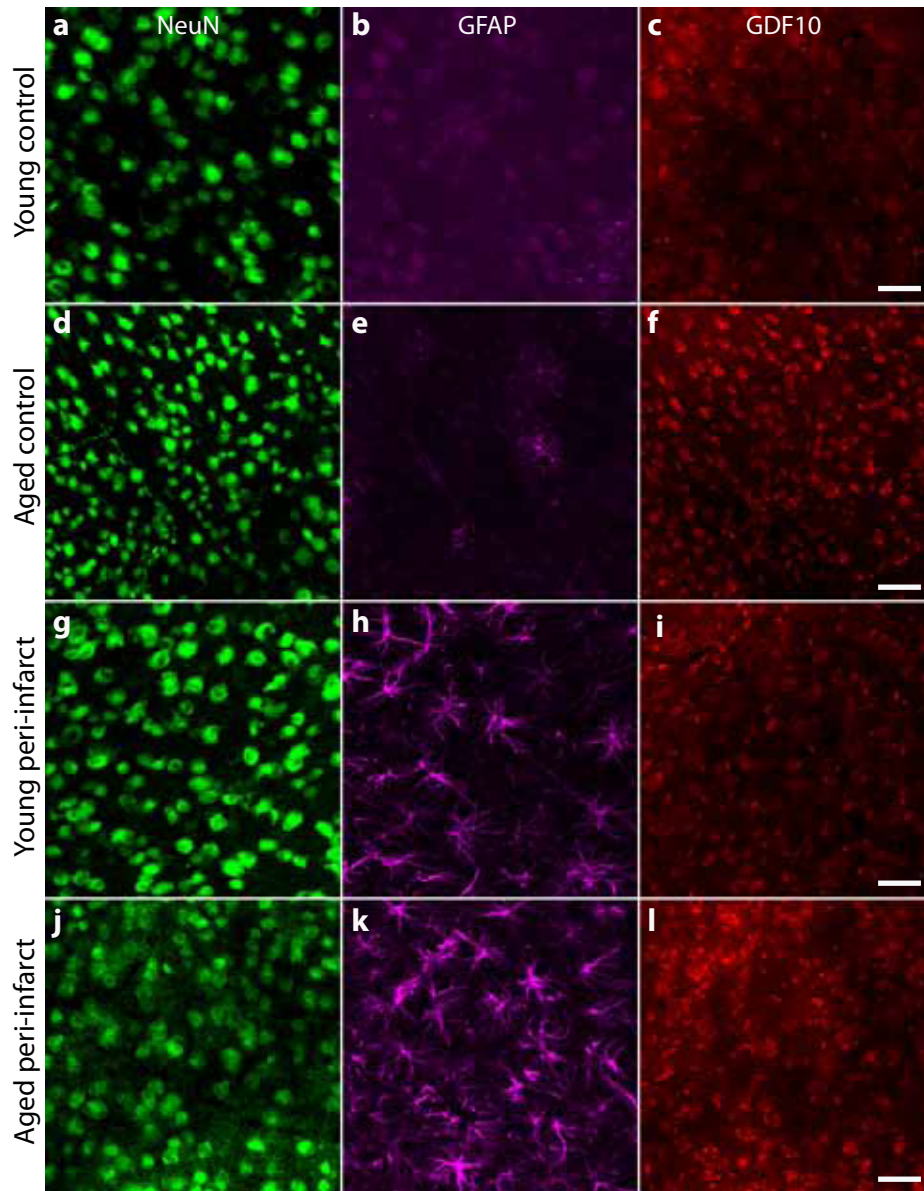

**Figure S4. Overall cellular pattern of GDF10 expression in brain tissue.** NeuN (green), GFAP (purple) and GDF10 (red) immunostaining in control (a-f) and peri-infarct cortex (g-l) in each condition. GDF10 immunostaining is more intense in aged peri-infarct cortex. Scale bars = 50  $\mu$ m.



## Supplementary Figure 5

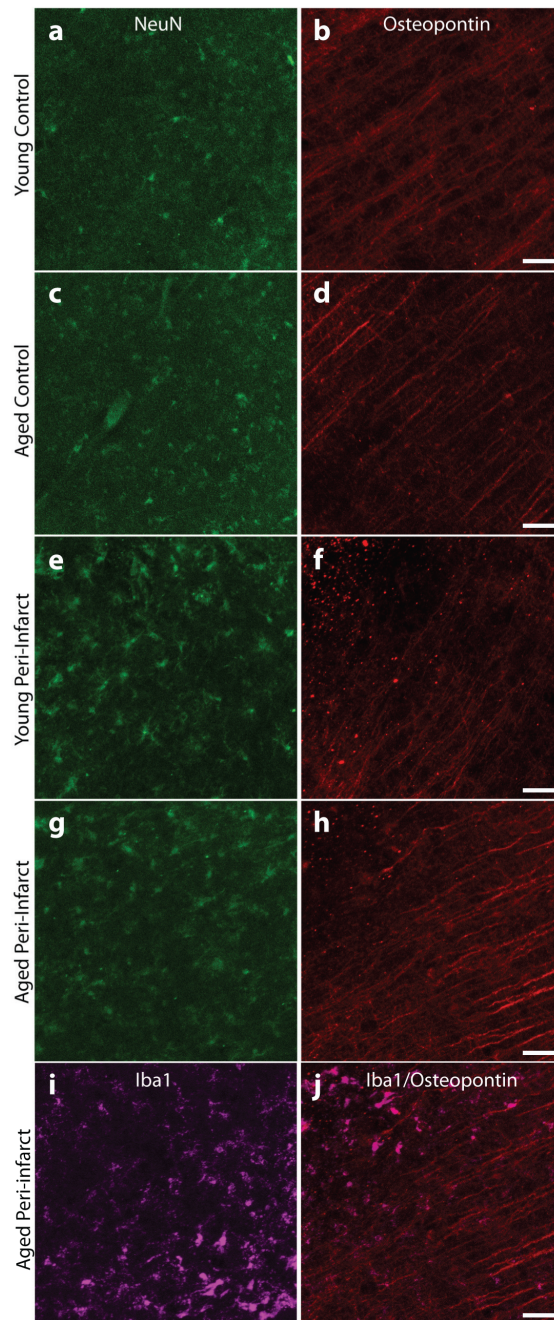

**Figure S5. Cellular pattern of osteopontin immunostaining in brain tissue.** NeuN (green) and osteopontin (red) immunostaining in control (a-d) and peri-infarct cortex (e-h). Iba1 (purple) immunostaining (i) and colocalized staining of Iba1/osteopontin (light purple) (j) in the aged peri-infarct cortex. Note osteopontin signal in the apical dendrites of neurons of both young and aged adult control brains (b,d), and greater intensity of immunostaining in aged peri-infarct tissue (h). Scale bars = 50  $\mu$ m.

## Supplementary Figure 6

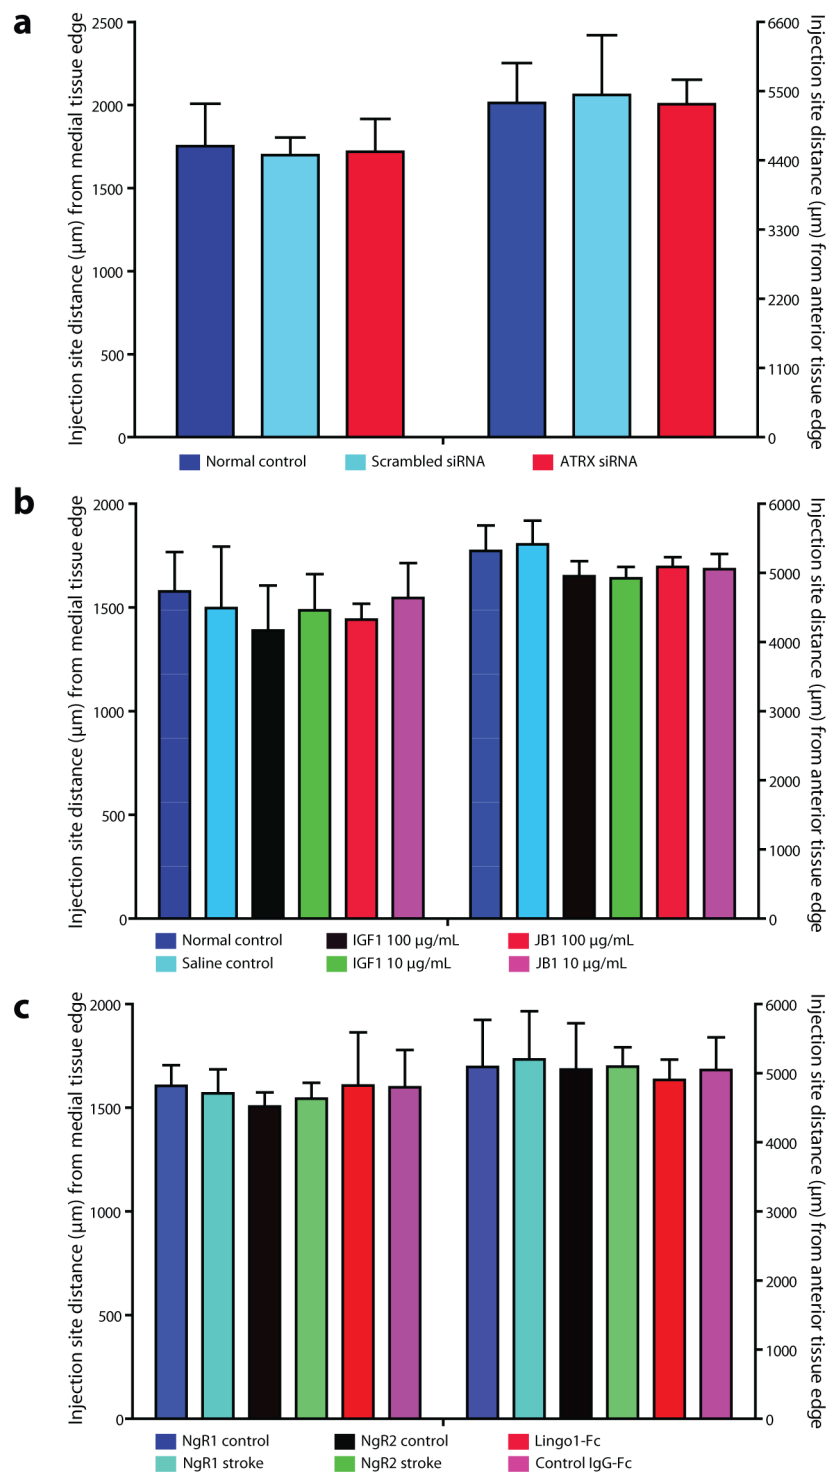

**Figure S6. Anterior/posterior and medial/lateral injection site of BDA injections.** There were no significant differences in anterior/posterior location of injection sites across experimental groups (a,b,c).

## Supplementary Figure 7

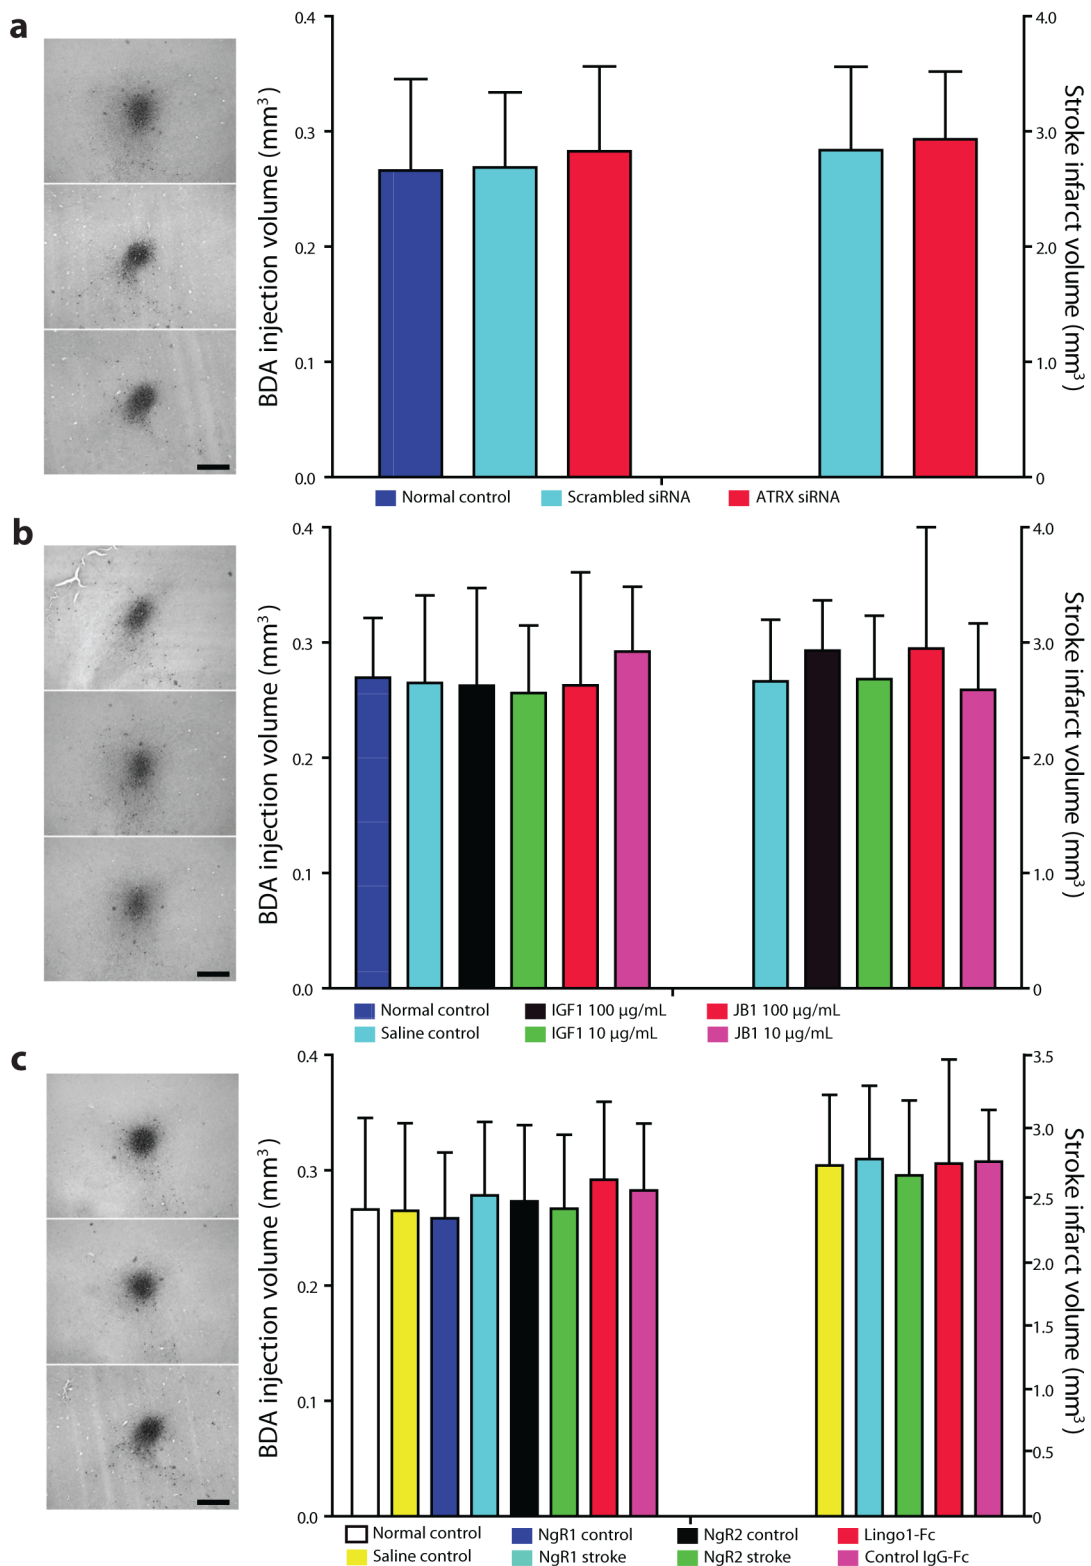

**Figure S7. BDA injection volume and infarct volume.** There were no significant differences in BDA or infarct volumes across treatment conditions following stroke plus ATRX siRNA, scrambled siRNA, or plus hydrogel delivery of IGF1, JB1, Lingo1-Fc or control Fc. Photomicrographs (left panel) show representative BDA injection sizes for each experimental condition (images are from 9 animals total) (a,b,c). Scale bars = 20µm.

## Supplementary Figure 8

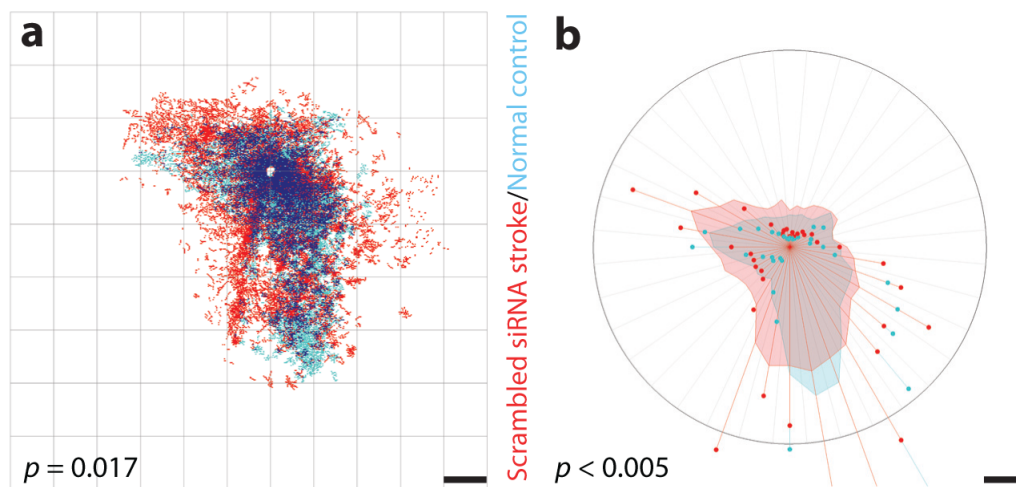

**Figure S8. Scrambled siRNA effect in post-stroke axonal connections.** (a) Quantitative connectional map of forelimb sensorimotor connections in non-stroke/control ( $n = 11$ , blue) and stroke + scrambled siRNA ( $n = 10$ , red). There is a significant difference in the pattern of cortical connections between non-stroke/control and stroke + scrambled siRNA. (b) Polar analysis of connections. Shaded regions represent 70th percentile of the distances of labeled axons from the injection site in each segment of the graph; weighted polar vectors represent the normalized distribution of the quantity of points in a given segment of the graph for scrambled siRNA or non-stroke/control ( $p < 0.005$ ). This data indicates that post-stroke axonal sprouting is present in conditions of normal stroke (Fig. 3) and stroke+scrambled siRNA. Scale bars =  $500\mu\text{m}$ .

## Supplementary Figure 9

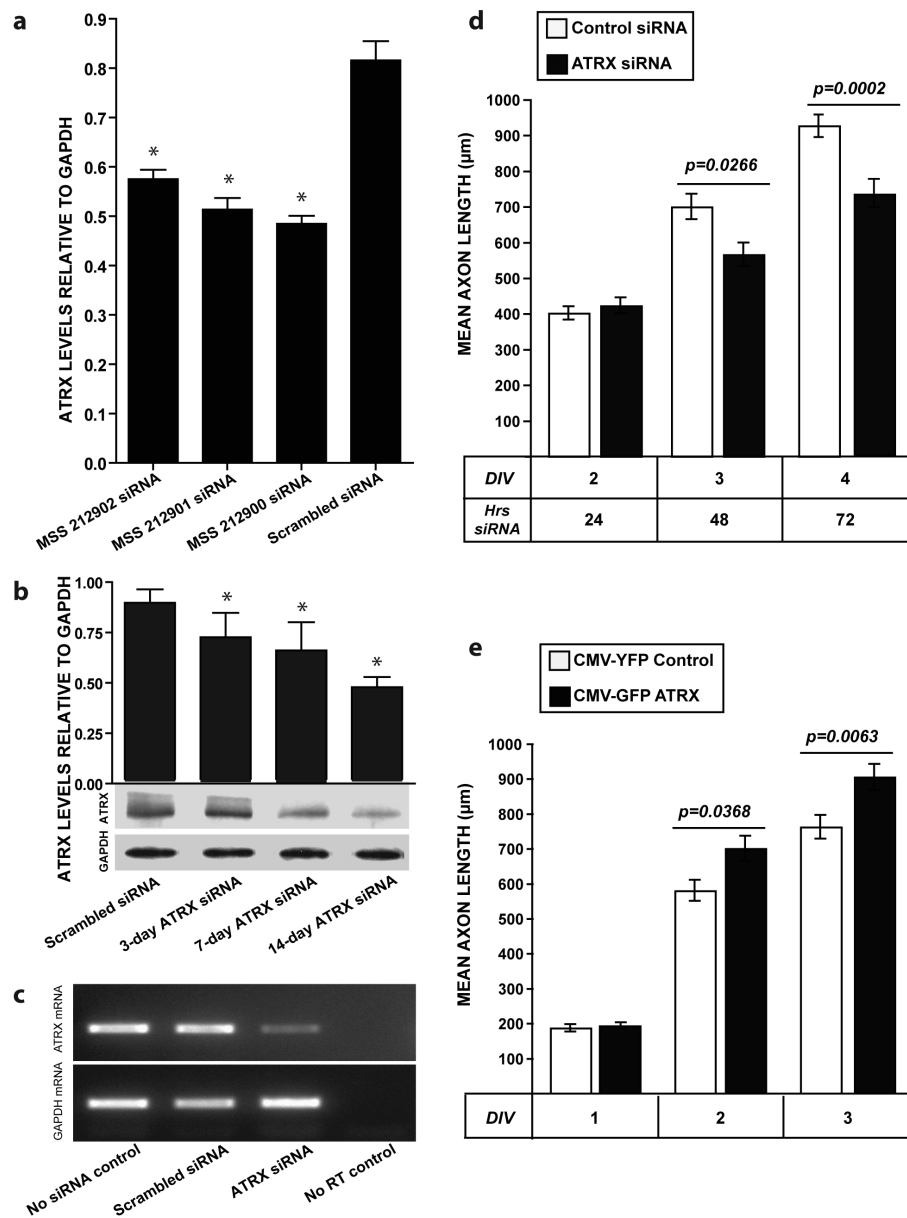

**Figure S9. Expression of protein and message in ATRX siRNA knockdown.** (a) Protein level of ATRX in vitro. A set of three ATRX siRNA significantly knocks down ATRX protein expression in mouse neural progenitor cells<sup>12</sup>. MSS212900 has the greatest knockdown effect. (b) Protein effect of ATRX in vivo. ATRX siRNA, using MSS212900, significantly knocks down the level of ATRX protein in peri-infarct cortex post-stroke. ATRX levels were measured in the peri-infarct cortex 3, 7 and 14 days after stroke (upper panel in b). Representative Western blots of ATRX protein level in control and in vivo knockdown conditions (lower panel in b). (c) Rt-PCR data for mRNA effect of ATRX siRNA in vitro. ATRX siRNA significantly knocks down mRNA levels in PC12 cells<sup>13</sup>. (d,e) Axon length of adult DRG cells under conditions of loss (e) and gain (d) of ATRX function. Panel d shows gradual increase in axon outgrowth with days in vitro (DIV) under normal (control) conditions. With ATRX siRNA knockdown, axonal outgrowth is significantly reduced. ATRX siRNA is applied after one day in vitro, and the length of exposure to siRNA is shown as hrs siRNA. (e) Overexpression of ATRX with induces a significant increase in axonal outgrowth at days 2 and 3 in vitro. (\* P < 0.05).

## Supplementary Figure 10

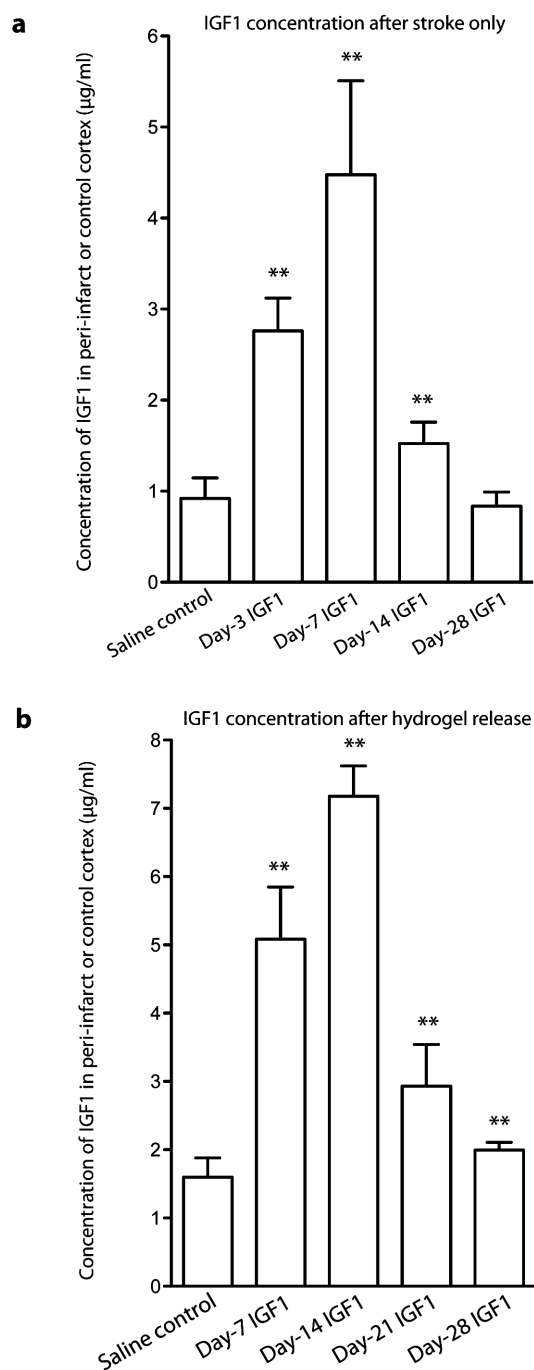

**Figure S10. Endogenous IGF1 and IGF1 sustained release after stroke.** (a) IGF1 concentration in peri-infarct cortex after stroke. There is a peak concentration of over 4.48 µg/ml at 7 days, which returns to the basal level at 28 days after stroke. (b) IGF1 is effectively released from hydrogel in vivo and is present in peri-infarct cortex at 4 weeks post implantation. Hydrogel impregnated with 100 µg/ml of IGF1 or saline was implanted in the infarct cavity at 1 week after stroke. Animals (n = 8) were sacrificed at 7, 14, 21, and 28 days post implantation. IGF1 is detectable in peri-infarct cortex at days 7-28, with a peak concentration of over 7.18 µg/ml at 14 days post stroke. This indicates that IGF1 release from the hydrogel further increases IGF1 levels to a greater extent at prolonged time points compared with endogenous IGF1 (\*\* p < 0.05).

## Supplementary Figure 11

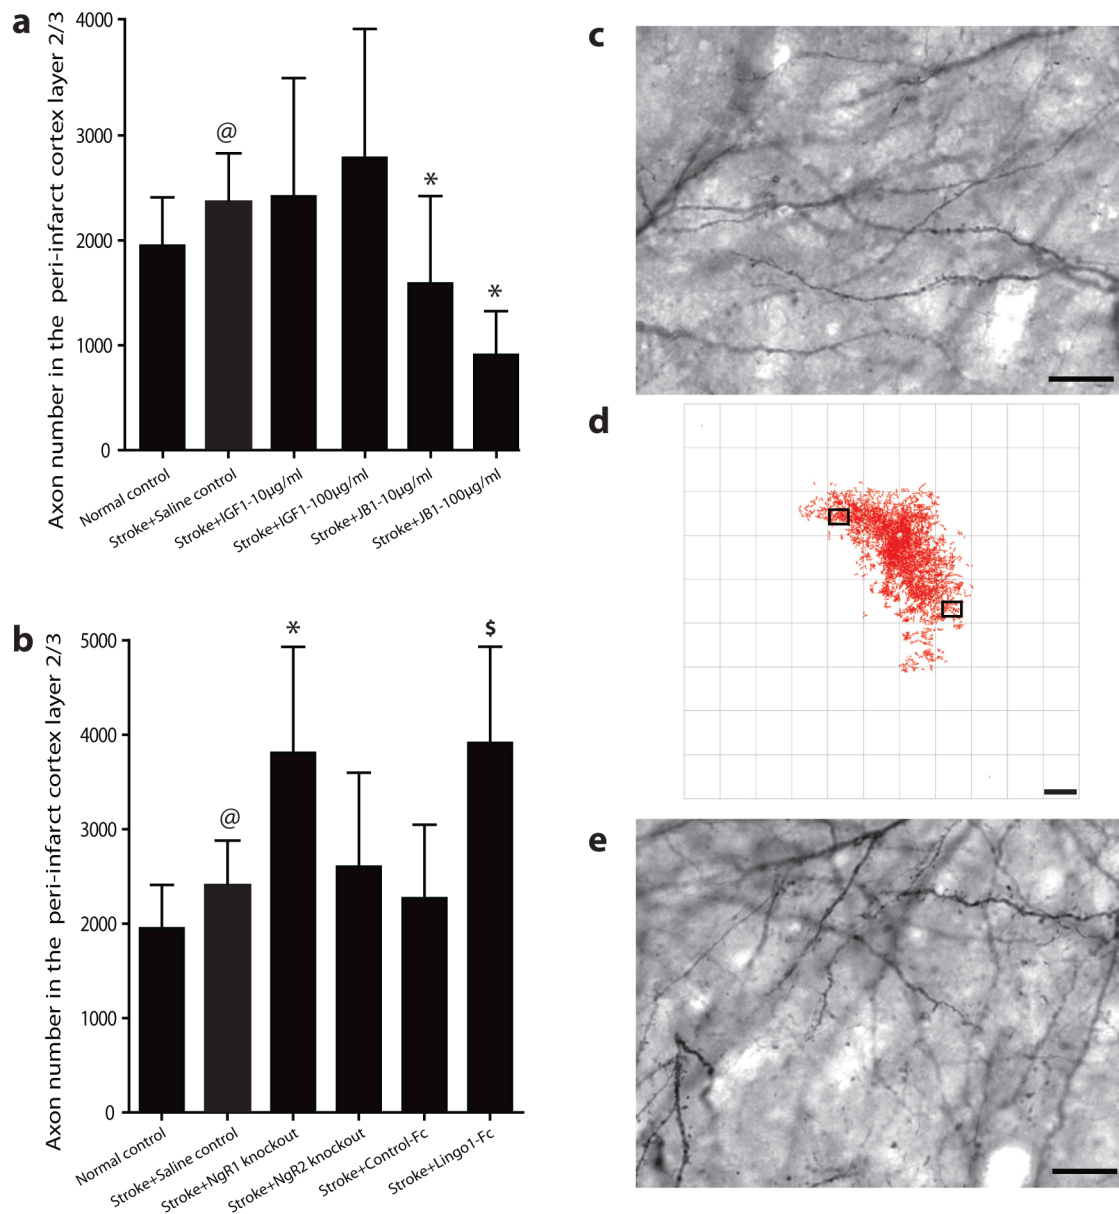

**Figure S11. Axon number in peri-infarct cortex after stroke.** (a) Axon number in peri-infarct cortex layer 2/3 with IGF-1 or JB1. (b) Lingo1-Fc, NgR1 or NgR2 knockout mice. (c, e) Representative images of BDA-labeled axons taken from (d) the quantitative connective map of forelimb sensorimotor cortex connections after stroke. These axons are labeled to produce the connective maps. Scale bars represent 50µm (\*, @ and \$ indicate significant difference compared to saline stroke, normal control and control-Fc stroke, respectively).

## Supplementary Figure 12

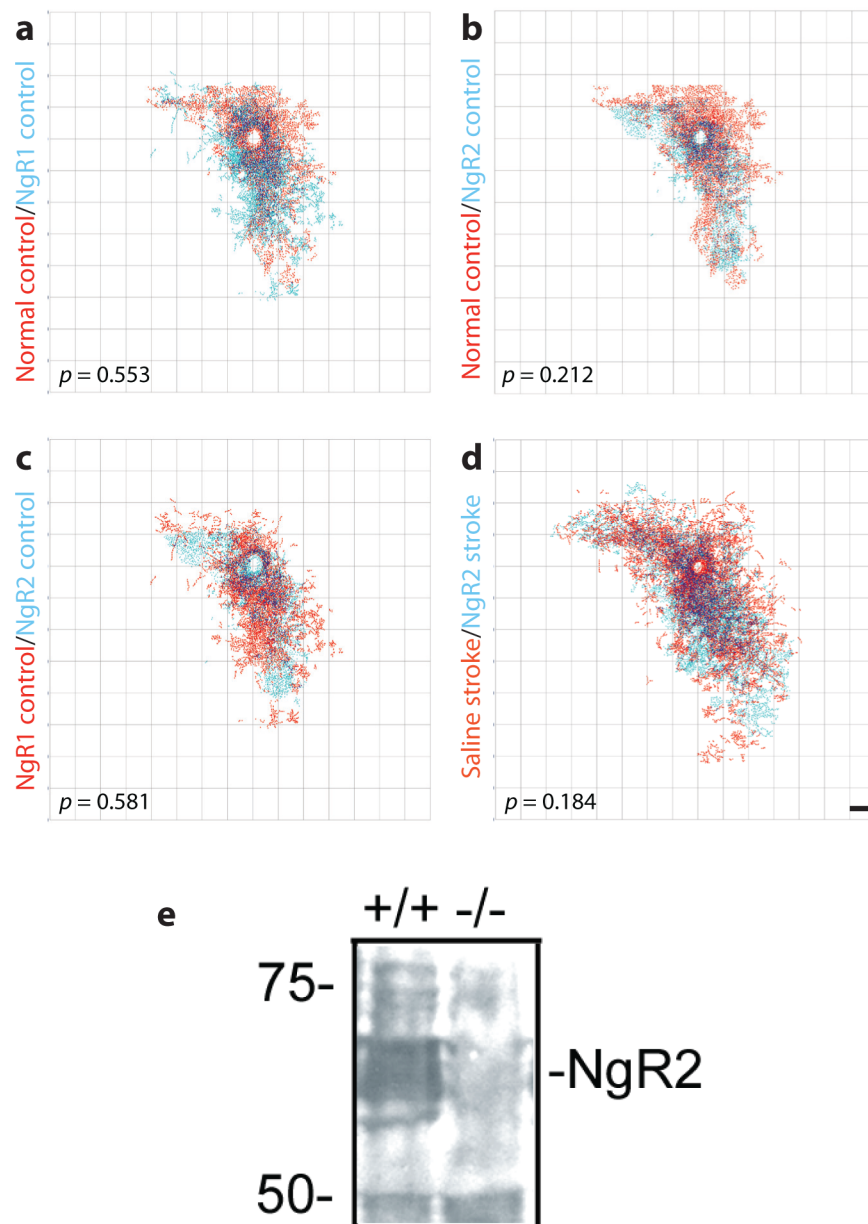

**Figure S12. Axonal connections in *NgR1* and *NgR2* knockout mice.** (a,b) Quantitative connective map of forelimb motor cortex connections in non-stroke *NgR1* control (n = 5), non-stroke *NgR2* control (n = 5) and normal control mice (n = 5), registered to the body map of underlying cortex. Dark blue shows area of dense overlap of connections in the two conditions. There is no significant difference in the pattern of cortical connections between non-stroke *NgR1* and normal control or non-stroke *NgR2* control versus normal control. (c,d) There is no significant difference in the pattern of cortical connections between non-stroke *NgR1* and *NgR2* control, or between *NgR2* stroke (n = 6) and saline stroke (n = 5). (e) Western blot on cell lysates from cortex in wild type and *NgR2* *-/-* mice. Note *NgR2* protein (65 kDa) is no longer found in lysates of mutant mice. Scale bar = 500  $\mu$ m.



## Supplementary Figure 13

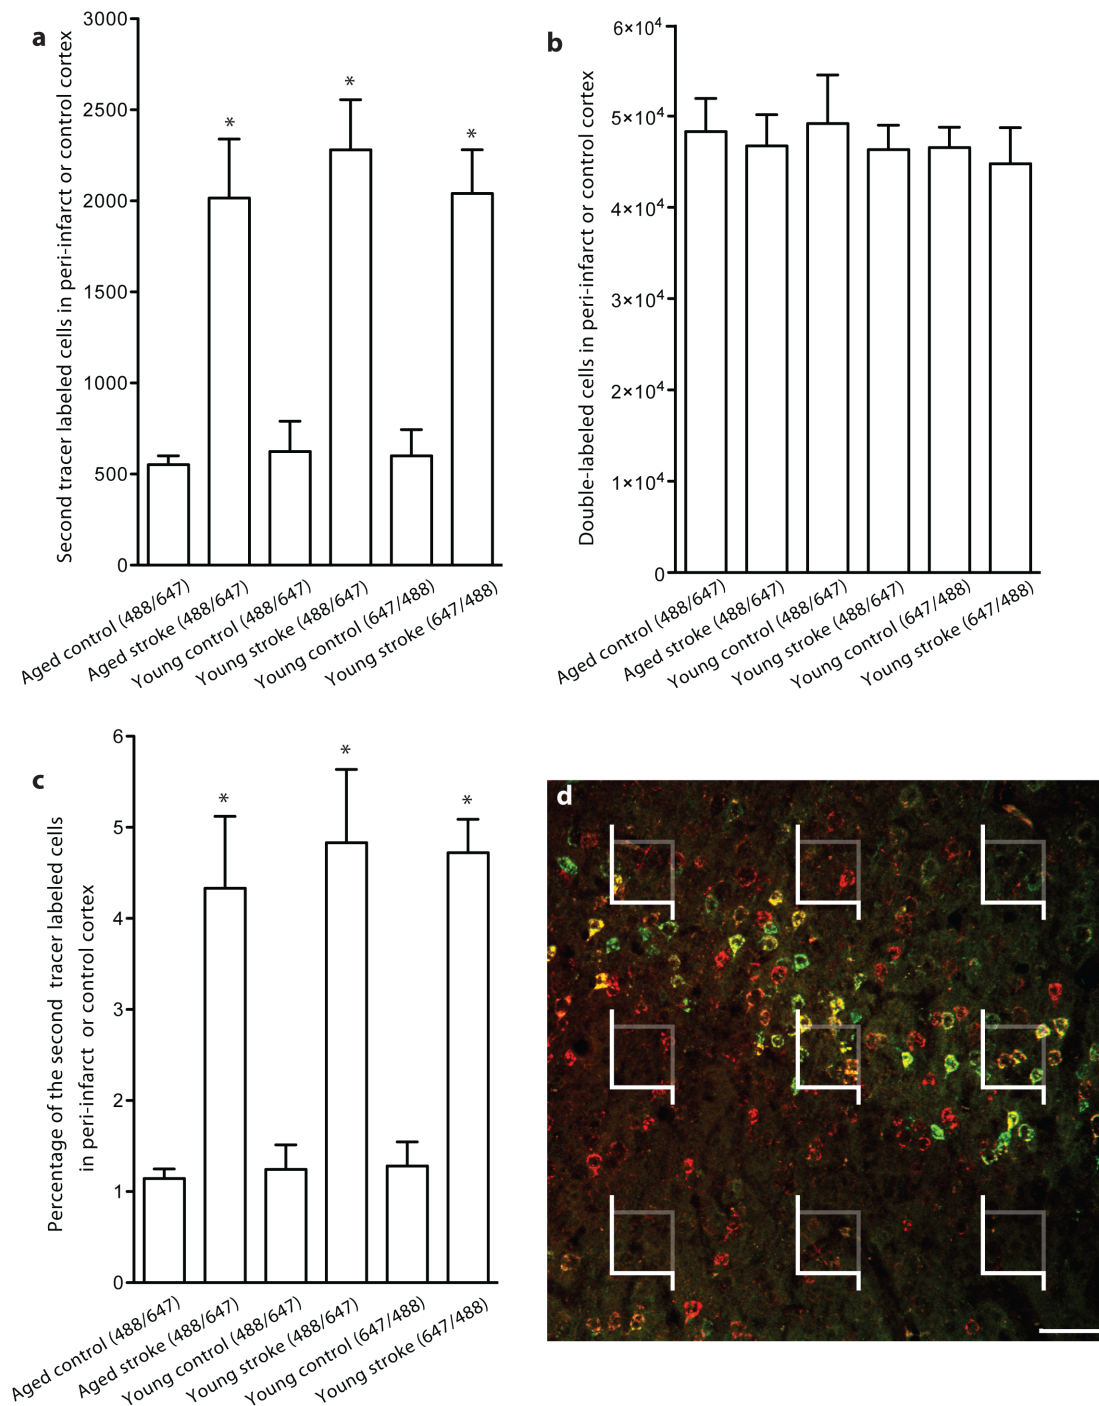

**Figure S13. Stereological cell counting of labeled neurons in peri-infarct cortex.** There is a significant increase in number of the second tracer labeled cells in the stroke peri-infarct cortex when compared with non-stroke control. No significance in the second labeled cells is found among the groups in peri-infarct or in control cortex. (b) Population of the double (CTb 488 and CTb 647) labeled cells. No difference in double-labeled cells is noted among all groups. (c) Percentage of the second tracer labeled cells. Note the percentage of the second tracer labeled cells in the stroke peri-infarct exhibits 4 times greater than that in the control cortex. (d) Stereological technique for cell counting with representative labeled cells. Note the first tracer is in red, the second tracer is green, and double labeled neurons are yellow (\* $p < 0.05$ ). Scale bar = 100 μm

Table S1. Primer sequences of target genes

| Target or reference |          | Primer sequence            | Tm     | Genbank No.  |
|---------------------|----------|----------------------------|--------|--------------|
| ALCAM               | forward  | GGTGTTCAAGCAACCATCTAAACC   | 54.22  | NM_031753    |
|                     | reversed | AGCACTTTCCCATTCCCTATAACCAC |        |              |
| ATF3                | forward  | TCTGGAGATGTCAGTCACCAAGTC   | 55.15  | NM_012912    |
|                     | reversed | CTCCAGTTTCTCTGACTCCTTCTG   |        |              |
| ATRX                | forward  | TGTGTCCAATTCGGATGAAGAAGG   | 53.80  | XM_217570    |
|                     | reversed | CTTAGCTTTGGGTACCTTATGAGG   |        |              |
| BTG1                | forward  | GGCAGAGCATTACAAACATCACTG   | 54.288 | NM_017258    |
|                     | reversed | TGGGAGAAGCCTGAACAACCTTTG   |        |              |
| CEACAM10            | forward  | GTCTGTGCAATTTCTGTATACCC    | 53.94  | NM_173339    |
|                     | reversed | GACACCATCAGCCGATGAAATCTC   |        |              |
| CHIMAERIN1          | forward  | GGTCTGAATTCTGAAGGACTCTAC   | 55.52  | NM_032083    |
|                     | reversed | AGCGCTCCAGTGATAATGTTGATG   |        |              |
| FILIP1              | forward  | CTGCCCGGAAGACAATAAGATCAG   | 54.45  | NM_145682    |
|                     | reversed | GGTTCTGAACTTCTGCTCCAACCTG  |        |              |
| GDF10               | forward  | GTGCTAGACGGAGCTTATAGACAG   | 54.01  | NM_024375    |
|                     | reversed | CAGACCATGGTGAATTCCAGATTC   |        |              |
| GPC3                | forward  | TGTGGTAGAGATCGACAAGTACTG   | 53.73  | NM_012774    |
|                     | reversed | CTGCACATACTGGATGGAATCATG   |        |              |
| IGF1                | forward  | CTCCGCTGAAGCCTACAAAGTCAG   | 55.10  | BC086374     |
|                     | reversed | GAGGCTCCTCCTACATTCTGTAGG   |        |              |
| LHX9                | forward  | ACCTCTGGCCACCTCCTCTCCAAG   | 56.17  | BC128722     |
|                     | reversed | TGCCTCTAGAGTGGTGCCGTTTCAG  |        |              |
| MELK                | forward  | TGCCGTTCAATGGAAGTGGATCTC   | 54.80  | XM_342828    |
|                     | reversed | CAGAGCCCTTCTTCTTGTTCCTTG   |        |              |
| MST3B               | forward  | GTGGAGGCCTGTTTGAATAAGGAG   | 55.10  | AF083420     |
|                     | reversed | TGCTCGGCCTTCCATCTCTTGTAC   |        |              |
| NgR1                | forward  | CCAGTGTTCTGAGCAGCTTTCC     | 58.12  | NM_053613    |
|                     | reversed | CATGGAGAGGTTGTTGGCAAACAG   |        |              |
| NgR2                | forward  | AGGGTCTGGAGAGGCTGCAGTCAC   | 58.63  | NM_199223    |
|                     | reversed | GTCCGCGAACAAGTCATCCTGTAG   |        |              |
| NPTN                | forward  | TTCCTGTCACCCTGCAGTGTAACC   | 54.66  | NM_019380    |
|                     | reversed | CCTCAGCTCTTGGCTTATTGATCC   |        |              |
| NRXN1               | forward  | ATGGGATGGCTTTAGCTGTGACTG   | 54.94  | NM_021767    |
|                     | reversed | TCGTGTACTGGTTCGGTCATTAGG   |        |              |
| NUECLEOLIN          | forward  | CTACACTGGAGAGAAAGGACAAAG   | 53.73  | NM_012749    |
|                     | reversed | GGTTGCTTTCTCGAATACTTCCTG   |        |              |
| PRRX1               | forward  | GGTGGGTGGGATTGGAGGGAAGAC   | 56.01  | NM_153821    |
|                     | reversed | AGCAGGTGACTGACGGAGAAGTTC   |        |              |
| SPERMIDINE          | forward  | CCCGGGAACGAATGAGGAACCAC    | 56.03  | NM_001007667 |
|                     | reversed | GTCCGAGGATGTCAGTGCAGTCAG   |        |              |
| SPP1                | forward  | ACTCGGATGAATCTGACGAATCTC   | 54.94  | NM_012881    |
|                     | reversed | GTCCGAGGATGTCAGTGCAGTCAG   |        |              |
| SPRR1a              | forward  | CTGTCACTCCATCACCATAACCAG   | 55.61  | NM_009264    |
|                     | reversed | GTCACAGCATTGGTAGCACAAGG    |        |              |
| STMN4               | forward  | GAGCCCGAGGACTTTGTGACACTG   | 60.00  | XM_341341    |
|                     | reversed | ACTCGGCCCTTCACTCTGAACTTC   |        |              |
| SUPERVILLIN         | forward  | CCCTTATGCTCCCAAGTTGACATC   | 55.15  | XM_341540    |
|                     | reversed | CCTTTGCTCCGTGTATTCTGAAG    |        |              |
| TPT1                | forward  | GGGCAAACCTGAAGAACAGAAACC   | 54.36  | NM_053867    |
|                     | reversed | AGAGCAACCATGCCATCTGGATTC   |        |              |

Table S2. Validation of select genes with quantitative RT-PCR

| Gene name            | Fold change<br>(Sprouting/Non-sprouting) |
|----------------------|------------------------------------------|
| * <i>IGF-1</i>       | 20.41                                    |
| * <i>OSTEOPONTIN</i> | 12.35                                    |
| * <i>CEACM10</i>     | 8.02                                     |
| * <i>PRRX1</i>       | 8.00                                     |
| * <i>ATRX</i>        | 5.93                                     |
| * <i>CHIMAERIN-1</i> | 5.67                                     |
| * <i>ALCAM</i>       | 4.31                                     |
| * <i>GDF10</i>       | 3.00                                     |
| * <i>SUPERVILLIN</i> | 3.00                                     |
| * <i>NRXN1</i>       | 2.70                                     |
| * <i>MST3B</i>       | 2.37                                     |
| * <i>MELK</i>        | 2.32                                     |
| * <i>SPERMIDINE</i>  | 2.05                                     |
| * <i>GPC3</i>        | 2.00                                     |
| * <i>TPT1</i>        | 1.54                                     |
| <i>LHX9</i>          | 1.11                                     |
| <i>STATHMIN4</i>     | 1.07                                     |
| <i>SPRR1a</i>        | 1.06                                     |
| <i>NgR2</i>          | 1.04                                     |
| <i>NUECLEOLIN</i>    | 0.96                                     |
| <i>FILIP1</i>        | 0.93                                     |
| <i>NgR1</i>          | 0.83                                     |
| <i>NPTN</i>          | 0.79                                     |
| <i>ATF3</i>          | 0.74                                     |
| <i>BTG1</i>          | 0.73                                     |

\*  $P < 0.05$

qRT-PCR was performed for genes differentially regulated in sprouting neurons in aged at day 7 to validate the array results and to test the expression pattern of genes implicated in axonal sprouting in other studies<sup>1-7</sup> but not represented on the array (**Supplementary Table 2**). Fourteen of 21 genes that were upregulated in aged sprouting neurons vs. non-sprouting neurons at day 7 in the array data set are also upregulated by qRT-PCR: *Alcam*, *ATRX*, *Ceacm10*, *Chimearin-1*, *GDF10*, *GPC3*, *IGF-1*, *MELK*, *NRXN1*, *Osteopontin*, *PRXX1*, *Spermidine*, *Supervillin* and *TPT1*. *IGF-1* and *Osteopontin* are the most differentially regulated genes in aged sprouting neurons, with 20- and 12-fold induction compared to the control non-sprouting neurons (**Supplementary Table 2**). *Ceacm10* and *PRRX1* are up-regulated 8-fold in sprouting neurons in aged animal at day 7 after stroke. Six genes that were significantly induced in the array results were not found to be significantly induced by qRT-PCR: *BTG1*, *Filip1*, *LHX9*, *NPTN*, *Nucleolin* and *Stathmin4*. *ATF3* has been implicated in sprouting in dorsal root ganglion cells after lesion<sup>8</sup>. This was not significantly upregulated in the array results, to confirm this we also measured mRNA levels by qRT-PCR and confirmed that this gene is not induced in aged sprouting neurons. *Mst3b* is a serine/threonine kinase implicated in retinal ganglion cell and cortical axonal sprouting<sup>9</sup>. This was not on the array but is significantly upregulated by qRT-PCR. *SPRR1a*, *NgR1* and *NgR2* have been implicated in central or peripheral neuronal sprouting after lesion<sup>4,10,11</sup> and were not on the array. These genes were not significantly upregulated by qRT-PCR. This data validates a majority of the data in the array data set, and further establishes through expression profiling a role for several genes in post-stroke axonal sprouting.

Table S3. Primary antibodies for immunohistochemistry

| <b>Antibody</b> | <b>Species and type</b> | <b>Dilution</b> | <b>Source</b>            | <b>Cat. #</b> |
|-----------------|-------------------------|-----------------|--------------------------|---------------|
| ATRX            | Rabbit polyclonal       | 1:100           | Santa Cruz Biotechnology | sc-15408      |
| CD68            | Rat monoclonal          | 1:60            | Hycult Biotechnology     | HM1070-0708   |
| GDF10           | Rabbit polyclonal       | 1-100           | Abgent                   | AP2069a       |
| GFAP            | Rat monoclonal          | 1:1000          | Invitrogen               | #13-0300      |
| Iba1/AIF1       | Goat polyoclonal        | 1:100           | Abcam                    | ab5076        |
| IGF-1           | Rabbit polyclonal       | 1:100           | Santa Cruz Biotechnology | sc-9013       |
| Lingo-1         | Rabbit polyclonal       | 1:100           | Abcam                    | ab23631       |
| NeuN            | Mouse polyclonal        | 1:200           | Chemicon                 | MAB377B       |
| Osteopontin     | Rabbit polyclonal       | 1:120           | Abcam                    | ab63856       |

**Supplementary Table 4. Genomic profiles of young adult sprouting neurons at 7 day after stroke**

| ProbeName     | GeneName      | Description                                                                                                                                           | LogRatio | pValue  |
|---------------|---------------|-------------------------------------------------------------------------------------------------------------------------------------------------------|----------|---------|
| A_42_P475214  | KCNA1         | Rattus norvegicus potassium voltage-gated channel_ shaker-related subfamily_ member 1 (Kcna1)_ mRNA [NM_173095]                                       | 0.87     | 0.00000 |
| A_43_P12986   | EDG2          | Rattus norvegicus endothelial differentiation_ lysophosphatidic acid G-protein-coupled receptor_ 2 (Edg2)_ mRNA [NM_053936]                           | 0.85     | 0.00140 |
| A_44_P127156  | M55017        | RATNUCIA2 Rat nucleolin gene [M55017]                                                                                                                 | 0.82     | 0.00013 |
| A_43_P11782   | NM_001025291  | Rattus norvegicus myelin basic protein (Mbp)_ transcript variant 1_ mRNA [NM_001025291]                                                               | 0.74     | 0.00466 |
| A_44_P999869  | PTPN11        | Rattus norvegicus protein tyrosine phosphatase_ non-receptor type 11 (Ptpn11)_ mRNA [NM_013088]                                                       | 0.72     | 0.00324 |
| A_44_P510345  | AY539885      | Rattus norvegicus LRRG00134 mRNA_ complete cds. [AY539885]                                                                                            | 0.71     | 0.00100 |
| A_43_P15411   | SLC24A2       | Rattus norvegicus solute carrier family 24 (sodium/potassium/calcium exchanger)_ member 2 (Slc24a2)_ mRNA [NM_031743]                                 | 0.67     | 0.00000 |
| A_43_P15750   | ADN           | PREDICTED: Rattus norvegicus adipsin (Adn)_ mRNA [XM_343169]                                                                                          | 0.66     | 0.00033 |
| A_44_P185355  | BCL11B        | PREDICTED: Rattus norvegicus B-cell leukemia/lymphoma 11B (predicted) (Bcl11b_predicted)_ mRNA [XM_234514]                                            | 0.66     | 0.00002 |
| A_44_P810573  | TC543004      | Unknown                                                                                                                                               | 0.66     | 0.00000 |
| A_44_P1040532 | BF567631      | BF567631 UI-R-BO0-ags-d-02-0-UI.r1 UI-R-BO0 Rattus norvegicus cDNA clone UI-R-BO0-ags-d-02-0-UI 5'_ mRNA sequence [BF567631]                          | 0.65     | 0.00238 |
| A_44_P1023538 | C3            | Rattus norvegicus complement component 3 (C3)_ mRNA [NM_016994]                                                                                       | 0.64     | 0.00358 |
| A_44_P196172  | BEST5         | Rattus norvegicus Best5 protein (Best5)_ mRNA [NM_138881]                                                                                             | 0.64     | 0.00026 |
| A_44_P491796  | SPP1          | Rattus norvegicus secreted phosphoprotein 1 (Spp1)_ mRNA [NM_012881]                                                                                  | 0.63     | 0.00156 |
| A_44_P317773  | PTPN11        | Rattus norvegicus protein tyrosine phosphatase_ non-receptor type 11 (Ptpn11)_ mRNA [NM_013088]                                                       | 0.63     | 0.00043 |
| A_44_P177337  | BF287496      | BF287496 EST452087 Rat Gene Index_ normalized rat_ Rattus norvegicus cDNA Rattus norvegicus cDNA clone RGIGG75_ mRNA sequence [BF287496]              | 0.62     | 0.00412 |
| A_44_P1039128 | CXCL10        | Rattus norvegicus chemokine (C-X-C motif) ligand 10 (Cxcl10)_ mRNA [NM_139089]                                                                        | 0.62     | 0.00278 |
| A_44_P1008867 | NETO2         | PREDICTED: Rattus norvegicus neuropilin (NRP) and tolloid (TLL)-like 2 (predicted) (Neto2_predicted)_ mRNA [XM_226349]                                | 0.62     | 0.00032 |
| A_43_P15819   | PRSS22        | Rattus norvegicus similar to serine protease (LOC302971)_ mRNA [XM_220222]                                                                            | 0.62     | 0.00000 |
| A_44_P530431  | BF567797      | BF567797 UI-R-BO0-ahm-b-08-0-UI.r1 UI-R-BO0 Rattus norvegicus cDNA clone UI-R-BO0-ahm-b-08-0-UI 5'_ mRNA sequence [BF567797]                          | 0.61     | 0.00388 |
| A_42_P510386  | SERPING1      | Rattus norvegicus serine (or cysteine) peptidase inhibitor_ clade G_ member 1 (Serping1)_ mRNA [NM_199093]                                            | 0.61     | 0.00247 |
| A_43_P22577   | XM_575365     | PREDICTED: Rattus norvegicus similar to OEF2 (LOC500011)_ mRNA [XM_575365]                                                                            | 0.61     | 0.00003 |
| A_44_P379331  | LOC257642     | Rattus norvegicus rRNA promoter binding protein (LOC257642)_ mRNA [NM_147136]                                                                         | 0.6      | 0.00414 |
| A_44_P590658  | ENSRNOT000000 | Unknown                                                                                                                                               | 0.6      | 0.00001 |
| A_44_P1034201 | XM_341176     | Rattus norvegicus similar to Lamb3 protein (LOC360901)_ mRNA [XM_341176]                                                                              | 0.59     | 0.00013 |
| A_44_P793461  | TC560122      | Unknown                                                                                                                                               | 0.59     | 0.00002 |
| A_44_P377681  | NM_001025002  | Rattus norvegicus hypothetical protein LOC310926 (LOC310926)_ mRNA [NM_001025002]                                                                     | 0.58     | 0.00095 |
| A_44_P148776  | BF290343      | BF290343 EST454934 Rat Gene Index_ normalized rat_ Rattus norvegicus cDNA Rattus norvegicus cDNA clone RGIHV17 5'_ sequence_ mRNA sequence [BF290343] | 0.57     | 0.00058 |
| A_44_P209149  | MYO5A         | Rattus norvegicus myosin Va (Myo5a)_ mRNA [NM_022178]                                                                                                 | 0.56     | 0.00242 |
| A_44_P333811  | BF289769      | BF289769 EST454360 Rat Gene Index_ normalized rat_ Rattus norvegicus cDNA Rattus norvegicus cDNA clone RGIHK82_ mRNA sequence [BF289769]              | 0.56     | 0.00213 |
| A_44_P271442  | MYH3          | Rattus norvegicus myosin_ heavy polypeptide 3_ skeletal muscle_ embryonic (Myh3)_ mRNA [NM_012604]                                                    | 0.56     | 0.00057 |
| A_44_P226941  | PLN           | Rattus norvegicus phospholamban (Pln)_ mRNA [NM_022707]                                                                                               | 0.56     | 0.00029 |
| A_44_P448864  | APC           | Rattus norvegicus adenomatosis polyposis coli (Apc)_ mRNA [NM_012499]                                                                                 | 0.56     | 0.00004 |
| A_44_P182671  | FAM34A        | Rattus norvegicus similar to hypothetical protein LOC226856 (LOC360898)_ mRNA [XM_341172]                                                             | 0.55     | 0.00004 |
| A_44_P280659  | RGD1305110    | PREDICTED: Rattus norvegicus similar to KIAA1841 protein (predicted) (LOC305579)_ mRNA [XM_223682]                                                    | 0.55     | 0.00000 |
| A_44_P219481  | RABEP1        | Rattus norvegicus rabaptin 5 (Rabep1)_ mRNA [NM_019124]                                                                                               | 0.54     | 0.00068 |
| A_44_P828123  | CO393245      | AGENCOURT_26756198 NIH_MGC_255 Rattus norvegicus cDNA clone IMAGE:7319527 5'_ mRNA sequence [CO393245]                                                | 0.54     | 0.00013 |
| A_44_P243134  | MTAP2         | Rattus norvegicus microtubule-associated protein 2 (Mtap2)_ mRNA [NM_013066]                                                                          | 0.53     | 0.00162 |
| A_44_P547586  | AW915407      | AW915407 EST346711 Normalized rat embryo_ Bento Soares Rattus sp. cDNA clone RGICV10 5'_ end_ mRNA sequence [AW915407]                                | 0.53     | 0.00060 |
| A_44_P346637  | PCP4          | Rattus norvegicus Purkinje cell protein 4 (Pcp4)_ mRNA [NM_013002]                                                                                    | 0.53     | 0.00051 |
| A_44_P390086  | RAB2          | Rattus norvegicus RAB2_ member RAS oncogene family (Rab2)_ mRNA [NM_031718]                                                                           | 0.53     | 0.00004 |

|               |                     |                                                                                                                                                              |      |         |
|---------------|---------------------|--------------------------------------------------------------------------------------------------------------------------------------------------------------|------|---------|
| A_44_P475587  | <u>ELAVL1</u>       | PREDICTED: Rattus norvegicus ELAV (embryonic lethal_ abnormal vision_ Drosophila)-like 1 (Hu antigen R) (predicted) (Elavl1_predicted)_ mRNA [XM_344063]     | 0.53 | 0.00003 |
| A_43_P18992   | <u>RGD1310433</u>   | PREDICTED: Rattus norvegicus similar to mKIAA1757 protein (predicted) (LOC297514)_ mRNA [XM_238368]                                                          | 0.53 | 0.00003 |
| A_44_P303796  | <u>AA851329</u>     | AA851329 EST194097 Normalized rat placenta_ Bento Soares Rattus sp. cDNA clone RPLAF30 3' end_ mRNA sequence [AA851329]                                      | 0.52 | 0.00136 |
| A_44_P1036480 | <u>LOC307671</u>    | PREDICTED: Rattus norvegicus similar to HBxAg transactivated protein 2 (LOC307671)_ mRNA [XM_226278]                                                         | 0.52 | 0.00011 |
| A_44_P776209  | <u>TC535936</u>     | Unknown                                                                                                                                                      | 0.52 | 0.00002 |
| A_44_P1036513 | <u>RGD1566117</u>   | PREDICTED: Rattus norvegicus similar to hypothetical protein FLJ23033 (LOC310982)_ mRNA [XM_227828]                                                          | 0.51 | 0.00118 |
| A_44_P447650  | <u>ADARB1</u>       | Rattus norvegicus adenosine deaminase_ RNA-specific_ B1 (Adarb1)_ mRNA [NM_012894]                                                                           | 0.51 | 0.00099 |
| A_44_P439475  | <u>KLF7</u>         | PREDICTED: Rattus norvegicus Kruppel-like factor 7 (ubiquitous) (predicted) (Klf7_predicted)_ mRNA [XM_343581]                                               | 0.51 | 0.00059 |
| A_44_P175846  | <u>LOC307671</u>    | PREDICTED: Rattus norvegicus similar to HBxAg transactivated protein 2 (LOC307671)_ mRNA [XM_226278]                                                         | 0.51 | 0.00006 |
| A_44_P1036481 | <u>RGD1566064</u>   | PREDICTED: Rattus norvegicus similar to KIAA1096 protein (LOC360865)_ mRNA [XM_341141]                                                                       | 0.51 | 0.00005 |
| A_44_P896682  | <u>BC107473</u>     | Rattus norvegicus cDNA clone IMAGE:7445191 [BC107473]                                                                                                        | 0.51 | 0.00001 |
| A_44_P186336  | <u>RAB15</u>        | Sprague-Dawley (clone LRB9) RAB15 mRNA_ complete cds. [M83679]                                                                                               | 0.5  | 0.00042 |
| A_42_P514501  | <u>GRM3</u>         | Rat metabotropic glutamate receptor 3 mRNA_ primary transcript. [M92076]                                                                                     | 0.5  | 0.00021 |
| A_44_P559401  | <u>SCG3</u>         | Rattus norvegicus secretogranin III (Scg3)_ mRNA [NM_053856]                                                                                                 | 0.5  | 0.00002 |
| A_44_P763434  | <u>XM_576579</u>    | PREDICTED: Rattus norvegicus similar to novel protein (LOC501153)_ mRNA [XM_576579]                                                                          | 0.5  | 0.00001 |
| A_44_P218284  | <u>XM_573199</u>    | PREDICTED: Rattus norvegicus similar to Dual specificity protein phosphatase 3 (T-DSP11) (LOC498003)_ mRNA [XM_573199]                                       | 0.5  | 0.00000 |
| A_44_P231457  | <u>KCNA1</u>        | Rattus norvegicus potassium voltage-gated channel_ shaker-related subfamily_ member 1 (Kcna1)_ mRNA [NM_173095]                                              | 0.5  | 0.00000 |
| A_44_P517614  | <u>ALS2CR3</u>      | Rattus norvegicus amyotrophic lateral sclerosis 2 (juvenile) chromosome region_ candidate 3 homolog (human) (Als2cr3)_ mRNA [NM_133560]                      | 0.5  | 0.00000 |
| A_44_P328864  | <u>XM_573294</u>    | PREDICTED: Rattus norvegicus similar to hypothetical protein A (LOC498088)_ mRNA [XM_573294]                                                                 | 0.5  | 0.00000 |
| A_44_P220378  | <u>RGD1306314</u>   | PREDICTED: Rattus norvegicus similar to KIAA0819 protein (predicted) (LOC312683)_ mRNA [XM_232253]                                                           | 0.49 | 0.00478 |
| A_44_P417303  | <u>RGD1560784</u>   | Rattus norvegicus similar to hypothetical protein MGC31104 (LOC363449)_ mRNA [XM_343770]                                                                     | 0.49 | 0.00378 |
| A_44_P554928  | <u>GAD2</u>         | Rattus norvegicus glutamic acid decarboxylase 2 (Gad2)_ mRNA [NM_012563]                                                                                     | 0.49 | 0.00274 |
| A_44_P137215  | <u>BM986231</u>     | BM986231 EST531685 Rat gene index_ normalized rat_ norvegicus Rattus norvegicus cDNA clone RGIAB40 3' end similar to ribosomal RNA_ mRNA sequence [BM986231] | 0.49 | 0.00120 |
| A_44_P400147  | <u>ADD3</u>         | Rattus norvegicus adducin 3 (gamma) (Add3)_ mRNA [NM_031552]                                                                                                 | 0.49 | 0.00005 |
| A_44_P215898  | <u>XM_212703</u>    | Rattus norvegicus similar to cell division cycle 10 homolog (LOC288347)_ mRNA [XM_212703]                                                                    | 0.49 | 0.00000 |
| A_44_P254503  | <u>AA800034</u>     | AA800034 EST189531 Normalized rat heart_ Bento Soares Rattus sp. cDNA clone RHEAI63 3' end_ mRNA sequence [AA800034]                                         | 0.49 | 0.00000 |
| A_44_P409022  | <u>AI178706</u>     | AI178706 EST222387 Normalized rat placenta_ Bento Soares Rattus sp. cDNA clone RPLCU55 3' end_ mRNA sequence [AI178706]                                      | 0.48 | 0.00238 |
| A_44_P762670  | <u>A_44_P762670</u> | Unknown                                                                                                                                                      | 0.48 | 0.00091 |
| A_44_P607486  | <u>CHES1</u>        | PREDICTED: Rattus norvegicus checkpoint suppressor 1 (predicted) (Ches1_predicted)_ mRNA [XM_234377]                                                         | 0.48 | 0.00031 |
| A_44_P745617  | <u>TC558054</u>     | Unknown                                                                                                                                                      | 0.48 | 0.00017 |
| A_44_P408887  | <u>ALS2CR3</u>      | Rattus norvegicus amyotrophic lateral sclerosis 2 (juvenile) chromosome region_ candidate 3 homolog (human) (Als2cr3)_ mRNA [NM_133560]                      | 0.48 | 0.00006 |
| A_44_P472954  | <u>MYH3</u>         | Rattus norvegicus myosin_ heavy polypeptide 3_ skeletal muscle_ embryonic (Myh3)_ mRNA [NM_012604]                                                           | 0.48 | 0.00005 |
| A_44_P409336  | <u>U56261</u>       | Rattus norvegicus SNAP-25a mRNA_ partial cds. [U56261]                                                                                                       | 0.48 | 0.00002 |
| A_44_P306368  | <u>LIP1</u>         | Rattus norvegicus lysosomal acid lipase 1 (Lip1)_ mRNA [NM_012732]                                                                                           | 0.48 | 0.00000 |
| A_44_P592983  | <u>TC541993</u>     | Unknown                                                                                                                                                      | 0.47 | 0.00450 |
| A_44_P465329  | <u>MAL</u>          | Rattus norvegicus myelin and lymphocyte protein (Mal)_ mRNA [NM_012798]                                                                                      | 0.47 | 0.00278 |
| A_43_P10353   | <u>XM_574906</u>    | PREDICTED: Rattus norvegicus similar to Eif4g1 protein (LOC499581)_ mRNA [XM_574906]                                                                         | 0.47 | 0.00277 |
| A_44_P435422  | <u>NM_001014035</u> | Rattus norvegicus similar to myocyte enhancer factor 2C (LOC309957)_ mRNA [NM_001014035]                                                                     | 0.47 | 0.00230 |
| A_44_P210235  | <u>HNRPR</u>        | Rattus norvegicus heterogeneous nuclear ribonucleoprotein R (Hnrpr)_ mRNA [NM_175603]                                                                        | 0.47 | 0.00201 |
| A_43_P20704   | <u>DST</u>          | PREDICTED: Rattus norvegicus dystonin (predicted) (Dst_predicted)_ mRNA [XM_237042]                                                                          | 0.47 | 0.00077 |
| A_43_P17545   | <u>XM_576047</u>    | PREDICTED: Rattus norvegicus similar to LOC398632 protein (LOC500670)_ mRNA [XM_576047]                                                                      | 0.47 | 0.00076 |
| A_44_P592538  | <u>DN934259</u>     | AGENCOURT_50143130 NCI_CGAP_Pr50 Rattus norvegicus cDNA clone IMAGE:7939133 5'_ mRNA sequence [DN934259]                                                     | 0.47 | 0.00065 |
| A_44_P361741  | <u>Z-SEP</u>        | Rattus norvegicus septin 7 (Sept7)_ mRNA [NM_022616]                                                                                                         | 0.47 | 0.00013 |

|               |                      |                                                                                                                                       |      |         |
|---------------|----------------------|---------------------------------------------------------------------------------------------------------------------------------------|------|---------|
| A_44_P146833  | <u>GRM3</u>          | PREDICTED: Rattus norvegicus glutamate receptor_ metabotropic 3 (Grm3)_ mRNA [XM_342626]                                              | 0.47 | 0.00001 |
| A_44_P532754  | <u>PBX3</u>          | PREDICTED: Rattus norvegicus pre B-cell leukemia transcription factor 3 (predicted) (Pbx3_predicted)_ mRNA [XM_231158]                | 0.46 | 0.00162 |
| A_42_P522638  | <u>NM_001034952</u>  | Rattus norvegicus similar to RIKEN cDNA E030024M05 (RGD1306818)_ mRNA [NM_001034952]                                                  | 0.46 | 0.00030 |
| A_44_P114308  | <u>HSPCA</u>         | Rattus norvegicus heat shock protein 1_ alpha (Hspca)_ mRNA [NM_175761]                                                               | 0.46 | 0.00028 |
| A_44_P275145  | <u>KIF1A</u>         | PREDICTED: Rattus norvegicus kinesin family member 1A (predicted) (Kif1a_predicted)_ mRNA [XM_343630]                                 | 0.46 | 0.00019 |
| A_43_P20703   | <u>GDAP1</u>         | PREDICTED: Rattus norvegicus ganglioside-induced differentiation-associated-protein 1 (predicted) (Gdap1_predicted)_ mRNA [XM_232577] | 0.46 | 0.00002 |
| A_44_P445004  | <u>SLC4A4</u>        | Rattus norvegicus solute carrier family 4_ member 4 (Slc4a4)_ mRNA [NM_053424]                                                        | 0.45 | 0.00469 |
| A_44_P139876  | <u>MYH8</u>          | Rat embryonic myosin heavy chain gene_ partial 5' region_ mRNA. [K02111]                                                              | 0.45 | 0.00274 |
| A_44_P752274  | <u>A_44_P752274</u>  | Unknown                                                                                                                               | 0.45 | 0.00024 |
| A_44_P1018684 | <u>XM_573584</u>     | PREDICTED: Rattus norvegicus similar to signal recognition particle_72 kDa subunit (LOC498351)_ mRNA [XM_573584]                      | 0.45 | 0.00000 |
| A_43_P14683   | <u>NM_001024790</u>  | Rattus norvegicus ubiquitin specific protease 7 (herpes virus-associated) (Usp7)_ mRNA [NM_001024790]                                 | 0.44 | 0.00402 |
| A_44_P760131  | <u>A_44_P760131</u>  | Unknown                                                                                                                               | 0.44 | 0.00049 |
| A_44_P236071  | <u>AY383668</u>      | Rattus norvegicus LRRGT00013 mRNA_ complete cds. [AY383668]                                                                           | 0.44 | 0.00046 |
| A_44_P305073  | <u>ATP6V1A1</u>      | Rattus norvegicus similar to ATPase_ H+ transporting_ V1 subunit A_ isoform 1 (LOC360716)_ mRNA [XM_340987]                           | 0.44 | 0.00000 |
| A_42_P638128  | <u>ACTG2</u>         | Rattus norvegicus actin_ gamma 2 (Actg2)_ mRNA [NM_012893]                                                                            | 0.44 | 0.00000 |
| A_44_P318999  | <u>A_44_P318999</u>  | Unknown                                                                                                                               | 0.44 | 0.00000 |
| A_44_P821788  | <u>ENSRNOT000000</u> | Unknown                                                                                                                               | 0.44 | 0.00000 |
| A_44_P740179  | <u>AI180087</u>      | AI180087 EST223823 Normalized rat spleen_ Bento Soares Rattus sp. cDNA clone RSPCP89 3' end_ mRNA sequence [AI180087]                 | 0.43 | 0.00483 |
| A_44_P547385  | <u>AA899649</u>      | AA899649 UI-R-E0-dg-h-07-0-UI.s1 UI-R-E0 Rattus norvegicus cDNA clone UI-R-E0-dg-h-07-0-UI 3' similar to gi [AA899649]                | 0.43 | 0.00059 |
| A_44_P144188  | <u>SYT12</u>         | Rattus norvegicus synaptotagmin 12 (Syt12)_ mRNA [NM_138835]                                                                          | 0.43 | 0.00038 |
| A_44_P287803  | <u>AA996470</u>      | AA996470 UI-R-C0-hi-g-08-0-UI.s1 UI-R-C0 Rattus norvegicus cDNA clone UI-R-C0-hi-g-08-0-UI 3'_ mRNA sequence [AA996470]               | 0.43 | 0.00010 |
| A_44_P930637  | <u>CPEB2</u>         | PREDICTED: Rattus norvegicus cytoplasmic polyadenylation element binding protein 2 (predicted) (Cpeb2_predicted)_ mRNA [XM_341227]    | 0.43 | 0.00000 |
| A_44_P500880  | <u>APP</u>           | Rattus norvegicus amyloid beta (A4) precursor protein (App)_ mRNA [NM_019288]                                                         | 0.43 | 0.00000 |
| A_43_P11980   | <u>RASGRP1</u>       | Rattus norvegicus RAS guanyl releasing protein 1 (Rasgrp1)_ mRNA [NM_019211]                                                          | 0.43 | 0.00000 |
| A_44_P1012591 | <u>OSBPL1A</u>       | Rattus norvegicus oxysterol binding protein-like 1A (Osbp1a)_ mRNA [NM_172023]                                                        | 0.42 | 0.00431 |
| A_44_P1041179 | <u>EP400</u>         | PREDICTED: Rattus norvegicus E1A binding protein p400 (predicted) (Ep400_predicted)_ mRNA [XM_222251]                                 | 0.42 | 0.00359 |
| A_44_P516074  | <u>RGD1565496</u>    | PREDICTED: Rattus norvegicus similar to Butyrate-induced transcript 1 (LOC300783)_ mRNA [XM_217180]                                   | 0.42 | 0.00322 |
| A_44_P439473  | <u>KLF7</u>          | PREDICTED: Rattus norvegicus Kruppel-like factor 7 (ubiquitous) (predicted) (Klf7_predicted)_ mRNA [XM_343581]                        | 0.42 | 0.00264 |
| A_44_P291770  | <u>AI234040</u>      | AI234040 EST230728 Normalized rat lung_ Bento Soares Rattus sp. cDNA clone RLUCU43 3' end_ mRNA sequence [AI234040]                   | 0.42 | 0.00223 |
| A_44_P953424  | <u>A_44_P953424</u>  | Unknown                                                                                                                               | 0.42 | 0.00189 |
| A_44_P344560  | <u>RGD1310358</u>    | PREDICTED: Rattus norvegicus similar to NNX3 (predicted) (LOC308537)_ mRNA [XM_218532]                                                | 0.42 | 0.00112 |
| A_44_P255934  | <u>USP32</u>         | PREDICTED: Rattus norvegicus ubiquitin specific protease 32 (predicted) (Usp32_predicted)_ mRNA [XM_220798]                           | 0.42 | 0.00065 |
| A_44_P838788  | <u>CB578247</u>      | AMGNNUC:NRHY5-00132-E2-A W Rat hypothalamus (10471) Rattus norvegicus cDNA clone nrhy5-00132-e2 5'_ mRNA sequence [CB578247]          | 0.42 | 0.00063 |
| A_44_P324155  | <u>RGD1309701</u>    | PREDICTED: Rattus norvegicus similar to RIKEN cDNA 9130005N14 (predicted) (LOC316729)_ mRNA [XM_237514]                               | 0.42 | 0.00053 |
| A_44_P328311  | <u>A_44_P328311</u>  | Unknown                                                                                                                               | 0.42 | 0.00052 |
| A_44_P831621  | <u>CB327359</u>      | UI-R-FS0-crs-d-09-0-UI.s1 UI-R-FS0 Rattus norvegicus cDNA clone UI-R-FS0-crs-d-09-0-UI 3'_ mRNA sequence [CB327359]                   | 0.42 | 0.00025 |
| A_44_P413294  | <u>CPLX1</u>         | Rattus norvegicus complexin 1 (Cplx1)_ mRNA [NM_022864]                                                                               | 0.42 | 0.00020 |
| A_44_P542390  | <u>PTPRD</u>         | Rattus norvegicus protein tyrosine phosphatase_ receptor type_ D (Ptprd)_ mRNA [NM_019140]                                            | 0.42 | 0.00010 |
| A_44_P424188  | <u>RGD1308448</u>    | PREDICTED: Rattus norvegicus similar to RIKEN cDNA B130016O10 gene (predicted) (LOC310358)_ mRNA [XM_227078]                          | 0.42 | 0.00002 |
| A_44_P410331  | <u>AMDP2</u>         | Rattus norvegicus similar to S-adenosylmethionine decarboxylase proenzyme (AdoMetDC) (SamDC) (LOC309358)_ mRNA [XM_219839]            | 0.42 | 0.00000 |
| A_44_P459249  | <u>SRP72</u>         | PREDICTED: Rattus norvegicus signal recognition particle 72 (predicted) (Srp72_predicted)_ mRNA [XM_214017]                           | 0.42 | 0.00000 |
| A_42_P461587  | <u>NGFB_MAPPED</u>   | PREDICTED: Rattus norvegicus nerve growth factor_ beta (Ngfb)_ mRNA [XM_227525]                                                       | 0.41 | 0.00498 |
| A_43_P16664   | <u>RGD1311899</u>    | Rattus norvegicus similar to RIKEN cDNA 2210016L21 gene (RGD1311899)_ mRNA [NM_001009630]                                             | 0.41 | 0.00456 |

|               |              |                                                                                                                                                                                     |      |         |
|---------------|--------------|-------------------------------------------------------------------------------------------------------------------------------------------------------------------------------------|------|---------|
| A 44 P425450  | AI535429     | AI535429 UI-R-C3-si-h-11-0-UI.s1 UI-R-C3 Rattus norvegicus cDNA clone UI-R-C3-si-h-11-0-UI 3' mRNA sequence [AI535429]                                                              | 0.41 | 0.00361 |
| A 44 P149114  | ATPV61B2     | Rattus norvegicus ATPase_H+ transporting_V1 subunit B_isoform 2 (Atp6v1b2)_ mRNA [NM_057213]                                                                                        | 0.41 | 0.00206 |
| A 44 P520992  | BQ782274     | BQ782274 UI-R-FF0-cpj-n-03-0-UI.s1 NCI_CGAP_FF0 Rattus norvegicus cDNA clone UI-R-FF0-cpj-n-03-0-UI 3' mRNA sequence [BQ782274]                                                     | 0.41 | 0.00020 |
| A 44 P899961  | TC540586     | CTOG_HUMAN (Q14008) CH-TOG protein (Colonic and hepatic tumor over-expressed protein)_ partial (7%) [TC540586]                                                                      | 0.41 | 0.00018 |
| A 42 P626895  | TPD52L1      | Rattus norvegicus similar to tumor protein D53 (LOC361461)_ mRNA [XM_341740]                                                                                                        | 0.41 | 0.00006 |
| A 44 P227655  | AI171249     | AI171249 EST217204 Normalized rat muscle_Bento Soares Rattus sp. cDNA clone RMUBI12 3' end_ mRNA sequence [AI171249]                                                                | 0.41 | 0.00000 |
| A 44 P118666  | HS3ST1       | Rattus norvegicus heparan sulfate (glucosamine) 3-O-sulfotransferase 1 (Hs3st1)_ mRNA [NM_053391]                                                                                   | 0.41 | 0.00000 |
| A 44 P331567  | STIM2        | PREDICTED: Rattus norvegicus stromal interaction molecule 2 (predicted) (Stim2_predicted)_ mRNA [XM_223454]                                                                         | 0.41 | 0.00000 |
| A 43 P17088   | RGD1306405   | PREDICTED: Rattus norvegicus similar to 1-acylglycerolphosphate acyltransferase-epsilon (predicted) (LOC306582)_ mRNA [XM_224993]                                                   | 0.4  | 0.00240 |
| A 44 P494644  | TSPYL4       | Rattus norvegicus TSPY-like 4 (Tspyl4)_ mRNA [NM_001012075]                                                                                                                         | 0.4  | 0.00123 |
| A 44 P217452  | TGOLN2       | Rattus norvegicus trans-golgi network protein 1 (Tgoln2)_ mRNA [NM_138840]                                                                                                          | 0.4  | 0.00028 |
| A 44 P142194  | S68987       | set=Set beta isoform [alternatively spliced] [rats_neonatal kidney_ mRNA_ 2026 nt]. [S68987]                                                                                        | 0.4  | 0.00016 |
| A 44 P849277  | AI137972     | AI137972 UI-R-C0-hn-d-01-0-UI.s1 UI-R-C0 Rattus norvegicus cDNA clone UI-R-C0-hn-d-01-0-UI 3' mRNA sequence [AI137972]                                                              | 0.4  | 0.00000 |
| A 44 P825985  | TC543892     | Unknown                                                                                                                                                                             | 0.39 | 0.00460 |
| A 44 P137217  | BM986231     | BM986231 EST531685 Rat gene index_normalized rat_norvegicus Rattus norvegicus cDNA clone RGIAB40 3' end similar to ribosomal RNA_ mRNA sequence [BM986231]                          | 0.39 | 0.00306 |
| A 43 P19830   | YTHDF2       | PREDICTED: Rattus norvegicus YTH domain family 2 (predicted) (Ythdf2_predicted)_ mRNA [XM_232772]                                                                                   | 0.39 | 0.00271 |
| A 44 P396546  | HSPA8        | Rattus norvegicus heat shock protein 8 (Hspa8)_ mRNA [NM_024351]                                                                                                                    | 0.39 | 0.00238 |
| A 44 P443138  | A 44 P443138 | Unknown                                                                                                                                                                             | 0.39 | 0.00238 |
| A 44 P959683  | XM_576263    | PREDICTED: Rattus norvegicus similar to RIKEN cDNA B230382K22 gene (LOC500864)_ mRNA [XM_576263]                                                                                    | 0.39 | 0.00160 |
| A 44 P205887  | RAB14        | Rattus norvegicus RAB14_member RAS oncogene family (Rab14)_ mRNA [NM_053589]                                                                                                        | 0.39 | 0.00079 |
| A 44 P387680  | CB547362     | CB547362 AMGNNUC:SRPB2-00294-C2-A srpb2 (10220) Rattus norvegicus cDNA clone srpb2-00294-c2 5' mRNA sequence [CB547362]                                                             | 0.39 | 0.00046 |
| A 44 P152134  | XM_226292    | Rattus norvegicus similar to RIKEN cDNA 1700081O22 (LOC307687)_ mRNA [XM_226292]                                                                                                    | 0.39 | 0.00010 |
| A 44 P245636  | STRBP        | Rattus norvegicus double-stranded RNA-binding protein p74 (Strbp)_ mRNA [NM_053416]                                                                                                 | 0.39 | 0.00001 |
| A 44 P191021  | PHYH         | Rattus norvegicus phytanoyl-CoA hydroxylase (Phyh)_ mRNA [NM_053674]                                                                                                                | 0.39 | 0.00000 |
| A 44 P283758  | RGD1560876   | PREDICTED: Rattus norvegicus similar to hypothetical protein MGC48915 (LOC364395)_ mRNA [XM_344414]                                                                                 | 0.38 | 0.00492 |
| A 44 P836925  | XM_573978    | PREDICTED: Rattus norvegicus similar to hypothetical protein (LOC364670)_ mRNA [XM_573978]                                                                                          | 0.38 | 0.00313 |
| A 44 P1048487 | ZFYVE9       | PREDICTED: Rattus norvegicus zinc finger_FYVE domain containing 9 (predicted) (Zfyve9_predicted)_ mRNA [XM_233341]                                                                  | 0.38 | 0.00109 |
| A 44 P414469  | HADHA        | Rattus norvegicus hydroxyacyl-Coenzyme A dehydrogenase/3-ketoacyl-Coenzyme A thiolase/enoyl-Coenzyme A hydratase (trifunctional protein)_ alpha subunit (Hadha)_ mRNA [NM_130826]   | 0.38 | 0.00021 |
| A 44 P265682  | XM_573823    | PREDICTED: Rattus norvegicus similar to A-kinase anchor protein 11 (Protein kinase A anchoring protein 11) (PRKA11) (A kinase anchor protein 220 kDa) (AKAP 220) (hAKAP220) (LOC498 | 0.38 | 0.00013 |
| A 44 P248495  | XM_229809    | Rattus norvegicus similar to RIKEN cDNA 1700081O22 (LOC317101)_ mRNA [XM_229809]                                                                                                    | 0.38 | 0.00007 |
| A 44 P285849  | KIF5C        | PREDICTED: Rattus norvegicus kinesin family member 5C (predicted) (Kif5c_predicted)_ mRNA [XM_241981]                                                                               | 0.38 | 0.00001 |
| A 44 P515349  | PIK3R1       | Rattus norvegicus phosphatidylinositol 3-kinase_regulatory subunit polypeptide 1 (Pik3r1)_ mRNA [NM_013005]                                                                         | 0.38 | 0.00000 |
| A 44 P1011512 | NM_031805    | Rattus norvegicus ankyrin 3_epithelial (Ank3)_ transcript variant 1_ mRNA [NM_031805]                                                                                               | 0.37 | 0.00292 |
| A 44 P895064  | AW915474     | AW915474 EST346778 Normalized rat embryo_Bento Soares Rattus sp. cDNA clone RGICV78 5' end_ mRNA sequence [AW915474]                                                                | 0.37 | 0.00185 |
| A 44 P526866  | KLF5         | Rattus norvegicus Kruppel-like factor 5 (Klf5)_ mRNA [NM_053394]                                                                                                                    | 0.37 | 0.00185 |
| A 44 P351301  | PA2G4        | Rattus norvegicus proliferation-associated 2G4 (Pa2g4)_ mRNA [NM_001004206]                                                                                                         | 0.37 | 0.00183 |
| A 44 P368679  | BF283449     | BF283449 EST448040 Rat Gene Index_normalized rat_Rattus norvegicus cDNA Rattus norvegicus cDNA clone RGIEC16 3' sequence_ mRNA sequence [BF283449]                                  | 0.37 | 0.00143 |
| A 44 P361487  | NM_001013853 | Rattus norvegicus globin_alpha (LOC287167)_ mRNA [NM_001013853]                                                                                                                     | 0.37 | 0.00141 |
| A 44 P297100  | QKI          | PREDICTED: Rattus norvegicus similar to QUAKING isoform 6 (LOC499022)_ mRNA [XM_574316]                                                                                             | 0.37 | 0.00136 |
| A 44 P335165  | DDX6_MAPPED  | PREDICTED: Rattus norvegicus DEAD (Asp-Glu-Ala-Asp) box polypeptide 6 (Ddx6)_ mRNA [XM_236192]                                                                                      | 0.37 | 0.00136 |
| A 42 P694679  | HDAC4        | PREDICTED: Rattus norvegicus histone deacetylase 4 (predicted) (Hdac4_predicted)_ mRNA [XM_343629]                                                                                  | 0.37 | 0.00094 |
| A 44 P167205  | AI229849     | AI229849 EST226544 Normalized rat embryo_Bento Soares Rattus sp. cDNA clone REMCN39 3' end_ mRNA sequence [AI229849]                                                                | 0.37 | 0.00089 |
| A 43 P18842   | ARRDC3       | Rattus norvegicus arrestin domain containing 3 (Arrdc3)_ mRNA [NM_001007797]                                                                                                        | 0.37 | 0.00060 |



|               |               |                                                                                                                                                                                       |      |         |
|---------------|---------------|---------------------------------------------------------------------------------------------------------------------------------------------------------------------------------------|------|---------|
| A_44_P556912  | AI102076      | AI102076 EST211365 Normalized rat brain_Bento Soares Rattus sp. cDNA clone RBRBY61 3' end_mRNA sequence [AI102076]                                                                    | 0.37 | 0.00054 |
| A_44_P432139  | RPL5          | Rattus norvegicus ribosomal protein L5 (Rpl5)_mRNA [NM_031099]                                                                                                                        | 0.37 | 0.00052 |
| A_44_P213426  | NM_001024371  | Rattus norvegicus neurocalcin delta (Ncald)_mRNA [NM_001024371]                                                                                                                       | 0.37 | 0.00045 |
| A_44_P531891  | MADD          | Rattus norvegicus MAP-kinase activating death domain (Madd)_mRNA [NM_053585]                                                                                                          | 0.37 | 0.00041 |
| A_44_P103127  | LOC302199     | PREDICTED: Rattus norvegicus similar to spermatogenesis associated glutamate (E)-rich protein 4d (LOC302199)_mRNA [XM_217542]                                                         | 0.37 | 0.00031 |
| A_44_P111941  | PTPRE         | PREDICTED: Rattus norvegicus protein tyrosine phosphatase_receptor type_E (Ptpre)_mRNA [XM_341950]                                                                                    | 0.37 | 0.00009 |
| A_44_P328654  | XM_578956     | PREDICTED: Rattus norvegicus similar to Myosin IXb (Unconventional myosin-9b) (LOC503417)_mRNA [XM_578956]                                                                            | 0.37 | 0.00008 |
| A_44_P863776  | AW143280      | EST293576 Normalized rat brain_Bento Soares Rattus sp. cDNA clone RGIBJ34 5' end_mRNA sequence [AW143280]                                                                             | 0.37 | 0.00004 |
| A_44_P534196  | RGD1310950    | PREDICTED: Rattus norvegicus similar to KIAA1078 protein (predicted) (LOC289400)_mRNA [XM_213983]                                                                                     | 0.37 | 0.00001 |
| A_44_P538531  | PITPNB        | Rattus norvegicus phosphatidylinositol transfer protein_beta (Pitpnb)_mRNA [NM_053742]                                                                                                | 0.37 | 0.00000 |
| A_44_P363805  | LOC367108     | Rattus norvegicus similar to 40S ribosomal protein S7 (S8) (LOC367108)_mRNA [XM_345950]                                                                                               | 0.36 | 0.00467 |
| A_42_P784541  | MPV17L        | PREDICTED: Rattus norvegicus Mpv17 transgene_kidney disease mutant-like (predicted) (Mpv17l_predicted)_mRNA [XM_340739]                                                               | 0.36 | 0.00384 |
| A_44_P508462  | ANP32B        | Rattus norvegicus acidic nuclear phosphoprotein 32 family_member B (Anp32b)_mRNA [NM_131911]                                                                                          | 0.36 | 0.00355 |
| A_44_P120890  | CA509273      | CA509273 UI-R-F50-cqr-i-23-0-UI.s1 NCI_CGAP_F50 Rattus norvegicus cDNA clone IMAGE:7357249 3'_mRNA sequence [CA509273]                                                                | 0.36 | 0.00348 |
| A_44_P958005  | AA963087      | AA963087 UI-R-E1-fx-b-09-0-UI.s1 UI-R-E1 Rattus norvegicus cDNA clone UI-R-E1-fx-b-09-0-UI 3'_mRNA sequence [AA963087]                                                                | 0.36 | 0.00228 |
| A_43_P12467   | PDE1A         | Rattus norvegicus phosphodiesterase 1A_calmodulin-dependent (Pde1a)_mRNA [NM_030871]                                                                                                  | 0.36 | 0.00211 |
| A_44_P540660  | C3ORF6H       | Rattus norvegicus putative C3orf6 protein homolog (human) (C3orf6h)_mRNA [NM_182736]                                                                                                  | 0.36 | 0.00205 |
| A_44_P736196  | BI292036      | BI292036 UI-R-DN0-ciu-e-22-0-UI.s1 UI-R-DN0 Rattus norvegicus cDNA clone UI-R-DN0-ciu-e-22-0-UI 3'_mRNA sequence [BI292036]                                                           | 0.36 | 0.00151 |
| A_44_P1055903 | RGD1563278    | PREDICTED: Rattus norvegicus similar to Ubiquitin ligase protein DZIP3 (DAZ-interacting protein 3 homolog) (LOC303963)_mRNA [XM_221487]                                               | 0.36 | 0.00101 |
| A_44_P138098  | RGD1564981    | PREDICTED: Rattus norvegicus similar to Nonspecific lipid-transfer protein_mitochondrial precursor (NSL-TP) (Sterol carrier protein 2) (SCP-2) (Sterol carrier protein X) (SCP-X) (LO | 0.36 | 0.00084 |
| A_43_P15918   | RIMBP2        | PREDICTED: Rattus norvegicus RIM binding protein 2 (LOC266780)_mRNA [XM_341071]                                                                                                       | 0.36 | 0.00073 |
| A_44_P522524  | NR4A2         | Rattus norvegicus nuclear receptor subfamily 4_group A_member 2 (Nr4a2)_mRNA [NM_019328]                                                                                              | 0.36 | 0.00056 |
| A_44_P121446  | MGC95001      | Rattus norvegicus similar to CGI-100-like protein (MGC95001)_mRNA [NM_001007619]                                                                                                      | 0.36 | 0.00038 |
| A_44_P163957  | LOC363343     | Rattus norvegicus LOC363343 (LOC363343)_mRNA [XM_343681]                                                                                                                              | 0.36 | 0.00030 |
| A_44_P944757  | HNRPA1        | Rattus norvegicus heterogeneous nuclear ribonucleoprotein A1 (Hnrpa1)_mRNA [NM_017248]                                                                                                | 0.36 | 0.00029 |
| A_44_P296230  | AI175989      | AI175989 EST219565 Normalized rat ovary_Bento Soares Rattus sp. cDNA clone ROVBJ10 3' end_mRNA sequence [AI175989]                                                                    | 0.36 | 0.00026 |
| A_44_P100197  | MGC72997      | Rattus norvegicus similar to 6030490101Rik (MGC72997)_mRNA [NM_001009537]                                                                                                             | 0.36 | 0.00023 |
| A_44_P624643  | TC547485      | Q618F0 (Q618F0) Gag polyprotein_partial (7%) [TC547485]                                                                                                                               | 0.36 | 0.00022 |
| A_44_P452978  | BE110169      | BE110169 UI-R-BJ1-avf-h-05-0-UI.s1 UI-R-BJ1 Rattus norvegicus cDNA clone UI-R-BJ1-avf-h-05-0-UI 3'_mRNA sequence [BE110169]                                                           | 0.36 | 0.00016 |
| A_44_P516958  | RGD1562407    | PREDICTED: Rattus norvegicus similar to WAC (LOC307029)_mRNA [XM_225472]                                                                                                              | 0.36 | 0.00007 |
| A_44_P362823  | AW140970      | AW140970 EST290982 Normalized rat embryo_Bento Soares Rattus sp. cDNA clone RGIAW77 5' end similar to c-Ki-ras_mRNA sequence [AW140970]                                               | 0.36 | 0.00005 |
| A_44_P147600  | NPAT          | PREDICTED: Rattus norvegicus nuclear protein in the AT region (predicted) (Npat_predicted)_mRNA [XM_236292]                                                                           | 0.36 | 0.00004 |
| A_44_P518160  | RGD1306255    | PREDICTED: Rattus norvegicus similar to 2810453L12Rik protein (predicted) (LOC310807)_mRNA [XM_227619]                                                                                | 0.36 | 0.00001 |
| A_44_P769703  | NREP          | Rattus norvegicus neuronal regeneration related protein (Nrep)_mRNA [NM_178096]                                                                                                       | 0.36 | 0.00000 |
| A_44_P243881  | ENSRNOT000000 | Unknown                                                                                                                                                                               | 0.36 | 0.00000 |
| A_44_P545314  | VPS4A         | Rattus norvegicus vacuolar protein sorting 4a (yeast) (Vps4a)_mRNA [NM_145678]                                                                                                        | 0.36 | 0.00000 |
| A_43_P20765   | M16829        | RATPKCBI Rat protein kinase C (PKC) type beta-I gene_exon X [M16829]                                                                                                                  | 0.35 | 0.00496 |
| A_44_P349475  | CDH2          | Rattus norvegicus cadherin 2 (Cdh2)_mRNA [NM_031333]                                                                                                                                  | 0.35 | 0.00492 |
| A_44_P838725  | TC524202      | Unknown                                                                                                                                                                               | 0.35 | 0.00475 |
| A_43_P11955   | SYN2          | Rattus norvegicus synapsin II (Syn2)_transcript variant 2_mRNA [NM_019159]                                                                                                            | 0.35 | 0.00448 |
| A_44_P349475  | CDH2          | Rattus norvegicus cadherin 2 (Cdh2)_mRNA [NM_031333]                                                                                                                                  | 0.35 | 0.00288 |
| A_44_P823063  | TC557437      | Unknown                                                                                                                                                                               | 0.35 | 0.00271 |
| A_44_P349475  | CDH2          | Rattus norvegicus cadherin 2 (Cdh2)_mRNA [NM_031333]                                                                                                                                  | 0.35 | 0.00238 |

|              |                |                                                                                                                                                                                                  |      |         |
|--------------|----------------|--------------------------------------------------------------------------------------------------------------------------------------------------------------------------------------------------|------|---------|
| A_44_P530356 | AI502122       | AI502122 UI-R-C2p-rx-d-04-0-UI.s2 UI-R-C2p Rattus norvegicus cDNA clone UI-R-C2p-rx-d-04-0-UI 3' mRNA sequence [AI502122]                                                                        | 0.35 | 0.00147 |
| A_44_P511228 | XM_232629      | Rattus norvegicus similar to Heterogeneous nuclear ribonucleoprotein A1 (Helix-destabilizing protein) (Single-strand binding protein) (hnRNP core protein A1) (HDP) (LOC312921)_mRNA [XM_232629] | 0.35 | 0.00130 |
| A_44_P311945 | RGD1310351     | PREDICTED: Rattus norvegicus similar to RIKEN cDNA 4732418C07 (predicted) (LOC298425)_mRNA [XM_216499]                                                                                           | 0.35 | 0.00025 |
| A_44_P351963 | RGD1564739     | PREDICTED: Rattus norvegicus similar to spermatogenesis associated glutamate (E)-rich protein 4d (LOC296782)_mRNA [XM_216075]                                                                    | 0.35 | 0.00013 |
| A_43_P17789  | RGD1306256     | PREDICTED: Rattus norvegicus similar to hypothetical protein FLJ30373 (predicted) (LOC361528)_mRNA [XM_341812]                                                                                   | 0.35 | 0.00013 |
| A_42_P650571 | ENSRNOT0000004 | Q6RY99 (Q6RY99) Gamma-hydroxybutyrate receptor_partial (4%) [TC521986]                                                                                                                           | 0.35 | 0.00011 |
| A_44_P299870 | HSPCA          | Rattus norvegicus heat shock protein 1_alpha (Hspca)_mRNA [NM_175761]                                                                                                                            | 0.35 | 0.00005 |
| A_42_P486763 | PTMA           | Rattus norvegicus prothymosin alpha (Ptma)_mRNA [NM_021740]                                                                                                                                      | 0.35 | 0.00003 |
| A_43_P18261  | MESDC2         | Rattus norvegicus mesoderm development candiate 2 (Mesdc2)_mRNA [NM_001008345]                                                                                                                   | 0.35 | 0.00002 |
| A_44_P260751 | NPTX1          | Rattus norvegicus neuronal pentraxin 1 (Nptx1)_mRNA [NM_153735]                                                                                                                                  | 0.34 | 0.00469 |
| A_44_P746137 | XM_575744      | PREDICTED: Rattus norvegicus similar to mKIAA1321 protein (LOC500386)_mRNA [XM_575744]                                                                                                           | 0.34 | 0.00396 |
| A_44_P475084 | BQ202862       | BQ202862 UI-R-DO1-cms-k-02-0-UI.s1 UI-R-DO1 Rattus norvegicus cDNA clone UI-R-DO1-cms-k-02-0-UI 3' mRNA sequence [BQ202862]                                                                      | 0.34 | 0.00341 |
| A_44_P935726 | BG671630       | BG671630 DRNBVG04 Rat DRG Library Rattus norvegicus cDNA clone DRNBVG04 5' mRNA sequence [BG671630]                                                                                              | 0.34 | 0.00305 |
| A_44_P404836 | CP             | Rattus norvegicus ceruloplasmin (Cp)_mRNA [NM_012532]                                                                                                                                            | 0.34 | 0.00297 |
| A_44_P333146 | XM_575249      | PREDICTED: Rattus norvegicus similar to N-ethylmaleimide sensitive fusion protein attachment protein beta (LOC499903)_mRNA [XM_575249]                                                           | 0.34 | 0.00285 |
| A_44_P244535 | AA997646       | AA997646 UI-R-C0-hm-a-11-0-UI.s1 UI-R-C0 Rattus norvegicus cDNA clone UI-R-C0-hm-a-11-0-UI 3' mRNA sequence [AA997646]                                                                           | 0.34 | 0.00229 |
| A_44_P156197 | USH3A          | Rattus norvegicus Usher syndrome 3A homolog (human) (Ush3a)_mRNA [NM_153299]                                                                                                                     | 0.34 | 0.00207 |
| A_44_P855100 | BF564082       | UI-R-C4-ald-b-11-0-UI.r1 UI-R-C4 Rattus norvegicus cDNA clone UI-R-C4-ald-b-11-0-UI 5' mRNA sequence [BF564082]                                                                                  | 0.34 | 0.00181 |
| A_44_P290231 | PSAP           | Rattus norvegicus prosaposin (Psap)_mRNA [NM_013013]                                                                                                                                             | 0.34 | 0.00145 |
| A_42_P598679 | TMEM16A        | PREDICTED: Rattus norvegicus transmembrane protein 16A (predicted) (Tmem16a_predicted)_mRNA [XM_219695]                                                                                          | 0.34 | 0.00135 |
| A_43_P11210  | NM_001034150   | Rattus norvegicus signal recognition particle receptor ('docking protein') (Srpr)_mRNA [NM_001034150]                                                                                            | 0.34 | 0.00124 |
| A_44_P454719 | RGD1562952     | PREDICTED: Rattus norvegicus similar to ErbB2 interacting protein isoform 2 (LOC365661)_mRNA [XM_345147]                                                                                         | 0.34 | 0.00098 |
| A_44_P667548 | A_44_P667548   | Unknown                                                                                                                                                                                          | 0.34 | 0.00090 |
| A_42_P508722 | AA964747       | AA964747 UI-R-C0-gx-g-10-0-UI.s1 UI-R-C0 Rattus norvegicus cDNA clone UI-R-C0-gx-g-10-0-UI 3' mRNA sequence [AA964747]                                                                           | 0.34 | 0.00083 |
| A_44_P448181 | CLSTN1         | PREDICTED: Rattus norvegicus calyntenin 1 (predicted) (Clstn1_predicted)_mRNA [XM_243040]                                                                                                        | 0.34 | 0.00077 |
| A_44_P170309 | DY317431       | AGENCOURT_66813378 NIH_MGC_365 Rattus norvegicus cDNA clone IMAGE:8365309 5' mRNA sequence [DY317431]                                                                                            | 0.34 | 0.00055 |
| A_44_P823461 | TC542016       | Unknown                                                                                                                                                                                          | 0.34 | 0.00049 |
| A_44_P518311 | RBPSUH         | PREDICTED: Rattus norvegicus recombining binding protein suppressor of hairless (Drosophila) (predicted) (Rbpsuh_predicted)_mRNA [XM_232595]                                                     | 0.34 | 0.00048 |
| A_44_P375447 | XM_576713      | PREDICTED: Rattus norvegicus LOC501300 (LOC501300)_mRNA [XM_576713]                                                                                                                              | 0.34 | 0.00024 |
| A_44_P978683 | CK366797       | AGENCOURT_17149318 NIH_MGC_231 Rattus norvegicus cDNA clone IMAGE:7099610 5' mRNA sequence [CK366797]                                                                                            | 0.34 | 0.00015 |
| A_43_P21118  | DRE1           | Rattus norvegicus Dre1 protein (Dre1)_mRNA [NM_181473]                                                                                                                                           | 0.34 | 0.00012 |
| A_44_P498831 | RGD1563583     | PREDICTED: Rattus norvegicus similar to mKIAA0998 protein (LOC299208)_mRNA [XM_216751]                                                                                                           | 0.34 | 0.00011 |
| A_44_P295430 | XM_574205      | PREDICTED: Rattus norvegicus similar to spermatogenesis associated glutamate (E)-rich protein 4d (LOC498915)_mRNA [XM_574205]                                                                    | 0.34 | 0.00011 |
| A_44_P484199 | AI007835       | AI007835 EST202286 Normalized rat brain_Bento Soares Rattus sp. cDNA clone RBRAV51 3' end mRNA sequence [AI007835]                                                                               | 0.34 | 0.00007 |
| A_44_P302476 | XM_343707      | Rattus norvegicus similar to RIKEN cDNA 4933431D05 (LOC363372)_mRNA [XM_343707]                                                                                                                  | 0.34 | 0.00005 |
| A_43_P12611  | PTEN           | Rattus norvegicus phosphatase and tensin homolog (Pten)_mRNA [NM_031606]                                                                                                                         | 0.34 | 0.00005 |
| A_44_P179622 | BM986233       | BM986233 EST531687 Rat gene index_normalized rat_norvegicus Rattus norvegicus cDNA clone RGIAB50 3' end similar to 57-KDa calcium-binding protein McABP_mRNA sequence [BM986233]                 | 0.34 | 0.00005 |
| A_44_P355947 | RPL3           | Rattus norvegicus ribosomal protein L3 (Rpl3)_mRNA [NM_198753]                                                                                                                                   | 0.34 | 0.00004 |
| A_44_P776350 | TC553984       | Unknown                                                                                                                                                                                          | 0.34 | 0.00002 |
| A_44_P165855 | TPT1           | Rattus norvegicus tumor protein_translationally-controlled 1 (Tpt1)_mRNA [NM_053867]                                                                                                             | 0.34 | 0.00002 |
| A_44_P487162 | XM_574503      | PREDICTED: Rattus norvegicus RAB6B_member RAS oncogene family (Rab6b)_mRNA [XM_574503]                                                                                                           | 0.34 | 0.00001 |
| A_42_P749820 | CDH13          | Rattus norvegicus cadherin 13 (Cdh13)_mRNA [NM_138889]                                                                                                                                           | 0.34 | 0.00001 |
| A_44_P365516 | TGFB14         | Rattus norvegicus (TSC-22) mRNA_complete cds. [L25785]                                                                                                                                           | 0.34 | 0.00000 |

|               |              |                                                                                                                                                                                            |      |         |
|---------------|--------------|--------------------------------------------------------------------------------------------------------------------------------------------------------------------------------------------|------|---------|
| A_44_P361830  | AI406616     | AI406616 EST234903 Normalized rat brain_Bento Soares Rattus sp. cDNA clone RBRDP41 3' end_mRNA sequence [AI406616]                                                                         | 0.34 | 0.00000 |
| A_44_P184163  | J05276       | RAT5HT1A Rat 5-hydroxytryptamine-1a receptor (5-HT-1a) gene_complete cds [J05276]                                                                                                          | 0.33 | 0.00417 |
| A_44_P551463  | CB545680     | CB545680 AMGNNUC:NRDG1-00037-D12-A nrdg1 (10855) Rattus norvegicus cDNA clone nrdg1-00037-d12 5'_mRNA sequence [CB545680]                                                                  | 0.33 | 0.00287 |
| A_44_P292665  | ST18         | Rattus norvegicus suppression of tumorigenicity 18 (St18)_mRNA [NM_153310]                                                                                                                 | 0.33 | 0.00268 |
| A_44_P407507  | KNS2         | PREDICTED: Rattus norvegicus kinesin 2 (Kns2)_mRNA [XM_343114]                                                                                                                             | 0.33 | 0.00257 |
| A_44_P312309  | EIF3S10      | PREDICTED: Rattus norvegicus eukaryotic translation initiation factor 3_subunit 10 (theta) (predicted) (Eif3s10_predicted)_mRNA [XM_238649]                                                | 0.33 | 0.00207 |
| A_44_P661776  | A_44_P661776 | Unknown                                                                                                                                                                                    | 0.33 | 0.00175 |
| A_44_P299598  | ADD2         | Rattus norvegicus similar to Beta adducin (Erythrocyte adducin beta subunit) (Adducin 63) (LOC362390)_mRNA [XM_342715]                                                                     | 0.33 | 0.00154 |
| A_44_P218229  | LOC363208    | Rattus norvegicus LOC363208 (LOC363208)_mRNA [XM_347113]                                                                                                                                   | 0.33 | 0.00131 |
| A_42_P531078  | GSTA4        | PREDICTED: Rattus norvegicus glutathione S-transferase_alpha 4 (predicted) (Gsta4_predicted)_mRNA [XM_217195]                                                                              | 0.33 | 0.00121 |
| A_44_P387188  | RBJ          | PREDICTED: Rattus norvegicus RBJ protein (Rbj)_mRNA [XM_233943]                                                                                                                            | 0.33 | 0.00100 |
| A_44_P368192  | XM_228096    | Rattus norvegicus similar to protocadherin (LOC294352)_mRNA [XM_228096]                                                                                                                    | 0.33 | 0.00096 |
| A_43_P10359   | NM_001014117 | Rattus norvegicus similar to hypothetical protein MGC10067 (RGD1310386)_mRNA [NM_001014117]                                                                                                | 0.33 | 0.00087 |
| A_43_P10856   | RGD1563950   | PREDICTED: Rattus norvegicus similar to NF-kappa-B-repressing factor (NFKB-repressing factor) (Transcription factor NRF) (LOC298316)_mRNA [XM_233308]                                      | 0.33 | 0.00080 |
| A_44_P341120  | AI103284     | AI103284 EST212573 Normalized rat embryo_Bento Soares Rattus sp. cDNA clone REMBZ67 3' end_mRNA sequence [AI103284]                                                                        | 0.33 | 0.00064 |
| A_44_P553262  | TC537534     | Q8K2C9 (Q8K2C9) Butyrate-induced transcript 1_complete [TC537534]                                                                                                                          | 0.33 | 0.00049 |
| A_44_P791184  | XM_576381    | PREDICTED: Rattus norvegicus similar to Heterogeneous nuclear ribonucleoprotein A1 (Helix-destabilizing protein) (Single-strand binding protein) (hnRNP core protein A1) (HDP-1) (Topoisom | 0.33 | 0.00023 |
| A_44_P106954  | ARF1         | Rattus norvegicus ADP-ribosylation factor 1 (Arf1)_mRNA [NM_022518]                                                                                                                        | 0.33 | 0.00022 |
| A_42_P595960  | PPIA         | Rattus norvegicus peptidylprolyl isomerase A (Ppia)_mRNA [NM_017101]                                                                                                                       | 0.33 | 0.00021 |
| A_44_P170120  | RGD1309754   | PREDICTED: Rattus norvegicus similar to RIKEN cDNA 2210415M20 (predicted) (LOC290851)_mRNA [XM_214382]                                                                                     | 0.33 | 0.00016 |
| A_44_P133335  | RGD1566322   | PREDICTED: Rattus norvegicus similar to Serine/threonine protein phosphatase PP1-beta catalytic subunit (PP-1B) (LOC301906)_mRNA [XM_217507]                                               | 0.33 | 0.00010 |
| A_44_P144796  | RGD1564497   | Rattus norvegicus similar to Translationally controlled tumor protein (TCTP) (p23) (21 kDa polypeptide) (p21) (Lens epithelial protein) (LOC361115)_mRNA [XM_341403]                       | 0.33 | 0.00010 |
| A_43_P21650   | RGD1306103   | PREDICTED: Rattus norvegicus similar to RIKEN cDNA 2610017G09 (predicted) (LOC315722)_mRNA [XM_236306]                                                                                     | 0.33 | 0.00005 |
| A_43_P15761   | GRIA1        | Rattus norvegicus glutamate receptor_ionotropic_AMPA1 (alpha 1) (Gria1)_mRNA [NM_031608]                                                                                                   | 0.33 | 0.00003 |
| A_44_P402956  | PRKACB       | PREDICTED: Rattus norvegicus similar to protein kinase_cAMP dependent_catalytic_beta (LOC293508)_mRNA [XM_215070]                                                                          | 0.33 | 0.00002 |
| A_44_P1059795 | EIF2S2       | Rattus norvegicus eukaryotic translation initiation factor 2_subunit 2 (beta) (Eif2s2)_mRNA [NM_199380]                                                                                    | 0.33 | 0.00000 |
| A_44_P1057955 | CD164        | Rattus norvegicus CD164 antigen (Cd164)_mRNA [NM_031812]                                                                                                                                   | 0.33 | 0.00000 |
| A_44_P524844  | NFIX         | PREDICTED: Rattus norvegicus nuclear factor I/X (Nfix)_mRNA [XM_213849]                                                                                                                    | 0.33 | 0.00000 |
| A_43_P13503   | CB547798     | CB547798 AMGNNUC:NRDG1-00058-G8-A nrdg1 (10855) Rattus norvegicus cDNA clone nrdg1-00058-g8 5'_mRNA sequence [CB547798]                                                                    | 0.32 | 0.00482 |
| A_44_P247923  | STMN4        | PREDICTED: Rattus norvegicus stathmin-like 4 (Stmn4)_mRNA [XM_341341]                                                                                                                      | 0.32 | 0.00482 |
| A_44_P292689  | SYT1         | Rattus norvegicus partial mRNA for synaptotagmin 1 (syt1 gene)_splice variant 4. [AJ617619]                                                                                                | 0.32 | 0.00404 |
| A_44_P621785  | XM_576380    | PREDICTED: Rattus norvegicus similar to Heterogeneous nuclear ribonucleoprotein A1 (Helix-destabilizing protein) (Single-strand binding protein) (hnRNP core protein A1) (HDP-1) (Topoisom | 0.32 | 0.00308 |
| A_44_P410062  | LOC290503    | Rattus norvegicus similar to Pyruvate kinase_M2 isozyme (LOC290503)_mRNA [XM_224553]                                                                                                       | 0.32 | 0.00276 |
| A_44_P205883  | RAB14        | Rattus norvegicus RAB14_member RAS oncogene family (Rab14)_mRNA [NM_053589]                                                                                                                | 0.32 | 0.00257 |
| A_44_P228351  | CD47         | Rattus norvegicus CD47 antigen (Rh-related antigen_integrin-associated signal transducer) (Cd47)_mRNA [NM_019195]                                                                          | 0.32 | 0.00236 |
| A_44_P557673  | LGI2         | PREDICTED: Rattus norvegicus leucine-rich repeat Lgi family_member 2 (predicted) (Lgi2_predicted)_mRNA [XM_223494]                                                                         | 0.32 | 0.00226 |
| A_44_P806641  | XM_576380    | PREDICTED: Rattus norvegicus similar to Heterogeneous nuclear ribonucleoprotein A1 (Helix-destabilizing protein) (Single-strand binding protein) (hnRNP core protein A1) (HDP-1) (Topoisom | 0.32 | 0.00188 |
| A_44_P732138  | TC530706     | Unknown                                                                                                                                                                                    | 0.32 | 0.00184 |
| A_44_P376505  | BC083847     | Rattus norvegicus similar to D330021B20 protein_mRNA (cDNA clone IMAGE:7121440)_partial cds. [BC083847]                                                                                    | 0.32 | 0.00184 |
| A_42_P652975  | ARHGAP9      | PREDICTED: Rattus norvegicus Rho GTPase activating protein 9 (predicted) (Arhgap9_predicted)_mRNA [XM_576241]                                                                              | 0.32 | 0.00126 |
| A_44_P771124  | BE105603     | BE105603 UI-R-BX0-ash-g-11-0-UI.s1 UI-R-BX0 Rattus norvegicus cDNA clone UI-R-BX0-ash-g-11-0-UI 3'_mRNA sequence [BE105603]                                                                | 0.32 | 0.00122 |
| A_44_P452145  | CAMK2B       | Rattus norvegicus calcium/calmodulin-dependent protein kinase II beta subunit (Camk2b)_mRNA [NM_021739]                                                                                    | 0.32 | 0.00084 |
| A_44_P801044  | NM_001025775 | Rattus norvegicus similar to hypothetical protein D330021B20 (LOC501194)_mRNA [NM_001025775]                                                                                               | 0.32 | 0.00074 |

|               |              |                                                                                                                                  |      |         |
|---------------|--------------|----------------------------------------------------------------------------------------------------------------------------------|------|---------|
| A 44_P809953  | TC531958     | Unknown                                                                                                                          | 0.32 | 0.00073 |
| A 42_P498506  | BE103448     | BE103448 UI-R-BX0-arc-b-12-0-UI.s1 UI-R-BX0 Rattus norvegicus cDNA clone UI-R-BX0-arc-b-12-0-UI 3' mRNA sequence [BE103448]      | 0.32 | 0.00059 |
| A 44_P458074  | ID3          | Rattus norvegicus inhibitor of DNA binding 3 (Id3) mRNA [NM_013058]                                                              | 0.32 | 0.00036 |
| A 44_P1034107 | NM_001013946 | Rattus norvegicus A kinase (PRKA) anchor protein 8-like (Akap8) mRNA [NM_001013946]                                              | 0.32 | 0.00030 |
| A 44_P109303  | SEC63        | PREDICTED: Rattus norvegicus SEC63-like (S. cerevisiae) (predicted) (Sec63_predicted) mRNA [XM_228305]                           | 0.32 | 0.00017 |
| A 43_P11881   | BCAT1        | Rattus norvegicus branched chain aminotransferase 1 cytosolic (Bcat1) mRNA [NM_017253]                                           | 0.32 | 0.00014 |
| A 44_P199274  | DDX3X        | PREDICTED: Rattus norvegicus DEAD (Asp-Glu-Ala-Asp) box polypeptide 3 X-linked (Ddx3x) mRNA [XM_228701]                          | 0.32 | 0.00010 |
| A 44_P429083  | ARHE         | Rattus norvegicus ras homolog gene family member E (Arhe) mRNA [NM_001007641]                                                    | 0.32 | 0.00008 |
| A 44_P485305  | LOC367390    | PREDICTED: Rattus norvegicus similar to Integrin alpha-6 precursor (VLA-6) (CD49) (LOC367390) mRNA [XM_346121]                   | 0.32 | 0.00004 |
| A 44_P411881  | XM_575696    | PREDICTED: Rattus norvegicus LOC500344 (LOC500344) mRNA [XM_575696]                                                              | 0.32 | 0.00001 |
| A 43_P12761   | ATP2B1       | Rattus norvegicus ATPase Ca++ transporting plasma membrane 1 (Atp2b1) mRNA [NM_053311]                                           | 0.31 | 0.00472 |
| A 44_P793124  | TC543860     | Q6TXI1 (Q6TXI1) LRRGT00018 partial (5%) [TC543860]                                                                               | 0.31 | 0.00322 |
| A 44_P357420  | MAMDC2       | PREDICTED: Rattus norvegicus MAM domain containing 2 (predicted) (Mamdc2_predicted) mRNA [XM_219905]                             | 0.31 | 0.00224 |
| A 44_P341093  | AI008687     | AI008687 EST203138 Normalized rat embryo_Bento Soares Rattus sp. cDNA clone REMBB65 3' end mRNA sequence [AI008687]              | 0.31 | 0.00205 |
| A 44_P428691  | ELOVL6       | Rattus norvegicus ELOVL family member 6 elongation of long chain fatty acids (yeast) (Elov6) mRNA [NM_134383]                    | 0.31 | 0.00173 |
| A 42_P765499  | RGD1560393   | PREDICTED: Rattus norvegicus similar to armadillo repeat-containing protein (LOC294948) mRNA [XM_215537]                         | 0.31 | 0.00158 |
| A 44_P636641  | AY724480     | Rattus norvegicus clone UI-R-FJ0-cpu-m-15-0-UI unknown mRNA [AY724480]                                                           | 0.31 | 0.00129 |
| A 44_P137322  | LHX9         | Rattus norvegicus LIM homeobox 9 (Lhx9) mRNA [NM_181367]                                                                         | 0.31 | 0.00121 |
| A 44_P382449  | A 44_P382449 | Unknown                                                                                                                          | 0.31 | 0.00118 |
| A 44_P464371  | RGD1305822   | PREDICTED: Rattus norvegicus similar to KIAA0877 protein (predicted) (LOC315496) mRNA [XM_235970]                                | 0.31 | 0.00103 |
| A 44_P323320  | GRM8         | R.norvegicus mRNA for metabotropic glutamate receptor subtype 8b splice insertion. [Y11153]                                      | 0.31 | 0.00097 |
| A 44_P251944  | IDI1         | Rattus norvegicus isopentenyl-diphosphate delta isomerase (Idi1) mRNA [NM_053539]                                                | 0.31 | 0.00078 |
| A 44_P363181  | CPD          | Rattus norvegicus carboxypeptidase D (Cpd) mRNA [NM_012836]                                                                      | 0.31 | 0.00069 |
| A 44_P638816  | TC524524     | AAF06086.1 partial (7%) [TC524524]                                                                                               | 0.31 | 0.00068 |
| A 44_P233742  | TSPAN5       | Rattus norvegicus tetraspanin 5 (Tspan5) mRNA [NM_001004090]                                                                     | 0.31 | 0.00068 |
| A 44_P238733  | MGC95001     | Rattus norvegicus similar to CGI-100-like protein (MGC95001) mRNA [NM_001007619]                                                 | 0.31 | 0.00062 |
| A 44_P562335  | TC543057     | Unknown                                                                                                                          | 0.31 | 0.00062 |
| A 44_P137218  | BI395685     | BI395685 EST531556 Rat gene index_normalized rat_norvegicus Rattus norvegicus cDNA clone RGICC08 5' end mRNA sequence [BI395685] | 0.31 | 0.00061 |
| A 42_P668072  | SMAD1        | Rattus norvegicus MAD homolog 1 (Drosophila) (Smad1) mRNA [NM_013130]                                                            | 0.31 | 0.00046 |
| A 44_P455011  | XM_576828    | PREDICTED: Rattus norvegicus hypothetical gene supported by BC059164 (LOC501417) mRNA [XM_576828]                                | 0.31 | 0.00038 |
| A 44_P289951  | AW914233     | AW914233 EST345550 Normalized rat brain_Bento Soares Rattus sp. cDNA clone RGIAC46 5' end mRNA sequence [AW914233]               | 0.31 | 0.00038 |
| A 44_P1032285 | NM_001024793 | Rattus norvegicus cell division cycle 27 homolog (S. cerevisiae) (Cdc27) mRNA [NM_001024793]                                     | 0.31 | 0.00037 |
| A 44_P264477  | PACSIN1      | Rattus norvegicus protein kinase C and casein kinase substrate in neurons 1 (Pacsin1) mRNA [NM_017294]                           | 0.31 | 0.00027 |
| A 44_P508906  | XM_343652    | Rattus norvegicus similar to RIKEN cDNA 4933431D05 (LOC363312) mRNA [XM_343652]                                                  | 0.31 | 0.00027 |
| A 44_P337930  | LOC287855    | PREDICTED: Rattus norvegicus hypothetical LOC287855 (LOC287855) mRNA [XM_221162]                                                 | 0.31 | 0.00027 |
| A 44_P477446  | XM_573584    | PREDICTED: Rattus norvegicus similar to signal recognition particle_72 kDa subunit (LOC498351) mRNA [XM_573584]                  | 0.31 | 0.00023 |
| A 42_P780613  | HS3ST2       | Rattus norvegicus heparan sulfate (glucosamine) 3-O-sulfotransferase 2 (Hs3st2) mRNA [NM_181370]                                 | 0.31 | 0.00015 |
| A 44_P149896  | NM_001014221 | Rattus norvegicus similar to RIKEN cDNA 1700081O22 (LOC363337) mRNA [NM_001014221]                                               | 0.31 | 0.00011 |
| A 44_P492581  | KLHDC3       | Rattus norvegicus kelch domain containing 3 (Klhdc3) mRNA [NM_001012203]                                                         | 0.31 | 0.00011 |
| A 44_P219668  | ACAT1        | Rattus norvegicus acetyl-coenzyme A acetyltransferase 1 (Acat1) mRNA [NM_017075]                                                 | 0.31 | 0.00009 |
| A 44_P349309  | GRSF1        | PREDICTED: Rattus norvegicus G-rich RNA sequence binding factor 1 (predicted) (Grsf1_predicted) mRNA [XM_223327]                 | 0.31 | 0.00008 |
| A 44_P229677  | NM_001014221 | Rattus norvegicus similar to RIKEN cDNA 1700081O22 (LOC363337) mRNA [NM_001014221]                                               | 0.31 | 0.00007 |
| A 44_P1021456 | RGD1308847   | PREDICTED: Rattus norvegicus similar to SPla/RYanodine receptor SPRY (1J970) (predicted) (LOC291860) mRNA [XM_214632]            | 0.31 | 0.00004 |

|              |              |                                                                                                                                                                                      |      |         |
|--------------|--------------|--------------------------------------------------------------------------------------------------------------------------------------------------------------------------------------|------|---------|
| A_44_P216143 | NM_001024269 | Rattus norvegicus LUC7-like (S. cerevisiae) (Luc7l)_mRNA [NM_001024269]                                                                                                              | 0.31 | 0.00003 |
| A_44_P400999 | RGD1562337   | PREDICTED: Rattus norvegicus similar to mesoderm induction early response 1 (MI-ER1) (LOC313418)_mRNA [XM_233245]                                                                    | 0.31 | 0.00003 |
| A_44_P328872 | XM_573294    | PREDICTED: Rattus norvegicus similar to hypothetical protein A (LOC498088)_mRNA [XM_573294]                                                                                          | 0.31 | 0.00002 |
| A_44_P172604 | UGCG         | Rattus norvegicus UDP-glucose ceramide glucosyltransferase (Ugcg)_mRNA [NM_031795]                                                                                                   | 0.31 | 0.00001 |
| A_44_P234460 | RGD1565338   | PREDICTED: Rattus norvegicus similar to voltage-dependent anion channel 1 (LOC299105)_mRNA [XM_216715]                                                                               | 0.31 | 0.00000 |
| A_42_P554295 | RGD1561393   | PREDICTED: Rattus norvegicus similar to CG15133-PA (LOC361932)_mRNA [XM_342232]                                                                                                      | 0.3  | 0.00482 |
| A_43_P15308  | MTAP1A       | Rattus norvegicus microtubule-associated protein 1 A (Mtap1a)_mRNA [NM_030995]                                                                                                       | 0.3  | 0.00469 |
| A_44_P469154 | AI101222     | AI101222 EST210511 Normalized rat brain_Bento Soares Rattus sp. cDNA clone RBRBK03 3' end_mRNA sequence [AI101222]                                                                   | 0.3  | 0.00452 |
| A_43_P13894  | EEA1         | PREDICTED: Rattus norvegicus early endosome antigen 1 (predicted) (Eea1_predicted)_mRNA [XM_235064]                                                                                  | 0.3  | 0.00439 |
| A_44_P262934 | NM_001013168 | Rattus norvegicus DnaJ (Hsp40) homolog_subfamily C_member 8 (Dnajc8)_mRNA [NM_001013168]                                                                                             | 0.3  | 0.00399 |
| A_44_P121187 | SCN2A1       | Rattus norvegicus partial mRNA for voltage-gated sodium channel (scn2a gene). [AJ277391]                                                                                             | 0.3  | 0.00334 |
| A_44_P898805 | A_44_P898805 | Unknown                                                                                                                                                                              | 0.3  | 0.00279 |
| A_44_P205301 | GRINL1A      | Rattus norvegicus glutamate receptor_ionotropic_N-methyl D-aspartate-like 1A (Grinl1a)_mRNA [NM_183402]                                                                              | 0.3  | 0.00264 |
| A_44_P423803 | ACTB         | Rattus norvegicus actin_beta (Actb)_mRNA [NM_031144]                                                                                                                                 | 0.3  | 0.00226 |
| A_44_P640644 | TC519882     | DDR2_MOUSE (Q62371) Discoidin domain receptor 2 precursor (Receptor protein-tyrosine kinase TKT) (Tyrosine-protein kinase TYRO 10) (Neurotrophic tyrosine kinase_receptor-related 3) | 0.3  | 0.00224 |
| A_44_P186818 | GRM8         | Rattus norvegicus glutamate receptor_metabotropic 8 (Grm8)_mRNA [NM_022202]                                                                                                          | 0.3  | 0.00132 |
| A_44_P536806 | PSMD7        | PREDICTED: Rattus norvegicus proteasome (prosome_macropain) 26S subunit_non-ATPase_7 (predicted) (Psm7_predicted)_mRNA [XM_226439]                                                   | 0.3  | 0.00131 |
| A_44_P175837 | RGD1560238   | Rattus norvegicus similar to putative ionotropic glutamate receptor GLURR-F11694B (LOC317015)_mRNA [XM_229646]                                                                       | 0.3  | 0.00108 |
| A_43_P20057  | CB545427     | CB545427 AMGNNUC:CR1-00027-F4-A Colon Rat 1 (10390) Rattus norvegicus cDNA clone cr1-00027-f4 5'_mRNA sequence [CB545427]                                                            | 0.3  | 0.00104 |
| A_44_P193966 | ACSL6        | Rattus norvegicus acyl-CoA synthetase long-chain family member 6 (Acsl6)_mRNA [NM_130739]                                                                                            | 0.3  | 0.00098 |
| A_43_P18277  | NPEPPS       | PREDICTED: Rattus norvegicus aminopeptidase puromycin sensitive (Npepps)_mRNA [XM_340889]                                                                                            | 0.3  | 0.00091 |
| A_44_P519963 | PPM1A        | Rattus norvegicus protein phosphatase 1A_magnesium dependent_alpha isoform (Ppm1a)_mRNA [NM_017038]                                                                                  | 0.3  | 0.00065 |
| A_44_P288359 | RGD1563739   | PREDICTED: Rattus norvegicus similar to tumor protein_translationally-controlled 1 (LOC289930)_mRNA [XM_223826]                                                                      | 0.3  | 0.00059 |
| A_44_P398167 | PRDX1        | Rattus norvegicus peroxiredoxin 1 (Prdx1)_mRNA [NM_057114]                                                                                                                           | 0.3  | 0.00046 |
| A_44_P378129 | ZFP451       | Rattus norvegicus similar to zinc finger protein 451; coactivator for steroid receptors (LOC316312)_mRNA [XM_237039]                                                                 | 0.3  | 0.00027 |
| A_44_P398641 | LOC301986    | PREDICTED: Rattus norvegicus similar to spermatogenesis associated glutamate (E)-rich protein 4d (LOC301986)_mRNA [XM_217515]                                                        | 0.3  | 0.00025 |
| A_44_P361327 | RGD1563249   | PREDICTED: Rattus norvegicus similar to spermatogenesis associated glutamate (E)-rich protein 4d (LOC316920)_mRNA [XM_229489]                                                        | 0.3  | 0.00017 |
| A_44_P234023 | RGD1565260   | PREDICTED: Rattus norvegicus similar to tumor protein_translationally-controlled 1 (LOC363970)_mRNA [XM_344131]                                                                      | 0.3  | 0.00017 |
| A_43_P12519  | S100A10      | Rattus norvegicus S100 calcium binding protein A10 (calpactin) (S100a10)_mRNA [NM_031114]                                                                                            | 0.3  | 0.00014 |
| A_44_P232076 | XM_576772    | PREDICTED: Rattus norvegicus similar to spermatogenesis associated glutamate (E)-rich protein 4d (LOC501359)_mRNA [XM_576772]                                                        | 0.3  | 0.00014 |
| A_44_P311917 | LOC363369    | PREDICTED: Rattus norvegicus hypothetical LOC363369 (LOC363369)_mRNA [XM_343704]                                                                                                     | 0.3  | 0.00014 |
| A_44_P171155 | NM_001014221 | Rattus norvegicus similar to RIKEN cDNA 1700081O22 (LOC363337)_mRNA [NM_001014221]                                                                                                   | 0.3  | 0.00013 |
| A_44_P255728 | NM_001014221 | Rattus norvegicus similar to RIKEN cDNA 1700081O22 (LOC363337)_mRNA [NM_001014221]                                                                                                   | 0.3  | 0.00012 |
| A_44_P264379 | PHAX         | Rattus norvegicus phosphorylated adaptor for RNA export (Phax)_mRNA [NM_173133]                                                                                                      | 0.3  | 0.00011 |
| A_44_P464295 | LOC363354    | PREDICTED: Rattus norvegicus hypothetical LOC363354 (LOC363354)_mRNA [XM_343690]                                                                                                     | 0.3  | 0.00007 |
| A_44_P191022 | PHYH         | Rattus norvegicus phytanoyl-CoA hydroxylase (Phyh)_mRNA [NM_053674]                                                                                                                  | 0.3  | 0.00006 |
| A_43_P14604  | AW143134     | AW143134 EST293430 Normalized rat brain_Bento Soares Rattus sp. cDNA clone RGIBE30 5' end_mRNA sequence [AW143134]                                                                   | 0.3  | 0.00004 |
| A_44_P554917 | RT1-CL       | Rattus norvegicus RT1 class Ib_locus Cl (RT1-CI)_mRNA [NM_206848]                                                                                                                    | 0.3  | 0.00001 |
| A_44_P487157 | RAB6A        | Rattus norvegicus GTPase Rab6 mRNA_partial cds. [AF148210]                                                                                                                           | 0.3  | 0.00000 |
| A_42_P675802 | OLFM3        | Rattus norvegicus olfactomedin 3 (Olfm3)_mRNA [NM_145777]                                                                                                                            | 0.3  | 0.00000 |
| A_43_P16715  | NM_001024903 | Rattus norvegicus SERTA domain containing 2 (Sertad2)_mRNA [NM_001024903]                                                                                                            | 0.29 | 0.00494 |
| A_44_P177381 | AI556190     | AI556190 UI-R-C2p-rd-f-06-0-UI.s1 UI-R-C2p Rattus norvegicus cDNA clone UI-R-C2p-rd-f-06-0-UI 3'_mRNA sequence [AI556190]                                                            | 0.29 | 0.00469 |
| A_44_P293948 | GHITM        | Rattus norvegicus growth hormone inducible transmembrane protein (Ghitm)_mRNA [NM_001005908]                                                                                         | 0.29 | 0.00467 |

|               |              |                                                                                                                                                                           |      |         |
|---------------|--------------|---------------------------------------------------------------------------------------------------------------------------------------------------------------------------|------|---------|
| A_44_P853254  | TC555318     | Q6KB31 (Q6KB31) 3 protein_partial (11%) [TC555318]                                                                                                                        | 0.29 | 0.00430 |
| A_44_P167259  | BC087666     | Rattus norvegicus cDNA clone IMAGE:7317367 [BC087666]                                                                                                                     | 0.29 | 0.00413 |
| A_44_P114424  | XM_574845    | PREDICTED: Rattus norvegicus similar to RGD1309360_predicted protein (LOC499521)_mRNA [XM_574845]                                                                         | 0.29 | 0.00346 |
| A_44_P529114  | AA818669     | AA818669 UI-R-A0-az-h-07-0-UI.s1 UI-R-A0 Rattus norvegicus cDNA clone UI-R-A0-az-h-07-0-UI 3' similar to emb [AA818669]                                                   | 0.29 | 0.00327 |
| A_44_P370855  | XM_217409    | PREDICTED: Rattus norvegicus bone morphogenic protein receptor_type II (serine/threonine kinase) (Bmpr2)_mRNA [XM_217409]                                                 | 0.29 | 0.00260 |
| A_44_P200292  | RGD1561724   | PREDICTED: Rattus norvegicus similar to mKIAA0716 protein (LOC366608)_mRNA [XM_345665]                                                                                    | 0.29 | 0.00257 |
| A_44_P487930  | BE112513     | BE112513 UI-R-BJ1-avi-e-12-0-UI.s1 UI-R-BJ1 Rattus norvegicus cDNA clone UI-R-BJ1-avi-e-12-0-UI 3'_mRNA sequence [BE112513]                                               | 0.29 | 0.00231 |
| A_44_P328474  | RYR2         | PREDICTED: Rattus norvegicus ryanodine receptor 2_cardiac (Ryr2)_mRNA [XM_341548]                                                                                         | 0.29 | 0.00218 |
| A_44_P550738  | NM_001014172 | Rattus norvegicus similar to RIKEN cDNA 1200013F24 (RGD1304968)_mRNA [NM_001014172]                                                                                       | 0.29 | 0.00175 |
| A_44_P509365  | AI233699     | AI233699 EST230387 Normalized rat kidney_Bento Soares Rattus sp. cDNA clone RKIDJ07 3' end_mRNA sequence [AI233699]                                                       | 0.29 | 0.00147 |
| A_42_P698874  | RGD1309059   | PREDICTED: Rattus norvegicus similar to KIAA2010 protein (predicted) (LOC314388)_mRNA [XM_234484]                                                                         | 0.29 | 0.00142 |
| A_44_P377929  | AA892994     | AA892994 EST196797 Normalized rat kidney_Bento Soares Rattus sp. cDNA clone RKIBA84 3' end_mRNA sequence [AA892994]                                                       | 0.29 | 0.00142 |
| A_42_P658815  | ATP6V1E1     | Rattus norvegicus ATPase_H+ transporting_V1 subunit E isoform 1 (Atp6v1e1)_mRNA [NM_198745]                                                                               | 0.29 | 0.00123 |
| A_44_P1038593 | ZFP312       | PREDICTED: Rattus norvegicus zinc finger protein 312 (predicted) (Zfp312_predicted)_mRNA [XM_223820]                                                                      | 0.29 | 0.00123 |
| A_43_P11527   | ADM          | Rattus norvegicus adrenomedullin (Adm)_mRNA [NM_012715]                                                                                                                   | 0.29 | 0.00119 |
| A_44_P996423  | RGD1307672   | Rattus norvegicus hypothetical LOC294390 (RGD1307672)_mRNA [NM_001008308]                                                                                                 | 0.29 | 0.00104 |
| A_42_P503281  | CLIC5        | Rattus norvegicus chloride intracellular channel 5 (Clic5)_mRNA [NM_053603]                                                                                               | 0.29 | 0.00101 |
| A_44_P446599  | AA944265     | AA944265 EST199764 Normalized rat embryo_Bento Soares Rattus sp. cDNA clone REMAE41 3' end_mRNA sequence [AA944265]                                                       | 0.29 | 0.00085 |
| A_44_P853733  | TC523243     | Unknown                                                                                                                                                                   | 0.29 | 0.00084 |
| A_44_P518233  | RGD1309979   | PREDICTED: Rattus norvegicus similar to chromosome 20 open reading frame 116 (predicted) (LOC296162)_mRNA [XM_215848]                                                     | 0.29 | 0.00080 |
| A_44_P536315  | XM_343639    | PREDICTED: Rattus norvegicus RAB12_member RAS oncogene family (Rab12)_mRNA [XM_343639]                                                                                    | 0.29 | 0.00048 |
| A_44_P1013157 | RGD1309634   | PREDICTED: Rattus norvegicus hypothetical LOC305452 (predicted) (LOC305452)_mRNA [XM_223536]                                                                              | 0.29 | 0.00048 |
| A_44_P210440  | AKAP13       | PREDICTED: Rattus norvegicus A kinase (PRKA) anchor protein 13 (Akap13)_mRNA [XM_214969]                                                                                  | 0.29 | 0.00046 |
| A_44_P208720  | XM_576797    | PREDICTED: Rattus norvegicus hypothetical gene supported by BC082068 (LOC501384)_mRNA [XM_576797]                                                                         | 0.29 | 0.00040 |
| A_44_P850336  | BG673380     | BG673380 DRNBTH09 Rat DRG Library Rattus norvegicus cDNA clone DRNBTH09 5'_mRNA sequence [BG673380]                                                                       | 0.29 | 0.00036 |
| A_44_P959647  | A_44_P959647 | Unknown                                                                                                                                                                   | 0.29 | 0.00022 |
| A_44_P173437  | XM_576693    | PREDICTED: Rattus norvegicus hypothetical gene supported by BC082068 (LOC501278)_mRNA [XM_576693]                                                                         | 0.29 | 0.00021 |
| A_42_P768978  | NRP1         | Rattus norvegicus neuropilin 1 (Nrp1)_mRNA [NM_145098]                                                                                                                    | 0.29 | 0.00016 |
| A_44_P398792  | TPT1         | Rattus norvegicus tumor protein_translationally-controlled 1 (Tpt1)_mRNA [NM_053867]                                                                                      | 0.29 | 0.00015 |
| A_44_P447781  | XM_576713    | PREDICTED: Rattus norvegicus LOC501300 (LOC501300)_mRNA [XM_576713]                                                                                                       | 0.29 | 0.00013 |
| A_44_P295414  | XM_574205    | PREDICTED: Rattus norvegicus similar to spermatogenesis associated glutamate (E)-rich protein 4d (LOC498915)_mRNA [XM_574205]                                             | 0.29 | 0.00010 |
| A_44_P520190  | SEC5L1       | Rattus norvegicus Rsec5 protein (Sec5l1)_mRNA [NM_134414]                                                                                                                 | 0.29 | 0.00009 |
| A_44_P443367  | XM_343646    | Rattus norvegicus similar to RIKEN cDNA 4933431D05 (LOC363305)_mRNA [XM_343646]                                                                                           | 0.29 | 0.00008 |
| A_44_P106351  | AW528637     | AW528637 UI-R-BO1-ajr-f-08-0-UI.s1 UI-R-BO1 Rattus norvegicus cDNA clone UI-R-BO1-ajr-f-08-0-UI 3'_mRNA sequence [AW528637]                                               | 0.29 | 0.00004 |
| A_44_P477224  | RGD1306256   | PREDICTED: Rattus norvegicus similar to hypothetical protein FLJ30373 (predicted) (LOC361528)_mRNA [XM_341812]                                                            | 0.29 | 0.00002 |
| A_44_P1035720 | KIN          | Rattus norvegicus similar to Kin protein (LOC361270)_mRNA [XM_341554]                                                                                                     | 0.29 | 0.00000 |
| A_43_P15426   | TRPC3        | Rattus norvegicus transient receptor potential cation channel_subfamily C_member 3 (Trpc3)_mRNA [NM_021771]                                                               | 0.29 | 0.00000 |
| A_44_P415400  | AA849536     | AA849536 EST192303 Normalized rat muscle_Bento Soares Rattus sp. cDNA clone R MUAG04 3' end_mRNA sequence [AA849536]                                                      | 0.28 | 0.00339 |
| A_44_P941990  | BF548061     | BF548061 UI-R-A0-bh-f-08-0-UI.r1 UI-R-A0 Rattus norvegicus cDNA clone UI-R-A0-bh-f-08-0-UI 5'_mRNA sequence [BF548061]                                                    | 0.28 | 0.00306 |
| A_44_P440923  | RPL18        | Rattus norvegicus ribosomal protein L18 (Rpl18)_mRNA [NM_031102]                                                                                                          | 0.28 | 0.00294 |
| A_44_P363410  | PPFIA1       | PREDICTED: Rattus norvegicus protein tyrosine phosphatase_receptor type_f polypeptide (PTPRF)_interacting protein_alpha 1 (predicted) (Ppfia1_predicted)_mRNA [XM_238162] | 0.28 | 0.00285 |
| A_44_P141377  | DBI          | Rattus norvegicus diazepam binding inhibitor (Dbi)_mRNA [NM_031853]                                                                                                       | 0.28 | 0.00284 |
| A_44_P385782  | AW141698     | AW141698 EST291777 Normalized rat embryo_Bento Soares Rattus sp. cDNA clone RGICD54 5' end similar to stearyl-CoA desaturase 2_mRNA sequence [AW141698]                   | 0.28 | 0.00284 |

|              |              |                                                                                                                                                                                   |      |         |
|--------------|--------------|-----------------------------------------------------------------------------------------------------------------------------------------------------------------------------------|------|---------|
| A 44_P465798 | BF397977     | BF397977 UI-R-BS2-bef-h-06-0-UI.s1 UI-R-BS2 Rattus norvegicus cDNA clone UI-R-BS2-bef-h-06-0-UI 3' mRNA sequence [BF397977]                                                       | 0.28 | 0.00264 |
| A 44_P200116 | PDE10A       | Rattus norvegicus phosphodiesterase 10A (Pde10a)_ mRNA [NM_022236]                                                                                                                | 0.28 | 0.00217 |
| A 44_P211970 | AA944455     | AA944455 EST199954 Normalized rat embryo_Bento Soares Rattus sp. cDNA clone REMAJ43 3' end_ mRNA sequence [AA944455]                                                              | 0.28 | 0.00182 |
| A 42_P606938 | RPL18        | Rattus norvegicus ribosomal protein L18 (Rpl18)_ mRNA [NM_031102]                                                                                                                 | 0.28 | 0.00174 |
| A 44_P276916 | LOC287855    | PREDICTED: Rattus norvegicus hypothetical LOC287855 (LOC287855)_ mRNA [XM_221162]                                                                                                 | 0.28 | 0.00159 |
| A 44_P897442 | NXPH1        | Rattus norvegicus neurexophilin 1 (Nxph1)_ mRNA [NM_012994]                                                                                                                       | 0.28 | 0.00154 |
| A 44_P929197 | A 44_P929197 | Unknown                                                                                                                                                                           | 0.28 | 0.00136 |
| A 42_P549321 | TC523765     | Unknown                                                                                                                                                                           | 0.28 | 0.00133 |
| A 44_P382979 | GJA5         | Rattus norvegicus gap junction membrane channel protein alpha 5 (Gja5)_ mRNA [NM_019280]                                                                                          | 0.28 | 0.00131 |
| A 44_P959251 | A 44_P959251 | Unknown                                                                                                                                                                           | 0.28 | 0.00129 |
| A 44_P274036 | NM_057202    | Rattus norvegicus kinesin family member 5B (Kif5b)_ mRNA [NM_057202]                                                                                                              | 0.28 | 0.00115 |
| A 44_P620665 | RGD1305976   | PREDICTED: Rattus norvegicus similar to RIKEN cDNA C920006C10 (predicted) (LOC362923)_ mRNA [XM_343253]                                                                           | 0.28 | 0.00108 |
| A 44_P180786 | PLEKHB2      | PREDICTED: Rattus norvegicus pleckstrin homology domain containing_ family B (evectins) member 2 (predicted) (Plekhb2_predicted)_ mRNA [XM_217372]                                | 0.28 | 0.00090 |
| A 43_P12212  | CAP1         | Rattus norvegicus CAP_ adenylate cyclase-associated protein 1 (yeast) (Cap1)_ mRNA [NM_022383]                                                                                    | 0.28 | 0.00089 |
| A 44_P621304 | A 44_P621304 | Unknown                                                                                                                                                                           | 0.28 | 0.00068 |
| A 44_P823383 | TC558225     | Unknown                                                                                                                                                                           | 0.28 | 0.00046 |
| A 44_P114352 | NM_001014221 | Rattus norvegicus similar to RIKEN cDNA 1700081O22 (LOC363337)_ mRNA [NM_001014221]                                                                                               | 0.28 | 0.00045 |
| A 44_P480234 | AF146738     | Rattus norvegicus testis specific protein (AF146738)_ mRNA [NM_138865]                                                                                                            | 0.28 | 0.00030 |
| A 44_P124121 | NM_001014221 | Rattus norvegicus similar to RIKEN cDNA 1700081O22 (LOC363337)_ mRNA [NM_001014221]                                                                                               | 0.28 | 0.00028 |
| A 44_P231792 | RGD1564936   | PREDICTED: Rattus norvegicus similar to Vacuolar ATP synthase subunit S1 precursor (V-ATPase S1 subunit) (V-ATPase S1 accessory protein) (V-ATPase Ac45 subunit) (XAP-3) (LOC3618 | 0.28 | 0.00026 |
| A 44_P755803 | AI145976     | AI145976 UI-R-BT0-qc-g-05-0-UI.s1 UI-R-BT0 Rattus norvegicus cDNA clone UI-R-BT0-qc-g-05-0-UI 3' mRNA sequence [AI145976]                                                         | 0.28 | 0.00026 |
| A 44_P328323 | RGD1564808   | PREDICTED: Rattus norvegicus similar to ubiquitin specific protease 46 (LOC289584)_ mRNA [XM_214034]                                                                              | 0.28 | 0.00021 |
| A 44_P252345 | AW919066     | AW919066 EST350370 Rat gene index_ normalized rat_ norvegicus_ Bento Soares Rattus norvegicus cDNA clone RGIFC34 5' end_ mRNA sequence [AW919066]                                 | 0.28 | 0.00019 |
| A 44_P188831 | AI1717310    | AI1717310 UI-R-Y0-aca-f-01-0-UI.s1 UI-R-Y0 Rattus norvegicus cDNA clone UI-R-Y0-aca-f-01-0-UI 3' mRNA sequence [AI1717310]                                                        | 0.28 | 0.00016 |
| A 43_P10312  | RGD1305822   | PREDICTED: Rattus norvegicus similar to KIAA0877 protein (predicted) (LOC315496)_ mRNA [XM_235970]                                                                                | 0.28 | 0.00013 |
| A 44_P790553 | A 44_P790553 | Unknown                                                                                                                                                                           | 0.28 | 0.00012 |
| A 44_P575816 | LOC363369    | PREDICTED: Rattus norvegicus hypothetical LOC363369 (LOC363369)_ mRNA [XM_343704]                                                                                                 | 0.28 | 0.00010 |
| A 44_P180294 | RGD1311309   | PREDICTED: Rattus norvegicus similar to 2510002A14Rik protein (predicted) (LOC364144)_ mRNA [XM_344235]                                                                           | 0.28 | 0.00010 |
| A 44_P128747 | XM_343745    | Rattus norvegicus similar to RIKEN cDNA 1700081O22 (LOC363422)_ mRNA [XM_343745]                                                                                                  | 0.28 | 0.00008 |
| A 44_P318435 | CCT5         | Rattus norvegicus chaperonin subunit 5 (epsilon) (Cct5)_ mRNA [NM_001004078]                                                                                                      | 0.28 | 0.00007 |
| A 44_P158316 | BF284692     | BF284692 EST449283 Rat Gene Index_ normalized rat_ Rattus norvegicus cDNA Rattus norvegicus cDNA clone RGIEV02 3' sequence_ mRNA sequence [BF284692]                              | 0.28 | 0.00002 |
| A 44_P314735 | AI137547     | AI137547 UI-R-C2p-oc-g-06-0-UI.s1 UI-R-C2p Rattus norvegicus cDNA clone UI-R-C2p-oc-g-06-0-UI 3' mRNA sequence [AI137547]                                                         | 0.28 | 0.00000 |
| A 44_P668582 | TC521397     | Unknown                                                                                                                                                                           | 0.27 | 0.00500 |
| A 43_P21364  | LOC363009    | PREDICTED: Rattus norvegicus similar to mKIAA0701 protein (LOC363009)_ mRNA [XM_343342]                                                                                           | 0.27 | 0.00478 |
| A 44_P280062 | AA925532     | AA925532 UI-R-A1-em-f-08-0-UI.s1 UI-R-A1 Rattus norvegicus cDNA clone UI-R-A1-em-f-08-0-UI 3' similar to gi [AA925532]                                                            | 0.27 | 0.00428 |
| A 43_P22936  | AKAP3        | Rattus norvegicus A-kinase anchor protein 3 (Akap3)_ mRNA [NM_001005557]                                                                                                          | 0.27 | 0.00324 |
| A 44_P507829 | AI176590     | AI176590 EST220178 Normalized rat ovary_ Bento Soares Rattus sp. cDNA clone ROVBU25 3' end_ mRNA sequence [AI176590]                                                              | 0.27 | 0.00304 |
| A 44_P944550 | A 44_P944550 | Unknown                                                                                                                                                                           | 0.27 | 0.00276 |
| A 44_P300506 | CALR         | Rattus norvegicus calreticulin (Calr)_ mRNA [NM_022399]                                                                                                                           | 0.27 | 0.00238 |
| A 44_P222845 | MYO5C        | Rattus norvegicus similar to Myosin Vc (Myosin 5C) (LOC315820)_ mRNA [XM_236411]                                                                                                  | 0.27 | 0.00222 |
| A 44_P358492 | FDF1         | Rattus norvegicus farnesyl diphosphate farnesyl transferase 1 (Fdf1)_ mRNA [NM_019238]                                                                                            | 0.27 | 0.00217 |
|              |              |                                                                                                                                                                                   |      |         |

|               |               |                                                                                                                                                         |      |         |
|---------------|---------------|---------------------------------------------------------------------------------------------------------------------------------------------------------|------|---------|
| A 44_P109957  | ENSRNOT000000 | Unknown                                                                                                                                                 | 0.27 | 0.00204 |
| A 44_P623844  | TC526485      | Q61399 (Q61399) Cyclin-dependent protein kinase_ partial (16%) [TC526485]                                                                               | 0.27 | 0.00175 |
| A 44_P239009  | XM_575487     | PREDICTED: Rattus norvegicus similar to Glycyl-tRNA synthetase (LOC500135)_ mRNA [XM_575487]                                                            | 0.27 | 0.00164 |
| A 44_P159191  | PURA          | PREDICTED: Rattus norvegicus purine rich element binding protein A (predicted) (Pura_predicted)_ mRNA [XM_226016]                                       | 0.27 | 0.00154 |
| A 44_P933782  | TC547109      | Unknown                                                                                                                                                 | 0.27 | 0.00146 |
| A 44_P338864  | NAP1L1        | Rattus norvegicus nucleosome assembly protein 1-like 1 (Nap1l1)_ mRNA [NM_053561]                                                                       | 0.27 | 0.00145 |
| A 44_P387078  | RBM28         | PREDICTED: Rattus norvegicus RNA binding motif protein 28 (predicted) (Rbm28_predicted)_ mRNA [XM_231550]                                               | 0.27 | 0.00133 |
| A 44_P1051281 | TPR           | PREDICTED: Rattus norvegicus translocated promoter region (predicted) (Tpr_predicted)_ mRNA [XM_222745]                                                 | 0.27 | 0.00128 |
| A 43_P10346   | CB547689      | CB547689 AMGNNUC:CDRG1-00019-B12-A cdrg1 (10898) Rattus norvegicus cDNA clone cdrg1-00019-b12 5'_ mRNA sequence [CB547689]                              | 0.27 | 0.00126 |
| A 44_P384628  | LOC291871     | Rattus norvegicus similar to heat shock protein 84 - mouse (LOC291871)_ mRNA [XM_226259]                                                                | 0.27 | 0.00095 |
| A 44_P422152  | LOC363395     | Rattus norvegicus similar to RIKEN cDNA 4933431D05 (LOC363395)_ mRNA [XM_343725]                                                                        | 0.27 | 0.00074 |
| A 44_P439942  | AI599392      | AI599392 EST251095 Normalized rat embryo_ Bento Soares Rattus sp. cDNA clone REMEO50 3' end_ mRNA sequence [AI599392]                                   | 0.27 | 0.00074 |
| A 44_P175349  | CRISPLD2      | Rattus norvegicus cysteine-rich secretory protein LCCL domain containing 2 (Crispld2)_ mRNA [NM_138518]                                                 | 0.27 | 0.00070 |
| A 44_P243145  | NSF           | Rattus norvegicus N-ethylmaleimide sensitive fusion protein (Nsf)_ mRNA [NM_021748]                                                                     | 0.27 | 0.00070 |
| A 42_P515028  | TC556556      | Q91ZB0 (Q91ZB0) Heart alpha-kinase (Fragment)_ partial (5%) [TC556556]                                                                                  | 0.27 | 0.00070 |
| A 44_P465684  | BE120816      | BE120816 UI-R-BS1-azs-h-03-0-UI.s1 UI-R-BS1 Rattus norvegicus cDNA clone UI-R-BS1-azs-h-03-0-UI 3'_ mRNA sequence [BE120816]                            | 0.27 | 0.00050 |
| A 44_P371050  | AA851185      | AA851185 EST193953 Normalized rat placenta_ Bento Soares Rattus sp. cDNA clone RPLAD56 3' end_ mRNA sequence [AA851185]                                 | 0.27 | 0.00040 |
| A 44_P211061  | ETV1          | PREDICTED: Rattus norvegicus ets variant gene 1 (predicted) (Etv1_predicted)_ mRNA [XM_343055]                                                          | 0.27 | 0.00038 |
| A 44_P157024  | XM_576723     | PREDICTED: Rattus norvegicus similar to spermatogenesis associated glutamate (E)-rich protein 4d (LOC501310)_ mRNA [XM_576723]                          | 0.27 | 0.00036 |
| A 44_P400884  | XM_345073     | Rattus norvegicus similar to destrin - rat (LOC365524)_ mRNA [XM_345073]                                                                                | 0.27 | 0.00030 |
| A 44_P1022237 | RAB26         | Rattus norvegicus RAB26_ member RAS oncogene family (Rab26)_ mRNA [NM_133580]                                                                           | 0.27 | 0.00027 |
| A 44_P1054506 | AI176401      | AI176401 EST219985 Normalized rat ovary_ Bento Soares Rattus sp. cDNA clone ROVBR31 3' end_ mRNA sequence [AI176401]                                    | 0.27 | 0.00024 |
| A 44_P183016  | XM_343695     | Rattus norvegicus similar to RIKEN cDNA 4933431D05 (LOC363360)_ mRNA [XM_343695]                                                                        | 0.27 | 0.00013 |
| A 43_P18329   | STIM1         | PREDICTED: Rattus norvegicus stromal interaction molecule 1 (predicted) (Stim1_predicted)_ mRNA [XM_341896]                                             | 0.27 | 0.00005 |
| A 44_P367761  | CCNG1         | Rattus norvegicus cyclin G1 (Cng1)_ mRNA [NM_012923]                                                                                                    | 0.27 | 0.00004 |
| A 44_P574057  | BF290303      | BF290303 EST454894 Rat Gene Index_ normalized rat_ Rattus norvegicus cDNA Rattus norvegicus cDNA clone RGIHU78 3' sequence_ mRNA sequence [BF290303]    | 0.27 | 0.00003 |
| A 44_P460250  | AA858928      | AA858928 UI-R-A0-bi-h-01-0-UI.s1 UI-R-A0 Rattus norvegicus cDNA clone UI-R-A0-bi-h-01-0-UI 3' similar to gb [AA858928]                                  | 0.27 | 0.00003 |
| A 44_P241230  | A 44_P241230  | Unknown                                                                                                                                                 | 0.27 | 0.00001 |
| A 44_P381881  | STAT3         | Rattus norvegicus signal transducer and activator of transcription 3 (Stat3)_ mRNA [NM_012747]                                                          | 0.27 | 0.00000 |
| A 44_P419275  | DCAMKL1       | Rattus norvegicus double cortin and calcium/calmodulin-dependent protein kinase-like 1 (Dcamkl1)_ mRNA [NM_053343]                                      | 0.27 | 0.00000 |
| A 44_P822078  | XM_576832     | PREDICTED: Rattus norvegicus similar to glutamate receptor_ ionotropic_ N-methyl D-aspartate-like 1A (LOC501422)_ mRNA [XM_576832]                      | 0.26 | 0.00484 |
| A 44_P100959  | LOC312030     | PREDICTED: Rattus norvegicus similar to mKIAA3013 protein (LOC312030)_ mRNA [XM_231361]                                                                 | 0.26 | 0.00480 |
| A 42_P620042  | GSK3B         | Rattus norvegicus glycogen synthase kinase 3 beta (Gsk3b)_ mRNA [NM_032080]                                                                             | 0.26 | 0.00461 |
| A 44_P246595  | BE116029      | BE116029 UI-R-BS1-axy-f-09-0-UI.s1 UI-R-BS1 Rattus norvegicus cDNA clone UI-R-BS1-axy-f-09-0-UI 3'_ mRNA sequence [BE116029]                            | 0.26 | 0.00360 |
| A 44_P276932  | A 44_P276932  | Unknown                                                                                                                                                 | 0.26 | 0.00331 |
| A 44_P152500  | AA956059      | AA956059 UI-R-E1-fh-a-02-0-UI.s1 UI-R-E1 Rattus norvegicus cDNA clone UI-R-E1-fh-a-02-0-UI 3'_ mRNA sequence [AA956059]                                 | 0.26 | 0.00326 |
| A 44_P590876  | XM_575596     | PREDICTED: Rattus norvegicus similar to Rho-GTPase-activating protein 25 (LOC500246)_ mRNA [XM_575596]                                                  | 0.26 | 0.00266 |
| A 44_P1029435 | RGD1308501    | PREDICTED: Rattus norvegicus similar to protein phosphatase type 1B (formerly 2C)_ Mg-dependent_ beta isoform (predicted) (LOC312381)_ mRNA [XM_231833] | 0.26 | 0.00246 |
| A 44_P208857  | MLC1          | PREDICTED: Rattus norvegicus megalencephalic leukoencephalopathy with subcortical cysts 1 (predicted) (Mlc1_predicted)_ mRNA [XM_235558]                | 0.26 | 0.00238 |
| A 44_P465554  | VDAC2         | Rattus norvegicus voltage-dependent anion channel 2 (Vdac2)_ mRNA [NM_031354]                                                                           | 0.26 | 0.00223 |
| A 44_P304825  | A 44_P304825  | Unknown                                                                                                                                                 | 0.26 | 0.00107 |
| A 44_P196401  | RT1-AW2       | Rattus norvegicus mRNA for mature MHC class Ib alpha chain. [Y13890]                                                                                    | 0.26 | 0.00106 |
| A 44_P517686  | TOMM70A       | Rattus norvegicus translocase of outer mitochondrial membrane 70 homolog A (Tomm70a)_ mRNA [NM_212519]                                                  | 0.26 | 0.00104 |



|               |              |                                                                                                                                                   |      |         |
|---------------|--------------|---------------------------------------------------------------------------------------------------------------------------------------------------|------|---------|
| A_44_P484902  | PITPN        | Rattus norvegicus phosphatidylinositol transfer protein (Pitpn)_mRNA [NM_017231]                                                                  | 0.26 | 0.00100 |
| A_44_P239985  | AF6          | Rattus norvegicus afadin (Af6)_mRNA [NM_013217]                                                                                                   | 0.26 | 0.00074 |
| A_44_P460947  | AA998677     | AA998677 UI-R-C0-ig-g-06-0-UI.s1 UI-R-C0 Rattus norvegicus cDNA clone UI-R-C0-ig-g-06-0-UI 3' mRNA sequence [AA998677]                            | 0.26 | 0.00067 |
| A_44_P185294  | LOC363336    | Rattus norvegicus similar to RIKEN cDNA 1700081O22 (LOC363336)_mRNA [XM_343674]                                                                   | 0.26 | 0.00058 |
| A_44_P1034209 | LOC305078    | PREDICTED: Rattus norvegicus laminin chain (LOC305078)_mRNA [XM_223087]                                                                           | 0.26 | 0.00037 |
| A_44_P766535  | AW917640     | AW917640 EST348944 Rat gene index_normalized rat_norvegicus_Bento Soares Rattus norvegicus cDNA clone RGIEG33 5' end_mRNA sequence [AW917640]     | 0.26 | 0.00024 |
| A_44_P516038  | RGD1359144   | Rattus norvegicus similar to chromosome 14 open reading frame 130 (RGD1359144)_mRNA [NM_001007705]                                                | 0.26 | 0.00022 |
| A_44_P324430  | MDH1         | Rattus norvegicus malate dehydrogenase 1_NAD (soluble) (Mdh1)_mRNA [NM_033235]                                                                    | 0.26 | 0.00020 |
| A_44_P440944  | XM_341649    | Rattus norvegicus similar to RIKEN cDNA 1700081O22 (LOC361372)_mRNA [XM_341649]                                                                   | 0.26 | 0.00012 |
| A_43_P19032   | CB548230     | CB548230 AMGNNUC:NRDG1-00115-F7-A nrdg1 (10855) Rattus norvegicus cDNA clone nrdg1-00115-f7 5' mRNA sequence [CB548230]                           | 0.26 | 0.00007 |
| A_44_P223041  | BQ200849     | BQ200849 UI-R-EB1-clq-k-10-0-UI.s1 UI-R-EB1 Rattus norvegicus cDNA clone UI-R-EB1-clq-k-10-0-UI 3' mRNA sequence [BQ200849]                       | 0.26 | 0.00007 |
| A_44_P579630  | TC526418     | Q8R4C9 (Q8R4C9) RNA-binding protein staufen splice form B_partial (18%) [TC526418]                                                                | 0.26 | 0.00006 |
| A_43_P11971   | CD47         | Rattus norvegicus CD47 antigen (Rh-related antigen_integrin-associated signal transducer) (Cd47)_mRNA [NM_019195]                                 | 0.26 | 0.00004 |
| A_43_P14506   | TC562927     | Unknown                                                                                                                                           | 0.26 | 0.00003 |
| A_44_P508264  | CDKN1B       | Rattus norvegicus cyclin-dependent kinase inhibitor 1B (Cdkn1b)_mRNA [NM_031762]                                                                  | 0.26 | 0.00002 |
| A_44_P173876  | PANK1        | PREDICTED: Rattus norvegicus pantothenate kinase 1 (predicted) (Pank1_predicted)_mRNA [XM_215283]                                                 | 0.26 | 0.00001 |
| A_44_P777181  | CV115445     | AGENCOURT_31523158 NIH_MGC_269 Rattus norvegicus cDNA clone IMAGE:7462409 5' mRNA sequence [CV115445]                                             | 0.26 | 0.00000 |
| A_44_P213415  | VDAC1        | Rattus norvegicus voltage-dependent anion channel 1 (Vdac1)_mRNA [NM_031353]                                                                      | 0.26 | 0.00000 |
| A_44_P903977  | TC532772     | Unknown                                                                                                                                           | 0.25 | 0.00347 |
| A_44_P243238  | GOT2         | Rattus norvegicus glutamate oxaloacetate transaminase 2 (Got2)_mRNA [NM_013177]                                                                   | 0.25 | 0.00344 |
| A_44_P100207  | CNP1         | Rattus norvegicus cyclic nucleotide phosphodiesterase 1 (Cnp1)_mRNA [NM_012809]                                                                   | 0.25 | 0.00340 |
| A_44_P156450  | PPM1B        | Rattus norvegicus protein phosphatase 1B_magnesium dependent_beta isoform (Ppm1b)_mRNA [NM_033096]                                                | 0.25 | 0.00309 |
| A_44_P399038  | BF559096     | BF559096 UI-R-C1-kv-e-03-0-UI.r1 UI-R-C1 Rattus norvegicus cDNA clone UI-R-C1-kv-e-03-0-UI 5' mRNA sequence [BF559096]                            | 0.25 | 0.00287 |
| A_44_P226231  | SLC1A2       | Rattus norvegicus glutamate transporter splice variant GLT1a mRNA_partial cds; alternatively spliced. [AY069978]                                  | 0.25 | 0.00271 |
| A_43_P10714   | RGD1559803   | PREDICTED: Rattus norvegicus similar to maestro (LOC361348)_mRNA [XM_341629]                                                                      | 0.25 | 0.00249 |
| A_44_P285161  | AI101103     | AI101103 EST210392 Normalized rat brain_Bento Soares Rattus sp. cDNA clone RBRBF53 3' end_mRNA sequence [AI101103]                                | 0.25 | 0.00236 |
| A_44_P412427  | RGD1311475   | Rattus norvegicus similar to FLJ00354 protein (LOC293698)_mRNA [XM_215206]                                                                        | 0.25 | 0.00232 |
| A_43_P16992   | AUH          | PREDICTED: Rattus norvegicus AU RNA binding protein/enoyl-coenzyme A hydratase (predicted) (Auh_predicted)_mRNA [XM_341497]                       | 0.25 | 0.00193 |
| A_44_P353212  | AI175556     | AI175556 EST219111 Normalized rat muscle_Bento Soares Rattus sp. cDNA clone RMUCO93 3' end_mRNA sequence [AI175556]                               | 0.25 | 0.00186 |
| A_44_P121796  | XM_576895    | PREDICTED: Rattus norvegicus similar to spermatogenesis associated glutamate (E)-rich protein 4d (LOC501489)_mRNA [XM_576895]                     | 0.25 | 0.00186 |
| A_43_P20205   | LDB2         | PREDICTED: Rattus norvegicus LIM domain binding 2 (predicted) (Ldb2_predicted)_mRNA [XM_214054]                                                   | 0.25 | 0.00185 |
| A_44_P321945  | NM_001013126 | Rattus norvegicus NAD(P)H:quinone oxidoreductase type 3_polypeptide A2 (Nqo3a2)_mRNA [NM_001013126]                                               | 0.25 | 0.00157 |
| A_42_P541857  | CAB39        | PREDICTED: Rattus norvegicus calcium binding protein 39 (predicted) (Cab39_predicted)_mRNA [XM_217464]                                            | 0.25 | 0.00147 |
| A_44_P596376  | TC550080     | Unknown                                                                                                                                           | 0.25 | 0.00145 |
| A_44_P274550  | UBE2D1       | PREDICTED: Rattus norvegicus ubiquitin-conjugating enzyme E2D 1_UBC4/5 homolog (yeast) (predicted) (Ube2d1_predicted)_mRNA [XM_342125]            | 0.25 | 0.00107 |
| A_44_P255305  | RGS17        | PREDICTED: Rattus norvegicus regulator of G-protein signaling 17 (predicted) (Rgs17_predicted)_mRNA [XM_217837]                                   | 0.25 | 0.00105 |
| A_43_P12983   | PIP5K2A      | Rattus norvegicus phosphatidylinositol-4-phosphate 5-kinase_type II_alpha (Pip5k2a)_mRNA [NM_053926]                                              | 0.25 | 0.00105 |
| A_44_P837006  | A_44_P837006 | Unknown                                                                                                                                           | 0.25 | 0.00088 |
| A_43_P21509   | RGD1307626   | PREDICTED: Rattus norvegicus similar to Ribonuclease III (RNase III) (p241) (predicted) (RGD1307626_predicted)_mRNA [XM_226843]                   | 0.25 | 0.00086 |
| A_44_P729134  | A_44_P729134 | Unknown                                                                                                                                           | 0.25 | 0.00083 |
| A_44_P869091  | BC099764     | Rattus norvegicus cDNA clone IMAGE:7930522 [BC099764]                                                                                             | 0.25 | 0.00083 |
| A_44_P388497  | BF283661     | BF283661 EST448252 Rat Gene Index_normalized rat_Rattus norvegicus cDNA Rattus norvegicus cDNA clone RGIEF18 3' sequence_mRNA sequence [BF283661] | 0.25 | 0.00062 |
| A_44_P807660  | TC555479     | BC016047 CLDN23 protein {Homo sapiens;}_partial (7%) [TC555479]                                                                                   | 0.25 | 0.00061 |

|               |              |                                                                                                                                                   |      |         |
|---------------|--------------|---------------------------------------------------------------------------------------------------------------------------------------------------|------|---------|
| A 44_P212695  | RGD1565183   | PREDICTED: Rattus norvegicus similar to ribosomal protein L28 (LOC293846)_ mRNA [XM_212890]                                                       | 0.25 | 0.00047 |
| A 44_P578164  | TC545684     | Unknown                                                                                                                                           | 0.25 | 0.00047 |
| A 44_P135786  | NM_001014221 | Rattus norvegicus similar to RIKEN cDNA 1700081O22 (LOC363337)_ mRNA [NM_001014221]                                                               | 0.25 | 0.00046 |
| A 44_P446409  | ATF2         | Rattus norvegicus activating transcription factor 2 (Atf2)_ mRNA [NM_031018]                                                                      | 0.25 | 0.00041 |
| A 44_P274624  | XM_346200    | Rattus norvegicus similar to RIKEN cDNA 4933431D05 (LOC367530)_ mRNA [XM_346200]                                                                  | 0.25 | 0.00025 |
| A 43_P12839   | SYBL1        | Rattus norvegicus synaptobrevin-like 1 (Sybl1)_ mRNA [NM_053531]                                                                                  | 0.25 | 0.00023 |
| A 44_P988486  | AA963194     | AA963194 UI-R-E1-gh-d-08-0-UI.s1 UI-R-E1 Rattus norvegicus cDNA clone UI-R-E1-gh-d-08-0-UI 3'_ mRNA sequence [AA963194]                           | 0.25 | 0.00021 |
| A 44_P641046  | TC562843     | Q72MK6 (Q72MK6) Sodium/hydrogen antiporter_ partial (4%) [TC562843]                                                                               | 0.25 | 0.00020 |
| A 43_P17203   | BF523141     | BF523141 UI-R-C3-sl-b-09-0-UI.r1 UI-R-C3 Rattus norvegicus cDNA clone UI-R-C3-sl-b-09-0-UI 5'_ mRNA sequence [BF523141]                           | 0.25 | 0.00015 |
| A 44_P440178  | XM_574941    | PREDICTED: Rattus norvegicus similar to RIKEN cDNA 2810489O06 (LOC499615)_ mRNA [XM_574941]                                                       | 0.25 | 0.00011 |
| A 44_P203812  | NM_001039606 | Rattus norvegicus GDP-mannose 4_6-dehydratase (Gm5)_ mRNA [NM_001039606]                                                                          | 0.25 | 0.00001 |
| A 43_P15689   | AF473850     | Rattus norvegicus vitamin A-deficient testicular protein 10-like mRNA_ partial sequence [AF473850]                                                | 0.24 | 0.00435 |
| A 42_P734868  | KCNAB3       | Rattus norvegicus potassium voltage gated channel_ shaker related subfamily_ beta member 3 (Kcnab3)_ mRNA [NM_031652]                             | 0.24 | 0.00430 |
| A 44_P960491  | UAP1         | PREDICTED: Rattus norvegicus similar to UDP-N-acetylglucosamine pyrophosphorylase 1 homolog (LOC498272)_ mRNA [XM_573497]                         | 0.24 | 0.00361 |
| A 44_P389904  | KCNQ3        | Rattus norvegicus potassium voltage-gated channel_ subfamily Q_ member 3 (Kcnq3)_ mRNA [NM_031597]                                                | 0.24 | 0.00360 |
| A 42_P684295  | SLC15A1      | Rattus norvegicus solute carrier family 15 (oligopeptide transporter)_ member 1 (Slc15a1)_ mRNA [NM_057121]                                       | 0.24 | 0.00359 |
| A 44_P884188  | TC520829     | Unknown                                                                                                                                           | 0.24 | 0.00298 |
| A 44_P296859  | AA946063     | AA946063 EST201562 Normalized rat lung_ Bento Soares Rattus sp. cDNA clone RLUBA76 3' end_ mRNA sequence [AA946063]                               | 0.24 | 0.00275 |
| A 44_P400591  | A 44_P400591 | Unknown                                                                                                                                           | 0.24 | 0.00259 |
| A 44_P421887  | RGD1564227   | PREDICTED: Rattus norvegicus similar to RIKEN cDNA 5730557B15 (LOC310200)_ mRNA [XM_226907]                                                       | 0.24 | 0.00234 |
| A 44_P545363  | FH1          | Rattus norvegicus fumarate hydratase 1 (Fh1)_ mRNA [NM_017005]                                                                                    | 0.24 | 0.00198 |
| A 44_P123994  | NM_001033666 | Rattus norvegicus destrin (Dstn)_ mRNA [NM_001033666]                                                                                             | 0.24 | 0.00163 |
| A 44_P449263  | AW915889     | AW915889 EST347193 Rat gene index_ normalized rat_ norvegicus_ Bento Soares Rattus norvegicus cDNA clone RGIDC15 5' end_ mRNA sequence [AW915889] | 0.24 | 0.00160 |
| A 44_P623516  | TC541972     | Unknown                                                                                                                                           | 0.24 | 0.00151 |
| A 44_P621328  | A 44_P621328 | Unknown                                                                                                                                           | 0.24 | 0.00141 |
| A 44_P342334  | LOC294660    | PREDICTED: Rattus norvegicus similar to peroxiredoxin 1 (LOC294660)_ mRNA [XM_212921]                                                             | 0.24 | 0.00138 |
| A 44_P487532  | RGD1563041   | PREDICTED: Rattus norvegicus similar to RIKEN cDNA 4930577M16 (LOC365924)_ mRNA [XM_345284]                                                       | 0.24 | 0.00121 |
| A 44_P302479  | LOC363424    | PREDICTED: Rattus norvegicus similar to spermatogenesis associated glutamate (E)-rich protein 4d (LOC363424)_ mRNA [XM_343747]                    | 0.24 | 0.00116 |
| A 44_P422144  | LOC296777    | PREDICTED: Rattus norvegicus similar to spermatogenesis associated glutamate (E)-rich protein 4d (LOC296777)_ mRNA [XM_216071]                    | 0.24 | 0.00115 |
| A 44_P900349  | CA511155     | UI-R-FJ0-cpv-o-10-0-UI.r1 UI-R-FJ0 Rattus norvegicus cDNA clone UI-R-FJ0-cpv-o-10-0-UI 5'_ mRNA sequence [CA511155]                               | 0.24 | 0.00114 |
| A 44_P128737  | XM_576781    | PREDICTED: Rattus norvegicus hypothetical gene supported by BC082068 (LOC501368)_ mRNA [XM_576781]                                                | 0.24 | 0.00104 |
| A 44_P305482  | PPARGC1A     | Rattus norvegicus peroxisome proliferative activated receptor_ gamma_ coactivator 1 alpha (Ppargc1a)_ mRNA [NM_031347]                            | 0.24 | 0.00102 |
| A 44_P358865  | LOC363395    | PREDICTED: Rattus norvegicus similar to SPEER 2 (LOC363395)_ mRNA [XM_343725]                                                                     | 0.24 | 0.00100 |
| A 44_P447023  | AA850922     | AA850922 EST193690 Normalized rat ovary_ Bento Soares Rattus sp. cDNA clone ROVAO46 3' end_ mRNA sequence [AA850922]                              | 0.24 | 0.00097 |
| A 44_P1044878 | AP3D         | PREDICTED: Rattus norvegicus adaptor-related protein complex 3_ delta subunit (predicted) (Ap3d_predicted)_ mRNA [XM_234908]                      | 0.24 | 0.00086 |
| A 43_P18817   | RGD1311004   | PREDICTED: Rattus norvegicus similar to NGD5 protein homolog (CGI-53) (predicted) (LOC362265)_ mRNA [XM_342571]                                   | 0.24 | 0.00084 |
| A 44_P118793  | AY325158     | Rattus norvegicus Ab1-334 mRNA_ complete cds. [AY325158]                                                                                          | 0.24 | 0.00083 |
| A 44_P309013  | MAPT         | Rattus norvegicus microtubule-associated protein tau (Mapt)_ mRNA [NM_017212]                                                                     | 0.24 | 0.00081 |
| A 44_P534585  | XM_346249    | Rattus norvegicus similar to RIKEN cDNA 4933431D05 (LOC367673)_ mRNA [XM_346249]                                                                  | 0.24 | 0.00077 |
| A 44_P821839  | A 44_P821839 | Unknown                                                                                                                                           | 0.24 | 0.00076 |
| A 44_P315647  | AI102948     | AI102948 EST212237 Normalized rat embryo_ Bento Soares Rattus sp. cDNA clone REMBV33 3' end_ mRNA sequence [AI102948]                             | 0.24 | 0.00066 |
| A 44_P135678  | RGD1305020   | PREDICTED: Rattus norvegicus similar to Hepatocellular carcinoma-associated antigen 58 homolog (predicted) (LOC311575)_ mRNA [XM_230785]          | 0.24 | 0.00047 |
| A 44_P370625  | LOC297828    | Rattus norvegicus similar to suppression of tumorigenicity 13 (colon carcinoma) Hsp70-interac (LOC297828)_ mRNA [XM_213016]                       | 0.24 | 0.00035 |

|               |                  |                                                                                                                                                             |      |         |
|---------------|------------------|-------------------------------------------------------------------------------------------------------------------------------------------------------------|------|---------|
| A 44_P459679  | A 44_P459679     | Unknown                                                                                                                                                     | 0.24 | 0.00029 |
| A 43_P10399   | KCTD9            | PREDICTED: Rattus norvegicus potassium channel tetramerisation domain containing 9 (predicted) (Kctd9_predicted)_mRNA [XM_344426]                           | 0.24 | 0.00027 |
| A 43_P13386   | PRP19            | Rattus norvegicus neuronal differentiation-related gene (Prp19)_mRNA [NM_139333]                                                                            | 0.24 | 0.00019 |
| A 44_P160876  | RAP2A            | Rattus norvegicus RAS related protein 2a? (Rap2a)_mRNA [NM_053741]                                                                                          | 0.24 | 0.00016 |
| A 44_P1026651 | ITM2B            | Rattus norvegicus integral membrane protein 2B (Itm2b)_mRNA [NM_001006963]                                                                                  | 0.24 | 0.00005 |
| A 44_P236930  | CB606450         | CB606450 AMGNNUC:TRXP1-00001-B1-A trxp1 (10556) Rattus norvegicus cDNA clone trxp1-00001-b1 5'_mRNA sequence [CB606450]                                     | 0.24 | 0.00004 |
| A 44_P548468  | NM_057202        | Rattus norvegicus kinesin family member 5B (Kif5b)_mRNA [NM_057202]                                                                                         | 0.24 | 0.00004 |
| A 44_P1017662 | ACSL1            | Rattus norvegicus acyl-CoA synthetase long-chain family member 1 (Acsl1)_mRNA [NM_012820]                                                                   | 0.24 | 0.00004 |
| A 44_P128151  | RT1-S3           | PREDICTED: Rattus norvegicus RT1 class Ib_locus S3 (RT1-S3)_mRNA [XM_215303]                                                                                | 0.24 | 0.00002 |
| A 42_P460785  | AMACR            | Rattus norvegicus alpha-methylacyl-CoA racemase (Amacr)_mRNA [NM_012816]                                                                                    | 0.24 | 0.00001 |
| A 44_P431203  | NRIP3            | PREDICTED: Rattus norvegicus nuclear receptor interacting protein 3 (predicted) (Nrip3_predicted)_mRNA [XM_341903]                                          | 0.24 | 0.00000 |
| A 44_P315161  | AI044365         | AI044365 UI-R-C0-is-f-09-0-UI.s1 UI-R-C0 Rattus norvegicus cDNA clone UI-R-C0-is-f-09-0-UI 3'_mRNA sequence [AI044365]                                      | 0.23 | 0.00485 |
| A 44_P499851  | SAFB             | Rattus norvegicus scaffold attachment factor B (Safb)_mRNA [NM_022394]                                                                                      | 0.23 | 0.00377 |
| A 44_P180080  | MAP1LC3B         | Rattus norvegicus microtubule-associated proteins 1A/1B light chain 3 (Map1lc3b)_mRNA [NM_022867]                                                           | 0.23 | 0.00349 |
| A 44_P161966  | AA900068         | AA900068 UI-R-E0-da-f-10-0-UI.s1 UI-R-E0 Rattus norvegicus cDNA clone UI-R-E0-da-f-10-0-UI 3'_mRNA sequence [AA900068]                                      | 0.23 | 0.00320 |
| A 44_P531848  | NM_001030021     | Rattus norvegicus ribosomal protein_large P2 (Rplp2)_mRNA [NM_001030021]                                                                                    | 0.23 | 0.00314 |
| A 44_P606464  | TC560183         | Q6NZX5 (Q6NZX5) FAM29A protein (Fragment)_partial (11%) [TC560183]                                                                                          | 0.23 | 0.00303 |
| A 44_P243303  | ZFP68            | Rattus norvegicus similar to KRAB-containing zinc-finger protein KRAZ2 (LOC304337)_mRNA [XM_221977]                                                         | 0.23 | 0.00272 |
| A 44_P481629  | PRKCE            | Rattus norvegicus protein kinase C_epsilon (Prkce)_mRNA [NM_017171]                                                                                         | 0.23 | 0.00255 |
| A 44_P466345  | XM_341270        | Rattus norvegicus similar to RIKEN cDNA 4933431D05 (LOC360996)_mRNA [XM_341270]                                                                             | 0.23 | 0.00242 |
| A 44_P503916  | RGD1563811       | PREDICTED: Rattus norvegicus similar to RIKEN cDNA 6030446N20 gene (LOC361292)_mRNA [XM_341577]                                                             | 0.23 | 0.00234 |
| A 44_P471141  | GALNT2           | Rattus norvegicus similar to UDP-N-acetyl-alpha-D-galactosamine:polypeptide N-acetylgalactosaminyltransferase 2; ppGalNTase-T2 (LOC292090)_mRNA [XM_238057] | 0.23 | 0.00227 |
| A 44_P258949  | PDE4B            | Rattus norvegicus phosphodiesterase 4B_cAMP specific (Pde4b)_mRNA [NM_017031]                                                                               | 0.23 | 0.00217 |
| A 44_P1014420 | RICS             | PREDICTED: Rattus norvegicus RhoGAP involved in beta-catenin-N-cadherin and NMDA receptor signaling (predicted) (Rics_predicted)_mRNA [XM_236020]           | 0.23 | 0.00217 |
| A 42_P574719  | SLC25A4          | Rattus norvegicus solute carrier family 25 (mitochondrial carrier; adenine nucleotide translocator)_member 4 (Slc25a4)_mRNA [NM_053515]                     | 0.23 | 0.00199 |
| A 44_P452282  | KCNJ3            | Rattus norvegicus potassium inwardly-rectifying channel_subfamily J_member 3 (Kcnj3)_mRNA [NM_031610]                                                       | 0.23 | 0.00197 |
| A 42_P462771  | CD9              | R.norvegicus (Sprague Dawley) CD9 mRNA for cell surface glycoprotein. [X76489]                                                                              | 0.23 | 0.00194 |
| A 44_P1024729 | BF558358         | BF558358 UI-R-E0-dm-f-02-0-UI.r1 UI-R-E0 Rattus norvegicus cDNA clone UI-R-E0-dm-f-02-0-UI 5'_mRNA sequence [BF558358]                                      | 0.23 | 0.00187 |
| A 44_P215731  | RGD1559880       | PREDICTED: Rattus norvegicus similar to casein kinase 1_gamma 3 (LOC362655)_mRNA [XM_342973]                                                                | 0.23 | 0.00175 |
| A 44_P264130  | RGD1308816       | PREDICTED: Rattus norvegicus similar to CG8009-PA (predicted) (LOC291914)_mRNA [XM_214651]                                                                  | 0.23 | 0.00170 |
| A 43_P11661   | RAB3A            | Rattus norvegicus RAB3A_member RAS oncogene family (Rab3a)_mRNA [NM_013018]                                                                                 | 0.23 | 0.00144 |
| A 44_P328646  | XM_346182        | Rattus norvegicus similar to RIKEN cDNA 4933431D05 (LOC367511)_mRNA [XM_346182]                                                                             | 0.23 | 0.00140 |
| A 44_P180866  | AA955942         | AA955942 UI-R-E1-ff-b-03-0-UI.s1 UI-R-E1 Rattus norvegicus cDNA clone UI-R-E1-ff-b-03-0-UI 3' similar to gi [AA955942]                                      | 0.23 | 0.00118 |
| A 43_P21226   | USP8             | PREDICTED: Rattus norvegicus ubiquitin specific protease 8 (predicted) (Usp8_predicted)_mRNA [XM_215821]                                                    | 0.23 | 0.00104 |
| A 44_P617630  | AW914552         | AW914552 EST345856 Normalized rat brain_Bento Soares Rattus sp. cDNA clone RGI AH95 5' end_mRNA sequence [AW914552]                                         | 0.23 | 0.00103 |
| A 44_P344703  | XM_574955        | PREDICTED: Rattus norvegicus similar to FLJ16641 protein (LOC499631)_mRNA [XM_574955]                                                                       | 0.23 | 0.00069 |
| A 44_P257863  | ENSRNOT000000003 | Unknown                                                                                                                                                     | 0.23 | 0.00065 |
| A 44_P684899  | TC558523         | Unknown                                                                                                                                                     | 0.23 | 0.00064 |
| A 44_P897247  | RAB11A           | Rattus norvegicus RAB11a_member RAS oncogene family (Rab11a)_mRNA [NM_031152]                                                                               | 0.23 | 0.00061 |
| A 44_P553665  | RPS9             | Rattus norvegicus ribosomal protein S9 (Rps9)_mRNA [NM_031108]                                                                                              | 0.23 | 0.00057 |
| A 44_P269752  | A 44_P269752     | Unknown                                                                                                                                                     | 0.23 | 0.00054 |
| A 44_P884109  | TRIM2            | Rattus norvegicus clone UI-R-FJ0-cpz-g-01-0-UI unknown mRNA. [AY724524]                                                                                     | 0.23 | 0.00044 |
| A 44_P118137  | NM_001033066     | Rattus norvegicus DDHD domain containing 1 (Ddhd1)_mRNA [NM_001033066]                                                                                      | 0.23 | 0.00040 |

|               |               |                                                                                                                                                                          |      |         |
|---------------|---------------|--------------------------------------------------------------------------------------------------------------------------------------------------------------------------|------|---------|
| A 44 P505932  | CTTN          | Rattus norvegicus cortactin isoform B (Ctn)_ mRNA [NM_021868]                                                                                                            | 0.23 | 0.00039 |
| A 44 P523244  | RGD1305976    | PREDICTED: Rattus norvegicus similar to RIKEN cDNA C920006C10 (predicted) (LOC362923)_ mRNA [XM_343253]                                                                  | 0.23 | 0.00033 |
| A 44 P382255  | RGD1561985    | PREDICTED: Rattus norvegicus similar to dystrobrevin alpha isoform 1 (LOC307548)_ mRNA [XM_226109]                                                                       | 0.23 | 0.00031 |
| A 44 P384304  | A 44 P384304  | Unknown                                                                                                                                                                  | 0.23 | 0.00026 |
| A 43 P23197   | MGC95208      | Rattus norvegicus similar to 4930453N24Rik protein (MGC95208)_ mRNA [NM_001005552]                                                                                       | 0.23 | 0.00026 |
| A 44 P172489  | ACSL1         | Rattus norvegicus acyl-CoA synthetase long-chain family member 1 (Acs1)_ mRNA [NM_012820]                                                                                | 0.23 | 0.00023 |
| A 44 P400195  | ATP5C1        | Rattus norvegicus ATP synthase_H+ transporting_ mitochondrial F1 complex_ gamma polypeptide 1 (Atp5c1)_ mRNA [NM_053825]                                                 | 0.23 | 0.00023 |
| A 44 P221077  | NM_001017479  | Rattus norvegicus similar to RIKEN cDNA 1810057C19 (MGC108778)_ mRNA [NM_001017479]                                                                                      | 0.23 | 0.00019 |
| A 44 P536932  | UQCRH         | Rattus norvegicus ubiquinol-cytochrome c reductase hinge protein (Uqcrh)_ mRNA [NM_001009480]                                                                            | 0.23 | 0.00015 |
| A 43 P13040   | RHOA          | Rattus norvegicus ras homolog gene family_ member A (Rhoa)_ mRNA [NM_057132]                                                                                             | 0.23 | 0.00009 |
| A 44 P466796  | LOC367171     | Rattus norvegicus similar to microtubule-associated protein 4 (LOC367171)_ mRNA [XM_345984]                                                                              | 0.23 | 0.00005 |
| A 44 P1023977 | SH3KBP1       | Rattus norvegicus SH3-domain kinase binding protein 1 (Sh3kbp1)_ mRNA [NM_053360]                                                                                        | 0.23 | 0.00004 |
| A 42 P582378  | SC65          | Rattus norvegicus synaptonemal complex protein SC65 (Sc65)_ mRNA [NM_021581]                                                                                             | 0.23 | 0.00003 |
| A 44 P1020467 | RGD1309385    | PREDICTED: Rattus norvegicus similar to RIKEN cDNA E030034P13 (predicted) (LOC360488)_ mRNA [XM_340760]                                                                  | 0.23 | 0.00003 |
| A 44 P311642  | SUPT16H       | PREDICTED: Rattus norvegicus suppressor of Ty 16 homolog (S. cerevisiae) (predicted) (Supt16h_predicted)_ mRNA [XM_223981]                                               | 0.23 | 0.00002 |
| A 44 P194894  | NM_001013079  | Rattus norvegicus oxysterol binding protein-like 2 (Osbp12)_ mRNA [NM_001013079]                                                                                         | 0.23 | 0.00002 |
| A 44 P322910  | PDGFA         | Rattus norvegicus platelet derived growth factor_ alpha (Pdgfa)_ mRNA [NM_012801]                                                                                        | 0.23 | 0.00001 |
| A 44 P480533  | A 44 P480533  | Unknown                                                                                                                                                                  | 0.22 | 0.00475 |
| A 44 P525431  | ASPH          | PREDICTED: Rattus norvegicus aspartate-beta-hydroxylase (predicted) (Asph_predicted)_ mRNA [XM_232675]                                                                   | 0.22 | 0.00457 |
| A 44 P386099  | AI175475      | AI175475 EST219025 Normalized rat muscle_Bento Soares Rattus sp. cDNA clone RMUCN91 3' end_ mRNA sequence [AI175475]                                                     | 0.22 | 0.00448 |
| A 44 P138231  | LOC315661     | Rattus norvegicus similar to Elongation factor 1-alpha 1 (EF-1-alpha-1) (Elongation factor 1 A-1) (eEF1A-1) (Elongation factor Tu) (EF-Tu) (LOC315661)_ mRNA [XM_236238] | 0.22 | 0.00428 |
| A 44 P247667  | UBE2G1        | Rattus norvegicus ubiquitin-conjugating enzyme E2G 1 (UBC7 homolog_ C. elegans) (Ube2g1)_ mRNA [NM_022690]                                                               | 0.22 | 0.00399 |
| A 44 P260433  | RGD1306101    | PREDICTED: Rattus norvegicus similar to 4933407C03Rik protein (predicted) (LOC292051)_ mRNA [XM_214698]                                                                  | 0.22 | 0.00383 |
| A 44 P116449  | RALA          | Rattus norvegicus v-ral simian leukemia viral oncogene homolog A (ras related) (Rala)_ mRNA [NM_031093]                                                                  | 0.22 | 0.00375 |
| A 44 P520441  | PCDH9         | PREDICTED: Rattus norvegicus protocadherin 9 (predicted) (Pcdh9_predicted)_ mRNA [XM_224429]                                                                             | 0.22 | 0.00354 |
| A 44 P807565  | TC556734      | Q96285 (Q96285) Receptor-like kinase LECRK1 (Serine/threonine-specific kinase lecRK1_ lectin receptor-like) _ partial (4%) [TC556734]                                    | 0.22 | 0.00345 |
| A 44 P790861  | A 44 P790861  | Unknown                                                                                                                                                                  | 0.22 | 0.00306 |
| A 44 P339741  | NM_001025270  | Rattus norvegicus melanocortin 3 receptor (Mc3r)_ mRNA [NM_001025270]                                                                                                    | 0.22 | 0.00301 |
| A 43 P17974   | COG4          | PREDICTED: Rattus norvegicus component of oligomeric golgi complex 4 (predicted) (Cog4_predicted)_ mRNA [XM_341688]                                                      | 0.22 | 0.00295 |
| A 44 P212922  | RGD1565029    | PREDICTED: Rattus norvegicus similar to 4632409L22Rik protein (LOC308361)_ mRNA [XM_218291]                                                                              | 0.22 | 0.00268 |
| A 43 P19140   | CB548253      | CB548253 AMGNNUC:NRHT1-00001-D7-A SD rat hypothalamus (10460) Rattus norvegicus cDNA clone nrht1-00001-d7 5'_ mRNA sequence [CB548253]                                   | 0.22 | 0.00266 |
| A 44 P866312  | BG665051      | DRABXF10 Rat DRG Library Rattus norvegicus cDNA clone DRABXF10 5'_ mRNA sequence [BG665051]                                                                              | 0.22 | 0.00266 |
| A 43 P11911   | RAB3IP        | Rattus norvegicus RAB3A interacting protein (Rab3ip)_ mRNA [NM_017313]                                                                                                   | 0.22 | 0.00264 |
| A 44 P255965  | A 44 P255965  | Unknown                                                                                                                                                                  | 0.22 | 0.00258 |
| A 44 P338703  | AW918458      | AW918458 EST349762 Rat gene index_ normalized rat_ norvegicus_ Bento Soares Rattus norvegicus cDNA clone RGIES56 5' end_ mRNA sequence [AW918458]                        | 0.22 | 0.00236 |
| A 44 P461331  | SLC25A16      | PREDICTED: Rattus norvegicus solute carrier family 25 (mitochondrial carrier_ Graves disease autoantigen)_ member 16 (predicted) (Slc25a16_predicted)_ mRNA [XM_342129]  | 0.22 | 0.00221 |
| A 42 P518818  | DBT           | PREDICTED: Rattus norvegicus dihydroipoamide branched chain transacylase E2 (Dbt)_ mRNA [XM_342328]                                                                      | 0.22 | 0.00220 |
| A 44 P101023  | RGD1564778    | PREDICTED: Rattus norvegicus similar to RIKEN cDNA 4121402D02 (LOC303514)_ mRNA [XM_239335]                                                                              | 0.22 | 0.00219 |
| A 44 P290953  | ENSRNOT000000 | Unknown                                                                                                                                                                  | 0.22 | 0.00219 |
| A 44 P492843  | VAPB          | Rattus norvegicus vesicle-associated membrane protein_ associated protein B and C (Vapb)_ mRNA [NM_021847]                                                               | 0.22 | 0.00209 |
| A 44 P407736  | RGD1304890    | Rattus norvegicus similar to RIKEN cDNA 1810045K17 (LOC365797)_ mRNA [XM_345211]                                                                                         | 0.22 | 0.00204 |
| A 44 P362992  | TCF12         | Rattus norvegicus transcription factor 12 (Tcf12)_ mRNA [NM_013176]                                                                                                      | 0.22 | 0.00201 |
| A 44 P463980  | RGD1565332    | PREDICTED: Rattus norvegicus similar to interferon induced transmembrane protein 3 (LOC289685)_ mRNA [XM_223483]                                                         | 0.22 | 0.00198 |

|               |                              |                                                                                                                                                   |      |         |
|---------------|------------------------------|---------------------------------------------------------------------------------------------------------------------------------------------------|------|---------|
| A_44_P200647  | <a href="#">XM_573903</a>    | PREDICTED: Rattus norvegicus high mobility group box 2 (Hmgb2)_ mRNA [XM_573903]                                                                  | 0.22 | 0.00184 |
| A_44_P108982  | <a href="#">SUCLA2</a>       | PREDICTED: Rattus norvegicus succinate-Coenzyme A ligase_ ADP-forming_ beta subunit (predicted) (Sucla2_predicted)_ mRNA [XM_341354]              | 0.22 | 0.00183 |
| A_43_P18579   | <a href="#">FBXW2</a>        | PREDICTED: Rattus norvegicus F-box and WD-40 domain protein 2 (predicted) (Fbxw2_predicted)_ mRNA [XM_231162]                                     | 0.22 | 0.00178 |
| A_44_P145065  | <a href="#">XM_576828</a>    | PREDICTED: Rattus norvegicus hypothetical gene supported by BC059164 (LOC501417)_ mRNA [XM_576828]                                                | 0.22 | 0.00153 |
| A_44_P156718  | <a href="#">RGD1563608</a>   | PREDICTED: Rattus norvegicus similar to ribosomal protein L28 (LOC289830)_ mRNA [XM_214103]                                                       | 0.22 | 0.00130 |
| A_44_P276352  | <a href="#">ID3</a>          | Rattus norvegicus inhibitor of DNA binding 3 (Id3)_ mRNA [NM_013058]                                                                              | 0.22 | 0.00103 |
| A_44_P291225  | <a href="#">BQ202871</a>     | BQ202871 UI-R-DO1-cms-k-20-0-UI.s1 UI-R-DO1 Rattus norvegicus cDNA clone UI-R-DO1-cms-k-20-0-UI 3'_ mRNA sequence [BQ202871]                      | 0.22 | 0.00102 |
| A_43_P12727   | <a href="#">STAT1</a>        | Rattus norvegicus signal transducer and activator of transcription 1 (Stat1)_ transcript variant alpha_ mRNA [NM_032612]                          | 0.22 | 0.00098 |
| A_44_P511049  | <a href="#">PROSC</a>        | PREDICTED: Rattus norvegicus proline synthetase co-transcribed (predicted) (Prosc_predicted)_ mRNA [XM_224947]                                    | 0.22 | 0.00095 |
| A_44_P916648  | <a href="#">TC527874</a>     | Unknown                                                                                                                                           | 0.22 | 0.00094 |
| A_44_P333374  | <a href="#">RGD1560736</a>   | PREDICTED: Rattus norvegicus similar to solute carrier family 9 (sodium/hydrogen exchanger)_ isoform 9 (LOC363115)_ mRNA [XM_343448]              | 0.22 | 0.00082 |
| A_44_P959572  | <a href="#">EEF1G</a>        | PREDICTED: Rattus norvegicus eukaryotic translation elongation factor 1 gamma (Eef1g)_ mRNA [XM_574616]                                           | 0.22 | 0.00072 |
| A_44_P142709  | <a href="#">XM_576637</a>    | PREDICTED: Rattus norvegicus LOC501214 (LOC501214)_ mRNA [XM_576637]                                                                              | 0.22 | 0.00066 |
| A_44_P541456  | <a href="#">ARPC4</a>        | PREDICTED: Rattus norvegicus actin related protein 2/3 complex_ subunit 4 (predicted) (Arpc4_predicted)_ mRNA [XM_238365]                         | 0.22 | 0.00064 |
| A_44_P216497  | <a href="#">AW918517</a>     | AW918517 EST349821 Rat gene index_ normalized rat_ norvegicus_ Bento Soares Rattus norvegicus cDNA clone RGIEU26 5' end_ mRNA sequence [AW918517] | 0.22 | 0.00057 |
| A_43_P11707   | <a href="#">VAMP1</a>        | Rattus norvegicus vesicle-associated membrane protein 1 (Vamp1)_ mRNA [NM_013090]                                                                 | 0.22 | 0.00051 |
| A_44_P745994  | <a href="#">TC539069</a>     | Q617T7 (Q617T7) NADH dehydrogenase subunit 6_ partial (9%) [TC539069]                                                                             | 0.22 | 0.00046 |
| A_44_P480222  | <a href="#">MAPK9</a>        | Rattus norvegicus mitogen-activated protein kinase 9 (Mapk9)_ mRNA [NM_017322]                                                                    | 0.22 | 0.00045 |
| A_44_P996393  | <a href="#">MGAT2</a>        | Rattus norvegicus Alpha-1_6-mannosyl-glycoprotein 2-beta-N-acetylglucosaminyltransferase (Mgat2)_ mRNA [NM_053604]                                | 0.22 | 0.00035 |
| A_44_P121215  | <a href="#">DNM1L</a>        | Rattus norvegicus dynamin-like protein DLP1 isoform DLP1-37 mRNA_ complete cds. [AF132727]                                                        | 0.22 | 0.00032 |
| A_42_P666951  | <a href="#">NM_134360</a>    | Rattus norvegicus tumor necrosis factor receptor superfamily_ member 5 (Tnfrsf5)_ mRNA [NM_134360]                                                | 0.22 | 0.00032 |
| A_44_P197086  | <a href="#">NM_001025284</a> | Rattus norvegicus similar to hypothetical protein FLJ14494 (RGD1311268)_ mRNA [NM_001025284]                                                      | 0.22 | 0.00024 |
| A_44_P994906  | <a href="#">RGD1561761</a>   | PREDICTED: Rattus norvegicus similar to TIGIRR-1 (LOC300913)_ mRNA [XM_236512]                                                                    | 0.22 | 0.00016 |
| A_44_P428036  | <a href="#">AI044887</a>     | AI044887 UI-R-C1-kk-a-01-0-UI.s1 UI-R-C1 Rattus norvegicus cDNA clone UI-R-C1-kk-a-01-0-UI 3'_ mRNA sequence [AI044887]                           | 0.22 | 0.00016 |
| A_44_P641532  | <a href="#">TC563752</a>     | Unknown                                                                                                                                           | 0.22 | 0.00016 |
| A_43_P15415   | <a href="#">P34</a>          | Rattus norvegicus p34 protein (P34)_ mRNA [NM_134398]                                                                                             | 0.22 | 0.00009 |
| A_42_P750340  | <a href="#">RGD1563319</a>   | PREDICTED: Rattus norvegicus similar to RIKEN cDNA 6330512M04 gene (LOC293632)_ mRNA [XM_215129]                                                  | 0.22 | 0.00009 |
| A_44_P515461  | <a href="#">BPNT1</a>        | Rattus norvegicus bisphosphate 3'-nucleotidase 1 (Bpnt1)_ mRNA [NM_171990]                                                                        | 0.22 | 0.00006 |
| A_44_P254973  | <a href="#">MDS024</a>       | Rattus norvegicus putative RNA methylase MDS024 (Mds024)_ mRNA [NM_198051]                                                                        | 0.22 | 0.00006 |
| A_44_P440517  | <a href="#">RT1-CE4</a>      | Rattus norvegicus RT1 class I_ CE4 (RT1-CE4)_ mRNA [NM_001008842]                                                                                 | 0.22 | 0.00006 |
| A_43_P17678   | <a href="#">SBDS</a>         | Rattus norvegicus Shwachman-Bodian-Diamond syndrome (Sbds)_ mRNA [NM_001008289]                                                                   | 0.22 | 0.00004 |
| A_44_P166278  | <a href="#">MGC94168</a>     | Rattus norvegicus similar to vacuolar protein sorting 26; vacuole protein sorting 26; H beta 58 (MGC94168)_ mRNA [NM_001007740]                   | 0.22 | 0.00002 |
| A_43_P20505   | <a href="#">BBX</a>          | PREDICTED: Rattus norvegicus bobby sox homolog (Drosophila) (predicted) (Bbx_predicted)_ mRNA [XM_221497]                                         | 0.22 | 0.00002 |
| A_44_P197041  | <a href="#">NM_001035221</a> | Rattus norvegicus yippee-like 5 (Drosophila) (Ypel5)_ mRNA [NM_001035221]                                                                         | 0.22 | 0.00000 |
| A_44_P1006988 | <a href="#">ZNF318</a>       | Rattus norvegicus similar to zinc finger protein TZF-L (LOC316230)_ mRNA [XM_236929]                                                              | 0.21 | 0.00492 |
| A_44_P310386  | <a href="#">PSMD7</a>        | PREDICTED: Rattus norvegicus proteasome (prosome_ macropain) 26S subunit_ non-ATPase_ 7 (predicted) (Psmd7_predicted)_ mRNA [XM_226439]           | 0.21 | 0.00461 |
| A_44_P492635  | <a href="#">PSMD3</a>        | Rattus norvegicus proteasome (prosome_ macropain) 26S subunit_ non-ATPase_ 3 (Psmd3)_ mRNA [NM_001008281]                                         | 0.21 | 0.00392 |
| A_44_P291521  | <a href="#">BG666460</a>     | BG666460 DRA07B12 Rat DRG Library Rattus norvegicus cDNA clone DRA07B12 5'_ mRNA sequence [BG666460]                                              | 0.21 | 0.00355 |
| A_44_P182463  | <a href="#">MAP1B</a>        | PREDICTED: Rattus norvegicus microtubule-associated protein 1b (Map1b)_ mRNA [XM_215469]                                                          | 0.21 | 0.00334 |
| A_44_P397403  | <a href="#">BI275514</a>     | BI275514 UI-R-CX0-bwy-b-08-0-UI.s1 UI-R-CX0 Rattus norvegicus cDNA clone UI-R-CX0-bwy-b-08-0-UI 3'_ mRNA sequence [BI275514]                      | 0.21 | 0.00323 |
| A_44_P482281  | <a href="#">MAPK10</a>       | Rattus norvegicus mitogen activated protein kinase 10 (Mapk10)_ mRNA [NM_012806]                                                                  | 0.21 | 0.00291 |
| A_44_P147702  | <a href="#">RGD1311017</a>   | PREDICTED: Rattus norvegicus similar to multiple hat domains (predicted) (LOC360574)_ mRNA [XM_340853]                                            | 0.21 | 0.00281 |
| A_42_P536266  | <a href="#">TC520622</a>     | Unknown                                                                                                                                           | 0.21 | 0.00272 |

|              |               |                                                                                                                                                                                              |      |         |
|--------------|---------------|----------------------------------------------------------------------------------------------------------------------------------------------------------------------------------------------|------|---------|
| A 44_P256199 | CB547883      | CB547883 AMGNNUC:NRDG1-00205-A3-A nrdg1 (10855) Rattus norvegicus cDNA clone nrdg1-00205-a3 5' mRNA sequence [CB547883]                                                                      | 0.21 | 0.00250 |
| A 44_P623560 | TC540430      | Unknown                                                                                                                                                                                      | 0.21 | 0.00246 |
| A 43_P12208  | BASP1         | Rattus norvegicus brain abundant_ membrane attached signal protein 1 (Basp1)_ mRNA [NM_022300]                                                                                               | 0.21 | 0.00241 |
| A 44_P962865 | TC550274      | Q7QFB9 (Q7QFB9) AgCP13622 (Fragment)_ partial (21%) [TC550274]                                                                                                                               | 0.21 | 0.00223 |
| A 44_P116221 | CDIG2         | Rattus norvegicus cdig2 mRNA for hypothetical protein_ complete cds. [AB086193]                                                                                                              | 0.21 | 0.00214 |
| A 44_P855313 | TC563420      | Unknown                                                                                                                                                                                      | 0.21 | 0.00196 |
| A 44_P405679 | RAP1GA1       | PREDICTED: Rattus norvegicus RAP1_ GTPase activating protein 1 (predicted) (Rap1ga1_predicted)_ mRNA [XM_233609]                                                                             | 0.21 | 0.00169 |
| A 44_P477889 | NFL           | Rattus norvegicus neurofilament_ light polypeptide (Nfl)_ mRNA [NM_031783]                                                                                                                   | 0.21 | 0.00152 |
| A 44_P433542 | HNRPA3        | Rattus norvegicus heterogeneous nuclear ribonucleoprotein A3 (Hnrpa3)_ mRNA [NM_198132]                                                                                                      | 0.21 | 0.00139 |
| A 44_P962790 | TC549478      | Unknown                                                                                                                                                                                      | 0.21 | 0.00137 |
| A 44_P447701 | RGD1563969    | PREDICTED: Rattus norvegicus similar to tumor protein_ translationally-controlled 1 (LOC363865)_ mRNA [XM_344072]                                                                            | 0.21 | 0.00135 |
| A 44_P667876 | ENSRNOT000000 | Unknown                                                                                                                                                                                      | 0.21 | 0.00133 |
| A 44_P449373 | AW524106      | AW524106 UI-R-BO0-ahr-e-12-0-UI.s1 UI-R-BO0 Rattus norvegicus cDNA clone UI-R-BO0-ahr-e-12-0-UI 3' mRNA sequence [AW524106]                                                                  | 0.21 | 0.00124 |
| A 44_P116300 | PPARGC1B      | Rattus norvegicus peroxisome proliferative activated receptor_ gamma_ coactivator 1 beta (Ppargc1b)_ mRNA [NM_176075]                                                                        | 0.21 | 0.00117 |
| A 44_P287194 | HSPCB         | Rattus norvegicus heat shock 90kDa protein 1_ beta (Hspcb)_ mRNA [NM_001004082]                                                                                                              | 0.21 | 0.00112 |
| A 44_P128386 | RGD1307507    | PREDICTED: Rattus norvegicus similar to CG14182-PA (predicted) (LOC361639)_ mRNA [XM_341918]                                                                                                 | 0.21 | 0.00112 |
| A 44_P414066 | LDHB          | Rattus norvegicus lactate dehydrogenase B (Ldhb)_ mRNA [NM_012595]                                                                                                                           | 0.21 | 0.00110 |
| A 44_P249784 | AA944160      | AA944160 EST199659 Normalized rat embryo_ Bento Soares Rattus sp. cDNA clone REMAD10 3' end_ mRNA sequence [AA944160]                                                                        | 0.21 | 0.00103 |
| A 44_P302310 | DSG1C         | PREDICTED: Rattus norvegicus desmoglein 1 gamma (predicted) (Dsg1c_predicted)_ mRNA [XM_214616]                                                                                              | 0.21 | 0.00098 |
| A 44_P253122 | RGD1306717    | Rattus norvegicus similar to hypothetical protein MGC25461 (LOC311257)_ mRNA [XM_230334]                                                                                                     | 0.21 | 0.00098 |
| A 44_P311028 | BQ194449      | BQ194449 UI-R-CN1-cma-h-16-0-UI.s1 UI-R-CN1 Rattus norvegicus cDNA clone UI-R-CN1-cma-h-16-0-UI 3' mRNA sequence [BQ194449]                                                                  | 0.21 | 0.00086 |
| A 44_P264381 | TDRD7         | Rattus norvegicus tudor domain containing 7 (Tdrd7)_ mRNA [NM_138871]                                                                                                                        | 0.21 | 0.00084 |
| A 44_P199038 | NM_001013992  | Rattus norvegicus similar to hypothetical protein FLJ22419 (LOC305691)_ mRNA [NM_001013992]                                                                                                  | 0.21 | 0.00075 |
| A 44_P459492 | NM_001037358  | Rattus norvegicus LIM domain only 2 (Lmo2)_ mRNA [NM_001037358]                                                                                                                              | 0.21 | 0.00043 |
| A 44_P501724 | XM_576721     | PREDICTED: Rattus norvegicus hypothetical gene supported by BC059164 (LOC501308)_ mRNA [XM_576721]                                                                                           | 0.21 | 0.00040 |
| A 44_P764671 | TC561998      | Unknown                                                                                                                                                                                      | 0.21 | 0.00027 |
| A 44_P409654 | AMACR         | Rattus norvegicus alpha-methylacyl-CoA racemase (Amacr)_ mRNA [NM_012816]                                                                                                                    | 0.21 | 0.00020 |
| A 44_P288826 | RGD1308134    | PREDICTED: Rattus norvegicus similar to RIKEN cDNA 1110020A23 (predicted) (LOC287452)_ mRNA [XM_213357]                                                                                      | 0.21 | 0.00020 |
| A 44_P469394 | AMPH1         | Rattus norvegicus amphiphysin 1 (Amph1)_ mRNA [NM_022217]                                                                                                                                    | 0.21 | 0.00020 |
| A 44_P255985 | RGD1310128    | PREDICTED: Rattus norvegicus similar to DNA segment_ Chr 13_ Wayne State University 50_ expressed (predicted) (LOC290939)_ mRNA [XM_214417]                                                  | 0.21 | 0.00019 |
| A 44_P210686 | TC517135      | Q8C5Q5 (Q8C5Q5) Mus musculus adult male thymus cDNA_ RIKEN full-length enriched library_ clone:5830447N23 product:chaperonin subunit 7 (eta)_ full insert sequence_ partial (31%) [TC517135] | 0.21 | 0.00018 |
| A 44_P515410 | NFIX          | PREDICTED: Rattus norvegicus nuclear factor I/X (Nfix)_ mRNA [XM_213849]                                                                                                                     | 0.21 | 0.00017 |
| A 43_P11359  | AW921109      | AW921109 EST352413 Rat gene index_ normalized rat_ norvegicus_ Bento Soares Rattus norvegicus cDNA clone RGIHN49 5' end_ mRNA sequence [AW921109]                                            | 0.21 | 0.00015 |
| A 44_P340121 | RGD1565122    | PREDICTED: Rattus norvegicus similar to tetratricopeptide repeat domain 21B (LOC295654)_ mRNA [XM_229983]                                                                                    | 0.21 | 0.00014 |
| A 42_P836392 | ELOVL6        | Rattus norvegicus ELOVL family member 6_ elongation of long chain fatty acids (yeast) (Elov16)_ mRNA [NM_134383]                                                                             | 0.21 | 0.00014 |
| A 44_P960490 | UAP1          | PREDICTED: Rattus norvegicus similar to UDP-N-acetylglucosamine pyrophosphorylase 1 homolog (LOC498272)_ mRNA [XM_573497]                                                                    | 0.21 | 0.00013 |
| A 44_P333232 | PLEKH2        | PREDICTED: Rattus norvegicus pleckstrin homology domain containing_ family F (with FYVE domain) member 2 (predicted) (Plekh2_predicted)_ mRNA [XM_342803]                                    | 0.21 | 0.00007 |
| A 42_P563648 | RGD1566025    | PREDICTED: Rattus norvegicus similar to Pin2-interacting protein X1 (LOC305963)_ mRNA [XM_224282]                                                                                            | 0.21 | 0.00003 |
| A 44_P416751 | RPA1          | PREDICTED: Rattus norvegicus replication protein A1 (predicted) (Rpa1_predicted)_ mRNA [XM_213389]                                                                                           | 0.21 | 0.00001 |
| A 44_P790750 | ENSRNOT000000 | Unknown                                                                                                                                                                                      | 0.21 | 0.00000 |
| A 43_P23188  | BF557281      | BF557281 UI-R-C0-gu-g-04-0-UI.r1 UI-R-C0 Rattus norvegicus cDNA clone UI-R-C0-gu-g-04-0-UI 5' mRNA sequence [BF557281]                                                                       | 0.21 | 0.00000 |
| A 44_P443349 | NM_001014062  | Rattus norvegicus similar to RAN protein (RGD1306195)_ mRNA [NM_001014062]                                                                                                                   | 0.2  | 0.00468 |
| A 44_P999845 | SH3KBP1       | Rattus norvegicus SH3-domain kinase binding protein 1 (Sh3kbp1)_ mRNA [NM_053360]                                                                                                            | 0.2  | 0.00437 |

|               |              |                                                                                                                                                       |      |         |
|---------------|--------------|-------------------------------------------------------------------------------------------------------------------------------------------------------|------|---------|
| A 44 P263186  | AI070126     | AI070126 UI-R-Y0-lu-d-10-0-UI.s1 UI-R-Y0 Rattus norvegicus cDNA clone UI-R-Y0-lu-d-10-0-UI 3' mRNA sequence [AI070126]                                | 0.2  | 0.00425 |
| A 44 P1005536 | L3MBTL3      | PREDICTED: Rattus norvegicus l(3)mbt-like 3 (Drosophila) (predicted) (L3mbtl3_predicted)_mRNA [XM_220113]                                             | 0.2  | 0.00384 |
| A 44 P389664  | XM_573095    | PREDICTED: Rattus norvegicus similar to High mobility group protein 1 (HMG-1) (Amphoterin) (Heparin-binding protein p30) (LOC497907)_mRNA [XM_573095] | 0.2  | 0.00380 |
| A 44 P454372  | CHD4         | PREDICTED: Rattus norvegicus chromodomain helicase DNA binding protein 4 (Chd4)_mRNA [XM_232354]                                                      | 0.2  | 0.00373 |
| A 44 P551285  | BF284167     | BF284167 EST448758 Rat Gene Index_normalized rat_ Rattus norvegicus cDNA Rattus norvegicus cDNA clone RGIEL77 3' sequence_mRNA sequence [BF284167]    | 0.2  | 0.00353 |
| A 44 P121839  | RGD1566268   | Rattus norvegicus similar to 40S ribosomal protein SA (P40) (34/67 kDa laminin receptor) (LOC366596)_mRNA [XM_345657]                                 | 0.2  | 0.00341 |
| A 44 P117471  | BE105400     | BE105400 UI-R-BO1-asn-c-12-0-UI.s1 UI-R-BO1 Rattus norvegicus cDNA clone UI-R-BO1-asn-c-12-0-UI 3' mRNA sequence [BE105400]                           | 0.2  | 0.00332 |
| A 44 P206091  | MRP63        | Rattus norvegicus similar to mitochondrial ribosomal protein 63 (LOC290285)_mRNA [XM_214181]                                                          | 0.2  | 0.00324 |
| A 44 P433003  | AI180191     | AI180191 EST223932 Normalized rat spleen_Bento Soares Rattus sp. cDNA clone RSPCR68 3' end_mRNA sequence [AI180191]                                   | 0.2  | 0.00270 |
| A 44 P136238  | AI044524     | AI044524 UI-R-C1-kc-c-11-0-UI.s1 UI-R-C1 Rattus norvegicus cDNA clone UI-R-C1-kc-c-11-0-UI 3' mRNA sequence [AI044524]                                | 0.2  | 0.00266 |
| A 44 P271650  | RAB31        | Rattus norvegicus RAB31_member RAS oncogene family (Rab31)_mRNA [NM_145094]                                                                           | 0.2  | 0.00257 |
| A 44 P324180  | RGD1306899   | PREDICTED: Rattus norvegicus similar to putative 40-2-3 protein (predicted) (RGD1306899_predicted)_mRNA [XM_340998]                                   | 0.2  | 0.00252 |
| A 44 P555418  | RGD1563099   | PREDICTED: Rattus norvegicus similar to Gcsh protein (LOC292151)_mRNA [XM_217678]                                                                     | 0.2  | 0.00228 |
| A 44 P315649  | AI102948     | AI102948 EST212237 Normalized rat embryo_Bento Soares Rattus sp. cDNA clone REMBV33 3' end_mRNA sequence [AI102948]                                   | 0.2  | 0.00193 |
| A 44 P1039165 | PHF3         | PREDICTED: Rattus norvegicus PHD finger protein 3 (predicted) (Phf3_predicted)_mRNA [XM_343548]                                                       | 0.2  | 0.00176 |
| A 44 P557857  | NM_001024245 | Rattus norvegicus gene model 631_ (NCBI) (Gm631)_mRNA [NM_001024245]                                                                                  | 0.2  | 0.00165 |
| A 44 P109927  | AHSA2        | PREDICTED: Rattus norvegicus activator of heat shock protein ATPase homolog 2 (yeast) (predicted) (Ahsa2_predicted)_mRNA [XM_223680]                  | 0.2  | 0.00164 |
| A 44 P393956  | LOC294165    | Rattus norvegicus similar to Elongation factor 2 (EF-2) (LOC294165)_mRNA [XM_227906]                                                                  | 0.2  | 0.00143 |
| A 44 P179698  | AI170794     | AI170794 EST216733 Normalized rat muscle_Bento Soares Rattus sp. cDNA clone RMUBB59 3' end_mRNA sequence [AI170794]                                   | 0.2  | 0.00133 |
| A 44 P903115  | CO395860     | AGENCOURT_26760988 NIH_MGC_255 Rattus norvegicus cDNA clone IMAGE:7318926 5' mRNA sequence [CO395860]                                                 | 0.2  | 0.00115 |
| A 44 P214054  | RNP24        | Rattus norvegicus coated vesicle membrane protein (Rnp24)_mRNA [NM_031722]                                                                            | 0.2  | 0.00089 |
| A 44 P101960  | BF408841     | BF408841 UI-R-BS2-bet-a-09-0-UI.s1 UI-R-BS2 Rattus norvegicus cDNA clone UI-R-BS2-bet-a-09-0-UI 3' mRNA sequence [BF408841]                           | 0.2  | 0.00079 |
| A 44 P524911  | XM_575397    | PREDICTED: Rattus norvegicus wingless-related MMTV integration site 2 (Wnt2)_mRNA [XM_575397]                                                         | 0.2  | 0.00072 |
| A 44 P236418  | RGD1309854   | PREDICTED: Rattus norvegicus similar to A930009M04Rik protein (predicted) (LOC294672)_mRNA [XM_226707]                                                | 0.2  | 0.00053 |
| A 44 P387604  | AI412542     | AI412542 EST240841 Normalized rat brain_Bento Soares Rattus sp. cDNA clone RBRDT47 3' end_mRNA sequence [AI412542]                                    | 0.2  | 0.00052 |
| A 44 P365462  | CACNA1D      | Rattus norvegicus calcium channel_voltage-dependent_L type_alpha 1D subunit (Cacna1d)_mRNA [NM_017298]                                                | 0.2  | 0.00050 |
| A 43 P17779   | RGD1564042   | PREDICTED: Rattus norvegicus similar to osmosis responsive factor (LOC294774)_mRNA [XM_215493]                                                        | 0.2  | 0.00041 |
| A 44 P248933  | CB547899     | CB547899 AMGNNUC:NRDG1-00063-H10-A nrdg1 (10855) Rattus norvegicus cDNA clone nrdg1-00063-h10 5' mRNA sequence [CB547899]                             | 0.2  | 0.00031 |
| A 44 P1034018 | NM_001033893 | Rattus norvegicus similar to Hypothetical protein KIAA0341 (RGD1308356)_mRNA [NM_001033893]                                                           | 0.2  | 0.00018 |
| A 44 P177169  | FGL2         | Rattus norvegicus fibrinogen-like 2 (Fgl2)_mRNA [NM_053455]                                                                                           | 0.2  | 0.00013 |
| A 44 P274433  | RGD1559620   | PREDICTED: Rattus norvegicus similar to C330016H24Rik protein (LOC314162)_mRNA [XM_234218]                                                            | 0.2  | 0.00011 |
| A 44 P159221  | RGD1563001   | PREDICTED: Rattus norvegicus similar to RIKEN cDNA 2010106G01 (LOC311401)_mRNA [XM_230567]                                                            | 0.2  | 0.00007 |
| A 44 P428708  | ODZ4         | PREDICTED: Rattus norvegicus odd Oz/ten-m homolog 4 (Drosophila) (predicted) (Odz4_predicted)_mRNA [XM_218927]                                        | 0.2  | 0.00007 |
| A 44 P231283  | NUPL1        | Rattus norvegicus nucleoporin like 1 (Nupl1)_mRNA [NM_139091]                                                                                         | 0.2  | 0.00001 |
| A 44 P732338  | TC544327     | Unknown                                                                                                                                               | -0.2 | 0.00429 |
| A 42 P535835  | NM_001037218 | Rattus norvegicus similar to scaffolding protein SLIPR (predicted) (RGD1306155_predicted)_mRNA [NM_001037218]                                         | -0.2 | 0.00399 |
| A 44 P341298  | BF396386     | BF396386 UI-R-BS2-bdx-e-06-0-UI.s1 UI-R-BS2 Rattus norvegicus cDNA clone UI-R-BS2-bdx-e-06-0-UI 3' mRNA sequence [BF396386]                           | -0.2 | 0.00317 |
| A 44 P266340  | CO559198     | AGENCOURT_28447342 NIH_MGC_248 Rattus norvegicus cDNA clone IMAGE:7367755 5' mRNA sequence [CO559198]                                                 | -0.2 | 0.00313 |
| A 44 P364620  | AB096137     | Rattus norvegicus SHARP-2 gene for enhancer of split_ and hairy-related protein-2_ complete cds [AB096137]                                            | -0.2 | 0.00295 |
| A 44 P701318  | TC525304     | Unknown                                                                                                                                               | -0.2 | 0.00229 |
| A 42 P490804  | NOL5         | Rattus norvegicus nucleolar protein 5 (Nol5)_mRNA [NM_021754]                                                                                         | -0.2 | 0.00189 |
| A 44 P478319  | RGD1565451   | PREDICTED: Rattus norvegicus similar to ring finger protein 127 (LOC298322)_mRNA [XM_233279]                                                          | -0.2 | 0.00176 |
| A 43 P11320   | RGD1307129   | Rattus norvegicus similar to RIKEN cDNA 1110020C13 (LOC363004)_mRNA [XM_343337]                                                                       | -0.2 | 0.00151 |

|               |              |                                                                                                                                                   |       |         |
|---------------|--------------|---------------------------------------------------------------------------------------------------------------------------------------------------|-------|---------|
| A_44_P77016   | NM_001024369 | Rattus norvegicus yippee-like 4 (Ypel4)_mRNA [NM_001024369]                                                                                       | -0.2  | 0.00113 |
| A_42_P586992  | RGD1560493   | PREDICTED: Rattus norvegicus similar to chromosome X open reading frame 45 (LOC315365)_mRNA [XM_235727]                                           | -0.2  | 0.00099 |
| A_44_P715994  | TC525422     | AK122203 mKIAA0093 protein {Mus musculus;} _partial (3%) [TC525422]                                                                               | -0.2  | 0.00082 |
| A_42_P465408  | SFMBT1       | Rattus norvegicus Scm-like with four mbt domains 1 (Sfmbt1)_mRNA [NM_031647]                                                                      | -0.2  | 0.00073 |
| A_44_P777874  | TC525892     | Unknown                                                                                                                                           | -0.2  | 0.00069 |
| A_42_P655425  | RGD1310204   | Rattus norvegicus similar to RIKEN cDNA 4632422M10 (LOC294711)_mRNA [XM_215474]                                                                   | -0.2  | 0.00064 |
| A_43_P11190   | PUM2         | PREDICTED: Rattus norvegicus pumilio 2 (Drosophila) (predicted) (Pum2_predicted)_mRNA [XM_216661]                                                 | -0.2  | 0.00014 |
| A_43_P14665   | DNASE1       | Rattus norvegicus deoxyribonuclease I (Dnase1)_mRNA [NM_013097]                                                                                   | -0.2  | 0.00012 |
| A_44_P189832  | MYST3        | PREDICTED: Rattus norvegicus MYST histone acetyltransferase (monocytic leukemia) 3 (predicted) (Myst3_predicted)_mRNA [XM_225008]                 | -0.2  | 0.00010 |
| A_44_P758470  | AW143744     | AW143744 EST294040 Normalized rat embryo_Bento Soares Rattus sp. cDNA clone RGIBZ35 5' end_mRNA sequence [AW143744]                               | -0.2  | 0.00002 |
| A_44_P196296  | PRG1         | Rattus norvegicus plasticity related gene 1 (Prg1)_mRNA [NM_001001508]                                                                            | -0.21 | 0.00484 |
| A_42_P534068  | ADAM15       | Rattus norvegicus a disintegrin and metalloproteinase domain 15 (metargidin) (Adam15)_mRNA [NM_020308]                                            | -0.21 | 0.00450 |
| A_44_P382727  | RGD1566215   | PREDICTED: Rattus norvegicus similar to Coatomer gamma-2 subunit (Gamma-2 coat protein) (Gamma-2 COP) (LOC301742)_mRNA [XM_217496]                | -0.21 | 0.00444 |
| A_44_P1060362 | RGD735112    | Rattus norvegicus similar to RIKEN cDNA 5830404H04 (RGD735112)_mRNA [NM_199391]                                                                   | -0.21 | 0.00423 |
| A_44_P885618  | TC526396     | Unknown                                                                                                                                           | -0.21 | 0.00401 |
| A_44_P1047628 | NM_001014064 | Rattus norvegicus similar to class II tRNA synthetase (RGD1305345)_mRNA [NM_001014064]                                                            | -0.21 | 0.00398 |
| A_44_P803822  | AW918535     | AW918535 EST349839 Rat gene index_normalized rat_norvegicus_Bento Soares Rattus norvegicus cDNA clone RGIEU47 5' end_mRNA sequence [AW918535]     | -0.21 | 0.00390 |
| A_44_P487112  | NM_001012742 | Rattus norvegicus wee 1 homolog (S. pombe) (Wee1)_mRNA [NM_001012742]                                                                             | -0.21 | 0.00384 |
| A_44_P142016  | PSEN1        | Rattus norvegicus presenilin 1 (Psen1)_mRNA [NM_019163]                                                                                           | -0.21 | 0.00355 |
| A_44_P869444  | TC540890     | Unknown                                                                                                                                           | -0.21 | 0.00344 |
| A_42_P837568  | L1CAM        | Rattus norvegicus L1 cell adhesion molecule (L1cam)_mRNA [NM_017345]                                                                              | -0.21 | 0.00341 |
| A_44_P685340  | TC558669     | Q7NP25 (Q7NP25) Glr0233 protein_partial (5%) [TC558669]                                                                                           | -0.21 | 0.00336 |
| A_44_P482629  | PCSK2        | Rattus norvegicus proprotein convertase subtilisin/kexin type 2 (Pcsk2)_mRNA [NM_012746]                                                          | -0.21 | 0.00309 |
| A_44_P822839  | TC521914     | Unknown                                                                                                                                           | -0.21 | 0.00300 |
| A_44_P1007708 | EBA9         | Rattus norvegicus estrogen receptor-binding fragment-associated gene 9 (Ebag9)_mRNA [NM_001009665]                                                | -0.21 | 0.00297 |
| A_44_P808962  | CO388128     | AGENCOURT_26623818 NIH_MGC_253 Rattus norvegicus cDNA clone IMAGE:7301443 5'_mRNA sequence [CO388128]                                             | -0.21 | 0.00294 |
| A_42_P495895  | DBN1         | Rattus norvegicus drebrin 1 (Dbn1)_mRNA [NM_031024]                                                                                               | -0.21 | 0.00287 |
| A_44_P357436  | CF109359     | Shultzomica02610 Rat lung airway and parenchyma cDNA libraries Rattus norvegicus cDNA clone Contig2265 5'_mRNA sequence [CF109359]                | -0.21 | 0.00277 |
| A_42_P556083  | CCKBR        | Rattus norvegicus cholecystokinin B receptor (Cckbr)_mRNA [NM_013165]                                                                             | -0.21 | 0.00275 |
| A_44_P741709  | BF551036     | BF551036 UI-R-C0-hi-e-08-0-UI.r2 UI-R-C0 Rattus norvegicus cDNA clone UI-R-C0-hi-e-08-0-UI 5'_mRNA sequence [BF551036]                            | -0.21 | 0.00271 |
| A_44_P792192  | TC557253     | Unknown                                                                                                                                           | -0.21 | 0.00248 |
| A_44_P794261  | TC532529     | Unknown                                                                                                                                           | -0.21 | 0.00243 |
| A_44_P533193  | AA944355     | AA944355 EST199854 Normalized rat embryo_Bento Soares Rattus sp. cDNA clone REMAF82 3' end_mRNA sequence [AA944355]                               | -0.21 | 0.00240 |
| A_44_P173960  | S68944       | S68944 Na+/Cl(-)-dependent neurotransmitter transporter [rats_brain_mRNA_3762 nt] [S68944]                                                        | -0.21 | 0.00235 |
| A_44_P430478  | AI102926     | AI102926 EST212215 Normalized rat embryo_Bento Soares Rattus sp. cDNA clone REMBV04 3' end_mRNA sequence [AI102926]                               | -0.21 | 0.00190 |
| A_44_P247312  | BF290230     | BF290230 EST454821 Rat Gene Index_normalized rat_Rattus norvegicus cDNA Rattus norvegicus cDNA clone RGIHU14 3' sequence_mRNA sequence [BF290230] | -0.21 | 0.00185 |
| A_44_P318080  | AW914945     | AW914945 EST346249 Normalized rat ovary_Bento Soares Rattus sp. cDNA clone RGIBM64 5' end_mRNA sequence [AW914945]                                | -0.21 | 0.00176 |
| A_44_P501639  | NM_001033656 | Rattus norvegicus mannosidase 1_alpha (predicted) (Man1a_predicted)_mRNA [NM_001033656]                                                           | -0.21 | 0.00172 |
| A_44_P511079  | RGD1309020   | PREDICTED: Rattus norvegicus similar to RIKEN cDNA 6530403A03 (predicted) (LOC291060)_mRNA [XM_214453]                                            | -0.21 | 0.00166 |
| A_44_P1020018 | CNOT7        | PREDICTED: Rattus norvegicus CCR4-NOT transcription complex_subunit 7 (predicted) (Cnot7_predicted)_mRNA [XM_224894]                              | -0.21 | 0.00159 |
| A_44_P1017720 | NM_001024980 | Rattus norvegicus similar to hypothetical protein MGC46719 (RGD1308412)_mRNA [NM_001024980]                                                       | -0.21 | 0.00142 |
| A_44_P628497  | BM384446     | BM384446 UI-R-CN1-cjn-m-12-0-UI.s1 UI-R-CN1 Rattus norvegicus cDNA clone UI-R-CN1-cjn-m-12-0-UI 3'_mRNA sequence [BM384446]                       | -0.21 | 0.00138 |
| A_44_P911528  | AW144361     | AW144361 EST294657 Normalized rat ovary_Bento Soares Rattus sp. cDNA clone RGICQ81 5' end_mRNA sequence [AW144361]                                | -0.21 | 0.00137 |



|               |                      |                                                                                                                                                      |       |         |
|---------------|----------------------|------------------------------------------------------------------------------------------------------------------------------------------------------|-------|---------|
| A_42_P460021  | <u>ADCY10</u>        | Rattus norvegicus adenylate cyclase 10 (soluble) (Adcy10)_ mRNA [NM_021684]                                                                          | -0.21 | 0.00129 |
| A_44_P624151  | <u>TC543922</u>      | Unknown                                                                                                                                              | -0.21 | 0.00120 |
| A_44_P885889  | <u>RGD1311958</u>    | PREDICTED: Rattus norvegicus similar to 6430514L14Rik protein (predicted) (LOC315789)_ mRNA [XM_236376]                                              | -0.21 | 0.00112 |
| A_44_P639034  | <u>TC525336</u>      | Unknown                                                                                                                                              | -0.21 | 0.00107 |
| A_44_P423813  | <u>DFNA5H</u>        | PREDICTED: Rattus norvegicus deafness_ autosomal dominant 5 homolog (human) (Dfna5h)_ mRNA [XM_231759]                                               | -0.21 | 0.00089 |
| A_42_P704429  | <u>FGF13</u>         | Rattus norvegicus fibroblast growth factor 13 (Fgf13)_ mRNA [NM_053428]                                                                              | -0.21 | 0.00087 |
| A_42_P746851  | <u>AW916157</u>      | AW916157 EST347461 Rat gene index_ normalized rat_ norvegicus_ Bento Soares Rattus norvegicus cDNA clone RGID175 5' end_ mRNA sequence [AW916157]    | -0.21 | 0.00079 |
| A_42_P721973  | <u>CB714517</u>      | AMGNNUC:URRG1-00088-F12-A urrg1 (14046) Rattus norvegicus cDNA clone urrg1-00088-f12 5'_ mRNA sequence [CB714517]                                    | -0.21 | 0.00079 |
| A_44_P699369  | <u>TC554318</u>      | Q9QM75 (Q9QM75) PX_ partial (8%) [TC554318]                                                                                                          | -0.21 | 0.00073 |
| A_44_P873549  | <u>TC550054</u>      | Unknown                                                                                                                                              | -0.21 | 0.00069 |
| A_44_P539035  | <u>NM_001013921</u>  | Rattus norvegicus similar to RIKEN cDNA 1810033A06 (RGD1311144)_ mRNA [NM_001013921]                                                                 | -0.21 | 0.00067 |
| A_44_P712590  | <u>BF287768</u>      | BF287768 EST452359 Rat Gene Index_ normalized rat_ Rattus norvegicus cDNA Rattus norvegicus cDNA clone RGIGJ80 5' sequence_ mRNA sequence [BF287768] | -0.21 | 0.00063 |
| A_44_P775534  | <u>ENSRNOT000000</u> | Unknown                                                                                                                                              | -0.21 | 0.00054 |
| A_43_P12012   | <u>CRRY</u>          | Rattus norvegicus complement receptor related protein (Crry)_ transcript variant 1_ mRNA [NM_001005330]                                              | -0.21 | 0.00044 |
| A_44_P951135  | <u>BF285915</u>      | BF285915 EST450506 Rat Gene Index_ normalized rat_ Rattus norvegicus cDNA Rattus norvegicus cDNA clone RGIFL07_ mRNA sequence [BF285915]             | -0.21 | 0.00043 |
| A_44_P172825  | <u>NRXN2</u>         | Rattus norvegicus neurexin 2 (Nrxn2)_ mRNA [NM_053846]                                                                                               | -0.21 | 0.00039 |
| A_44_P522336  | <u>NUP88</u>         | Rattus norvegicus nucleoporin 88 (Nup88)_ mRNA [NM_053616]                                                                                           | -0.21 | 0.00034 |
| A_44_P466434  | <u>RGD1306526</u>    | PREDICTED: Rattus norvegicus hypothetical LOC310764 (predicted) (LOC310764)_ mRNA [XM_227559]                                                        | -0.21 | 0.00034 |
| A_44_P988046  | <u>BG668924</u>      | BG668924 DRN03C03 Rat DRG Library Rattus norvegicus cDNA clone DRN03C03 5'_ mRNA sequence [BG668924]                                                 | -0.21 | 0.00029 |
| A_43_P10703   | <u>TC535255</u>      | Q96QA3 (Q96QA3) FKSG11_ partial (93%) [TC535255]                                                                                                     | -0.21 | 0.00027 |
| A_44_P991045  | <u>RGD1359460</u>    | Rattus norvegicus MMR_HSR1 domain containing protein RGD1359460 (RGD1359460)_ mRNA [NM_001006959]                                                    | -0.21 | 0.00025 |
| A_44_P245950  | <u>RGD1561038</u>    | PREDICTED: Rattus norvegicus similar to HECT type E3 ubiquitin ligase (LOC291209)_ mRNA [XM_225450]                                                  | -0.21 | 0.00025 |
| A_44_P782378  | <u>AI555172</u>      | AI555172 UI-R-C2p-qt-f-05-UI.s1 UI-R-C2p Rattus norvegicus cDNA clone UI-R-C2p-qt-f-05-UI 3'_ mRNA sequence [AI555172]                               | -0.21 | 0.00022 |
| A_44_P697832  | <u>AW920624</u>      | AW920624 Rat gene index_ normalized rat_ norvegicus_ Bento Soares Rattus norvegicus cDNA clone RGIGZ92 5' end_ mRNA sequence [AW920624]              | -0.21 | 0.00013 |
| A_44_P991114  | <u>APRIN</u>         | PREDICTED: Rattus norvegicus androgen-induced proliferation inhibitor (predicted) (Aprin_predicted)_ mRNA [XM_221833]                                | -0.21 | 0.00012 |
| A_43_P11497   | <u>PTPN1</u>         | Rattus norvegicus protein tyrosine phosphatase_ non-receptor type 1 (Ptpn1)_ mRNA [NM_012637]                                                        | -0.21 | 0.00008 |
| A_44_P1036881 | <u>BF563262</u>      | UI-R-BO1-ajh-h-04-0-UI.r1 UI-R-BO1 Rattus norvegicus cDNA clone UI-R-BO1-ajh-h-04-0-UI 5'_ mRNA sequence [BF563262]                                  | -0.21 | 0.00003 |
| A_44_P612277  | <u>BC098799</u>      | Rattus norvegicus cDNA clone IMAGE:7375955 [BC098799]                                                                                                | -0.21 | 0.00003 |
| A_44_P295669  | <u>RBM27</u>         | PREDICTED: Rattus norvegicus RNA binding motif protein 27 (predicted) (Rbm27_predicted)_ mRNA [XM_341605]                                            | -0.21 | 0.00003 |
| A_44_P264558  | <u>DEK</u>           | Rattus norvegicus DEK oncogene (DNA binding) (Dek)_ mRNA [NM_001004255]                                                                              | -0.21 | 0.00002 |
| A_42_P831552  | <u>RGD1309934</u>    | PREDICTED: Rattus norvegicus similar to Smhs2 homolog (predicted) (LOC361048)_ mRNA [XM_341328]                                                      | -0.21 | 0.00001 |
| A_42_P734842  | <u>CX569261</u>      | RVL191 Wackym-Soares normalized rat vestibular cDNA library Rattus norvegicus cDNA 5'_ mRNA sequence [CX569261]                                      | -0.21 | 0.00001 |
| A_44_P975848  | <u>TC556684</u>      | T38738 major facilitator homolog transporter - fission yeast (Schizosaccharomyces pombe) {Schizosaccharomyces pombe;} _ partial (4%) [TC556684]      | -0.22 | 0.00434 |
| A_44_P714618  | <u>TC554007</u>      | Q82XD0 (Q82XD0) Biopolymer transport protein ExbD/TolR_ partial (12%) [TC554007]                                                                     | -0.22 | 0.00424 |
| A_44_P540738  | <u>MATR3</u>         | Rattus norvegicus matrin 3 (Matr3)_ mRNA [NM_019149]                                                                                                 | -0.22 | 0.00362 |
| A_44_P945829  | <u>TC523525</u>      | DMBN4L24 BACN4L24.e {Drosophila melanogaster;} _ partial (9%) [TC523525]                                                                             | -0.22 | 0.00351 |
| A_44_P349702  | <u>RGD1565814</u>    | PREDICTED: Rattus norvegicus hypothetical LOC299262 (LOC299262)_ mRNA [XM_238465]                                                                    | -0.22 | 0.00349 |
| A_44_P665677  | <u>BF566488</u>      | BF566488 UI-R-BT1-akg-h-07-0-UI.r1 UI-R-BT1 Rattus norvegicus cDNA clone UI-R-BT1-akg-h-07-0-UI 5'_ mRNA sequence [BF566488]                         | -0.22 | 0.00337 |
| A_43_P10498   | <u>ZFP451</u>        | Rattus norvegicus similar to zinc finger protein 451; coactivator for steroid receptors (LOC316312)_ mRNA [XM_237039]                                | -0.22 | 0.00319 |
| A_44_P364005  | <u>AW920322</u>      | AW920322 EST351626 Rat gene index_ normalized rat_ norvegicus_ Bento Soares Rattus norvegicus cDNA clone RGIGU02 5' end_ mRNA sequence [AW920322]    | -0.22 | 0.00311 |
| A_44_P730150  | <u>TC556399</u>      | Unknown                                                                                                                                              | -0.22 | 0.00298 |
| A_44_P655158  | <u>TC528434</u>      | Unknown                                                                                                                                              | -0.22 | 0.00296 |
| A_42_P479312  | <u>RBM5</u>          | Rattus norvegicus similar to RNA binding motif protein 5 (LOC300996)_ mRNA [XM_217263]                                                               | -0.22 | 0.00280 |

|               |              |                                                                                                                                                                                    |       |         |
|---------------|--------------|------------------------------------------------------------------------------------------------------------------------------------------------------------------------------------|-------|---------|
| A_43_P14365   | BS69         | Rattus norvegicus BS69 protein (BS69)_ transcript variant 3_ mRNA [NM_203369]                                                                                                      | -0.22 | 0.00248 |
| A_44_P791927  | TC555896     | SEP3_MOUSE (Q9Z1S5) Neuronal-specific septin 3_ partial (8%) [TC555896]                                                                                                            | -0.22 | 0.00239 |
| A_44_P393202  | BG670036     | BG670036 DRNAEOE10 Rat DRG Library Rattus norvegicus cDNA clone DRNAEOE10 5'_ mRNA sequence [BG670036]                                                                             | -0.22 | 0.00238 |
| A_42_P781585  | NM_001037554 | Rattus norvegicus brain expressed X-linked 4 (Bex4)_ mRNA [NM_001037554]                                                                                                           | -0.22 | 0.00186 |
| A_44_P480390  | RGD1565281   | PREDICTED: Rattus norvegicus similar to Seizure related 6 homolog (mouse)-like 2 (LOC308988)_ mRNA [XM_219339]                                                                     | -0.22 | 0.00173 |
| A_44_P526795  | AW919696     | AW919696 EST351000 Rat gene index_ normalized rat_ norvegicus_ Bento Soares Rattus norvegicus cDNA clone RGIGF76 5' end_ mRNA sequence [AW919696]                                  | -0.22 | 0.00149 |
| A_44_P215056  | ITPR1        | Rattus norvegicus inositol 1_4_5-triphosphate receptor 1 (Itpr1)_ mRNA [NM_001007235]                                                                                              | -0.22 | 0.00139 |
| A_44_P485271  | PCDHB9       | Rattus norvegicus similar to protocadherin beta 9 (LOC307490)_ mRNA [XM_226046]                                                                                                    | -0.22 | 0.00115 |
| A_44_P946927  | TC545669     | Unknown                                                                                                                                                                            | -0.22 | 0.00089 |
| A_44_P700864  | TC558541     | Q8CAN1 (Q8CAN1) Mus musculus adult male hypothalamus cDNA_ RIKEN full-length enriched library_ clone:A230005O06 product:syntaxin 3_ full insert sequence_ partial (11%) [TC558541] | -0.22 | 0.00057 |
| A_44_P905337  | A_44_P905337 | Unknown                                                                                                                                                                            | -0.22 | 0.00029 |
| A_44_P411771  | AW914928     | AW914928 EST346232 Normalized rat ovary_ Bento Soares Rattus sp. cDNA clone RGIBM43 5' end_ mRNA sequence [AW914928]                                                               | -0.22 | 0.00029 |
| A_44_P413265  | AA875527     | AA875527 UI-R-E0-cv-f-07-0-UI.s1 UI-R-E0 Rattus norvegicus cDNA clone UI-R-E0-cv-f-07-0-UI 3'_ mRNA sequence [AA875527]                                                            | -0.22 | 0.00020 |
| A_44_P493791  | AI172537     | AI172537 UI-R-C2p-nu-h-04-0-UI.s1 UI-R-C2p Rattus norvegicus cDNA clone UI-R-C2p-nu-h-04-0-UI 3'_ mRNA sequence [AI172537]                                                         | -0.22 | 0.00006 |
| A_44_P980830  | A_44_P980830 | Unknown                                                                                                                                                                            | -0.22 | 0.00002 |
| A_44_P637889  | TC520832     | Unknown                                                                                                                                                                            | -0.22 | 0.00002 |
| A_44_P670412  | TC546050     | Unknown                                                                                                                                                                            | -0.22 | 0.00001 |
| A_43_P17094   | XM_216376    | Rattus norvegicus similar to testes development-related NYD-SP22 isoform 1 (LOC297999)_ mRNA [XM_216376]                                                                           | -0.23 | 0.00487 |
| A_42_P709819  | AW921546     | AW921546 EST352850 Rat gene index_ normalized rat_ norvegicus_ Bento Soares Rattus norvegicus cDNA clone RGIIA63 5' end_ mRNA sequence [AW921546]                                  | -0.23 | 0.00482 |
| A_44_P450055  | RGD1562437   | PREDICTED: Rattus norvegicus similar to transcription elongation regulator 1-like (LOC361669)_ mRNA [XM_341952]                                                                    | -0.23 | 0.00443 |
| A_44_P948572  | TC526296     | SYA_AQUAE (O67632) Tyrosyl-tRNA synthetase (Tyrosine--tRNA ligase) (TyrRS) _ partial (5%) [TC526296]                                                                               | -0.23 | 0.00433 |
| A_44_P1021246 | AA965157     | AA965157 UI-R-C0-hc-h-12-0-UI.s1 UI-R-C0 Rattus norvegicus cDNA clone UI-R-C0-hc-h-12-0-UI 3'_ mRNA sequence [AA965157]                                                            | -0.23 | 0.00412 |
| A_44_P745881  | TC556244     | Unknown                                                                                                                                                                            | -0.23 | 0.00379 |
| A_44_P509588  | BG665790     | BG665790 DRACIF10 Rat DRG Library Rattus norvegicus cDNA clone DRACIF10 5'_ mRNA sequence [BG665790]                                                                               | -0.23 | 0.00363 |
| A_44_P705817  | TC557120     | Unknown                                                                                                                                                                            | -0.23 | 0.00341 |
| A_44_P987888  | AW914294     | AW914294 EST345598 Normalized rat brain_ Bento Soares Rattus sp. cDNA clone RGIAD11 5' end_ mRNA sequence [AW914294]                                                               | -0.23 | 0.00329 |
| A_44_P776823  | TC556638     | Unknown                                                                                                                                                                            | -0.23 | 0.00305 |
| A_44_P370015  | PGRMC1       | Rattus norvegicus progesterone receptor membrane component 1 (Pgrmc1)_ mRNA [NM_021766]                                                                                            | -0.23 | 0.00301 |
| A_44_P371952  | AW143923     | AW143923 EST294219 Normalized rat embryo_ Bento Soares Rattus sp. cDNA clone RGICD08 5' end_ mRNA sequence [AW143923]                                                              | -0.23 | 0.00284 |
| A_44_P871255  | TC549709     | Unknown                                                                                                                                                                            | -0.23 | 0.00275 |
| A_44_P261599  | AA997406     | AA997406 UI-R-C0-hr-e-04-0-UI.s1 UI-R-C0 Rattus norvegicus cDNA clone UI-R-C0-hr-e-04-0-UI 3'_ mRNA sequence [AA997406]                                                            | -0.23 | 0.00273 |
| A_44_P612186  | TC555449     | Unknown                                                                                                                                                                            | -0.23 | 0.00252 |
| A_44_P998234  | BF550555     | BF550555 UI-R-C0-jj-h-03-0-UI.r1 UI-R-C0 Rattus norvegicus cDNA clone UI-R-C0-jj-h-03-0-UI 5'_ mRNA sequence [BF550555]                                                            | -0.23 | 0.00201 |
| A_44_P1042754 | SLC7A10      | Rattus norvegicus solute carrier family 7 (cationic amino acid transporter_ y+ system)_ member 10 (Slc7a10)_ mRNA [NM_053726]                                                      | -0.23 | 0.00196 |
| A_44_P513058  | AF053360     | Rattus norvegicus nonmuscle tropomyosin 5 (Tpm5) isoforms NM 8 and NM 9 mRNA_ partial cds. [AF053360]                                                                              | -0.23 | 0.00173 |
| A_44_P227994  | ITPKA        | Rattus norvegicus inositol 1_4_5-trisphosphate 3-kinase A (Itпка)_ mRNA [NM_031045]                                                                                                | -0.23 | 0.00152 |
| A_44_P870143  | TC526172     | Unknown                                                                                                                                                                            | -0.23 | 0.00111 |
| A_44_P439995  | MKL1         | PREDICTED: Rattus norvegicus megakaryoblastic leukemia (translocation) 1 (predicted) (Mkl1_predicted)_ mRNA [XM_235497]                                                            | -0.23 | 0.00088 |
| A_43_P14705   | TC541677     | Unknown                                                                                                                                                                            | -0.23 | 0.00088 |
| A_43_P13843   | CA503916     | CA503916 UI-R-FS1-cqe-c-18-0-UI.s1 NCI_CGAP_FS1 Rattus norvegicus cDNA clone IMAGE:7361708 3'_ mRNA sequence [CA503916]                                                            | -0.23 | 0.00079 |
| A_44_P486446  | D00634       | RATB1ARA Rattus norvegicus gene for beta-1 adrenergic receptor_ complete cds [D00634]                                                                                              | -0.23 | 0.00072 |
| A_44_P342245  | RGD1565602   | PREDICTED: Rattus norvegicus similar to PLU1 (LOC304809)_ mRNA [XM_239761]                                                                                                         | -0.23 | 0.00070 |
| A_44_P792368  | TC523218     | Q6NGM7 (Q6NGM7) Prolyl-tRNA synthetase _ partial (3%) [TC523218]                                                                                                                   | -0.23 | 0.00063 |

|               |              |                                                                                                                                                                                        |       |         |
|---------------|--------------|----------------------------------------------------------------------------------------------------------------------------------------------------------------------------------------|-------|---------|
| A 44 P995887  | TC555895     | Unknown                                                                                                                                                                                | -0.23 | 0.00046 |
| A 42 P566457  | NM_001033931 | Rattus norvegicus germ cell-less protein (Gcl)_ transcript variant 1_ mRNA [NM_001033931]                                                                                              | -0.23 | 0.00038 |
| A 44 P183908  | BG664811     | BG664811 DRABLE10 Rat DRG Library Rattus norvegicus cDNA clone DRABLE10 5' mRNA sequence [BG664811]                                                                                    | -0.23 | 0.00027 |
| A 44 P483522  | AA899721     | AA899721 UI-R-E0-dg-c-07-0-UI.s1 UI-R-E0 Rattus norvegicus cDNA clone UI-R-E0-dg-c-07-0-UI 3' similar to gi [AA899721]                                                                 | -0.23 | 0.00025 |
| A 44 P288997  | AW916759     | AW916759 EST348167 Rat gene index_ normalized rat_ norvegicus_ Bento Soares Rattus norvegicus cDNA clone RGIDV89 5' end_ mRNA sequence [AW916759]                                      | -0.23 | 0.00021 |
| A 44 P423490  | NM_001025688 | Rattus norvegicus palmdelphin (Palmd)_ mRNA [NM_001025688]                                                                                                                             | -0.23 | 0.00016 |
| A 43 P15169   | TC551865     | Unknown                                                                                                                                                                                | -0.23 | 0.00013 |
| A 44 P125025  | TGFB3        | Rattus norvegicus transforming growth factor_ beta 3 (Tgfb3)_ mRNA [NM_013174]                                                                                                         | -0.23 | 0.00012 |
| A 43 P10901   | ITM2C        | Rattus norvegicus integral membrane protein 2C (Itm2c)_ mRNA [NM_001009674]                                                                                                            | -0.23 | 0.00010 |
| A 44 P956070  | AW143079     | AW143079 EST293375 Normalized rat brain_ Bento Soares Rattus sp. cDNA clone RGIBD09 5' end_ mRNA sequence [AW143079]                                                                   | -0.23 | 0.00007 |
| A 42 P650386  | NM_001034127 | Rattus norvegicus asparagine-linked glycosylation 8 homolog (yeast_ alpha-1_3-glucosyltransferase) (Alg8)_ mRNA [NM_001034127]                                                         | -0.23 | 0.00005 |
| A 44 P914137  | A 44 P914137 | Unknown                                                                                                                                                                                | -0.23 | 0.00004 |
| A 44 P1020311 | RGD1562629   | PREDICTED: Rattus norvegicus similar to neurobeachin (LOC361948)_ mRNA [XM_342248]                                                                                                     | -0.23 | 0.00002 |
| A 42 P585995  | RGD1308116   | PREDICTED: Rattus norvegicus similar to hypothetical protein MGC42105 (predicted) (LOC310376)_ mRNA [XM_227081]                                                                        | -0.23 | 0.00000 |
| A 44 P827099  | TC566302     | Q8BU53 (Q8BU53) Mus musculus 2 days pregnant adult female oviduct cDNA_ RIKEN full-length enriched library_ clone:E230038K10 product:procollagen-proline_ 2-oxoglutarate 4-dioxygenase | -0.24 | 0.00474 |
| A 44 P960576  | TC539128     | Q89KT0 (Q89KT0) L-lactate dehydrogenase_ partial (6%) [TC539128]                                                                                                                       | -0.24 | 0.00470 |
| A 42 P460340  | MAL2         | Rattus norvegicus mal_ T-cell differentiation protein 2 (Mal2)_ mRNA [NM_198786]                                                                                                       | -0.24 | 0.00430 |
| A 44 P588098  | AI555277     | AI555277 UI-R-C2p-qq-a-04-0-UI.s1 UI-R-C2p Rattus norvegicus cDNA clone UI-R-C2p-qq-a-04-0-UI 3' mRNA sequence [AI555277]                                                              | -0.24 | 0.00415 |
| A 43 P14310   | NR2F1        | Rattus norvegicus nuclear receptor subfamily 2_ group F_ member 1 (Nr2f1)_ mRNA [NM_031130]                                                                                            | -0.24 | 0.00370 |
| A 44 P717825  | TC542591     | Unknown                                                                                                                                                                                | -0.24 | 0.00346 |
| A 44 P849099  | AW915979     | AW915979 EST347283 Rat gene index_ normalized rat_ norvegicus_ Bento Soares Rattus norvegicus cDNA clone RGIDE47 5' end_ mRNA sequence [AW915979]                                      | -0.24 | 0.00325 |
| A 44 P236539  | RGD1309219   | Rattus norvegicus similar to hypothetical protein HSPC129 (LOC311368)_ mRNA [XM_230521]                                                                                                | -0.24 | 0.00301 |
| A 44 P761066  | NM_001014250 | Rattus norvegicus similar to autophagy 5-like (LOC365601)_ mRNA [NM_001014250]                                                                                                         | -0.24 | 0.00297 |
| A 44 P295680  | AI385133     | AI385133 UI-R-A0-ay-f-02-0-UI.s1 UI-R-A0 Rattus norvegicus cDNA clone UI-R-A0-ay-f-02-0-UI 3' mRNA sequence [AI385133]                                                                 | -0.24 | 0.00282 |
| A 44 P683778  | TC536099     | Q62710 (Q62710) Nitric oxide synthase_ partial (34%) [TC536099]                                                                                                                        | -0.24 | 0.00263 |
| A 44 P392846  | COL5A2       | Rattus norvegicus mRNA for collagen alpha 2 type V_ partial CDS. [AJ224880]                                                                                                            | -0.24 | 0.00162 |
| A 44 P1014527 | ALMS1        | Rattus norvegicus similar to Almstrom syndrome 1 protein (LOC297408)_ mRNA [XM_216189]                                                                                                 | -0.24 | 0.00144 |
| A 44 P655502  | TC567885     | Unknown                                                                                                                                                                                | -0.24 | 0.00140 |
| A 44 P998423  | TC552297     | P24_HUMAN (Q15363) Cop-coated vesicle membrane protein p24 precursor (p24A)_ partial (18%) [TC552297]                                                                                  | -0.24 | 0.00129 |
| A 44 P930999  | TC543232     | Unknown                                                                                                                                                                                | -0.24 | 0.00122 |
| A 44 P292419  | AA944408     | AA944408 EST199907 Normalized rat embryo_ Bento Soares Rattus sp. cDNA clone REMAG71 3' end_ mRNA sequence [AA944408]                                                                  | -0.24 | 0.00106 |
| A 44 P469780  | AW915217     | AW915217 EST346521 Normalized rat embryo_ Bento Soares Rattus sp. cDNA clone RGICM68 5' end_ mRNA sequence [AW915217]                                                                  | -0.24 | 0.00090 |
| A 44 P716457  | BP482588     | BP482588 Rattus norvegicus pancreatic islet Rattus norvegicus cDNA clone RBC00282 5' mRNA sequence [BP482588]                                                                          | -0.24 | 0.00089 |
| A 44 P564669  | TC544957     | Unknown                                                                                                                                                                                | -0.24 | 0.00080 |
| A 44 P654363  | TC525338     | Unknown                                                                                                                                                                                | -0.24 | 0.00069 |
| A 44 P622334  | DV722810     | RVL14474 Wackym-Soares normalized rat vestibular cDNA library Rattus norvegicus cDNA 5' mRNA sequence [DV722810]                                                                       | -0.24 | 0.00049 |
| A 42 P739860  | DUSP5        | Rattus norvegicus dual specificity phosphatase 5 (Dusp5)_ mRNA [NM_133578]                                                                                                             | -0.24 | 0.00048 |
| A 44 P761087  | TC519944     | Unknown                                                                                                                                                                                | -0.24 | 0.00036 |
| A 44 P269457  | GPR83        | Rattus norvegicus G protein-coupled receptor 83 (Gpr83)_ mRNA [NM_080411]                                                                                                              | -0.24 | 0.00035 |
| A 44 P791729  | TC520825     | Unknown                                                                                                                                                                                | -0.24 | 0.00033 |
| A 43 P10955   | TC523349     | Unknown                                                                                                                                                                                | -0.24 | 0.00031 |
| A 44 P182136  | AI556689     | AI556689 UI-R-C2p-rj-c-12-0-UI.s1 UI-R-C2p Rattus norvegicus cDNA clone UI-R-C2p-rj-c-12-0-UI 3' mRNA sequence [AI556689]                                                              | -0.24 | 0.00017 |
| A 44 P609775  | DV725920     | RVL18161 Wackym-Soares normalized rat vestibular cDNA library Rattus norvegicus cDNA 5' mRNA sequence [DV725920]                                                                       | -0.24 | 0.00014 |

|               |                              |                                                                                                                                                                                  |       |         |
|---------------|------------------------------|----------------------------------------------------------------------------------------------------------------------------------------------------------------------------------|-------|---------|
| A_44_P822616  | <a href="#">XM_576312</a>    | PREDICTED: Rattus norvegicus E1A binding protein p300 (Ep300)_ mRNA [XM_576312]                                                                                                  | -0.24 | 0.00003 |
| A_44_P945336  | <a href="#">TC538946</a>     | Unknown                                                                                                                                                                          | -0.24 | 0.00002 |
| A_44_P962886  | <a href="#">TC533990</a>     | Unknown                                                                                                                                                                          | -0.24 | 0.00001 |
| A_44_P290966  | <a href="#">RGD1565392</a>   | PREDICTED: Rattus norvegicus similar to Protocadherin 19 precursor (LOC317183)_ mRNA [XM_228429]                                                                                 | -0.24 | 0.00001 |
| A_44_P671137  | <a href="#">TC549952</a>     | Q9ERK2 (Q9ERK2) Nephrilysin-like peptidase gamma_partial (3%) [TC549952]                                                                                                         | -0.24 | 0.00001 |
| A_42_P717631  | <a href="#">AI230097</a>     | AI230097 EST226792 Normalized rat embryo_Bento Soares Rattus sp. cDNA clone REMCR05 3' end_ mRNA sequence [AI230097]                                                             | -0.24 | 0.00000 |
| A_42_P800949  | <a href="#">HIPK3</a>        | Rattus norvegicus homeodomain interacting protein kinase 3 (Hipk3)_ mRNA [NM_031787]                                                                                             | -0.25 | 0.00435 |
| A_44_P599219  | <a href="#">AI556563</a>     | AI556563 UI-R-C2p-rm-f-03-0-UI.s1 UI-R-C2p Rattus norvegicus cDNA clone UI-R-C2p-rm-f-03-0-UI 3'_ mRNA sequence [AI556563]                                                       | -0.25 | 0.00381 |
| A_44_P302944  | <a href="#">PEM</a>          | Rattus norvegicus placenta and embryos oncofetal gene (Pem)_ mRNA [NM_022175]                                                                                                    | -0.25 | 0.00345 |
| A_42_P727022  | <a href="#">RAB40B</a>       | PREDICTED: Rattus norvegicus Rab40b_member RAS oncogene family (predicted) (Rab40b_predicted)_ mRNA [XM_221213]                                                                  | -0.25 | 0.00255 |
| A_44_P200690  | <a href="#">BM986264</a>     | BM986264 EST531718 Rat gene index_normalized rat_norvegicus Rattus norvegicus cDNA clone RGIAD14 3' end similar to ubiquitin-conjugating enzyme UbcE2A_ mRNA sequence [BM986264] | -0.25 | 0.00250 |
| A_44_P339571  | <a href="#">BTG3</a>         | Rattus norvegicus B-cell translocation gene 3 (Btg3)_ mRNA [NM_019290]                                                                                                           | -0.25 | 0.00248 |
| A_43_P14131   | <a href="#">RGS2</a>         | Rattus norvegicus regulator of G-protein signaling 2 (Rgs2)_ mRNA [NM_053453]                                                                                                    | -0.25 | 0.00215 |
| A_43_P18464   | <a href="#">XM_221871</a>    | Rattus norvegicus similar to KIAA0774 protein (LOC304259)_ mRNA [XM_221871]                                                                                                      | -0.25 | 0.00202 |
| A_44_P980916  | <a href="#">AW142820</a>     | AW142820 EST293074 Normalized rat brain_Bento Soares Rattus sp. cDNA clone RGIAW35 5' end_ mRNA sequence [AW142820]                                                              | -0.25 | 0.00200 |
| A_44_P261473  | <a href="#">BC089934</a>     | Rattus norvegicus cDNA clone IMAGE:7309127 [BC089934]                                                                                                                            | -0.25 | 0.00199 |
| A_44_P777173  | <a href="#">NM_001013984</a> | Rattus norvegicus similar to N-acetylneuraminase pyruvate lyase (LOC304860)_ mRNA [NM_001013984]                                                                                 | -0.25 | 0.00192 |
| A_44_P461857  | <a href="#">RGD1566024</a>   | PREDICTED: Rattus norvegicus similar to 40S ribosomal protein S2 (LOC366237)_ mRNA [XM_345460]                                                                                   | -0.25 | 0.00161 |
| A_44_P962890  | <a href="#">TC533990</a>     | Unknown                                                                                                                                                                          | -0.25 | 0.00160 |
| A_44_P513360  | <a href="#">CDKN3</a>        | PREDICTED: Rattus norvegicus cyclin-dependent kinase inhibitor 3 (predicted) (Cdkn3_predicted)_ mRNA [XM_214152]                                                                 | -0.25 | 0.00151 |
| A_44_P376043  | <a href="#">BF390703</a>     | BF390703 UI-R-CA1-bco-d-09-0-UI.s1 UI-R-CA1 Rattus norvegicus cDNA clone UI-R-CA1-bco-d-09-0-UI 3'_ mRNA sequence [BF390703]                                                     | -0.25 | 0.00145 |
| A_44_P437956  | <a href="#">STC1</a>         | Rattus norvegicus stanniocalcin 1 (Stc1)_ mRNA [NM_031123]                                                                                                                       | -0.25 | 0.00143 |
| A_44_P761679  | <a href="#">BF550875</a>     | BF550875 UI-R-C1-jy-d-12-0-UI.r1 UI-R-C1 Rattus norvegicus cDNA clone UI-R-C1-jy-d-12-0-UI 5'_ mRNA sequence [BF550875]                                                          | -0.25 | 0.00104 |
| A_44_P497107  | <a href="#">RGD1305604</a>   | PREDICTED: Rattus norvegicus similar to CG2919-PA (predicted) (LOC362580)_ mRNA [XM_342899]                                                                                      | -0.25 | 0.00094 |
| A_42_P592144  | <a href="#">FATH</a>         | Rattus norvegicus fat tumor suppressor homolog (Drosophila) (Fath)_ mRNA [NM_031819]                                                                                             | -0.25 | 0.00084 |
| A_44_P808142  | <a href="#">TC525053</a>     | Unknown                                                                                                                                                                          | -0.25 | 0.00076 |
| A_44_P700360  | <a href="#">DV719388</a>     | RVL10156 Wackym-Soares normalized rat vestibular cDNA library Rattus norvegicus cDNA 5'_ mRNA sequence [DV719388]                                                                | -0.25 | 0.00069 |
| A_44_P452114  | <a href="#">GLS</a>          | Rattus norvegicus kidney-type glutaminase GAC isoform mRNA_partial cds. [AY083459]                                                                                               | -0.25 | 0.00065 |
| A_44_P849334  | <a href="#">DV719405</a>     | RVL10173 Wackym-Soares normalized rat vestibular cDNA library Rattus norvegicus cDNA 5'_ mRNA sequence [DV719405]                                                                | -0.25 | 0.00057 |
| A_43_P15205   | <a href="#">XM_576514</a>    | PREDICTED: Rattus norvegicus similar to serum response factor (LOC501099)_ mRNA [XM_576514]                                                                                      | -0.25 | 0.00050 |
| A_43_P10648   | <a href="#">TC538971</a>     | O22514 (O22514) Proline rich protein_partial (9%) [TC538971]                                                                                                                     | -0.25 | 0.00047 |
| A_43_P10156   | <a href="#">AW143833</a>     | EST294129 Normalized rat embryo_Bento Soares Rattus sp. cDNA clone RIGIB09 5' end_ mRNA sequence [AW143833]                                                                      | -0.25 | 0.00042 |
| A_43_P11288   | <a href="#">RGD1562991</a>   | PREDICTED: Rattus norvegicus similar to UCH37-interacting protein 1 (LOC293844)_ mRNA [XM_215225]                                                                                | -0.25 | 0.00037 |
| A_44_P917235  | <a href="#">TC566914</a>     | Unknown                                                                                                                                                                          | -0.25 | 0.00036 |
| A_44_P563512  | <a href="#">TC527750</a>     | Unknown                                                                                                                                                                          | -0.25 | 0.00033 |
| A_44_P1025861 | <a href="#">AA956888</a>     | AA956888 UI-R-E1-fr-a-07-0-UI.s1 UI-R-E1 Rattus norvegicus cDNA clone UI-R-E1-fr-a-07-0-UI 3' similar to gi [AA956888]                                                           | -0.25 | 0.00021 |
| A_44_P884231  | <a href="#">TC555441</a>     | Unknown                                                                                                                                                                          | -0.25 | 0.00015 |
| A_43_P14347   | <a href="#">TC522163</a>     | Unknown                                                                                                                                                                          | -0.25 | 0.00014 |
| A_44_P363549  | <a href="#">NOPD1</a>        | PREDICTED: Rattus norvegicus nucleolar protein (NOL1/NOP2/sun) and PUA domains 1 (predicted) (Nopd1_predicted)_ mRNA [XM_225588]                                                 | -0.25 | 0.00011 |
| A_44_P199597  | <a href="#">CB544987</a>     | CB544987 AMGNNUC:MRBE3-00114-H1-A rat brain E15 (10374) Rattus norvegicus cDNA clone mrbe3-00114-h1 5'_ mRNA sequence [CB544987]                                                 | -0.25 | 0.00008 |
| A_44_P214811  | <a href="#">AW914888</a>     | AW914888 EST346192 Normalized rat ovary_Bento Soares Rattus sp. cDNA clone RIGIB83 5' end_ mRNA sequence [AW914888]                                                              | -0.25 | 0.00007 |
| A_42_P816402  | <a href="#">WDR31</a>        | Rattus norvegicus WD repeat domain 31 (Wdr31)_ mRNA [NM_001011976]                                                                                                               | -0.25 | 0.00006 |
| A_44_P199597  | <a href="#">CB544987</a>     | CB544987 AMGNNUC:MRBE3-00114-H1-A rat brain E15 (10374) Rattus norvegicus cDNA clone mrbe3-00114-h1 5'_ mRNA sequence [CB544987]                                                 | -0.25 | 0.00006 |

|               |              |                                                                                                                                                                          |       |         |
|---------------|--------------|--------------------------------------------------------------------------------------------------------------------------------------------------------------------------|-------|---------|
| A_44_P125443  | BF289687     | BF289687 EST454278 Rat Gene Index_ normalized rat_ Rattus norvegicus cDNA Rattus norvegicus cDNA clone RGIHJ84_ mRNA sequence [BF289687]                                 | -0.25 | 0.00005 |
| A_44_P546170  | UBE2H        | Rattus norvegicus similar to Ubiquitin-conjugating enzyme E2 H (Ubiquitin-protein ligase H) (Ubiquitin carrier protein H) (UBCH2) (E2-20K) (LOC296956)_ mRNA [XM_216109] | -0.25 | 0.00004 |
| A_43_P10127   | MGC94335     | Rattus norvegicus similar to hypothetical protein FLJ22555 (MGC94335)_ mRNA [NM_001004251]                                                                               | -0.25 | 0.00003 |
| A_44_P940501  | AW143282     | AW143282 EST293578 Normalized rat brain_ Bento Soares Rattus sp. cDNA clone RGIJ40 5' end_ mRNA sequence [AW143282]                                                      | -0.25 | 0.00003 |
| A_44_P702390  | TC554784     | Unknown                                                                                                                                                                  | -0.25 | 0.00003 |
| A_42_P648006  | AW915161     | AW915161 EST346465 Normalized rat embryo_ Bento Soares Rattus sp. cDNA clone RGICL49 5' end_ mRNA sequence [AW915161]                                                    | -0.25 | 0.00001 |
| A_44_P837846  | DV723320     | RVL15080 Wackym-Soares normalized rat vestibular cDNA library Rattus norvegicus cDNA 5'_ mRNA sequence [DV723320]                                                        | -0.25 | 0.00001 |
| A_44_P1008607 | ACTR3        | Rattus norvegicus actin-related protein 3 homolog (yeast) (Actr3)_ mRNA [XM_341112]                                                                                      | -0.25 | 0.00001 |
| A_42_P591516  | AA998612     | AA998612 UI-R-C0-if-c-06-0-UI.s1 UI-R-C0 Rattus norvegicus cDNA clone UI-R-C0-if-c-06-0-UI 3'_ mRNA sequence [AA998612]                                                  | -0.25 | 0.00001 |
| A_44_P776252  | TC553461     | Q9ERK2 (Q9ERK2) Neprilysin-like peptidase gamma_ partial (3%) [TC553461]                                                                                                 | -0.25 | 0.00000 |
| A_44_P705949  | TC541148     | Unknown                                                                                                                                                                  | -0.26 | 0.00497 |
| A_44_P607517  | TC541045     | Q70R55 (Q70R55) Gp120 protein (Fragment)_ partial (7%) [TC541045]                                                                                                        | -0.26 | 0.00452 |
| A_44_P1019710 | NM_001024745 | Rattus norvegicus solute carrier family 39 (metal ion transporter)_ member 6 (Slc39a6)_ mRNA [NM_001024745]                                                              | -0.26 | 0.00383 |
| A_44_P240731  | ADCYAP1      | Rattus norvegicus adenylate cyclase activating polypeptide 1 (Adcyap1)_ mRNA [NM_016989]                                                                                 | -0.26 | 0.00309 |
| A_44_P628465  | BF544609     | UI-R-BT0-qh-h-11-0-UI.r1 UI-R-BT0 Rattus norvegicus cDNA clone UI-R-BT0-qh-h-11-0-UI 5'_ mRNA sequence [BF544609]                                                        | -0.26 | 0.00269 |
| A_44_P1004886 | MGC72614     | Rattus norvegicus Unknown (protein for MGC:72614) (MGC72614)_ mRNA [NM_199105]                                                                                           | -0.26 | 0.00225 |
| A_44_P655666  | TC567231     | Unknown                                                                                                                                                                  | -0.26 | 0.00194 |
| A_44_P639923  | TC564397     | Unknown                                                                                                                                                                  | -0.26 | 0.00182 |
| A_44_P581843  | CO401680     | AGENCOURT_27827034 NIH_MGC_252 Rattus norvegicus cDNA clone IMAGE:7310821 5'_ mRNA sequence [CO401680]                                                                   | -0.26 | 0.00182 |
| A_42_P723641  | POPDC2       | Rattus norvegicus popeye domain containing 2 (Popdc2)_ mRNA [NM_199113]                                                                                                  | -0.26 | 0.00150 |
| A_44_P233557  | RSB-11-77    | Rattus norvegicus RSB-11-77 protein (RSB-11-77)_ mRNA [NM_182669]                                                                                                        | -0.26 | 0.00147 |
| A_44_P748166  | XM_575616    | PREDICTED: Rattus norvegicus similar to TAF1 protein (LOC500266)_ mRNA [XM_575616]                                                                                       | -0.26 | 0.00143 |
| A_44_P1039394 | HRASLS       | PREDICTED: Rattus norvegicus HRAS-like suppressor (predicted) (Hrasls_predicted)_ mRNA [XM_213590]                                                                       | -0.26 | 0.00121 |
| A_44_P987655  | AW914041     | AW914041 EST294819 Rat gene index_ normalized rat_ norvegicus_ Bento Soares Rattus norvegicus cDNA clone RGIZB53 5' end_ mRNA sequence [AW914041]                        | -0.26 | 0.00086 |
| A_44_P541562  | RGD1564127   | PREDICTED: Rattus norvegicus similar to groucho protein GRG1-LDLZ2; Grg1-LDLZ2 (LOC367007)_ mRNA [XM_345891]                                                             | -0.26 | 0.00069 |
| A_42_P725471  | PTPN21       | Rattus norvegicus protein tyrosine phosphatase 2E (Ptpn21)_ mRNA [NM_133545]                                                                                             | -0.26 | 0.00067 |
| A_44_P133470  | LOC363393    | PREDICTED: Rattus norvegicus similar to GTPase activating protein testicular GAP1 (LOC363393)_ mRNA [XM_347133]                                                          | -0.26 | 0.00054 |
| A_44_P1036943 | AA900293     | AA900293 UI-R-E0-dd-b-05-0-UI.s1 UI-R-E0 Rattus norvegicus cDNA clone UI-R-E0-dd-b-05-0-UI 3' similar to gi [AA900293]                                                   | -0.26 | 0.00052 |
| A_43_P17230   | NM_001034918 | Rattus norvegicus similar to hypothetical protein FLJ10006 (RGD1304762)_ mRNA [NM_001034918]                                                                             | -0.26 | 0.00048 |
| A_44_P1057602 | AW915906     | AW915906 EST347210 Rat gene index_ normalized rat_ norvegicus_ Bento Soares Rattus norvegicus cDNA clone RGIDC33 5' end_ mRNA sequence [AW915906]                        | -0.26 | 0.00039 |
| A_44_P791696  | DV725758     | RVL17988 Wackym-Soares normalized rat vestibular cDNA library Rattus norvegicus cDNA 5'_ mRNA sequence [DV725758]                                                        | -0.26 | 0.00035 |
| A_44_P1050325 | RHEBL1       | Rattus norvegicus Ras homolog enriched in brain like 1 (Rheb1)_ mRNA [NM_182825]                                                                                         | -0.26 | 0.00026 |
| A_44_P828870  | TC557172     | Unknown                                                                                                                                                                  | -0.26 | 0.00023 |
| A_44_P199597  | CB544987     | CB544987 AMGNNUC:MRBE3-00114-H1-A rat brain E15 (10374) Rattus norvegicus cDNA clone mrbe3-00114-h1 5'_ mRNA sequence [CB544987]                                         | -0.26 | 0.00014 |
| A_44_P716856  | TC550588     | Q7PCP7 (Q7PCP7) GLP_414_18752_18162 (GLP_9_1212_622)_ partial (8%) [TC550588]                                                                                            | -0.26 | 0.00013 |
| A_44_P380332  | CYFIP2       | PREDICTED: Rattus norvegicus cytoplasmic FMR1 interacting protein 2 (predicted) (Cyfip2_predicted)_ mRNA [XM_220333]                                                     | -0.26 | 0.00010 |
| A_44_P199597  | CB544987     | CB544987 AMGNNUC:MRBE3-00114-H1-A rat brain E15 (10374) Rattus norvegicus cDNA clone mrbe3-00114-h1 5'_ mRNA sequence [CB544987]                                         | -0.26 | 0.00009 |
| A_44_P1002601 | BF549601     | BF549601 UI-R-C2-mv-e-05-0-UI.r1 UI-R-C2 Rattus norvegicus cDNA clone UI-R-C2-mv-e-05-0-UI 5'_ mRNA sequence [BF549601]                                                  | -0.26 | 0.00006 |
| A_44_P398399  | TM9SF2       | Rattus norvegicus transmembrane 9 superfamily member 2 (Tm9sf2)_ mRNA [NM_001005554]                                                                                     | -0.26 | 0.00005 |
| A_44_P300637  | ZFP131       | PREDICTED: Rattus norvegicus zinc finger protein 131 (predicted) (Zfp131_predicted)_ mRNA [XM_227104]                                                                    | -0.26 | 0.00003 |
| A_44_P205796  | CETN3        | PREDICTED: Rattus norvegicus centrin 3 (Cetn3)_ mRNA [XM_342168]                                                                                                         | -0.26 | 0.00001 |
| A_44_P470980  | NM_001014037 | Rattus norvegicus similar to 4833420G17Rik protein (RGD1306227)_ mRNA [NM_001014037]                                                                                     | -0.26 | 0.00001 |
| A_44_P544757  | AA801075     | AA801075 EST190572 Normalized rat ovary_ Bento Soares Rattus sp. cDNA clone ROVAA36 5' end_ mRNA sequence [AA801075]                                                     | -0.26 | 0.00000 |

|               |              |                                                                                                                                                                                                      |       |         |
|---------------|--------------|------------------------------------------------------------------------------------------------------------------------------------------------------------------------------------------------------|-------|---------|
| A_44_P54867   | AW917688     | AW917688 EST348992 Rat gene index_ normalized rat_ norvegicus_ Bento Soares Rattus norvegicus cDNA clone RGIEG83 5' end_ mRNA sequence [AW917688]                                                    | -0.26 | 0.00000 |
| A_44_P761267  | TC521072     | Unknown                                                                                                                                                                                              | -0.27 | 0.00475 |
| A_43_P15297   | SYNPR        | Rattus norvegicus synaptopodin (Synpr)_ mRNA [NM_023974]                                                                                                                                             | -0.27 | 0.00304 |
| A_43_P12965   | NLGN1        | Rattus norvegicus neuroligin 1 (Nlgn1)_ mRNA [NM_053868]                                                                                                                                             | -0.27 | 0.00202 |
| A_44_P424441  | LOC363405    | PREDICTED: Rattus norvegicus similar to nidogen 2 protein (LOC363405)_ mRNA [XM_347136]                                                                                                              | -0.27 | 0.00190 |
| A_42_P555426  | DV714275     | RVL3549 Wackym-Soares normalized rat vestibular cDNA library Rattus norvegicus cDNA 5'_ mRNA sequence [DV714275]                                                                                     | -0.27 | 0.00165 |
| A_44_P605482  | AY671904     | Rattus norvegicus clone 30A-bis-RBSC mRNA sequence. [AY671904]                                                                                                                                       | -0.27 | 0.00108 |
| A_44_P336878  | BF289560     | BF289560 EST454151 Rat Gene Index_ normalized rat_ Rattus norvegicus cDNA Rattus norvegicus cDNA clone RGIHI50_ mRNA sequence [BF289560]                                                             | -0.27 | 0.00090 |
| A_44_P947069  | TC545323     | Unknown                                                                                                                                                                                              | -0.27 | 0.00084 |
| A_44_P716774  | BC092620     | Rattus norvegicus cDNA clone IMAGE:7313056 [BC092620]                                                                                                                                                | -0.27 | 0.00064 |
| A_44_P392845  | COL5A2       | Rattus norvegicus collagen_type V_ alpha 2 (Col5a2)_ mRNA [XM_343564]                                                                                                                                | -0.27 | 0.00063 |
| A_44_P820225  | XM_574760    | PREDICTED: Rattus norvegicus similar to minichromosome maintenance protein 8 isoform 1 (LOC499437)_ mRNA [XM_574760]                                                                                 | -0.27 | 0.00059 |
| A_44_P1050444 | ATP5S        | Rattus norvegicus mitochondrial ATP synthase regulatory component factor B (Atp5s)_ mRNA [NM_001007749]                                                                                              | -0.27 | 0.00041 |
| A_44_P654028  | TC524770     | Unknown                                                                                                                                                                                              | -0.27 | 0.00027 |
| A_43_P17936   | TC558785     | Q75BU0 (Q75BU0) ACR181Cp_ partial (5%) [TC558785]                                                                                                                                                    | -0.27 | 0.00025 |
| A_44_P270307  | BF403864     | BF403864 UI-R-CA1-bix-n-01-0-UI.s1 UI-R-CA1 Rattus norvegicus cDNA clone UI-R-CA1-bix-n-01-0-UI 3'_ mRNA sequence [BF403864]                                                                         | -0.27 | 0.00024 |
| A_44_P839072  | TC542724     | Unknown                                                                                                                                                                                              | -0.27 | 0.00013 |
| A_44_P199597  | CB544987     | CB544987 AMGNNUC:MRBE3-00114-H1-A rat brain E15 (10374) Rattus norvegicus cDNA clone mrbe3-00114-h1 5'_ mRNA sequence [CB544987]                                                                     | -0.27 | 0.00012 |
| A_44_P715151  | TC520950     | TAF6_RAT (Q63801) Transcription initiation factor TFIID subunit 6 (Transcription initiation factor TFIID 70 kDa subunit) (TAF(II)70) (TAFII-70) (TAFII-80) (TAFII80) (p80)_ partial (28%) [TC520950] | -0.27 | 0.00007 |
| A_44_P995051  | SSX2IP       | Rattus norvegicus synovial sarcoma_ X breakpoint 2 interacting protein (Ssx2ip)_ mRNA [NM_175597]                                                                                                    | -0.27 | 0.00006 |
| A_44_P824102  | TC526114     | Unknown                                                                                                                                                                                              | -0.27 | 0.00006 |
| A_44_P323073  | AW917635     | AW917635 EST348939 Rat gene index_ normalized rat_ norvegicus_ Bento Soares Rattus norvegicus cDNA clone RGIEG27 5' end_ mRNA sequence [AW917635]                                                    | -0.27 | 0.00005 |
| A_42_P512252  | WIT3.0       | Rattus norvegicus wound inducible transcript 3.0 (Wit3.0)_ mRNA [NM_201421]                                                                                                                          | -0.27 | 0.00005 |
| A_44_P199597  | CB544987     | CB544987 AMGNNUC:MRBE3-00114-H1-A rat brain E15 (10374) Rattus norvegicus cDNA clone mrbe3-00114-h1 5'_ mRNA sequence [CB544987]                                                                     | -0.27 | 0.00004 |
| A_44_P303430  | AW142654     | AW142654 EST292906 Normalized rat embryo_ Bento Soares Rattus sp. cDNA clone RGIAR57 5' end_ mRNA sequence [AW142654]                                                                                | -0.27 | 0.00003 |
| A_44_P592207  | TC537000     | Unknown                                                                                                                                                                                              | -0.27 | 0.00000 |
| A_44_P728469  | PTER         | Rattus norvegicus phosphotriesterase related (Pter)_ mRNA [NM_022224]                                                                                                                                | -0.28 | 0.00477 |
| A_44_P1017996 | LOC361188    | PREDICTED: Rattus norvegicus similar to WD repeat domain 17 (LOC361188)_ mRNA [XM_341470]                                                                                                            | -0.28 | 0.00440 |
| A_44_P837824  | TC520566     | Unknown                                                                                                                                                                                              | -0.28 | 0.00385 |
| A_44_P777899  | CX570069     | RVL1182 Wackym-Soares normalized rat vestibular cDNA library Rattus norvegicus cDNA 5'_ mRNA sequence [CX570069]                                                                                     | -0.28 | 0.00356 |
| A_44_P898943  | TC552287     | PARA_RAT (Q9HB97) Alpha-parvin (Actopaxin)_ complete [TC552287]                                                                                                                                      | -0.28 | 0.00307 |
| A_44_P256534  | AW918699     | AW918699 EST350003 Rat gene index_ normalized rat_ norvegicus_ Bento Soares Rattus norvegicus cDNA clone RGIEW70 5' end_ mRNA sequence [AW918699]                                                    | -0.28 | 0.00298 |
| A_42_P521814  | TC540350     | S15A_RAT (O54923) Exocyst complex component Sec15A (rSec15)_ partial (10%) [TC540350]                                                                                                                | -0.28 | 0.00295 |
| A_44_P505634  | AW142807     | AW142807 EST293061 Normalized rat brain_ Bento Soares Rattus sp. cDNA clone RGIAW15 5' end_ mRNA sequence [AW142807]                                                                                 | -0.28 | 0.00267 |
| A_44_P579147  | DV720344     | RVL11340 Wackym-Soares normalized rat vestibular cDNA library Rattus norvegicus cDNA 5'_ mRNA sequence [DV720344]                                                                                    | -0.28 | 0.00266 |
| A_44_P886652  | TC532501     | Q6YUI4 (Q6YUI4) Auxin-induced protein-like_ partial (6%) [TC532501]                                                                                                                                  | -0.28 | 0.00237 |
| A_44_P778450  | XM_576964    | PREDICTED: Rattus norvegicus similar to chromosome X open reading frame 23 (LOC501559)_ mRNA [XM_576964]                                                                                             | -0.28 | 0.00224 |
| A_43_P10102   | AW914942     | EST346246 Normalized rat ovary_ Bento Soares Rattus sp. cDNA clone RGIBM61 5' end_ mRNA sequence [AW914942]                                                                                          | -0.28 | 0.00204 |
| A_42_P741034  | RGD1566282   | PREDICTED: Rattus norvegicus similar to RIKEN cDNA D330045A20 (LOC315911)_ mRNA [XM_236533]                                                                                                          | -0.28 | 0.00195 |
| A_43_P23274   | NM_001025288 | Rattus norvegicus similar to RIKEN cDNA 4921520P21 (MGC114388)_ mRNA [NM_001025288]                                                                                                                  | -0.28 | 0.00183 |
| A_44_P638253  | TC557432     | Unknown                                                                                                                                                                                              | -0.28 | 0.00098 |
| A_42_P600870  | XM_575775    | PREDICTED: Rattus norvegicus similar to hypothetical protein (LOC500413)_ mRNA [XM_575775]                                                                                                           | -0.28 | 0.00089 |
| A_44_P715676  | TC542574     | Unknown                                                                                                                                                                                              | -0.28 | 0.00070 |

|               |                |                                                                                                                                                   |       |         |
|---------------|----------------|---------------------------------------------------------------------------------------------------------------------------------------------------|-------|---------|
| A_43_P10668   | TC523402       | Unknown                                                                                                                                           | -0.28 | 0.00054 |
| A_44_P795878  | TC547717       | Unknown                                                                                                                                           | -0.28 | 0.00053 |
| A_44_P897591  | AA957047       | AA957047 UI-R-E1-ge-a-08-0-UI.s1 UI-R-E1 Rattus norvegicus cDNA clone UI-R-E1-ge-a-08-0-UI 3' mRNA sequence [AA957047]                            | -0.28 | 0.00052 |
| A_42_P743580  | RGS4           | Rattus norvegicus regulator of G-protein signaling 4 (Rgs4)_ mRNA [NM_017214]                                                                     | -0.28 | 0.00043 |
| A_43_P10201   | BG665180       | BG665180 DRABZE10 Rat DRG Library Rattus norvegicus cDNA clone DRABZE10 5' mRNA sequence [BG665180]                                               | -0.28 | 0.00039 |
| A_44_P223003  | BF567171       | BF567171 UI-R-BO0-ahq-h-04-0-UI.r1 UI-R-BO0 Rattus norvegicus cDNA clone UI-R-BO0-ahq-h-04-0-UI 5' mRNA sequence [BF567171]                       | -0.28 | 0.00022 |
| A_44_P497672  | BQ782805       | BQ782805 UI-R-FF0-cpl-i-20-0-UI.s1 NCI_CGAP_FF0 Rattus norvegicus cDNA clone UI-R-FF0-cpl-i-20-0-UI 3' mRNA sequence [BQ782805]                   | -0.28 | 0.00013 |
| A_43_P16968   | RGD1562008     | Rattus norvegicus similar to mKIAA0708 protein (LOC316228)_ mRNA [XM_236927]                                                                      | -0.28 | 0.00009 |
| A_44_P885072  | TC559412       | Unknown                                                                                                                                           | -0.28 | 0.00008 |
| A_44_P794536  | TC528250       | Q7TPJ2 (Q7TPJ2) Ac2-224_ partial (18%) [TC528250]                                                                                                 | -0.28 | 0.00007 |
| A_44_P234657  | AI102873       | AI102873 EST212162 Normalized rat embryo_Bento Soares Rattus sp. cDNA clone REMBT96 3' end_ mRNA sequence [AI102873]                              | -0.28 | 0.00005 |
| A_44_P961703  | DV721166       | RVL12303 Wackym-Soares normalized rat vestibular cDNA library Rattus norvegicus cDNA 5' mRNA sequence [DV721166]                                  | -0.28 | 0.00005 |
| A_44_P416127  | AI008939       | AI008939 EST203390 Normalized rat embryo_Bento Soares Rattus sp. cDNA clone REMBF75 3' end_ mRNA sequence [AI008939]                              | -0.28 | 0.00002 |
| A_44_P1034640 | TC518736       | BC002833 cancer/testis antigen 2_ isoform b {Homo sapiens;}_ partial (11%) [TC518736]                                                             | -0.28 | 0.00002 |
| A_42_P543694  | PORF-2         | Rat mRNA for preoptic regulatory factor-2 (PORF-2). [X53232]                                                                                      | -0.28 | 0.00001 |
| A_44_P1036875 | RGD1309634     | PREDICTED: Rattus norvegicus hypothetical LOC305452 (predicted) (LOC305452)_ mRNA [XM_223536]                                                     | -0.28 | 0.00000 |
| A_44_P449978  | LOC292722      | Rattus norvegicus similar to hypothetical protein FLJ90805 (LOC292722)_ mRNA [XM_218338]                                                          | -0.29 | 0.00410 |
| A_44_P540279  | AW144704       | AW144704 EST290456 Normalized rat ovary_Bento Soares Rattus sp. cDNA clone RGIAI70 5' end similar to topoisomerase I_ mRNA sequence [AW144704]    | -0.29 | 0.00337 |
| A_42_P818546  | ENSRNOT0000002 | Q6P9Q4 (Q6P9Q4) Formin homology 2 domain containing 1_ partial (6%) [TC567129]                                                                    | -0.29 | 0.00323 |
| A_44_P315886  | MAGI3          | Rattus norvegicus membrane-associated guanylate kinase-related (MAGI-3) (Magi3)_ mRNA [NM_139084]                                                 | -0.29 | 0.00283 |
| A_44_P501390  | XM_573622      | PREDICTED: Rattus norvegicus similar to RIKEN cDNA 5730509K17 gene (LOC498386)_ mRNA [XM_573622]                                                  | -0.29 | 0.00254 |
| A_44_P750250  | TC566921       | Unknown                                                                                                                                           | -0.29 | 0.00221 |
| A_44_P1004392 | LOC288109      | Rattus norvegicus similar to hypothetical protein FLJ20174 (LOC288109)_ mRNA [XM_221455]                                                          | -0.29 | 0.00199 |
| A_42_P619996  | SF3B1          | PREDICTED: Rattus norvegicus splicing factor 3b_ subunit 1 (Sf3b1)_ mRNA [XM_343570]                                                              | -0.29 | 0.00087 |
| A_43_P14919   | PPM2C          | Rattus norvegicus protein phosphatase 2C_ magnesium dependent_ catalytic subunit (Ppm2c)_ mRNA [NM_019372]                                        | -0.29 | 0.00080 |
| A_44_P653818  | TC523183       | Unknown                                                                                                                                           | -0.29 | 0.00064 |
| A_43_P10275   | AW915934       | AW915934 EST347238 Rat gene index_ normalized rat_ norvegicus_ Bento Soares Rattus norvegicus cDNA clone RGIDC81 5' end_ mRNA sequence [AW915934] | -0.29 | 0.00053 |
| A_44_P792577  | CO394488       | AGENCOURT_26754808 NIH_MGC_255 Rattus norvegicus cDNA clone IMAGE:7321167 5' mRNA sequence [CO394488]                                             | -0.29 | 0.00045 |
| A_44_P592800  | TC559647       | Q6SQ23 (Q6SQ23) Maturase (Fragment)_ partial (5%) [TC559647]                                                                                      | -0.29 | 0.00041 |
| A_44_P117380  | BF559538       | BF559538 UI-R-A1-dx-d-02-0-UI.r1 UI-R-A1 Rattus norvegicus cDNA clone UI-R-A1-dx-d-02-0-UI 5' mRNA sequence [BF559538]                            | -0.29 | 0.00031 |
| A_44_P917150  | DV728005       | RVL20600 Wackym-Soares normalized rat vestibular cDNA library Rattus norvegicus cDNA 5' mRNA sequence [DV728005]                                  | -0.29 | 0.00025 |
| A_42_P602570  | NM_001037365   | Rattus norvegicus brain expressed X-linked 1 (Bex1)_ mRNA [NM_001037365]                                                                          | -0.29 | 0.00023 |
| A_44_P593368  | BG673595       | DRN1F05 Rat DRG Library Rattus norvegicus cDNA clone DRN1F05 5' mRNA sequence [BG673595]                                                          | -0.29 | 0.00022 |
| A_44_P528685  | AW915063       | AW915063 EST346367 Normalized rat ovary_Bento Soares Rattus sp. cDNA clone RGIBO54 5' end_ mRNA sequence [AW915063]                               | -0.29 | 0.00011 |
| A_44_P891704  | CK476494       | AGENCOURT_17581926 NIH_MGC_232 Rattus norvegicus cDNA clone IMAGE:7125239 5' mRNA sequence [CK476494]                                             | -0.29 | 0.00008 |
| A_44_P915194  | TC557698       | HSA556684 immunoglobulin gamma heavy chain variable region {Homo sapiens;}_ partial (16%) [TC557698]                                              | -0.29 | 0.00007 |
| A_44_P199597  | CB544987       | CB544987 AMGNNUC:MRBE3-00114-H1-A rat brain E15 (10374) Rattus norvegicus cDNA clone mrbe3-00114-h1 5' mRNA sequence [CB544987]                   | -0.29 | 0.00003 |
| A_44_P960935  | TC556981       | Unknown                                                                                                                                           | -0.29 | 0.00002 |
| A_42_P800669  | BF289687       | BF289687 EST454278 Rat Gene Index_ normalized rat_ Rattus norvegicus cDNA Rattus norvegicus cDNA clone RGIHJ84_ mRNA sequence [BF289687]          | -0.29 | 0.00001 |
| A_44_P776231  | TP53I11        | PREDICTED: Rattus norvegicus tumor protein p53 inducible protein 11 (predicted) (Tp53i11_predicted)_ mRNA [XM_230296]                             | -0.3  | 0.00375 |
| A_44_P640931  | TC543001       | Unknown                                                                                                                                           | -0.3  | 0.00325 |
| A_44_P855281  | TC564012       | Unknown                                                                                                                                           | -0.3  | 0.00324 |
| A_44_P715030  | TC539553       | Unknown                                                                                                                                           | -0.3  | 0.00160 |

|               |              |                                                                                                                                                        |       |         |
|---------------|--------------|--------------------------------------------------------------------------------------------------------------------------------------------------------|-------|---------|
| A_44_P639191  | TC525457     | Unknown                                                                                                                                                | -0.3  | 0.00092 |
| A_44_P852945  | TC553952     | R31B_PSEAE (Q9HY25) 50S ribosomal protein L31 type B_partial (24%) [TC553952]                                                                          | -0.3  | 0.00083 |
| A_44_P983155  | LOC304237    | PREDICTED: Rattus norvegicus similar to GTPase activating protein testicular GAP1 (LOC304237)_mRNA [XM_239589]                                         | -0.3  | 0.00050 |
| A_42_P455531  | CHRM3        | Rattus norvegicus cholinergic receptor_muscarinic 3 (Chrm3)_mRNA [NM_012527]                                                                           | -0.3  | 0.00049 |
| A_44_P978840  | DV720702     | RVL11758 Wackym-Soares normalized rat vestibular cDNA library Rattus norvegicus cDNA 5'_mRNA sequence [DV720702]                                       | -0.3  | 0.00028 |
| A_44_P653849  | TC524169     | Unknown                                                                                                                                                | -0.3  | 0.00023 |
| A_44_P438158  | LPHN3        | Rattus norvegicus calcium-independent alpha-latrotoxin receptor homolog 3 (Lphn3)_mRNA [NM_130822]                                                     | -0.3  | 0.00019 |
| A_43_P15659   | GSTO1        | Rattus norvegicus glutathione S-transferase omega 1 (Gsto1)_mRNA [XM_342062]                                                                           | -0.3  | 0.00011 |
| A_44_P715059  | TC539683     | Unknown                                                                                                                                                | -0.3  | 0.00007 |
| A_43_P11594   | NPY5R        | Rattus norvegicus neuropeptide Y receptor Y5 (Npy5r)_mRNA [NM_012869]                                                                                  | -0.3  | 0.00007 |
| A_44_P779316  | TC551515     | Unknown                                                                                                                                                | -0.3  | 0.00006 |
| A_44_P199597  | CB544987     | CB544987 AMGNNUC:MRBE3-00114-H1-A rat brain E15 (10374) Rattus norvegicus cDNA clone mrbe3-00114-h1 5'_mRNA sequence [CB544987]                        | -0.3  | 0.00005 |
| A_42_P488076  | AW142579     | AW142579 EST292831 Normalized rat embryo_Bento Soares Rattus sp. cDNA clone RGIAQ04 5'_end_mRNA sequence [AW142579]                                    | -0.3  | 0.00003 |
| A_44_P684073  | TC538910     | Unknown                                                                                                                                                | -0.3  | 0.00002 |
| A_44_P652658  | TC535554     | Q8IRQ4 (Q8IRQ4) CG32741-PA_partial (6%) [TC535554]                                                                                                     | -0.3  | 0.00002 |
| A_44_P199597  | CB544987     | CB544987 AMGNNUC:MRBE3-00114-H1-A rat brain E15 (10374) Rattus norvegicus cDNA clone mrbe3-00114-h1 5'_mRNA sequence [CB544987]                        | -0.3  | 0.00002 |
| A_44_P779894  | TC535460     | Unknown                                                                                                                                                | -0.3  | 0.00001 |
| A_44_P981062  | A_44_P981062 | Unknown                                                                                                                                                | -0.3  | 0.00001 |
| A_42_P593993  | LIMK2        | Rattus norvegicus LIM motif-containing protein kinase 2 (Limk2)_mRNA [NM_024135]                                                                       | -0.3  | 0.00000 |
| A_44_P853966  | TC541745     | Q8R4C3 (Q8R4C3) Csr1_partial (37%) [TC541745]                                                                                                          | -0.3  | 0.00000 |
| A_44_P522701  | ADCYAP1      | Rattus norvegicus adenylate cyclase activating polypeptide 1 (Adcyap1)_mRNA [NM_016989]                                                                | -0.3  | 0.00000 |
| A_42_P501233  | ADRA1D       | Rattus norvegicus adrenergic receptor_alpha 1d (Adra1d)_mRNA [NM_024483]                                                                               | -0.31 | 0.00389 |
| A_44_P297337  | RGD1566069   | PREDICTED: Rattus norvegicus similar to GTPase activating protein testicular GAP1 (LOC361469)_mRNA [XM_346976]                                         | -0.31 | 0.00276 |
| A_44_P778162  | CX569250     | RVL178 Wackym-Soares normalized rat vestibular cDNA library Rattus norvegicus cDNA 5'_mRNA sequence [CX569250]                                         | -0.31 | 0.00214 |
| A_44_P1031380 | MYH1         | PREDICTED: Rattus norvegicus type 2X myosin heavy chain (Myh1)_mRNA [XM_213345]                                                                        | -0.31 | 0.00136 |
| A_42_P594475  | AI136136     | AI136136 UI-R-C2p-ny-e-08-0-UI.s1 UI-R-C2p Rattus norvegicus cDNA clone UI-R-C2p-ny-e-08-0-UI 3'_mRNA sequence [AI136136]                              | -0.31 | 0.00084 |
| A_44_P389493  | RGD1562491   | Rattus norvegicus similar to Ac1262 (LOC363416)_mRNA [XM_343740]                                                                                       | -0.31 | 0.00067 |
| A_42_P715712  | BI395758     | BI395758 EST531629 Rat gene index_normalized rat_norvegicus Rattus norvegicus cDNA clone RGICN02 5'_end_mRNA sequence [BI395758]                       | -0.31 | 0.00055 |
| A_44_P247644  | AW917724     | AW917724 EST349028 Rat gene index_normalized rat_norvegicus_Bento Soares Rattus norvegicus cDNA clone RGIEH26 5'_end_mRNA sequence [AW917724]          | -0.31 | 0.00042 |
| A_44_P353850  | TIAM2        | PREDICTED: Rattus norvegicus T-cell lymphoma invasion and metastasis 2 (predicted) (Tiam2_predicted)_mRNA [XM_217851]                                  | -0.31 | 0.00016 |
| A_44_P589944  | AI170356     | AI170356 EST216282 Normalized rat lung_Bento Soares Rattus sp. cDNA clone RLUCH31 3'_end_mRNA sequence [AI170356]                                      | -0.31 | 0.00011 |
| A_44_P863359  | RGD1562632   | PREDICTED: Rattus norvegicus similar to leucine-rich repeats and calponin homology (CH) domain containing 2 (LOC367754)_mRNA [XM_346281]               | -0.31 | 0.00009 |
| A_44_P1042504 | BC099190     | Rattus norvegicus similar to RNA (guanine-9-) methyltransferase domain containing 2_mRNA (cDNA clone MGC:116361 IMAGE:7383412)_complete cds [BC099190] | -0.31 | 0.00008 |
| A_44_P1048140 | AI072036     | AI072036 UI-R-C2-nd-g-01-0-UI.s1 UI-R-C2 Rattus norvegicus cDNA clone UI-R-C2-nd-g-01-0-UI 3'_mRNA sequence [AI072036]                                 | -0.31 | 0.00007 |
| A_43_P18644   | TC543339     | Unknown                                                                                                                                                | -0.31 | 0.00001 |
| A_44_P282826  | BF558098     | BF558098 UI-R-C0-hk-f-10-0-UI.r1 UI-R-C0 Rattus norvegicus cDNA clone UI-R-C0-hk-f-10-0-UI 5'_mRNA sequence [BF558098]                                 | -0.31 | 0.00001 |
| A_44_P670703  | TC529841     | Q69566 (Q69566) U88_partial (5%) [TC529841]                                                                                                            | -0.31 | 0.00001 |
| A_44_P199597  | CB544987     | CB544987 AMGNNUC:MRBE3-00114-H1-A rat brain E15 (10374) Rattus norvegicus cDNA clone mrbe3-00114-h1 5'_mRNA sequence [CB544987]                        | -0.31 | 0.00000 |
| A_44_P926632  | AI045167     | AI045167 UI-R-C1-kk-e-08-0-UI.s1 UI-R-C1 Rattus norvegicus cDNA clone UI-R-C1-kk-e-08-0-UI 3'_mRNA sequence [AI045167]                                 | -0.31 | 0.00000 |
| A_44_P1011464 | AA799294     | AA799294 EST188791 Normalized rat heart_Bento Soares Rattus sp. cDNA clone RHEAA15 5'_end_mRNA sequence [AA799294]                                     | -0.32 | 0.00250 |
| A_44_P608543  | DV728183     | RVL20793 Wackym-Soares normalized rat vestibular cDNA library Rattus norvegicus cDNA 5'_mRNA sequence [DV728183]                                       | -0.32 | 0.00144 |
| A_43_P19941   | NM_001013857 | Rattus norvegicus similar to RIKEN cDNA 4930449E07 (RGD1309150)_mRNA [NM_001013857]                                                                    | -0.32 | 0.00110 |
| A_44_P976842  | DV718343     | RVL8950 Wackym-Soares normalized rat vestibular cDNA library Rattus norvegicus cDNA 5'_mRNA sequence [DV718343]                                        | -0.32 | 0.00070 |



|               |              |                                                                                                                                                                        |       |         |
|---------------|--------------|------------------------------------------------------------------------------------------------------------------------------------------------------------------------|-------|---------|
| A_44_P726736  | AI136297     | AI136297 UI-R-C2p-aa-d-10-0-UI.s1 UI-R-C2p Rattus norvegicus cDNA clone UI-R-C2p-aa-d-10-0-UI 3'_ mRNA sequence [AI136297]                                             | -0.32 | 0.00065 |
| A_44_P517317  | BC081885     | Rattus norvegicus cDNA clone MGC:93760 IMAGE:7108525_ complete cds [BC081885]                                                                                          | -0.32 | 0.00065 |
| A_44_P976296  | TC541495     | Unknown                                                                                                                                                                | -0.32 | 0.00060 |
| A_42_P513859  | BF550844     | BF550844 UI-R-C1-jw-h-10-0-UI.r1 UI-R-C1 Rattus norvegicus cDNA clone UI-R-C1-jw-h-10-0-UI 5'_ mRNA sequence [BF550844]                                                | -0.32 | 0.00058 |
| A_44_P684397  | CO398039     | AGENCOURT_26745729 NIH_MGC_254 Rattus norvegicus cDNA clone IMAGE:7316288 5'_ mRNA sequence [CO398039]                                                                 | -0.32 | 0.00031 |
| A_44_P640057  | TC565530     | Unknown                                                                                                                                                                | -0.32 | 0.00025 |
| A_44_P697233  | AW141305     | AW141305 EST291346 Normalized rat brain_Bento Soares Rattus sp. cDNA clone RGIBL08 5' end similar to inositol polyphosphate 5-phosphatase II_ mRNA sequence [AW141305] | -0.32 | 0.00023 |
| A_44_P777884  | TC524832     | CMGD_BACSU (P25956) ComG operon protein 4 precursor_ partial (11%) [TC524832]                                                                                          | -0.32 | 0.00017 |
| A_44_P932384  | TC545241     | Unknown                                                                                                                                                                | -0.32 | 0.00016 |
| A_44_P388755  | KNSL7        | Rattus norvegicus kinesin-like 7 (Kns17)_ mRNA [NM_181635]                                                                                                             | -0.32 | 0.00009 |
| A_44_P178576  | CNKS2        | Rattus norvegicus membrane-associated guanylate kinase-interacting protein (Cnks2)_ mRNA [NM_021686]                                                                   | -0.32 | 0.00003 |
| A_44_P285694  | BFSP1        | PREDICTED: Rattus norvegicus beaded filament structural protein 1 (Bfsp1)_ mRNA [XM_342529]                                                                            | -0.32 | 0.00000 |
| A_44_P577351  | TC558986     | Unknown                                                                                                                                                                | -0.32 | 0.00000 |
| A_44_P542995  | RNF25        | Rattus norvegicus ring finger protein 25 (Rnf25)_ mRNA [NM_001012004]                                                                                                  | -0.33 | 0.00438 |
| A_44_P164848  | AW142951     | AW142951 EST293243 Normalized rat ovary_Bento Soares Rattus sp. cDNA clone RGIBA19 5' end_ mRNA sequence [AW142951]                                                    | -0.33 | 0.00228 |
| A_43_P12227   | CRIP2        | Rattus norvegicus cysteine-rich protein 2 (Crip2)_ mRNA [NM_022501]                                                                                                    | -0.33 | 0.00169 |
| A_44_P328930  | BF555161     | BF555161 UI-R-E0-cs-e-04-0-UI.r1 UI-R-E0 Rattus norvegicus cDNA clone UI-R-E0-cs-e-04-0-UI 5'_ mRNA sequence [BF555161]                                                | -0.33 | 0.00061 |
| A_44_P639429  | TC527459     | Unknown                                                                                                                                                                | -0.33 | 0.00027 |
| A_44_P476810  | BF286190     | BF286190 EST450781 Rat Gene Index_ normalized rat_ Rattus norvegicus cDNA Rattus norvegicus cDNA clone RGIFN19 5' sequence_ mRNA sequence [BF286190]                   | -0.33 | 0.00024 |
| A_44_P890340  | A_44_P890340 | Unknown                                                                                                                                                                | -0.33 | 0.00024 |
| A_44_P978012  | TC526598     | Unknown                                                                                                                                                                | -0.33 | 0.00022 |
| A_44_P886424  | TX548010     | ATPF_MYCPN (Q50327) ATP synthase B chain precursor _ partial (9%) [TC548010]                                                                                           | -0.33 | 0.00012 |
| A_43_P14581   | CX570449     | RVL1602 Wackym-Soares normalized rat vestibular cDNA library Rattus norvegicus cDNA 5'_ mRNA sequence [CX570449]                                                       | -0.33 | 0.00008 |
| A_44_P408679  | SSX2IP       | Rattus norvegicus synovial sarcoma_X breakpoint 2 interacting protein (Ssx2ip)_ mRNA [NM_175597]                                                                       | -0.33 | 0.00007 |
| A_44_P854908  | CB583330     | AMGNNUC:NRHY5-00351-C1-A W Rat hypothalamus (10471) Rattus norvegicus cDNA clone nrhy5-00351-c1 5'_ mRNA sequence [CB583330]                                           | -0.33 | 0.00003 |
| A_44_P376074  | BF567841     | BF567841 UI-R-BO0-ahn-c-11-0-UI.r1 UI-R-BO0 Rattus norvegicus cDNA clone UI-R-BO0-ahn-c-11-0-UI 5'_ mRNA sequence [BF567841]                                           | -0.33 | 0.00003 |
| A_44_P950713  | TC525833     | Unknown                                                                                                                                                                | -0.33 | 0.00000 |
| A_44_P634618  | AW143298     | AW143298 EST293594 Normalized rat brain_Bento Soares Rattus sp. cDNA clone RGIBJ90 5' end_ mRNA sequence [AW143298]                                                    | -0.34 | 0.00305 |
| A_42_P779282  | SCN3B        | Rattus norvegicus sodium channel_ voltage-gated_ type III_ beta (Scn3b)_ mRNA [NM_139097]                                                                              | -0.34 | 0.00299 |
| A_44_P684162  | TC555852     | Unknown                                                                                                                                                                | -0.34 | 0.00270 |
| A_44_P158107  | ARGBP2       | Rattus norvegicus Arg/Abl-interacting protein ArgBP2 (Argbp2)_ mRNA [NM_053770]                                                                                        | -0.34 | 0.00206 |
| A_44_P901848  | TC549506     | Unknown                                                                                                                                                                | -0.34 | 0.00095 |
| A_44_P448717  | PROM1        | Rattus norvegicus prominin 1 (Prom1)_ mRNA [NM_021751]                                                                                                                 | -0.34 | 0.00061 |
| A_44_P1018098 | MOGAT1       | PREDICTED: Rattus norvegicus monoacylglycerol O-acyltransferase 1 (predicted) (Mogat1_predicted)_ mRNA [XM_343602]                                                     | -0.34 | 0.00049 |
| A_44_P285423  | AW919005     | AW919005 EST350309 Rat gene index_ normalized rat_ norvegicus_ Bento Soares Rattus norvegicus cDNA clone RGIFB50 5' end_ mRNA sequence [AW919005]                      | -0.34 | 0.00011 |
| A_44_P1057585 | HTATIP2      | PREDICTED: Rattus norvegicus HIV-1 Tat interactive protein 2 (predicted) (Htatip2_predicted)_ mRNA [XM_214927]                                                         | -0.34 | 0.00002 |
| A_42_P732189  | RPL15        | Rattus norvegicus ribosomal protein L15 (Rpl15)_ mRNA [NM_139114]                                                                                                      | -0.34 | 0.00001 |
| A_44_P670015  | TC544250     | Unknown                                                                                                                                                                | -0.34 | 0.00001 |
| A_44_P946532  | TC543645     | Unknown                                                                                                                                                                | -0.34 | 0.00001 |
| A_44_P684874  | MTTP         | PREDICTED: Rattus norvegicus microsomal triglyceride transfer protein (predicted) (Mttp_predicted)_ mRNA [XM_227765]                                                   | -0.34 | 0.00000 |
| A_44_P716332  | TC561946     | Unknown                                                                                                                                                                | -0.34 | 0.00000 |
| A_42_P636761  | GZMM         | Rattus norvegicus serine protease mRNA_ complete cds. [L05175]                                                                                                         | -0.35 | 0.00418 |
| A_44_P168720  | RGD1566298   | PREDICTED: Rattus norvegicus similar to ankyrin repeat and SOCS box-containing protein 11 (LOC302666)_ mRNA [XM_217616]                                                | -0.35 | 0.00119 |

|               |              |                                                                                                                                                                    |       |         |
|---------------|--------------|--------------------------------------------------------------------------------------------------------------------------------------------------------------------|-------|---------|
| A_44_P640239  | TC531760     | Q8HL99 (Q8HL99) Cytochrome c oxidase subunit III_partial (5%) [TC531760]                                                                                           | -0.35 | 0.00087 |
| A_44_P1013330 | LOC363153    | PREDICTED: Rattus norvegicus similar to Arpp21 protein (LOC363153)_mRNA [XM_343492]                                                                                | -0.35 | 0.00083 |
| A_44_P628484  | TC551486     | Unknown                                                                                                                                                            | -0.35 | 0.00052 |
| A_44_P991472  | RNF39        | Rattus norvegicus ring finger protein 39 (Rnf39)_mRNA [NM_134374]                                                                                                  | -0.35 | 0.00023 |
| A_43_P15261   | NR3C2        | Rattus norvegicus nuclear receptor subfamily 3_group C_member 2 (Nr3c2)_mRNA [NM_013131]                                                                           | -0.35 | 0.00001 |
| A_44_P190838  | XM_574926    | PREDICTED: Rattus norvegicus similar to 6030410K14Rik protein (LOC499600)_mRNA [XM_574926]                                                                         | -0.35 | 0.00000 |
| A_44_P443636  | AC079436     | Rattus norvegicus chromosome 4 clone RP31-108L19 strain Brown Norway_complete sequence [AC079436]                                                                  | -0.36 | 0.00134 |
| A_42_P550344  | TLE3         | Rattus norvegicus transducin-like enhancer of split 3_E(spl) homolog (Drosophila) (Tle3)_mRNA [NM_053400]                                                          | -0.36 | 0.00069 |
| A_43_P14410   | TC522491     | Q46702 (Q46702) TraN protein_partial (38%) [TC522491]                                                                                                              | -0.36 | 0.00012 |
| A_44_P1008398 | STXBP6       | Rattus norvegicus similar to amisyn (LOC362734)_mRNA [XM_343057]                                                                                                   | -0.36 | 0.00007 |
| A_44_P701913  | TC545016     | Q7TQ12 (Q7TQ12) Aa1114_partial (9%) [TC545016]                                                                                                                     | -0.36 | 0.00001 |
| A_44_P592381  | RGD1563633   | PREDICTED: Rattus norvegicus similar to mKIAA0212 protein (LOC297504)_mRNA [XM_238366]                                                                             | -0.36 | 0.00000 |
| A_43_P15213   | RGD1311768   | PREDICTED: Rattus norvegicus similar to hypothetical protein FLJ32001 (predicted) (LOC360885)_mRNA [XM_341160]                                                     | -0.36 | 0.00000 |
| A_44_P795327  | TC528259     | Unknown                                                                                                                                                            | -0.37 | 0.00493 |
| A_44_P638274  | TC557487     | Q69566 (Q69566) U88_partial (5%) [TC557487]                                                                                                                        | -0.37 | 0.00233 |
| A_44_P717404  | TC568365     | Unknown                                                                                                                                                            | -0.37 | 0.00040 |
| A_44_P349199  | GRIA4        | Rattus norvegicus glutamate receptor_ionotropic_4 (Gria4)_mRNA [NM_017263]                                                                                         | -0.38 | 0.00292 |
| A_44_P670480  | TC528081     | Unknown                                                                                                                                                            | -0.38 | 0.00222 |
| A_44_P670043  | TC544335     | Q8BZ40 (Q8BZ40) Mus musculus adult male bone cDNA_RIKEN full-length enriched library_clone:9830169C09 product:ALANYL-TRNA SYNTHETASE (ALANINE--TRNA LIGASE) (ALARS | -0.38 | 0.00202 |
| A_44_P624624  | TC546683     | Unknown                                                                                                                                                            | -0.38 | 0.00102 |
| A_44_P657993  | GPR22        | PREDICTED: Rattus norvegicus G protein-coupled receptor 22 (predicted) (Gpr22_predicted)_mRNA [XM_234041]                                                          | -0.38 | 0.00091 |
| A_44_P1003623 | AI113137     | AI113137 UI-R-C2p-nr-h-02-0-UI.s1 UI-R-C2p Rattus norvegicus cDNA clone UI-R-C2p-nr-h-02-0-UI 3'_mRNA sequence [AI113137]                                          | -0.38 | 0.00020 |
| A_44_P792746  | TC558767     | Unknown                                                                                                                                                            | -0.38 | 0.00017 |
| A_44_P372874  | RGD1307166   | Rattus norvegicus similar to RIKEN cDNA 4930429H24 (LOC311114)_mRNA [XM_230006]                                                                                    | -0.38 | 0.00003 |
| A_44_P175893  | RGD1305721   | Rattus norvegicus similar to RIKEN cDNA 2810055F11 (LOC314214)_mRNA [XM_234277]                                                                                    | -0.38 | 0.00002 |
| A_43_P11684   | ALPL         | Rattus norvegicus alkaline phosphatase_tissue-nonspecific (Alpl)_mRNA [NM_013059]                                                                                  | -0.38 | 0.00001 |
| A_44_P685671  | TC527238     | Unknown                                                                                                                                                            | -0.38 | 0.00000 |
| A_44_P730004  | TC521879     | Unknown                                                                                                                                                            | -0.39 | 0.00358 |
| A_44_P152199  | NM_001014065 | Rattus norvegicus similar to RIKEN cDNA 2810028A01 (LOC313436)_mRNA [NM_001014065]                                                                                 | -0.39 | 0.00254 |
| A_44_P118630  | CALB1        | Rattus norvegicus calbindin 1 (Calb1)_mRNA [NM_031984]                                                                                                             | -0.39 | 0.00238 |
| A_44_P289080  | PTPRO        | Rattus norvegicus protein tyrosine phosphatase_receptor type_O (Ptpro)_mRNA [NM_017336]                                                                            | -0.39 | 0.00172 |
| A_44_P1049289 | PTPLB        | PREDICTED: Rattus norvegicus protein tyrosine phosphatase-like (proline instead of catalytic arginine)_member b (predicted) (Ptplb_predicted)_mRNA [XM_213610]     | -0.39 | 0.00127 |
| A_44_P998500  | RGD1309150   | Rattus norvegicus similar to RIKEN cDNA 4930449E07 (LOC287371)_mRNA [XM_213320]                                                                                    | -0.39 | 0.00008 |
| A_44_P819401  | AI407028     | AI407028 EST235316 Normalized rat ovary_Bento Soares Rattus sp. cDNA clone ROVDR70 3' end_mRNA sequence [AI407028]                                                 | -0.39 | 0.00005 |
| A_42_P489681  | BC085903     | Rattus norvegicus cDNA clone IMAGE:7193711 [BC085903]                                                                                                              | -0.39 | 0.00000 |
| A_44_P378536  | DV727383     | RVL19870 Wackym-Soares normalized rat vestibular cDNA library Rattus norvegicus cDNA 5'_mRNA sequence [DV727383]                                                   | -0.4  | 0.00095 |
| A_44_P593049  | TC526272     | Q8R4C3 (Q8R4C3) Csr1_partial (21%) [TC526272]                                                                                                                      | -0.4  | 0.00011 |
| A_44_P1006451 | TC542662     | TXN6_HUMAN (Q86XW9) Thioredoxin domain containing protein 6 (Thioredoxin-like protein 2) (Txl-2)_partial (40%) [TC542662]                                          | -0.4  | 0.00003 |
| A_44_P577250  | ZFP346       | Rattus norvegicus cDNA clone IMAGE:7319814_with apparent retained intron [BC087636]                                                                                | -0.4  | 0.00003 |
| A_44_P699859  | TC539563     | Q6TXI1 (Q6TXI1) LRRGT00018_partial (6%) [TC539563]                                                                                                                 | -0.4  | 0.00001 |
| A_44_P426717  | RGD1309839   | PREDICTED: Rattus norvegicus similar to hypothetical protein MGC26778 (predicted) (LOC291354)_mRNA [XM_225627]                                                     | -0.41 | 0.00442 |
| A_42_P659321  | BF551389     | BF551389 UI-R-C0-ip-a-08-0-UI.r1 UI-R-C0 Rattus norvegicus cDNA clone UI-R-C0-ip-a-08-0-UI 5'_mRNA sequence [BF551389]                                             | -0.41 | 0.00182 |
| A_42_P675879  | CYP4F4       | Rattus norvegicus cytochrome P450_family 4_subfamily f_polypeptide 4 (Cyp4f4)_mRNA [NM_173123]                                                                     | -0.41 | 0.00021 |

|               |              |                                                                                                                                                           |       |         |
|---------------|--------------|-----------------------------------------------------------------------------------------------------------------------------------------------------------|-------|---------|
| A_44_P931389  | TC526112     | Unknown                                                                                                                                                   | -0.41 | 0.00002 |
| A_44_P619439  | BF566748     | BF566748 UI-R-BJ0p-afg-h-01-0-UI.r1 UI-R-BJ0p Rattus norvegicus cDNA clone UI-R-BJ0p-afg-h-01-0-UI 5' mRNA sequence [BF566748]                            | -0.41 | 0.00000 |
| A_43_P14111   | KITL         | Rattus norvegicus scf mRNA for stem cell factor KL-2_ complete cds. [AB105879]                                                                            | -0.42 | 0.00416 |
| A_44_P842364  | TC565879     | Unknown                                                                                                                                                   | -0.42 | 0.00031 |
| A_42_P734688  | TEC          | PREDICTED: Rattus norvegicus tec protein tyrosine kinase (Tec)_ mRNA [XM_341208]                                                                          | -0.42 | 0.00020 |
| A_43_P10432   | TC559383     | Unknown                                                                                                                                                   | -0.42 | 0.00016 |
| A_44_P610377  | TC545318     | Unknown                                                                                                                                                   | -0.42 | 0.00004 |
| A_44_P918588  | TC528976     | Unknown                                                                                                                                                   | -0.42 | 0.00001 |
| A_44_P202470  | AA955742     | UI-R-E1-fg-c-10-0-UI.s1 UI-R-E1 Rattus norvegicus cDNA clone UI-R-E1-fg-c-10-0-UI 3' mRNA sequence [AA955742]                                             | -0.42 | 0.00001 |
| A_44_P562470  | TC543600     | Unknown                                                                                                                                                   | -0.42 | 0.00000 |
| A_42_P841193  | DDIT4L       | Rattus norvegicus DNA-damage-inducible transcript 4-like (Ddit4l)_ mRNA [NM_080399]                                                                       | -0.43 | 0.00104 |
| A_44_P868418  | AI043758     | AI043758 UI-R-C0-jm-b-11-0-UI.s1 UI-R-C0 Rattus norvegicus cDNA clone UI-R-C0-jm-b-11-0-UI 3' mRNA sequence [AI043758]                                    | -0.43 | 0.00001 |
| A_42_P787410  | CACNA1B      | Rattus norvegicus calcium channel_ voltage-dependent_ N type_ alpha 1B subunit (Cacna1b)_ mRNA [NM_147141]                                                | -0.43 | 0.00000 |
| A_44_P562894  | NM_001013222 | Rattus norvegicus Rho family GTPase 1 (Rnd1)_ mRNA [NM_001013222]                                                                                         | -0.43 | 0.00000 |
| A_44_P276919  | LOC367631    | PREDICTED: Rattus norvegicus similar to protein tyrosine phosphatase-like (proline instead of catalytic arginine)_ member b (LOC367631)_ mRNA [XM_346233] | -0.44 | 0.00105 |
| A_44_P286409  | TTK          | Rattus norvegicus similar to protein kinase (EC 2.7.1.-) esk splice form 2 - mouse (LOC315852)_ mRNA [XM_236477]                                          | -0.44 | 0.00036 |
| A_44_P1006058 | CTSK         | Rattus norvegicus cathepsin K (Ctsk)_ mRNA [NM_031560]                                                                                                    | -0.44 | 0.00021 |
| A_44_P948776  | TC545935     | Unknown                                                                                                                                                   | -0.44 | 0.00003 |
| A_43_P15246   | PTH1H        | Rattus norvegicus parathyroid hormone-like peptide (Pthlh)_ mRNA [NM_012636]                                                                              | -0.45 | 0.00393 |
| A_44_P746633  | TC542318     | Unknown                                                                                                                                                   | -0.45 | 0.00202 |
| A_44_P885793  | TC561295     | Unknown                                                                                                                                                   | -0.45 | 0.00087 |
| A_44_P523208  | RGD1311744   | Rattus norvegicus similar to RIKEN cDNA 5830475i06 (LOC300608)_ mRNA [XM_217114]                                                                          | -0.45 | 0.00004 |
| A_44_P1049275 | CB605666     | CB605666 AMGNNUC:MRBE3-00079-C3-Z rat brain E15 (10374) Rattus norvegicus cDNA clone mrbe3-00079-c3_ mRNA sequence [CB605666]                             | -0.45 | 0.00000 |
| A_44_P871211  | TC566645     | Unknown                                                                                                                                                   | -0.46 | 0.00416 |
| A_44_P853794  | TC523523     | Unknown                                                                                                                                                   | -0.46 | 0.00027 |
| A_42_P701855  | SLC4A11      | PREDICTED: Rattus norvegicus solute carrier family 4_ sodium bicarbonate transporter-like_ member 11 (predicted) (Slc4a11_predicted)_ mRNA [XM_230605]    | -0.46 | 0.00026 |
| A_44_P166967  | NM_001013032 | Rattus norvegicus neuropeptide Y receptor Y1 (Npy1r)_ mRNA [NM_001013032]                                                                                 | -0.46 | 0.00016 |
| A_44_P1008738 | AI137483     | AI137483 UI-R-C2p-ol-f-12-0-UI.s1 UI-R-C2p Rattus norvegicus cDNA clone UI-R-C2p-ol-f-12-0-UI 3' mRNA sequence [AI137483]                                 | -0.46 | 0.00014 |
| A_44_P366303  | MATN2        | PREDICTED: Rattus norvegicus matrilin 2 (predicted) (Matn2_predicted)_ mRNA [XM_216941]                                                                   | -0.47 | 0.00055 |
| A_44_P240867  | LHX2         | PREDICTED: Rattus norvegicus LIM homeobox protein 2 (predicted) (Lhx2_predicted)_ mRNA [XM_216050]                                                        | -0.47 | 0.00000 |
| A_44_P521946  | AA850244     | AA850244 EST193011 Normalized rat ovary_ Bento Soares Rattus sp. cDNA clone ROVAE19 5' end_ mRNA sequence [AA850244]                                      | -0.48 | 0.00020 |
| A_44_P458021  | TNFRSF11B    | Rattus norvegicus tumor necrosis factor receptor superfamily_ member 11b (osteoprotegerin) (Tnfrsf11b)_ mRNA [NM_012870]                                  | -0.49 | 0.00011 |
| A_44_P975779  | DV727686     | RVL20223 Wackym-Soares normalized rat vestibular cDNA library Rattus norvegicus cDNA 5' mRNA sequence [DV727686]                                          | -0.49 | 0.00009 |
| A_44_P962800  | TC531775     | Q6U4K6 (Q6U4K6) NS5A (Fragment)_ partial (5%) [TC531775]                                                                                                  | -0.5  | 0.00077 |
| A_44_P624280  | TC562720     | Unknown                                                                                                                                                   | -0.5  | 0.00021 |
| A_44_P763016  | TC527059     | Unknown                                                                                                                                                   | -0.5  | 0.00004 |
| A_44_P809777  | BF562739     | UI-R-BO0-aid-f-11-0-UI.r1 UI-R-BO0 Rattus norvegicus cDNA clone UI-R-BO0-aid-f-11-0-UI 5' mRNA sequence [BF562739]                                        | -0.5  | 0.00003 |
| A_44_P700424  | TC559298     | Unknown                                                                                                                                                   | -0.5  | 0.00000 |
| A_42_P559337  | AW918097     | EST349401 Rat gene index_ normalized rat_ norvegicus_ Bento Soares Rattus norvegicus cDNA clone RGIEM31 5' end_ mRNA sequence [AW918097]                  | -0.51 | 0.00000 |
| A_42_P619056  | GCNT2        | Rattus norvegicus glucosaminyl (N-acetyl) transferase 2_ l-branching enzyme (Gcnt2)_ mRNA [NM_001001511]                                                  | -0.52 | 0.00266 |
| A_42_P631453  | MATN2        | PREDICTED: Rattus norvegicus matrilin 2 (predicted) (Matn2_predicted)_ mRNA [XM_216941]                                                                   | -0.52 | 0.00081 |
| A_44_P463749  | RASD1        | PREDICTED: Rattus norvegicus RAS_ dexamethasone-induced 1 (Rasd1)_ mRNA [XM_340809]                                                                       | -0.54 | 0.00001 |
| A_44_P974063  | BF284864     | BF284864 EST449455 Rat Gene Index_ normalized rat_ Rattus norvegicus cDNA Rattus norvegicus cDNA clone RGIEX25_ mRNA sequence [BF284864]                  | -0.54 | 0.00000 |

|               |              |                                                                                                                                                                 |       |         |
|---------------|--------------|-----------------------------------------------------------------------------------------------------------------------------------------------------------------|-------|---------|
| A_44_P270395  | BF524138     | BF524138 UI-R-Y0-ux-c-12-0-UI.r1 UI-R-Y0 Rattus norvegicus cDNA clone UI-R-Y0-ux-c-12-0-UI 5'_ mRNA sequence [BF524138]                                         | -0.55 | 0.00008 |
| A_44_P205869  | GPR149       | Rattus norvegicus G protein-coupled receptor 149 (Gpr149)_ mRNA [NM_138891]                                                                                     | -0.57 | 0.00007 |
| A_44_P335241  | ALDH3B1      | Rattus norvegicus fatty aldehyde dehydrogenase-like (Aldh3b1)_ mRNA [NM_001006998]                                                                              | -0.59 | 0.00025 |
| A_44_P398529  | NM_001014183 | Rattus norvegicus similar to Protein C20orf103 precursor (RGD1306991)_ mRNA [NM_001014183]                                                                      | -0.59 | 0.00000 |
| A_42_P501479  | AW920686     | AW920686 EST351990 Rat gene index_ normalized rat_ norvegicus_ Bento Soares Rattus norvegicus cDNA clone RGIHB11 5' end_ mRNA sequence [AW920686]               | -0.61 | 0.00029 |
| A_44_P485948  | BF285957     | BF285957 EST450548 Rat Gene Index_ normalized rat_ Rattus norvegicus cDNA Rattus norvegicus cDNA clone RGIFL30_ mRNA sequence [BF285957]                        | -0.62 | 0.00001 |
| A_44_P1015754 | SLC22A3      | Rattus norvegicus solute carrier family 22_ member 3 (Slc22a3)_ mRNA [NM_019230]                                                                                | -0.63 | 0.00071 |
| A_44_P731946  | TC532125     | Q99NG8 (Q99NG8) T:G mismatch thymine glycosylase_ partial (15%) [TC532125]                                                                                      | -0.64 | 0.00017 |
| A_44_P128062  | BK           | Rattus norvegicus brain and kidney protein (Bk)_ mRNA [NM_138849]                                                                                               | -0.65 | 0.00020 |
| A_42_P481167  | GUCY1A3      | Rattus norvegicus guanylate cyclase 1_ soluble_ alpha 3 (Gucy1a3)_ mRNA [NM_017090]                                                                             | -0.66 | 0.00002 |
| A_44_P145290  | PVRL3        | PREDICTED: Rattus norvegicus poliovirus receptor-related 3 (predicted) (Pvrl3_predicted)_ mRNA [XM_213626]                                                      | -0.69 | 0.00058 |
| A_42_P473594  | EGR2         | Rattus norvegicus early growth response 2 (Egr2)_ mRNA [NM_053633]                                                                                              | -0.73 | 0.00011 |
| A_44_P371317  | HTR7         | Rattus norvegicus 5-hydroxytryptamine (serotonin) receptor 7 (Htr7)_ mRNA [NM_022938]                                                                           | -0.73 | 0.00000 |
| A_43_P12478   | CRH          | Rattus norvegicus corticotropin releasing hormone (Crh)_ mRNA [NM_031019]                                                                                       | -0.77 | 0.00390 |
| A_44_P748361  | TC568496     | Unknown                                                                                                                                                         | -0.84 | 0.00006 |
| A_44_P976358  | TC523929     | Unknown                                                                                                                                                         | -0.84 | 0.00001 |
| A_44_P988460  | AW142021     | AW142021 EST292136 Normalized rat ovary_ Bento Soares Rattus sp. cDNA clone RGICT88 5' end similar to transmembrane protein wolframin_ mRNA sequence [AW142021] | -0.86 | 0.00071 |
| A_42_P719221  | VIP          | PREDICTED: Rattus norvegicus vasoactive intestinal polypeptide (Vip)_ mRNA [XM_217838]                                                                          | -0.93 | 0.00003 |

**Supplementary Table 5. Genomic profiles of aged sprouting neurons at 7 day after stroke**

| ProbeName     | GeneName     | Description                                                                                                                                       | LogRatio | pValue  |
|---------------|--------------|---------------------------------------------------------------------------------------------------------------------------------------------------|----------|---------|
| A_44_P491796  | SPP1         | Rattus norvegicus secreted phosphoprotein 1 (Spp1)_ mRNA [NM_012881]                                                                              | 2.74     | 0.00000 |
| A_44_P1006058 | CTSK         | Rattus norvegicus cathepsin K (Ctsk)_ mRNA [NM_031560]                                                                                            | 1.39     | 0.00219 |
| A_42_P714311  | CCL3         | Rattus norvegicus chemokine (C-C motif) ligand 3 (Ccl3)_ mRNA [NM_013025]                                                                         | 1.27     | 0.00111 |
| A_44_P990376  | GPNMB        | Rattus norvegicus glycoprotein (transmembrane) nmb (Gpnm)_ mRNA [NM_133298]                                                                       | 1.23     | 0.00310 |
| A_44_P377266  | OLDLR1       | Rattus norvegicus oxidized low density lipoprotein (lectin-like) receptor 1 (Oldlr1)_ mRNA [NM_133306]                                            | 1.2      | 0.00275 |
| A_44_P462661  | IL1RN        | Rattus norvegicus interleukin 1 receptor antagonist (Il1rn)_ mRNA [NM_022194]                                                                     | 1.2      | 0.00475 |
| A_44_P366723  | IGF1         | Rattus norvegicus insulin-like growth factor 1 (Igf1)_ mRNA [NM_178866]                                                                           | 1.19     | 0.00011 |
| A_44_P1044658 | S43941       | insulin-like growth factor I (exon 6) [rats_Genomic/mRNA_7224 nt] [S43941]                                                                        | 1.11     | 0.00032 |
| A_43_P15750   | ADN          | PREDICTED: Rattus norvegicus adipsin (Adn)_ mRNA [XM_343169]                                                                                      | 1.06     | 0.00132 |
| A_44_P881475  | AA874941     | AA874941 UI-R-E0-ci-d-06-0-UI.s1 UI-R-E0 Rattus norvegicus cDNA clone UI-R-E0-ci-d-06-0-UI 3' similar to gi [AA874941]                            | 0.85     | 0.00487 |
| A_44_P126021  | IGF1         | Rat pre-pro-insulin-like growth factor mRNA_class C_5' end. [M17594]                                                                              | 0.84     | 0.00029 |
| A_42_P495969  | APOC1        | Rattus norvegicus apolipoprotein C-I (Apoc1)_ mRNA [NM_012824]                                                                                    | 0.76     | 0.00292 |
| A_44_P304024  | GMFG         | Rattus norvegicus glia maturation factor_ gamma (Gmfg)_ mRNA [NM_181091]                                                                          | 0.74     | 0.00456 |
| A_43_P12841   | ENPP1        | Rattus norvegicus ectonucleotide pyrophosphatase/phosphodiesterase 1 (Enpp1)_ mRNA [NM_053535]                                                    | 0.73     | 0.00497 |
| A_44_P131986  | GPR6         | Rattus norvegicus G protein-coupled receptor 6 (Gpr6)_ mRNA [NM_031806]                                                                           | 0.68     | 0.00211 |
| A_42_P518855  | BCL2A1       | Rattus norvegicus B-cell leukemia/lymphoma 2 related protein A1 (Bcl2a1)_ mRNA [NM_133416]                                                        | 0.67     | 0.00240 |
| A_42_P458530  | RIPK3        | Rattus norvegicus receptor-interacting serine-threonine kinase 3 (Ripk3)_ mRNA [NM_139342]                                                        | 0.65     | 0.00382 |
| A_44_P608078  | TC539937     | Unknown                                                                                                                                           | 0.64     | 0.00303 |
| A_43_P11376   | AW916994     | AW916994 EST348298 Rat gene index_ normalized rat_ norvegicus_ Bento Soares Rattus norvegicus cDNA clone RGIDX71 5' end_ mRNA sequence [AW916994] | 0.63     | 0.00457 |
| A_43_P18226   | MYO1F        | PREDICTED: Rattus norvegicus myosin IF (predicted) (Myo1f_predicted)_ mRNA [XM_234942]                                                            | 0.62     | 0.00281 |
| A_42_P462354  | SVIL         | PREDICTED: Rattus norvegicus supervillin (predicted) (Svil_predicted)_ mRNA [XM_341540]                                                           | 0.61     | 0.00002 |
| A_42_P461587  | NGFB MAPPED  | PREDICTED: Rattus norvegicus nerve growth factor_ beta (Ngfb)_ mRNA [XM_227525]                                                                   | 0.61     | 0.00016 |
| A_42_P468216  | NM_001030026 | Rattus norvegicus interferon gamma inducible protein 30 (Ifi30)_ mRNA [NM_001030026]                                                              | 0.6      | 0.00134 |
| A_44_P634789  | AW143623     | AW143623 EST293919 Normalized rat embryo_ Bento Soares Rattus sp. cDNA clone RGIBW71 5' end_ mRNA sequence [AW143623]                             | 0.59     | 0.00013 |
| A_44_P185673  | BE115614     | BE115614 UI-R-BJ1-aww-h-12-0-UI.s1 UI-R-BJ1 Rattus norvegicus cDNA clone UI-R-BJ1-aww-h-12-0-UI 3'_ mRNA sequence [BE115614]                      | 0.58     | 0.00009 |
| A_44_P766678  | BF557813     | BF557813 UI-R-C0-gw-g-05-0-UI.r1 UI-R-C0 Rattus norvegicus cDNA clone UI-R-C0-gw-g-05-0-UI 5'_ mRNA sequence [BF557813]                           | 0.57     | 0.00011 |
| A_44_P409022  | AI178706     | AI178706 EST222387 Normalized rat placenta_ Bento Soares Rattus sp. cDNA clone RPLCU55 3' end_ mRNA sequence [AI178706]                           | 0.57     | 0.00129 |
| A_44_P473780  | BE104219     | BE104219 UI-R-BX0-arm-c-01-0-UI.s1 UI-R-BX0 Rattus norvegicus cDNA clone UI-R-BX0-arm-c-01-0-UI 3'_ mRNA sequence [BE104219]                      | 0.56     | 0.00042 |
| A_42_P505241  | QPRT         | Rattus norvegicus quinolinate phosphoribosyltransferase (Qprt)_ mRNA [NM_001009646]                                                               | 0.55     | 0.00264 |
| A_44_P787598  | AW915403     | AW915403 EST346707 Normalized rat embryo_ Bento Soares Rattus sp. cDNA clone RGICV05 5' end_ mRNA sequence [AW915403]                             | 0.53     | 0.00001 |
| A_44_P641058  | RBPSUH       | PREDICTED: Rattus norvegicus recombining binding protein suppressor of hairless (Drosophila) (predicted) (Rbpsuh_predicted)_ mRNA [XM_232595]     | 0.53     | 0.00048 |
| A_44_P212551  | CCL4         | Rattus norvegicus small inducible cytokine A4 (Ccl4)_ mRNA [NM_053858]                                                                            | 0.53     | 0.00211 |
| A_44_P755803  | AI145976     | AI145976 UI-R-BT0-qc-g-05-0-UI.s1 UI-R-BT0 Rattus norvegicus cDNA clone UI-R-BT0-qc-g-05-0-UI 3'_ mRNA sequence [AI145976]                        | 0.52     | 0.00279 |
| A_43_P12955   | FCCR3        | PREDICTED: Rattus norvegicus similar to Fc gamma (IgG) receptor II (low affinity) alpha precursor - rat (LOC498276)_ mRNA [XM_573502]             | 0.52     | 0.00348 |
| A_44_P145438  | BF401593     | BF401593 UI-R-CA0-bgm-d-11-0-UI.s1 UI-R-CA0 Rattus norvegicus cDNA clone UI-R-CA0-bgm-d-11-0-UI 3'_ mRNA sequence [BF401593]                      | 0.51     | 0.00173 |
| A_44_P500457  | BI275926     | BI275926 UI-R-CX0-bxi-b-04-0-UI.s1 UI-R-CX0 Rattus norvegicus cDNA clone UI-R-CX0-bxi-b-04-0-UI 3'_ mRNA sequence [BI275926]                      | 0.51     | 0.00439 |
| A_44_P315672  | K02813       | RATGLU6 Rat glucagon gene_ exon 6 [K02813]                                                                                                        | 0.5      | 0.00000 |
| A_44_P341120  | AI103284     | AI103284 EST212573 Normalized rat embryo_ Bento Soares Rattus sp. cDNA clone REMBZ67 3' end_ mRNA sequence [AI103284]                             | 0.5      | 0.00030 |
| A_42_P596942  | FILIP1       | Rattus norvegicus filamin A interacting protein 1 (Filip1)_ mRNA [NM_145682]                                                                      | 0.5      | 0.00081 |
| A_44_P479890  | PRRX1        | Rattus norvegicus paired related homeobox 1 (Prrx1)_ mRNA [NM_153821]                                                                             | 0.5      | 0.00113 |

|               |                               |                                                                                                                                                        |      |         |
|---------------|-------------------------------|--------------------------------------------------------------------------------------------------------------------------------------------------------|------|---------|
| A_44_P463980  | <a href="#">RGD1565332</a>    | PREDICTED: Rattus norvegicus similar to interferon induced transmembrane protein 3 (LOC289685)_ mRNA [XM_223483]                                       | 0.49 | 0.00003 |
| A_44_P432470  | <a href="#">AA999008</a>      | AA999008 UI-R-C0-ih-d-11-0-UI.s1 UI-R-C0 Rattus norvegicus cDNA clone UI-R-C0-ih-d-11-0-UI 3' mRNA sequence [AA999008]                                 | 0.49 | 0.00146 |
| A_44_P520190  | <a href="#">SECSL1</a>        | Rattus norvegicus Rsec5 protein (Sec5l1)_ mRNA [NM_134414]                                                                                             | 0.49 | 0.00156 |
| A_44_P1051260 | <a href="#">AW144101</a>      | AW144101 EST294397 Normalized rat embryo_Bento Soares Rattus sp. cDNA clone RGIC108 5' end_ mRNA sequence [AW144101]                                   | 0.48 | 0.00073 |
| A_44_P1024729 | <a href="#">BF558358</a>      | BF558358 UI-R-E0-dm-f-02-0-UI.r1 UI-R-E0 Rattus norvegicus cDNA clone UI-R-E0-dm-f-02-0-UI 5' mRNA sequence [BF558358]                                 | 0.48 | 0.00136 |
| A_44_P845409  | <a href="#">AW913993</a>      | AW913993 EST294771 Rat gene index_ normalized rat_ norvegicus_ Bento Soares Rattus norvegicus cDNA clone RGIZA25 5' end_ mRNA sequence [AW913993]      | 0.47 | 0.00014 |
| A_44_P662803  | <a href="#">A_44_P662803</a>  | Unknown                                                                                                                                                | 0.47 | 0.00122 |
| A_44_P135277  | <a href="#">ALCAM</a>         | Rattus norvegicus activated leukocyte cell adhesion molecule (Alcam)_ mRNA [NM_031753]                                                                 | 0.46 | 0.00005 |
| A_43_P10856   | <a href="#">RGD1563950</a>    | PREDICTED: Rattus norvegicus similar to NF-kappa-B-repressing factor (NFKB-repressing factor) (Transcription factor NRF) (LOC298316)_ mRNA [XM_233308] | 0.46 | 0.00008 |
| A_44_P995681  | <a href="#">MELK</a>          | Rattus norvegicus similar to protein kinase PK38 (LOC362510)_ mRNA [XM_342828]                                                                         | 0.46 | 0.00058 |
| A_44_P368192  | <a href="#">XM_228096</a>     | Rattus norvegicus similar to protocadherin (LOC294352)_ mRNA [XM_228096]                                                                               | 0.45 | 0.00005 |
| A_43_P19763   | <a href="#">TLR2</a>          | Rattus norvegicus toll-like receptor 2 (Tlr2)_ mRNA [NM_198769]                                                                                        | 0.45 | 0.00009 |
| A_44_P154164  | <a href="#">A_44_P154164</a>  | Unknown                                                                                                                                                | 0.45 | 0.00016 |
| A_44_P137322  | <a href="#">LHX9</a>          | Rattus norvegicus LIM homeobox 9 (Lhx9)_ mRNA [NM_181367]                                                                                              | 0.45 | 0.00053 |
| A_43_P11749   | <a href="#">HCK</a>           | Rattus norvegicus hemopoietic cell kinase (Hck)_ mRNA [NM_013185]                                                                                      | 0.45 | 0.00125 |
| A_42_P812263  | <a href="#">SAT_MAPPED</a>    | Rattus norvegicus spermidine/spermine N1-acetyl transferase (mapped) (Sat_mapped)_ mRNA [NM_001007667]                                                 | 0.45 | 0.00153 |
| A_44_P175846  | <a href="#">LOC307671</a>     | PREDICTED: Rattus norvegicus similar to HBxAg transactivated protein 2 (LOC307671)_ mRNA [XM_226278]                                                   | 0.44 | 0.00000 |
| A_44_P392670  | <a href="#">AA944343</a>      | AA944343 EST199842 Normalized rat embryo_Bento Soares Rattus sp. cDNA clone REMAF65 3' end_ mRNA sequence [AA944343]                                   | 0.44 | 0.00007 |
| A_44_P638274  | <a href="#">TC557487</a>      | Q69566 (Q69566) U88_ partial (5%) [TC557487]                                                                                                           | 0.44 | 0.00028 |
| A_44_P543813  | <a href="#">HELIC1</a>        | PREDICTED: Rattus norvegicus helicase_ATP binding 1 (predicted) (Helic1_predicted)_ mRNA [XM_228345]                                                   | 0.44 | 0.00349 |
| A_44_P1036481 | <a href="#">RGD1566064</a>    | PREDICTED: Rattus norvegicus similar to KIAA1096 protein (LOC360865)_ mRNA [XM_341141]                                                                 | 0.43 | 0.00000 |
| A_44_P1036480 | <a href="#">LOC307671</a>     | PREDICTED: Rattus norvegicus similar to HBxAg transactivated protein 2 (LOC307671)_ mRNA [XM_226278]                                                   | 0.43 | 0.00000 |
| A_44_P353672  | <a href="#">KCND2</a>         | Rattus norvegicus potassium voltage gated channel_ Shal-related family_ member 2 (Kcnd2)_ mRNA [NM_031730]                                             | 0.43 | 0.00432 |
| A_43_P22936   | <a href="#">AKAP3</a>         | Rattus norvegicus A-kinase anchor protein 3 (Akap3)_ mRNA [NM_001005557]                                                                               | 0.42 | 0.00001 |
| A_44_P371984  | <a href="#">DPP4</a>          | Rat bile canaliculus domain-specific membrane glycoprotein mRNA_ complete cds. [J02997]                                                                | 0.42 | 0.00014 |
| A_44_P227680  | <a href="#">CA508481</a>      | CA508481 UI-R-FS0-cqn-d-12-0-UI.s1 NCI_CGAP_FS0 Rattus norvegicus cDNA clone IMAGE:7355582 3' mRNA sequence [CA508481]                                 | 0.42 | 0.00030 |
| A_42_P807697  | <a href="#">TYROBP</a>        | Rattus norvegicus Tyro protein tyrosine kinase binding protein (Tyrobp)_ mRNA [NM_212525]                                                              | 0.42 | 0.00073 |
| A_44_P167205  | <a href="#">AI229849</a>      | AI229849 EST226544 Normalized rat embryo_Bento Soares Rattus sp. cDNA clone REMCN39 3' end_ mRNA sequence [AI229849]                                   | 0.42 | 0.00202 |
| A_44_P393706  | <a href="#">RGD1309701</a>    | PREDICTED: Rattus norvegicus similar to RIKEN cDNA 9130005N14 (predicted) (LOC316729)_ mRNA [XM_237514]                                                | 0.42 | 0.00451 |
| A_44_P212922  | <a href="#">RGD1565029</a>    | PREDICTED: Rattus norvegicus similar to 4632409L22Rik protein (LOC308361)_ mRNA [XM_218291]                                                            | 0.41 | 0.00003 |
| A_42_P598412  | <a href="#">APOBEC1</a>       | Rattus norvegicus apolipoprotein B editing complex 1 (Apohec1)_ mRNA [NM_012907]                                                                       | 0.41 | 0.00059 |
| A_44_P421003  | <a href="#">AI030249</a>      | AI030249 UI-R-C0-it-d-04-0-UI.s1 UI-R-C0 Rattus norvegicus cDNA clone UI-R-C0-it-d-04-0-UI 3' mRNA sequence [AI030249]                                 | 0.41 | 0.00219 |
| A_44_P976687  | <a href="#">TC559328</a>      | Unknown                                                                                                                                                | 0.41 | 0.00292 |
| A_44_P868418  | <a href="#">AI043758</a>      | AI043758 UI-R-C0-jm-b-11-0-UI.s1 UI-R-C0 Rattus norvegicus cDNA clone UI-R-C0-jm-b-11-0-UI 3' mRNA sequence [AI043758]                                 | 0.4  | 0.00000 |
| A_44_P121839  | <a href="#">RGD1566268</a>    | Rattus norvegicus similar to 40S ribosomal protein SA (P40) (34/67 kDa laminin receptor) (LOC366596)_ mRNA [XM_345657]                                 | 0.4  | 0.00034 |
| A_44_P300788  | <a href="#">KCNA3</a>         | Rattus norvegicus potassium voltage-gated channel_ shaker-related subfamily_ member 3 (Kcna3)_ mRNA [NM_019270]                                        | 0.4  | 0.00034 |
| A_42_P584734  | <a href="#">GDF10</a>         | Rattus norvegicus growth differentiation factor 10 (Gdf10)_ mRNA [NM_024375]                                                                           | 0.4  | 0.00107 |
| A_44_P915588  | <a href="#">TC542077</a>      | Q28774 (Q28774) Zinc finger protein 91 (Fragment)_ partial (19%) [TC542077]                                                                            | 0.4  | 0.00267 |
| A_44_P732045  | <a href="#">A_44_P732045</a>  | Unknown                                                                                                                                                | 0.4  | 0.00402 |
| A_44_P578505  | <a href="#">TC544660</a>      | Unknown                                                                                                                                                | 0.39 | 0.00004 |
| A_44_P451071  | <a href="#">PRKCD</a>         | Rattus norvegicus protein kinase C_delta (Prkcd)_ mRNA [NM_133307]                                                                                     | 0.39 | 0.00021 |
| A_43_P11955   | <a href="#">SYN2</a>          | Rattus norvegicus synapsin II (Syn2)_ transcript variant 2_ mRNA [NM_019159]                                                                           | 0.39 | 0.00041 |
| A_44_P590658  | <a href="#">ENSRNOT000000</a> | Unknown                                                                                                                                                | 0.39 | 0.00089 |

|               |                              |                                                                                                                                                   |      |         |
|---------------|------------------------------|---------------------------------------------------------------------------------------------------------------------------------------------------|------|---------|
| A 44 P538488  | <a href="#">OLR47</a>        | Rattus norvegicus olfactory receptor 47 (predicted) (Olr47_predicted)_ mRNA [NM_001000123]                                                        | 0.39 | 0.00103 |
| A 44 P845705  | <a href="#">A 44 P845705</a> | Unknown                                                                                                                                           | 0.39 | 0.00159 |
| A 42 P514585  | <a href="#">TPT1</a>         | Rattus norvegicus tumor protein_ translationally-controlled 1 (Tpt1)_ mRNA [NM_053867]                                                            | 0.39 | 0.00182 |
| A 44 P288300  | <a href="#">XM 219699</a>    | Rattus norvegicus similar to 60S ribosomal protein L36 (LOC309249)_ mRNA [XM_219699]                                                              | 0.39 | 0.00333 |
| A 44 P239368  | <a href="#">AA858877</a>     | AA858877 UI-R-A0-bd-b-06-0-UI.s1 UI-R-A0 Rattus norvegicus cDNA clone UI-R-A0-bd-b-06-0-UI 3' similar to gb [AA858877]                            | 0.39 | 0.00356 |
| A 44 P1036513 | <a href="#">RGD1566117</a>   | PREDICTED: Rattus norvegicus similar to hypothetical protein FLJ23033 (LOC310982)_ mRNA [XM_227828]                                               | 0.39 | 0.00380 |
| A 44 P339741  | <a href="#">NM_001025270</a> | Rattus norvegicus melanocortin 3 receptor (Mc3r)_ mRNA [NM_001025270]                                                                             | 0.38 | 0.00010 |
| A 44 P313315  | <a href="#">AI407830</a>     | AI407830 EST236120 Normalized rat ovary_ Bento Soares Rattus sp. cDNA clone ROVEC37 3' end_ mRNA sequence [AI407830]                              | 0.38 | 0.00032 |
| A 44 P170382  | <a href="#">SLC18A2</a>      | Rattus norvegicus solute carrier family 18 (vesicular monoamine)_ member 2 (Slc18a2)_ mRNA [NM_013031]                                            | 0.38 | 0.00054 |
| A 44 P855333  | <a href="#">TC530092</a>     | Unknown                                                                                                                                           | 0.38 | 0.00070 |
| A 42 P768732  | <a href="#">AW918387</a>     | AW918387 EST349691 Rat gene index_ normalized rat_ norvegicus_ Bento Soares Rattus norvegicus cDNA clone RGIER58 5' end_ mRNA sequence [AW918387] | 0.38 | 0.00196 |
| A 44 P1019604 | <a href="#">UBE2C</a>        | PREDICTED: Rattus norvegicus ubiquitin-conjugating enzyme E2C (predicted) (Ube2c_predicted)_ mRNA [XM_215924]                                     | 0.38 | 0.00438 |
| A 43 P21509   | <a href="#">RGD1307626</a>   | PREDICTED: Rattus norvegicus similar to Ribonuclease III (RNase III) (p241) (predicted) (RGD1307626_predicted)_ mRNA [XM_226843]                  | 0.37 | 0.00008 |
| A 44 P454232  | <a href="#">SCGN</a>         | Rattus norvegicus secretagogin_ EF-hand calcium binding protein (Scgn)_ mRNA [NM_201561]                                                          | 0.37 | 0.00032 |
| A 44 P831621  | <a href="#">CB327359</a>     | UI-R-F50-crs-d-09-0-UI.s1 UI-R-F50 Rattus norvegicus cDNA clone UI-R-F50-crs-d-09-0-UI 3'_ mRNA sequence [CB327359]                               | 0.37 | 0.00058 |
| A 43 P16369   | <a href="#">OLR1413</a>      | Rattus norvegicus olfactory receptor 1413 (Olr1413)_ mRNA [NM_214821]                                                                             | 0.37 | 0.00205 |
| A 44 P757007  | <a href="#">XM 573814</a>    | PREDICTED: Rattus norvegicus bone morphogenetic protein 1 (procollagen C-proteinase) (Bmp1)_ mRNA [XM_573814]                                     | 0.37 | 0.00248 |
| A 43 P12618   | <a href="#">NR1H3</a>        | Rattus norvegicus nuclear receptor subfamily 1_ group H_ member 3 (Nr1h3)_ mRNA [NM_031627]                                                       | 0.37 | 0.00332 |
| A 44 P853879  | <a href="#">TC523565</a>     | Unknown                                                                                                                                           | 0.37 | 0.00489 |
| A 44 P654498  | <a href="#">TC559522</a>     | Unknown                                                                                                                                           | 0.36 | 0.00001 |
| A 42 P773816  | <a href="#">CD1D1</a>        | Rattus norvegicus CD1d1 antigen (Cd1d1)_ mRNA [NM_017079]                                                                                         | 0.36 | 0.00008 |
| A 44 P409452  | <a href="#">LOC266771</a>    | Rattus norvegicus putative pheromone receptor VN6 (LOC266771)_ mRNA [NM_153729]                                                                   | 0.36 | 0.00024 |
| A 44 P542081  | <a href="#">BG375265</a>     | BG375265 UI-R-CV1-bsy-d-01-0-UI.s1 UI-R-CV1 Rattus norvegicus cDNA clone UI-R-CV1-bsy-d-01-0-UI 3'_ mRNA sequence [BG375265]                      | 0.36 | 0.00024 |
| A 44 P401955  | <a href="#">XM 576251</a>    | PREDICTED: Rattus norvegicus similar to RIKEN cDNA 3110006P09 (LOC500855)_ mRNA [XM_576251]                                                       | 0.36 | 0.00050 |
| A 42 P728794  | <a href="#">RGD1562444</a>   | PREDICTED: Rattus norvegicus similar to Sushi-repeat containing protein (LOC317181)_ mRNA [XM_228444]                                             | 0.36 | 0.00067 |
| A 44 P193486  | <a href="#">AA997511</a>     | AA997511 UI-R-C0-hw-g-02-0-UI.s1 UI-R-C0 Rattus norvegicus cDNA clone UI-R-C0-hw-g-02-0-UI 3'_ mRNA sequence [AA997511]                           | 0.36 | 0.00068 |
| A 44 P137805  | <a href="#">LOC293553</a>    | Rattus norvegicus similar to glyceraldehyde-3-phosphate dehydrogenase (LOC293553)_ mRNA [XM_219385]                                               | 0.36 | 0.00189 |
| A 44 P517944  | <a href="#">XM 217706</a>    | Rattus norvegicus similar to ferritin light chain - mouse (LOC308039)_ mRNA [XM_217706]                                                           | 0.36 | 0.00275 |
| A 44 P192568  | <a href="#">GM2A</a>         | Rattus norvegicus GM2 ganglioside activator protein (Gm2a)_ mRNA [NM_172335]                                                                      | 0.36 | 0.00412 |
| A 44 P127156  | <a href="#">M55017</a>       | RATNUCIA2 Rat nucleolin gene [M55017]                                                                                                             | 0.35 | 0.00006 |
| A 44 P1042598 | <a href="#">CB325841</a>     | UI-R-DZ0-cro-m-17-0-UI.s1 UI-R-DZ0 Rattus norvegicus cDNA clone UI-R-DZ0-cro-m-17-0-UI 3'_ mRNA sequence [CB325841]                               | 0.35 | 0.00009 |
| A 43 P14062   | <a href="#">BTG1</a>         | Rattus norvegicus B-cell translocation gene 1_ anti-proliferative (Btg1)_ mRNA [NM_017258]                                                        | 0.35 | 0.00019 |
| A 44 P221077  | <a href="#">NM_001017479</a> | Rattus norvegicus similar to RIKEN cDNA 1810057C19 (MGC108778)_ mRNA [NM_001017479]                                                               | 0.35 | 0.00065 |
| A 44 P518176  | <a href="#">RGD1307673</a>   | PREDICTED: Rattus norvegicus similar to hypothetical protein MDS025 (predicted) (LOC291034)_ mRNA [XM_214448]                                     | 0.35 | 0.00077 |
| A 44 P491187  | <a href="#">BM386513</a>     | BM386513 UI-R-CN1-cjg-o-03-0-UI.s1 UI-R-CN1 Rattus norvegicus cDNA clone UI-R-CN1-cjg-o-03-0-UI 3'_ mRNA sequence [BM386513]                      | 0.35 | 0.00114 |
| A 44 P1014902 | <a href="#">AQR</a>          | PREDICTED: Rattus norvegicus aquarius (predicted) (Aqr_predicted)_ mRNA [XM_345418]                                                               | 0.35 | 0.00175 |
| A 44 P272327  | <a href="#">RGD1308796</a>   | PREDICTED: Rattus norvegicus similar to RIKEN cDNA 4732474A20 gene (predicted) (LOC299566)_ mRNA [XM_234837]                                      | 0.34 | 0.00016 |
| A 44 P328311  | <a href="#">A 44 P328311</a> | Unknown                                                                                                                                           | 0.34 | 0.00017 |
| A 44 P331765  | <a href="#">XM 576251</a>    | PREDICTED: Rattus norvegicus similar to RIKEN cDNA 3110006P09 (LOC500855)_ mRNA [XM_576251]                                                       | 0.34 | 0.00052 |
| A 44 P537143  | <a href="#">BG374034</a>     | BG374034 UI-R-CV1-bsl-f-10-0-UI.s1 UI-R-CV1 Rattus norvegicus cDNA clone UI-R-CV1-bsl-f-10-0-UI 3'_ mRNA sequence [BG374034]                      | 0.34 | 0.00059 |
| A 44 P778162  | <a href="#">CX569250</a>     | RVL178 Wackym-Soares normalized rat vestibular cDNA library Rattus norvegicus cDNA 5'_ mRNA sequence [CX569250]                                   | 0.34 | 0.00233 |
| A 44 P440923  | <a href="#">RPL18</a>        | Rattus norvegicus ribosomal protein L18 (Rpl18)_ mRNA [NM_031102]                                                                                 | 0.34 | 0.00301 |
| A 44 P492879  | <a href="#">LOC312299</a>    | Rattus norvegicus similar to mEnx-1 (LOC312299)_ mRNA [XM_231705]                                                                                 | 0.34 | 0.00395 |

|              |              |                                                                                                                                                                                      |      |         |
|--------------|--------------|--------------------------------------------------------------------------------------------------------------------------------------------------------------------------------------|------|---------|
| A 44_P108398 | AA925341     | AA925341 UI-R-A1-ee-a-10-0-UI.s1 UI-R-A1 Rattus norvegicus cDNA clone UI-R-A1-ee-a-10-0-UI 3' similar to gi [AA925341]                                                               | 0.33 | 0.00001 |
| A 43_P20159  | ATRX         | PREDICTED: Rattus norvegicus alpha thalassemia/mental retardation syndrome X-linked homolog (human) (Atrx)_ mRNA [XM_217570]                                                         | 0.33 | 0.00001 |
| A 44_P465798 | BF397977     | BF397977 UI-R-BS2-bef-h-06-0-UI.s1 UI-R-BS2 Rattus norvegicus cDNA clone UI-R-BS2-bef-h-06-0-UI 3'_ mRNA sequence [BF397977]                                                         | 0.33 | 0.00002 |
| A 44_P853208 | NM_001017485 | Rattus norvegicus similar to RIKEN cDNA 2810453106 (LOC498145)_ mRNA [NM_001017485]                                                                                                  | 0.33 | 0.00007 |
| A 44_P373222 | NSG2         | Rattus norvegicus similar to p19 (LOC363557)_ mRNA [XM_343871]                                                                                                                       | 0.33 | 0.00020 |
| A 44_P597380 | BF564712     | UI-R-BU0-amw-c-10-0-UI.r1 UI-R-BU0 Rattus norvegicus cDNA clone UI-R-BU0-amw-c-10-0-UI 5'_ mRNA sequence [BF564712]                                                                  | 0.33 | 0.00028 |
| A 44_P247923 | STMN4        | PREDICTED: Rattus norvegicus stathmin-like 4 (Stmn4)_ mRNA [XM_341341]                                                                                                               | 0.33 | 0.00028 |
| A 42_P600796 | RGD1563761   | PREDICTED: Rattus norvegicus similar to RIKEN cDNA 2900091E11 (LOC299707)_ mRNA [XM_216873]                                                                                          | 0.33 | 0.00036 |
| A 44_P953424 | A 44_P953424 | Unknown                                                                                                                                                                              | 0.33 | 0.00049 |
| A 44_P563610 | TC544530     | Unknown                                                                                                                                                                              | 0.33 | 0.00069 |
| A 44_P153541 | AI169257     | AI169257 EST215092 Normalized rat kidney_ Bento Soares Rattus sp. cDNA clone RKIBP39 3' end_ mRNA sequence [AI169257]                                                                | 0.33 | 0.00141 |
| A 42_P606938 | RPL18        | Rattus norvegicus ribosomal protein L18 (Rpl18)_ mRNA [NM_031102]                                                                                                                    | 0.33 | 0.00190 |
| A 44_P153463 | BQ204181     | BQ204181 UI-R-DN1-cmv-h-07-0-UI.s1 UI-R-DN1 Rattus norvegicus cDNA clone UI-R-DN1-cmv-h-07-0-UI 3'_ mRNA sequence [BQ204181]                                                         | 0.33 | 0.00243 |
| A 44_P173320 | RGD1561919   | PREDICTED: Rattus norvegicus similar to ribosomal protein S18 (LOC307665)_ mRNA [XM_226269]                                                                                          | 0.33 | 0.00362 |
| A 43_P11210  | NM_001034150 | Rattus norvegicus signal recognition particle receptor ('docking protein') (Srpr)_ mRNA [NM_001034150]                                                                               | 0.33 | 0.00439 |
| A 44_P873329 | TC568157     | Unknown                                                                                                                                                                              | 0.33 | 0.00467 |
| A 43_P22919  | SORCS3       | PREDICTED: Rattus norvegicus sortilin-related VPS10 domain containing receptor 3 (predicted) (Sorcs3_predicted)_ mRNA [XM_219998]                                                    | 0.32 | 0.00000 |
| A 44_P107000 | AI409747     | AI409747 EST238039 Normalized rat placenta_ Bento Soares Rattus sp. cDNA clone RPLDI25 3' end_ mRNA sequence [AI409747]                                                              | 0.32 | 0.00000 |
| A 44_P555976 | BM388581     | BM388581 UI-R-DZ0-ckm-m-22-0-UI.s1 NCI_CGAP_DZ0 Rattus norvegicus cDNA clone IMAGE:7337760 3'_ mRNA sequence [BM388581]                                                              | 0.32 | 0.00003 |
| A 44_P542887 | NM_001014207 | Rattus norvegicus similar to RIKEN cDNA 4930553M18 (RGD1309627)_ mRNA [NM_001014207]                                                                                                 | 0.32 | 0.00014 |
| A 44_P471886 | BF567963     | BF567963 UI-R-BO0-ahw-c-11-0-UI.r1 UI-R-BO0 Rattus norvegicus cDNA clone UI-R-BO0-ahw-c-11-0-UI 5'_ mRNA sequence [BF567963]                                                         | 0.32 | 0.00018 |
| A 44_P665620 | AA858642     | AA858642 UI-R-E0-bq-d-10-0-UI.s1 UI-R-E0 Rattus norvegicus cDNA clone UI-R-E0-bq-d-10-0-UI 3' similar to dbj [AA858642]                                                              | 0.32 | 0.00020 |
| A 44_P579132 | DV718664     | RVL9279 Wackym-Soares normalized rat vestibular cDNA library Rattus norvegicus cDNA 5'_ mRNA sequence [DV718664]                                                                     | 0.32 | 0.00020 |
| A 44_P793538 | TC528231     | Unknown                                                                                                                                                                              | 0.32 | 0.00022 |
| A 44_P524583 | AI232320     | AI232320 EST229008 Normalized rat kidney_ Bento Soares Rattus sp. cDNA clone RKICA20 3' end similar to similar to mitochondrial 3-hydroxy-3-methylglutaryl-CoA synthase_ mRNA sequen | 0.32 | 0.00031 |
| A 44_P551285 | BF284167     | BF284167 EST448758 Rat Gene Index_ normalized rat_ Rattus norvegicus cDNA Rattus norvegicus cDNA clone RGIEL77 3' sequence_ mRNA sequence [BF284167]                                 | 0.32 | 0.00049 |
| A 44_P332834 | RGD1566336   | Rattus norvegicus similar to RIKEN cDNA 4933440J22 (LOC308064)_ mRNA [XM_217737]                                                                                                     | 0.32 | 0.00111 |
| A 44_P355902 | SLC8A2       | Rattus norvegicus solute carrier family 8 (sodium/calcium exchanger)_ member 2 (Slc8a2)_ mRNA [NM_078619]                                                                            | 0.32 | 0.00145 |
| A 44_P827202 | TC531906     | Unknown                                                                                                                                                                              | 0.32 | 0.00251 |
| A 44_P995676 | BF523077     | BF523077 UI-R-C2p-qx-a-03-0-UI.r1 UI-R-C2p Rattus norvegicus cDNA clone UI-R-C2p-qx-a-03-0-UI 5'_ mRNA sequence [BF523077]                                                           | 0.32 | 0.00277 |
| A 44_P863776 | AW143280     | EST293576 Normalized rat brain_ Bento Soares Rattus sp. cDNA clone RGIBJ34 5' end_ mRNA sequence [AW143280]                                                                          | 0.32 | 0.00334 |
| A 44_P234420 | HPRT         | PREDICTED: Rattus norvegicus similar to PHD finger protein 6 (LOC503479)_ mRNA [XM_579036]                                                                                           | 0.32 | 0.00403 |
| A 44_P334709 | RPS14        | Rattus norvegicus ribosomal protein S14 (Rps14)_ mRNA [NM_022672]                                                                                                                    | 0.32 | 0.00430 |
| A 44_P593049 | TC526272     | Q8R4C3 (Q8R4C3) Csr1_ partial (21%) [TC526272]                                                                                                                                       | 0.31 | 0.00001 |
| A 44_P192058 | RGD1308918   | PREDICTED: Rattus norvegicus similar to KIAA0157 gene product is novel. (predicted) (LOC293570)_ mRNA [XM_219441]                                                                    | 0.31 | 0.00001 |
| A 44_P503835 | RGD1563190   | PREDICTED: Rattus norvegicus similar to hypothetical protein 4933430J11 (LOC364513)_ mRNA [XM_344485]                                                                                | 0.31 | 0.00007 |
| A 44_P618288 | AW916327     | AW916327 EST347735 Rat gene index_ normalized rat_ norvegicus_ Bento Soares Rattus norvegicus cDNA clone RGIDQ04 5' end_ mRNA sequence [AW916327]                                    | 0.31 | 0.00067 |
| A 44_P625026 | BC099180     | Rattus norvegicus cDNA clone IMAGE:7383120_ containing frame-shift errors [BC099180]                                                                                                 | 0.31 | 0.00139 |
| A 44_P470430 | FAP          | Rattus norvegicus fibroblast activation protein (Fap)_ mRNA [NM_138850]                                                                                                              | 0.31 | 0.00332 |
| A 44_P169313 | BE105548     | BE105548 UI-R-BX0-ash-b-02-0-UI.s1 UI-R-BX0 Rattus norvegicus cDNA clone UI-R-BX0-ash-b-02-0-UI 3'_ mRNA sequence [BE105548]                                                         | 0.31 | 0.00467 |
| A 44_P447023 | AA850922     | AA850922 EST193690 Normalized rat ovary_ Bento Soares Rattus sp. cDNA clone ROVAO46 3' end_ mRNA sequence [AA850922]                                                                 | 0.31 | 0.00499 |
| A 44_P967240 | A 44_P967240 | Unknown                                                                                                                                                                              | 0.3  | 0.00003 |
| A 44_P235241 | AI029054     | AI029054 UI-R-C0-ik-g-04-0-UI.s1 UI-R-C0 Rattus norvegicus cDNA clone UI-R-C0-ik-g-04-0-UI 3'_ mRNA sequence [AI029054]                                                              | 0.3  | 0.00043 |



|               |                |                                                                                                                                                   |      |         |
|---------------|----------------|---------------------------------------------------------------------------------------------------------------------------------------------------|------|---------|
| A_44_P661747  | A_44_P661747   | Unknown                                                                                                                                           | 0.3  | 0.00046 |
| A_44_P533098  | AA943808       | AA943808 EST199307 Normalized rat brain_ Bento Soares Rattus sp. cDNA clone RBRAP93 3' end_ mRNA sequence [AA943808]                              | 0.3  | 0.00050 |
| A_44_P406654  | CB718784       | AMGNNUC:SRVC1-001117-A4-A srvc1 (10901) Rattus norvegicus cDNA clone srvc1-001117-a4 5' mRNA sequence [CB718784]                                  | 0.3  | 0.00066 |
| A_42_P815372  | SNRPB2         | PREDICTED: Rattus norvegicus U2 small nuclear ribonucleoprotein B (predicted) (Snrpb2_predicted)_ mRNA [XM_342528]                                | 0.3  | 0.00069 |
| A_44_P411912  | CEACAM10       | Rattus norvegicus CEA-related cell adhesion molecule 10 (Ceacam10)_ mRNA [NM_173339]                                                              | 0.3  | 0.00075 |
| A_43_P12832   | NOL3           | Rattus norvegicus nucleolar protein 3 (apoptosis repressor with CARD domain) (Nol3)_ mRNA [NM_053516]                                             | 0.3  | 0.00082 |
| A_44_P218059  | RGD1562864     | PREDICTED: Rattus norvegicus similar to protocadherin X long isoform (LOC317204)_ mRNA [XM_228479]                                                | 0.3  | 0.00091 |
| A_44_P345102  | NM_001037767   | Rattus norvegicus actin related protein 2/3 complex_ subunit 5-like (Arpc5l)_ mRNA [NM_001037767]                                                 | 0.3  | 0.00120 |
| A_44_P484793  | BC061751       | Rattus norvegicus androgen receptor-related apoptosis-associated protein CBL27_ mRNA (cDNA clone IMAGE:5600134)_ complete cds. [BC061751]         | 0.3  | 0.00148 |
| A_44_P332515  | OLR1523        | Rattus norvegicus olfactory receptor 1523 (Olr1523)_ mRNA [NM_001000713]                                                                          | 0.3  | 0.00322 |
| A_44_P670516  | TC528228       | Unknown                                                                                                                                           | 0.3  | 0.00369 |
| A_44_P130880  | USP53          | PREDICTED: Rattus norvegicus ubiquitin specific protease 53 (predicted) (Usp53_predicted)_ mRNA [XM_215700]                                       | 0.3  | 0.00426 |
| A_42_P515405  | LER3           | Rattus norvegicus immediate early response 3 (Ler3)_ mRNA [NM_212505]                                                                             | 0.3  | 0.00467 |
| A_44_P791322  | TC541451       | Q7TQ12 (Q7TQ12) Aa1114_ partial (10%) [TC541451]                                                                                                  | 0.29 | 0.00001 |
| A_44_P193372  | AI176320       | AI176320 EST219903 Normalized rat ovary_ Bento Soares Rattus sp. cDNA clone ROVBQ06 3' end_ mRNA sequence [AI176320]                              | 0.29 | 0.00004 |
| A_44_P124294  | ORC2L          | Rattus norvegicus origin recognition complex_ subunit 2-like (S. cerevisiae) (Orc2l)_ mRNA [NM_001012003]                                         | 0.29 | 0.00008 |
| A_42_P592144  | FATH           | Rattus norvegicus fat tumor suppressor homolog (Drosophila) (Fath)_ mRNA [NM_031819]                                                              | 0.29 | 0.00029 |
| A_43_P19712   | GPR65          | PREDICTED: Rattus norvegicus G-protein coupled receptor 65 (predicted) (Gpr65_predicted)_ mRNA [XM_234367]                                        | 0.29 | 0.00035 |
| A_44_P731625  | TC527629       | Unknown                                                                                                                                           | 0.29 | 0.00051 |
| A_44_P621304  | A_44_P621304   | Unknown                                                                                                                                           | 0.29 | 0.00114 |
| A_44_P267106  | RGD1564883     | PREDICTED: Rattus norvegicus similar to 60S ribosomal protein L12 (LOC312363)_ mRNA [XM_231785]                                                   | 0.29 | 0.00165 |
| A_42_P471271  | PTPN6          | Rattus norvegicus protein tyrosine phosphatase_ non-receptor type 6 (Ptpn6)_ mRNA [NM_053908]                                                     | 0.29 | 0.00184 |
| A_44_P320754  | OLR37          | Rattus norvegicus olfactory receptor 37 (Olr37)_ mRNA [NM_001000504]                                                                              | 0.29 | 0.00227 |
| A_44_P1011129 | CSNK2A2        | PREDICTED: Rattus norvegicus casein kinase II_ alpha 2_ polypeptide (predicted) (Csnk2a2_predicted)_ mRNA [XM_226237]                             | 0.29 | 0.00352 |
| A_44_P487504  | RGD1564207     | PREDICTED: Rattus norvegicus similar to SET domain-containing protein (LOC310436)_ mRNA [XM_227169]                                               | 0.29 | 0.00426 |
| A_44_P574311  | AW921380       | AW921380 EST352684 Rat gene index_ normalized rat_ norvegicus_ Bento Soares Rattus norvegicus cDNA clone RGIHT23 5' end_ mRNA sequence [AW921380] | 0.28 | 0.00001 |
| A_44_P134584  | ARHGDI1A       | Rattus norvegicus Rho GDP dissociation inhibitor (GDI) alpha (Arhgdia)_ mRNA [NM_001007005]                                                       | 0.28 | 0.00016 |
| A_44_P342923  | BG377463       | BG377463 UI-R-CU0-bvd-a-05-0-UI.s1 UI-R-CU0 Rattus norvegicus cDNA clone UI-R-CU0-bvd-a-05-0-UI 3' mRNA sequence [BG377463]                       | 0.28 | 0.00054 |
| A_43_P16715   | NM_001024903   | Rattus norvegicus SERTA domain containing 2 (Sertad2)_ mRNA [NM_001024903]                                                                        | 0.28 | 0.00066 |
| A_44_P1053706 | PEACHY         | Rattus norvegicus Saccharomyces cerevisiae Nip7p homolog (pEachy)_ mRNA [NM_138847]                                                               | 0.28 | 0.00067 |
| A_43_P11048   | AI102821       | AI102821 EST212110 Normalized rat embryo_ Bento Soares Rattus sp. cDNA clone REMBT30 3' end_ mRNA sequence [AI102821]                             | 0.28 | 0.00077 |
| A_44_P163053  | BQ210099       | BQ210099 UI-R-EP0-cod-d-09-0-UI.s1 UI-R-EP0 Rattus norvegicus cDNA clone UI-R-EP0-cod-d-09-0-UI 3' mRNA sequence [BQ210099]                       | 0.28 | 0.00106 |
| A_44_P839432  | TC561019       | Unknown                                                                                                                                           | 0.28 | 0.00115 |
| A_44_P100365  | SCN2A1         | Rattus norvegicus sodium channel_ voltage-gated_ type 2_ alpha 1 polypeptide (Scn2a1)_ mRNA [NM_012647]                                           | 0.28 | 0.00122 |
| A_44_P700588  | TC542097       | Unknown                                                                                                                                           | 0.28 | 0.00143 |
| A_44_P944757  | HNRPA1         | Rattus norvegicus heterogeneous nuclear ribonucleoprotein A1 (Hnrpa1)_ mRNA [NM_017248]                                                           | 0.28 | 0.00143 |
| A_44_P180080  | MAP1LC3B       | Rattus norvegicus microtubule-associated proteins 1A/1B light chain 3 (Map1lc3b)_ mRNA [NM_022867]                                                | 0.28 | 0.00147 |
| A_44_P999845  | SH3KBP1        | Rattus norvegicus SH3-domain kinase binding protein 1 (Sh3kbp1)_ mRNA [NM_053360]                                                                 | 0.28 | 0.00149 |
| A_42_P694105  | XM_341439      | Rattus norvegicus similar to cDNA sequence BC035537 (LOC361154)_ mRNA [XM_341439]                                                                 | 0.28 | 0.00159 |
| A_44_P315085  | AI145706       | AI145706 UI-R-BT0-qd-e-05-0-UI.s1 UI-R-BT0 Rattus norvegicus cDNA clone UI-R-BT0-qd-e-05-0-UI 3' mRNA sequence [AI145706]                         | 0.28 | 0.00181 |
| A_43_P15263   | GRM1           | Rattus norvegicus glutamate receptor_ metabotropic 1 (Grm1)_ mRNA [NM_017011]                                                                     | 0.28 | 0.00251 |
| A_44_P1008738 | AI137483       | AI137483 UI-R-C2p-ol-f-12-0-UI.s1 UI-R-C2p Rattus norvegicus cDNA clone UI-R-C2p-ol-f-12-0-UI 3' mRNA sequence [AI137483]                         | 0.28 | 0.00372 |
| A_44_P318861  | ENSRNOT0000003 | Q86WZ4 (Q86WZ4) WDFY4 protein (Fragment)_ partial (10%) [TC541950]                                                                                | 0.28 | 0.00406 |

|               |                              |                                                                                                                                                                 |      |         |
|---------------|------------------------------|-----------------------------------------------------------------------------------------------------------------------------------------------------------------|------|---------|
| A_44_P609110  | <a href="#">TC530718</a>     | Unknown                                                                                                                                                         | 0.27 | 0.0004  |
| A_43_P10933   | <a href="#">XM_576251</a>    | PREDICTED: Rattus norvegicus similar to RIKEN cDNA 3110006P09 (LOC500855)_ mRNA [XM_576251]                                                                     | 0.27 | 0.00023 |
| A_44_P638239  | <a href="#">TC523444</a>     | Unknown                                                                                                                                                         | 0.27 | 0.00028 |
| A_44_P306238  | <a href="#">BF287427</a>     | BF287427 EST452018 Rat Gene Index_ normalized rat_ Rattus norvegicus cDNA Rattus norvegicus cDNA clone RGIGG07_ mRNA sequence [BF287427]                        | 0.27 | 0.00048 |
| A_44_P160876  | <a href="#">RAP2A</a>        | Rattus norvegicus RAS related protein 2a? (Rap2a)_ mRNA [NM_053741]                                                                                             | 0.27 | 0.00060 |
| A_44_P252362  | <a href="#">BG666431</a>     | BG666431 DRACPF04 Rat DRG Library Rattus norvegicus cDNA clone DRACPF04 5'_ mRNA sequence [BG666431]                                                            | 0.27 | 0.00062 |
| A_44_P515197  | <a href="#">CXCL2</a>        | Rattus norvegicus chemokine (C-X-C motif) ligand 2 (Cxcl2)_ mRNA [NM_053647]                                                                                    | 0.27 | 0.00085 |
| A_44_P168674  | <a href="#">LOC296402</a>    | PREDICTED: Rattus norvegicus similar to Docking protein 5 (Downstream of tyrosine kinase 5) (Protein dok-5) (LOC296402)_ mRNA [XM_215954]                       | 0.27 | 0.00124 |
| A_44_P360650  | <a href="#">OLR1058</a>      | Rattus norvegicus olfactory receptor 1058 (predicted) (Olr1058_predicted)_ mRNA [NM_001000066]                                                                  | 0.27 | 0.00140 |
| A_44_P182386  | <a href="#">AY383674</a>     | Rattus norvegicus LRRGT00019 mRNA_ complete cds. [AY383674]                                                                                                     | 0.27 | 0.00164 |
| A_43_P14764   | <a href="#">NRXN1</a>        | Rattus norvegicus neurexin 1 (Nrxn1)_ mRNA [NM_021767]                                                                                                          | 0.27 | 0.00193 |
| A_43_P10893   | <a href="#">BG668719</a>     | BG668719 DRNBWC10 Rat DRG Library Rattus norvegicus cDNA clone DRNBWC10 5'_ mRNA sequence [BG668719]                                                            | 0.27 | 0.00217 |
| A_44_P886000  | <a href="#">TC527964</a>     | Q9D614 (Q9D614) Mus musculus 0 day neonate head cDNA_ RIKEN full-length enriched library_ clone:4833418L03 product:SYNTAXIN 17 homolog_ partial (6%) [TC527964] | 0.27 | 0.00234 |
| A_44_P115953  | <a href="#">AA956850</a>     | AA956850 UI-R-E1-fo-c-01-0-UI.s1 UI-R-E1 Rattus norvegicus cDNA clone UI-R-E1-fo-c-01-0-UI 3'_ mRNA sequence [AA956850]                                         | 0.27 | 0.00342 |
| A_43_P13117   | <a href="#">LCP2</a>         | Rattus norvegicus lymphocyte cytosolic protein 2 (Lcp2)_ mRNA [NM_130421]                                                                                       | 0.27 | 0.00441 |
| A_44_P296230  | <a href="#">AI175989</a>     | AI175989 EST219565 Normalized rat ovary_ Bento Soares Rattus sp. cDNA clone ROVBJ10 3' end_ mRNA sequence [AI175989]                                            | 0.27 | 0.00467 |
| A_44_P547133  | <a href="#">LEPROT</a>       | Rattus norvegicus leptin receptor overlapping transcript (Leprot)_ mRNA [NM_020099]                                                                             | 0.27 | 0.00500 |
| A_44_P282063  | <a href="#">AI176714</a>     | AI176714 EST220307 Normalized rat ovary_ Bento Soares Rattus sp. cDNA clone ROVBV84 3' end_ mRNA sequence [AI176714]                                            | 0.26 | 0.00003 |
| A_44_P856349  | <a href="#">CB607128</a>     | AMGNNUC.NRH5-00458-G11-A W Rat hypothalamus (10471) Rattus norvegicus cDNA clone nrhy5-00458-g11 5'_ mRNA sequence [CB607128]                                   | 0.26 | 0.00005 |
| A_43_P19738   | <a href="#">RGD1560908</a>   | PREDICTED: Rattus norvegicus similar to Clast4 protein (LOC305468)_ mRNA [XM_223589]                                                                            | 0.26 | 0.00040 |
| A_42_P689013  | <a href="#">TXN1</a>         | Rattus norvegicus thioredoxin 1 (Txn1)_ mRNA [NM_053800]                                                                                                        | 0.26 | 0.00049 |
| A_44_P437654  | <a href="#">AI406616</a>     | AI406616 EST234903 Normalized rat brain_ Bento Soares Rattus sp. cDNA clone RBRDP41 3' end_ mRNA sequence [AI406616]                                            | 0.26 | 0.00056 |
| A_44_P283941  | <a href="#">ARHGDI8</a>      | Rattus norvegicus Rho_ GDP dissociation inhibitor (GDI) beta (Arhgdib)_ mRNA [NM_001009600]                                                                     | 0.26 | 0.00060 |
| A_44_P255254  | <a href="#">YWHA8</a>        | Rattus norvegicus tyrosine 3-monooxygenase/tryptophan 5-monooxygenase activation protein_ beta polypeptide (Ywhab)_ mRNA [NM_019377]                            | 0.26 | 0.00070 |
| A_44_P1047331 | <a href="#">RGD1308877</a>   | PREDICTED: Rattus norvegicus similar to CGI-09 protein (predicted) (LOC311441)_ mRNA [XM_230548]                                                                | 0.26 | 0.00084 |
| A_44_P497067  | <a href="#">SUSD1</a>        | PREDICTED: Rattus norvegicus sushi domain containing 1 (predicted) (Susd1_predicted)_ mRNA [XM_232941]                                                          | 0.26 | 0.00096 |
| A_44_P173622  | <a href="#">NM_001013966</a> | Rattus norvegicus similar to hypothetical protein FLJ20546 (LOC303067)_ mRNA [NM_001013966]                                                                     | 0.26 | 0.00096 |
| A_44_P517576  | <a href="#">SEL1H</a>        | Rattus norvegicus Sel1 (suppressor of lin-12) 1 homolog (C. elegans) (Sel1h)_ mRNA [NM_177933]                                                                  | 0.26 | 0.00295 |
| A_43_P22791   | <a href="#">RGD1564527</a>   | PREDICTED: Rattus norvegicus similar to patched domain containing 1 (LOC317517)_ mRNA [XM_228985]                                                               | 0.26 | 0.00339 |
| A_44_P160733  | <a href="#">BE108178</a>     | BE108178 UI-R-BS1-ayw-g-07-0-UI.s1 UI-R-BS1 Rattus norvegicus cDNA clone UI-R-BS1-ayw-g-07-0-UI 3'_ mRNA sequence [BE108178]                                    | 0.26 | 0.00404 |
| A_44_P292689  | <a href="#">SYT1</a>         | Rattus norvegicus partial mRNA for synaptotagmin 1 (syt1 gene)_ splice variant 4. [AJ617619]                                                                    | 0.26 | 0.00407 |
| A_44_P237642  | <a href="#">BF413313</a>     | BF413313 UI-R-BT1-bnw-d-07-0-UI.s1 UI-R-BT1 Rattus norvegicus cDNA clone UI-R-BT1-bnw-d-07-0-UI 3'_ mRNA sequence [BF413313]                                    | 0.26 | 0.00499 |
| A_44_P478939  | <a href="#">AA859351</a>     | AA859351 UI-R-E0-cl-c-02-0-UI.s1 UI-R-E0 Rattus norvegicus cDNA clone UI-R-E0-cl-c-02-0-UI 3' similar to gb [AA859351]                                          | 0.25 | 0.00010 |
| A_44_P259979  | <a href="#">JAK1</a>         | PREDICTED: Rattus norvegicus Janus kinase 1 (Jak1)_ mRNA [XM_342872]                                                                                            | 0.25 | 0.00021 |
| A_44_P296431  | <a href="#">AI236053</a>     | AI236053 EST232615 Normalized rat ovary_ Bento Soares Rattus sp. cDNA clone ROVDA74 3' end_ mRNA sequence [AI236053]                                            | 0.25 | 0.00023 |
| A_44_P398663  | <a href="#">A_44_P398663</a> | Unknown                                                                                                                                                         | 0.25 | 0.00027 |
| A_44_P425481  | <a href="#">CA505835</a>     | UI-R-FJ0-cpz-1-21-0-UI.s1 UI-R-FJ0 Rattus norvegicus cDNA clone UI-R-FJ0-cpz-1-21-0-UI 3'_ mRNA sequence [CA505835]                                             | 0.25 | 0.00031 |
| A_44_P271650  | <a href="#">RAB31</a>        | Rattus norvegicus RAB31_ member RAS oncogene family (Rab31)_ mRNA [NM_145094]                                                                                   | 0.25 | 0.00057 |
| A_44_P254130  | <a href="#">AA875032</a>     | AA875032 UI-R-E0-cb-h-09-0-UI.s1 UI-R-E0 Rattus norvegicus cDNA clone UI-R-E0-cb-h-09-0-UI 3' similar to gi [AA875032]                                          | 0.25 | 0.00071 |
| A_44_P183252  | <a href="#">BF556117</a>     | BF556117 UI-R-A1-eg-f-06-0-UI.r1 UI-R-A1 Rattus norvegicus cDNA clone UI-R-A1-eg-f-06-0-UI 5'_ mRNA sequence [BF556117]                                         | 0.25 | 0.00111 |
| A_44_P306368  | <a href="#">LIP1</a>         | Rattus norvegicus lysosomal acid lipase 1 (Lip1)_ mRNA [NM_012732]                                                                                              | 0.25 | 0.00113 |
| A_44_P1014241 | <a href="#">RAMP1</a>        | Rattus norvegicus receptor (calcitonin) activity modifying protein 1 (Ramp1)_ mRNA [NM_031645]                                                                  | 0.25 | 0.00120 |
| A_44_P470013  | <a href="#">BQ210134</a>     | BQ210134 UI-R-EPO-cod-l-07-0-UI.s1 UI-R-EPO Rattus norvegicus cDNA clone UI-R-EPO-cod-l-07-0-UI 3'_ mRNA sequence [BQ210134]                                    | 0.25 | 0.00155 |

|               |                              |                                                                                                                                                                                            |      |         |
|---------------|------------------------------|--------------------------------------------------------------------------------------------------------------------------------------------------------------------------------------------|------|---------|
| A 44_P380329  | <a href="#">XM_577075</a>    | PREDICTED: Rattus norvegicus similar to 40S ribosomal protein S20 (LOC501678)_ mRNA [XM_577075]                                                                                            | 0.25 | 0.00164 |
| A 43_P21814   | <a href="#">BI395660</a>     | B1395660 EST531531 Rat gene index_ normalized rat_ norvegicus Rattus norvegicus cDNA clone RGI9T90 5' end_ mRNA sequence [BI395660]                                                        | 0.25 | 0.00204 |
| A 44_P292995  | <a href="#">RNF29</a>        | Rattus norvegicus ring finger protein 29 (Rnf29)_ mRNA [NM_001012218]                                                                                                                      | 0.25 | 0.00238 |
| A 44_P518311  | <a href="#">RBPSUH</a>       | PREDICTED: Rattus norvegicus recombining binding protein suppressor of hairless (Drosophila) (predicted) (Rbpsuh_predicted)_ mRNA [XM_232595]                                              | 0.25 | 0.00289 |
| A 44_P905278  | <a href="#">XM_573164</a>    | PREDICTED: Rattus norvegicus similar to 2700008B19Rik protein (LOC497972)_ mRNA [XM_573164]                                                                                                | 0.25 | 0.00315 |
| A 44_P404591  | <a href="#">HOD</a>          | Rattus norvegicus homeobox only domain (Hod)_ mRNA [NM_133621]                                                                                                                             | 0.25 | 0.00329 |
| A 44_P130898  | <a href="#">LY86</a>         | PREDICTED: Rattus norvegicus lymphocyte antigen 86 (predicted) (Ly86_predicted)_ mRNA [XM_225636]                                                                                          | 0.25 | 0.00420 |
| A 43_P13367   | <a href="#">RNH1</a>         | Rattus norvegicus ribonuclease/angiogenin inhibitor 1 (Rnh1)_ mRNA [NM_139105]                                                                                                             | 0.25 | 0.00436 |
| A 44_P694661  | <a href="#">BF418026</a>     | UI-R-CA1-blv-b-06-0-UI.s1 UI-R-CA1 Rattus norvegicus cDNA clone UI-R-CA1-blv-b-06-0-UI 3' mRNA sequence [BF418026]                                                                         | 0.25 | 0.00477 |
| A 44_P506363  | <a href="#">NM_001013203</a> | Rattus norvegicus tripartite motif-containing 44 (Trim44)_ mRNA [NM_001013203]                                                                                                             | 0.25 | 0.00491 |
| A 44_P1025790 | <a href="#">GSTO1</a>        | Rattus norvegicus glutathione S-transferase omega 1 (Gsto1)_ mRNA [NM_001007602]                                                                                                           | 0.24 | 0.00004 |
| A 43_P14483   | <a href="#">G10</a>          | Rattus norvegicus maternal G10 transcript (G10)_ mRNA [NM_053556]                                                                                                                          | 0.24 | 0.00013 |
| A 44_P1003969 | <a href="#">BF289772</a>     | BF289772 EST454363 Rat Gene Index_ normalized rat_ Rattus norvegicus cDNA Rattus norvegicus cDNA clone RGIHK84_ mRNA sequence [BF289772]                                                   | 0.24 | 0.00035 |
| A 44_P791184  | <a href="#">XM_576381</a>    | PREDICTED: Rattus norvegicus similar to Heterogeneous nuclear ribonucleoprotein A1 (Helix-destabilizing protein) (Single-strand binding protein) (hnRNP core protein A1) (HDP-1) (Topoisom | 0.24 | 0.00045 |
| A 44_P431296  | <a href="#">GPR18</a>        | Rattus norvegicus similar to G protein-coupled receptor 18 (LOC306191)_ mRNA [XM_224542]                                                                                                   | 0.24 | 0.00070 |
| A 44_P353102  | <a href="#">AA819532</a>     | AA819532 UI-R-A0-bf-f-03-0-UI.s1 UI-R-A0 Rattus norvegicus cDNA clone UI-R-A0-bf-f-03-0-UI 3' similar to gb [AA819532]                                                                     | 0.24 | 0.00090 |
| A 44_P868920  | <a href="#">DV728362</a>     | RVL20991 Wackym-Soares normalized rat vestibular cDNA library Rattus norvegicus cDNA 5' mRNA sequence [DV728362]                                                                           | 0.24 | 0.00098 |
| A 43_P22715   | <a href="#">AY325162</a>     | Rattus norvegicus Aa2-111 mRNA_ complete cds. [AY325162]                                                                                                                                   | 0.24 | 0.00126 |
| A 44_P244495  | <a href="#">AA819664</a>     | AA819664 UI-R-A0-bh-a-06-0-UI.s1 UI-R-A0 Rattus norvegicus cDNA clone UI-R-A0-bh-a-06-0-UI 3' similar to dbj [AA819664]                                                                    | 0.24 | 0.00129 |
| A 44_P413845  | <a href="#">BI281756</a>     | BI281756 UI-R-CU0s-cbs-c-02-0-UI.s1 UI-R-CU0s Rattus norvegicus cDNA clone UI-R-CU0s-cbs-c-02-0-UI 3' mRNA sequence [BI281756]                                                             | 0.24 | 0.00145 |
| A 44_P558961  | <a href="#">CA505525</a>     | CA505525 UI-R-FS1-cqf-1-15-0-UI.s1 NCI_CGAP_FS1 Rattus norvegicus cDNA clone IMAGE:7362305 3' mRNA sequence [CA505525]                                                                     | 0.24 | 0.00147 |
| A 44_P182721  | <a href="#">RGD1562776</a>   | PREDICTED: Rattus norvegicus similar to ribosomal protein L36 (LOC289795)_ mRNA [XM_223623]                                                                                                | 0.24 | 0.00198 |
| A 44_P260655  | <a href="#">A 44_P260655</a> | Unknown                                                                                                                                                                                    | 0.24 | 0.00216 |
| A 44_P464221  | <a href="#">RGD1566373</a>   | PREDICTED: Rattus norvegicus similar to large subunit ribosomal protein L36a (LOC365560)_ mRNA [XM_345098]                                                                                 | 0.24 | 0.00249 |
| A 44_P323599  | <a href="#">RGD1561420</a>   | PREDICTED: Rattus norvegicus similar to IL-27 p28 subunit (LOC365368)_ mRNA [XM_344962]                                                                                                    | 0.24 | 0.00295 |
| A 44_P169956  | <a href="#">AI170059</a>     | AI170059 EST215975 Normalized rat lung_ Bento Soares Rattus sp. cDNA clone RLUBY32 3' end_ mRNA sequence [AI170059]                                                                        | 0.24 | 0.00309 |
| A 44_P349002  | <a href="#">E2F1</a>         | PREDICTED: Rattus norvegicus E2F transcription factor 1 (E2f1)_ mRNA [XM_230765]                                                                                                           | 0.24 | 0.00328 |
| A 43_P11759   | <a href="#">RPS26</a>        | Rattus norvegicus ribosomal protein S26 (Rps26)_ mRNA [NM_013224]                                                                                                                          | 0.24 | 0.00343 |
| A 44_P325119  | <a href="#">AW915278</a>     | AW915278 EST346582 Normalized rat embryo_ Bento Soares Rattus sp. cDNA clone RGICS50 5' end_ mRNA sequence [AW915278]                                                                      | 0.24 | 0.00350 |
| A 44_P477459  | <a href="#">AI145899</a>     | AI145899 UI-R-BT0-qg-f-02-0-UI.s1 UI-R-BT0 Rattus norvegicus cDNA clone UI-R-BT0-qg-f-02-0-UI 3' mRNA sequence [AI145899]                                                                  | 0.23 | 0.00023 |
| A 44_P375623  | <a href="#">XM_343901</a>    | Rattus norvegicus similar to RIKEN cDNA 2210407C18 (LOC363605)_ mRNA [XM_343901]                                                                                                           | 0.23 | 0.00026 |
| A 44_P905980  | <a href="#">AI178326</a>     | AI178326 EST221994 Normalized rat placenta_ Bento Soares Rattus sp. cDNA clone RPLCP10 3' end_ mRNA sequence [AI178326]                                                                    | 0.23 | 0.00032 |
| A 44_P503697  | <a href="#">LOC365226</a>    | PREDICTED: Rattus norvegicus similar to comment for location 3447-3655: BLASTX gi [XM_344878]                                                                                              | 0.23 | 0.00034 |
| A 44_P122386  | <a href="#">HSPB3</a>        | Rattus norvegicus heat shock 27kD protein family_ member 3 (Hspb3)_ mRNA [NM_031750]                                                                                                       | 0.23 | 0.00036 |
| A 44_P217774  | <a href="#">RGD1308805</a>   | Rattus norvegicus similar to cDNA sequence BC003322 (RGD1308805)_ mRNA [NM_001009698]                                                                                                      | 0.23 | 0.00037 |
| A 44_P994095  | <a href="#">NM_001034911</a> | Rattus norvegicus similar to D7Wsu128e protein (RGD1306614)_ mRNA [NM_001034911]                                                                                                           | 0.23 | 0.00045 |
| A 44_P162782  | <a href="#">BE109676</a>     | BE109676 UI-R-BJ1-avq-h-04-0-UI.s1 UI-R-BJ1 Rattus norvegicus cDNA clone UI-R-BJ1-avq-h-04-0-UI 3' mRNA sequence [BE109676]                                                                | 0.23 | 0.00048 |
| A 44_P488078  | <a href="#">CENTG2</a>       | PREDICTED: Rattus norvegicus centaurin_ gamma 2 (predicted) (Centg2_predicted)_ mRNA [XM_237381]                                                                                           | 0.23 | 0.00059 |
| A 44_P168564  | <a href="#">NM_001039609</a> | Rattus norvegicus similar to dJ1033H22.1 (KIAA0554 protein) (RGD1305386)_ mRNA [NM_001039609]                                                                                              | 0.23 | 0.00061 |
| A 43_P12778   | <a href="#">GTF2A2</a>       | Rattus norvegicus general transcription factor IIa 2 (Gtf2a2)_ mRNA [NM_053345]                                                                                                            | 0.23 | 0.00065 |
| A 44_P433771  | <a href="#">DP1</a>          | PREDICTED: Rattus norvegicus deleted in polyposis 1 (predicted) (Dp1_predicted)_ mRNA [XM_344661]                                                                                          | 0.23 | 0.00068 |
| A 44_P359426  | <a href="#">JWA</a>          | Rattus norvegicus vitamin A responsive; cytoskeleton related (Jwa)_ mRNA [NM_022682]                                                                                                       | 0.23 | 0.00099 |
| A 43_P19515   | <a href="#">NM_001014207</a> | Rattus norvegicus similar to RIKEN cDNA 4930553M18 (RGD1309627)_ mRNA [NM_001014207]                                                                                                       | 0.23 | 0.00115 |

|               |                                |                                                                                                                                                     |      |         |
|---------------|--------------------------------|-----------------------------------------------------------------------------------------------------------------------------------------------------|------|---------|
| A_44_P286123  | <a href="#">NM_001014043</a>   | Rattus norvegicus similar to RIKEN cDNA 4933405A16 (RGD1305778)_ mRNA [NM_001014043]                                                                | 0.23 | 0.00125 |
| A_44_P161746  | <a href="#">RGD1561184</a>     | PREDICTED: Rattus norvegicus hypothetical LOC363057 (LOC363057)_ mRNA [XM_347104]                                                                   | 0.23 | 0.00136 |
| A_43_P17093   | <a href="#">BF284985</a>       | BF284985 EST449576 Rat Gene Index_ normalized rat_ Rattus norvegicus cDNA Rattus norvegicus cDNA clone RGIEY35_ mRNA sequence [BF284985]            | 0.23 | 0.00165 |
| A_44_P715676  | <a href="#">TC542574</a>       | Unknown                                                                                                                                             | 0.23 | 0.00227 |
| A_44_P216143  | <a href="#">NM_001024269</a>   | Rattus norvegicus LUC7-like ( <i>S. cerevisiae</i> ) (Luc7l)_ mRNA [NM_001024269]                                                                   | 0.23 | 0.00231 |
| A_44_P261461  | <a href="#">AI010277</a>       | AI010277 EST204728 Normalized rat lung_ Bento Soares Rattus sp. cDNA clone RLBW34 3' end_ mRNA sequence [AI010277]                                  | 0.23 | 0.00240 |
| A_44_P390086  | <a href="#">RAB2</a>           | Rattus norvegicus RAB2_ member RAS oncogene family (Rab2)_ mRNA [NM_031718]                                                                         | 0.23 | 0.00245 |
| A_44_P948495  | <a href="#">TC526201</a>       | Q69566 (Q69566) U88_ partial (5%) [TC526201]                                                                                                        | 0.23 | 0.00280 |
| A_44_P363252  | <a href="#">SET</a>            | Rattus norvegicus SET translocation (predicted) (Set_predicted)_ mRNA [NM_001012504]                                                                | 0.23 | 0.00289 |
| A_44_P1070965 | <a href="#">U68491</a>         | RNU68491 Rattus norvegicus 5-hydroxytryptamine7 receptor gene_ partial cds [U68491]                                                                 | 0.23 | 0.00294 |
| A_44_P529114  | <a href="#">AA818669</a>       | AA818669 UI-R-A0-az-h-07-0-UI.s1 UI-R-A0 Rattus norvegicus cDNA clone UI-R-A0-az-h-07-0-UI 3' similar to emb [AA818669]                             | 0.23 | 0.00297 |
| A_44_P1025411 | <a href="#">XM_573710</a>      | PREDICTED: Rattus norvegicus similar to hypothetical protein FLJ20604 (LOC498451)_ mRNA [XM_573710]                                                 | 0.23 | 0.00350 |
| A_42_P796938  | <a href="#">HDAC11</a>         | PREDICTED: Rattus norvegicus histone deacetylase 11 (predicted) (Hdac11_predicted)_ mRNA [XM_238362]                                                | 0.23 | 0.00357 |
| A_44_P1021381 | <a href="#">TALDO1</a>         | Rattus norvegicus transaldolase 1 (Taldo1)_ mRNA [NM_031811]                                                                                        | 0.23 | 0.00375 |
| A_43_P19900   | <a href="#">ZFVYE1</a>         | PREDICTED: Rattus norvegicus zinc finger_ FYVE domain containing 1 (predicted) (Zfyve1_predicted)_ mRNA [XM_216762]                                 | 0.23 | 0.00375 |
| A_44_P175345  | <a href="#">POLB</a>           | Rattus norvegicus polymerase (DNA directed)_ beta (Polb)_ mRNA [NM_017141]                                                                          | 0.23 | 0.00380 |
| A_44_P210961  | <a href="#">A_44_P210961</a>   | Unknown                                                                                                                                             | 0.23 | 0.00390 |
| A_43_P19173   | <a href="#">SDCCAG1</a>        | PREDICTED: Rattus norvegicus serologically defined colon cancer antigen 1 (predicted) (Sdccag1_predicted)_ mRNA [XM_216724]                         | 0.23 | 0.00410 |
| A_44_P1045997 | <a href="#">WDR22</a>          | PREDICTED: Rattus norvegicus WD repeat domain 22 (predicted) (Wdr22_predicted)_ mRNA [XM_234345]                                                    | 0.23 | 0.00476 |
| A_42_P490305  | <a href="#">AI013671</a>       | AI013671 EST208346 Normalized rat spleen_ Bento Soares Rattus sp. cDNA clone RSPBR42 3' end_ mRNA sequence [AI013671]                               | 0.23 | 0.00479 |
| A_44_P410062  | <a href="#">LOC290503</a>      | Rattus norvegicus similar to Pyruvate kinase_M2 isozyme (LOC290503)_ mRNA [XM_224553]                                                               | 0.23 | 0.00481 |
| A_44_P478176  | <a href="#">XM_215685</a>      | Rattus norvegicus similar to hypothetical protein MGC14816 (LOC295396)_ mRNA [XM_215685]                                                            | 0.23 | 0.00488 |
| A_43_P16632   | <a href="#">EIF2S2</a>         | Rattus norvegicus eukaryotic translation initiation factor 2_ subunit 2 (beta) (Eif2s2)_ mRNA [NM_199380]                                           | 0.22 | 0.00000 |
| A_44_P117323  | <a href="#">ICT1</a>           | PREDICTED: Rattus norvegicus immature colon carcinoma transcript 1 (predicted) (Ict1_predicted)_ mRNA [XM_221110]                                   | 0.22 | 0.00002 |
| A_44_P592830  | <a href="#">A_44_P592830</a>   | Unknown                                                                                                                                             | 0.22 | 0.00010 |
| A_44_P222166  | <a href="#">CD86</a>           | Rattus norvegicus cd86 antigen (Cd86)_ mRNA [NM_020081]                                                                                             | 0.22 | 0.00040 |
| A_44_P411280  | <a href="#">AI012428</a>       | AI012428 EST206879 Normalized rat placenta_ Bento Soares Rattus sp. cDNA clone RPLAX15 3' end_ mRNA sequence [AI012428]                             | 0.22 | 0.00054 |
| A_43_P16731   | <a href="#">IFNGR2</a>         | PREDICTED: Rattus norvegicus interferon gamma receptor 2 (predicted) (Ifngr2_predicted)_ mRNA [XM_340967]                                           | 0.22 | 0.00053 |
| A_44_P652447  | <a href="#">ENSRNOT0000000</a> | Unknown                                                                                                                                             | 0.22 | 0.00055 |
| A_44_P509865  | <a href="#">BG378637</a>       | BG378637 UI-R-CV1-bvr-g-10-0-UI.s1 UI-R-CV1 Rattus norvegicus cDNA clone UI-R-CV1-bvr-g-10-0-UI 3' mRNA sequence [BG378637]                         | 0.22 | 0.00078 |
| A_44_P667509  | <a href="#">ENSRNOT0000003</a> | Unknown                                                                                                                                             | 0.22 | 0.00088 |
| A_44_P494020  | <a href="#">OLR641</a>         | Rattus norvegicus olfactory receptor 641 (predicted) (Olr641_predicted)_ mRNA [NM_001000643]                                                        | 0.22 | 0.00093 |
| A_44_P135958  | <a href="#">RPL37A</a>         | PREDICTED: Rattus norvegicus ribosomal protein L37a (predicted) (Rpl37a_predicted)_ mRNA [XM_343587]                                                | 0.22 | 0.00095 |
| A_44_P258388  | <a href="#">AA819717</a>       | AA819717 UI-R-A0-ap-f-05-0-UI.s1 UI-R-A0 Rattus norvegicus cDNA clone UI-R-A0-ap-f-05-0-UI 3' similar to gi [AA819717]                              | 0.22 | 0.00115 |
| A_44_P159191  | <a href="#">PURA</a>           | PREDICTED: Rattus norvegicus purine rich element binding protein A (predicted) (Pura_predicted)_ mRNA [XM_226016]                                   | 0.22 | 0.00141 |
| A_43_P17468   | <a href="#">SURB7</a>          | PREDICTED: Rattus norvegicus SRB7 (suppressor of RNA polymerase B) homolog ( <i>S. cerevisiae</i> ) (predicted) (Surb7_predicted)_ mRNA [XM_232531] | 0.22 | 0.00145 |
| A_44_P528510  | <a href="#">AI177507</a>       | AI177507 EST221139 Normalized rat placenta_ Bento Soares Rattus sp. cDNA clone RPLCA86 3' end_ mRNA sequence [AI177507]                             | 0.22 | 0.00166 |
| A_44_P622886  | <a href="#">TC538008</a>       | JAK2_RAT (Q62689) Tyrosine-protein kinase JAK2 (Janus kinase 2) (JAK-2)_ partial (8%) [TC538008]                                                    | 0.22 | 0.00177 |
| A_44_P180262  | <a href="#">RGD1562397</a>     | PREDICTED: Rattus norvegicus similar to ribosomal protein L30 (LOC364060)_ mRNA [XM_344178]                                                         | 0.22 | 0.00184 |
| A_44_P242712  | <a href="#">SV2B</a>           | Rattus norvegicus synaptic vesicle glycoprotein 2b (Sv2b)_ mRNA [NM_057207]                                                                         | 0.22 | 0.00200 |
| A_44_P339095  | <a href="#">BF412296</a>       | BF412296 UI-R-BT1-bnb-h-01-0-UI.s1 UI-R-BT1 Rattus norvegicus cDNA clone UI-R-BT1-bnb-h-01-0-UI 3' mRNA sequence [BF412296]                         | 0.22 | 0.00215 |
| A_43_P14014   | <a href="#">RPL27</a>          | Rattus norvegicus ribosomal protein L27 (Rpl27)_ mRNA [NM_022514]                                                                                   | 0.22 | 0.00238 |
| A_44_P423613  | <a href="#">EHD4</a>           | Rattus norvegicus EH-domain containing 4 (Ehd4)_ mRNA [NM_139324]                                                                                   | 0.22 | 0.00246 |

|               |                              |                                                                                                                                                                                            |      |         |
|---------------|------------------------------|--------------------------------------------------------------------------------------------------------------------------------------------------------------------------------------------|------|---------|
| A_44_P387188  | <a href="#">RBJ</a>          | PREDICTED: Rattus norvegicus RBJ protein (Rbj)_ mRNA [XM_233943]                                                                                                                           | 0.22 | 0.00254 |
| A_44_P334543  | <a href="#">BX883048</a>     | Rattus norvegicus chromosome 20_ major histocompatibility complex_ assembled from 40 BACs_ strain Brown Norway (BN/ssNHsd)_ RT1n haplotype; segment 7/11 [BX883048]                        | 0.22 | 0.00257 |
| A_44_P271200  | <a href="#">AI235560</a>     | AI235560 EST232122 Normalized rat ovary_ Bento Soares Rattus sp. cDNA clone ROVCT47 3' end_ mRNA sequence [AI235560]                                                                       | 0.22 | 0.00270 |
| A_44_P242591  | <a href="#">AA900531</a>     | AA900531 UI-R-E0-dl-d-11-0-UI.s1 UI-R-E0 Rattus norvegicus cDNA clone UI-R-E0-dl-d-11-0-UI 3' similar to gi [AA900531]                                                                     | 0.22 | 0.00274 |
| A_44_P241929  | <a href="#">BF549324</a>     | BF549324 UI-R-A0-aq-d-11-0-UI.r1 UI-R-A0 Rattus norvegicus cDNA clone UI-R-A0-aq-d-11-0-UI 5' mRNA sequence [BF549324]                                                                     | 0.22 | 0.00278 |
| A_43_P13091   | <a href="#">AS3MT</a>        | Rattus norvegicus arsenic (+3 oxidation state) methyltransferase (As3mt)_ mRNA [NM_080890]                                                                                                 | 0.22 | 0.00309 |
| A_44_P464027  | <a href="#">LOC309949</a>    | Rattus norvegicus similar to 60S ribosomal protein L7a (Surfeit locus protein 3) (PLA-X polypeptide) (LOC309949)_ mRNA [XM_226645]                                                         | 0.22 | 0.00348 |
| A_44_P302972  | <a href="#">AA925693</a>     | AA925693 UI-R-A1-ec-a-04-0-UI.s1 UI-R-A1 Rattus norvegicus cDNA clone UI-R-A1-ec-a-04-0-UI 3' similar to gi [AA925693]                                                                     | 0.22 | 0.00373 |
| A_44_P716208  | <a href="#">TC560272</a>     | Unknown                                                                                                                                                                                    | 0.22 | 0.00408 |
| A_44_P278843  | <a href="#">LOC301861</a>    | Rattus norvegicus similar to actin-related protein 2 (LOC301861)_ mRNA [XM_217505]                                                                                                         | 0.21 | 0.00009 |
| A_44_P905751  | <a href="#">BF564703</a>     | UI-R-BU0-amv-g-06-0-UI.r1 UI-R-BU0 Rattus norvegicus cDNA clone UI-R-BU0-amv-g-06-0-UI 5' mRNA sequence [BF564703]                                                                         | 0.21 | 0.00014 |
| A_44_P839357  | <a href="#">TC543781</a>     | Unknown                                                                                                                                                                                    | 0.21 | 0.00017 |
| A_44_P454719  | <a href="#">RGD1562952</a>   | PREDICTED: Rattus norvegicus similar to Erbb2 interacting protein isoform 2 (LOC365661)_ mRNA [XM_345147]                                                                                  | 0.21 | 0.00024 |
| A_42_P818323  | <a href="#">NM_053398</a>    | Rattus norvegicus glial cell line derived neurotrophic factor family receptor alpha 3 (Gfra3)_ mRNA [NM_053398]                                                                            | 0.21 | 0.00035 |
| A_44_P220519  | <a href="#">LRRN6A</a>       | PREDICTED: Rattus norvegicus leucine rich repeat neuronal 6A (predicted) (Lrrn6a_predicted)_ mRNA [XM_236268]                                                                              | 0.21 | 0.00044 |
| A_44_P340401  | <a href="#">RGD1565056</a>   | PREDICTED: Rattus norvegicus similar to ribosomal protein S24 (LOC315035)_ mRNA [XM_235376]                                                                                                | 0.21 | 0.00053 |
| A_44_P1051678 | <a href="#">RASAL2</a>       | PREDICTED: Rattus norvegicus RAS protein activator like 2 (predicted) (Rasal2_predicted)_ mRNA [XM_222780]                                                                                 | 0.21 | 0.00055 |
| A_44_P320799  | <a href="#">GUCY1A3</a>      | Rattus norvegicus guanylate cyclase 1_soluble_alpha 3 (Gucy1a3)_ mRNA [NM_017090]                                                                                                          | 0.21 | 0.00067 |
| A_44_P353827  | <a href="#">ARPP19</a>       | Rattus norvegicus cAMP-regulated phosphoprotein 19 (Arpp19)_ mRNA [NM_031660]                                                                                                              | 0.21 | 0.00104 |
| A_44_P1030594 | <a href="#">CEBPG</a>        | R.norvegicus c/ebp gamma mRNA. [X64403]                                                                                                                                                    | 0.21 | 0.00145 |
| A_44_P453975  | <a href="#">AI231344</a>     | AI231344 EST228032 Normalized rat embryo_ Bento Soares Rattus sp. cDNA clone REMD183 3' end_ mRNA sequence [AI231344]                                                                      | 0.21 | 0.00150 |
| A_44_P140214  | <a href="#">RGD1560069</a>   | PREDICTED: Rattus norvegicus similar to ribosomal protein L27 (LOC364450)_ mRNA [XM_344446]                                                                                                | 0.21 | 0.00165 |
| A_44_P420320  | <a href="#">BF420433</a>     | BF420433 UI-R-BJ2-bpw-d-10-0-UI.s1 UI-R-BJ2 Rattus norvegicus cDNA clone UI-R-BJ2-bpw-d-10-0-UI 3' mRNA sequence [BF420433]                                                                | 0.21 | 0.00215 |
| A_42_P790241  | <a href="#">MRPL32</a>       | PREDICTED: Rattus norvegicus mitochondrial ribosomal protein L32 (predicted) (Mrpl32_predicted)_ mRNA [XM_214491]                                                                          | 0.21 | 0.00292 |
| A_44_P468854  | <a href="#">LOC317416</a>    | Rattus norvegicus similar to dJ14O9.1 (Inter-Alpha-Trypsin Inhibitor Heavy Chain LIKE) (LOC317416)_ mRNA [XM_228862]                                                                       | 0.21 | 0.00295 |
| A_44_P222855  | <a href="#">RGD1564649</a>   | PREDICTED: Rattus norvegicus similar to 40S ribosomal protein S9 (LOC367102)_ mRNA [XM_345948]                                                                                             | 0.21 | 0.00297 |
| A_44_P312089  | <a href="#">NM_001014100</a> | Rattus norvegicus similar to lung inducible neuralized-related C3HC4 RING finger protein (LOC316326)_ mRNA [NM_001014100]                                                                  | 0.21 | 0.00306 |
| A_44_P379797  | <a href="#">XM_222771</a>    | Rattus norvegicus similar to ribosomal protein L7_cytosolic [validated] - rat (LOC304886)_ mRNA [XM_222771]                                                                                | 0.21 | 0.00339 |
| A_44_P792124  | <a href="#">TC522828</a>     | Q96AL3 (Q96AL3) EPHA4 protein_partial (32%) [TC522828]                                                                                                                                     | 0.21 | 0.00341 |
| A_44_P513602  | <a href="#">XM_578982</a>    | PREDICTED: Rattus norvegicus similar to Proteasome subunit beta type 6 precursor (Proteasome delta chain) (Macropain delta chain) (Multicatalytic endopeptidase complex delta chain) (Prot | 0.21 | 0.00450 |
| A_44_P669920  | <a href="#">TC526550</a>     | Unknown                                                                                                                                                                                    | 0.21 | 0.00454 |
| A_44_P300919  | <a href="#">LCMT2</a>        | Rattus norvegicus leucine carboxyl methyltransferase 2 (Lcmt2)_ mRNA [NM_001011956]                                                                                                        | 0.2  | 0.00006 |
| A_44_P1000383 | <a href="#">EPRS</a>         | Rattus norvegicus similar to Bifunctional aminoacyl-tRNA synthetase (LOC289352)_ mRNA [XM_213969]                                                                                          | 0.2  | 0.00052 |
| A_43_P14482   | <a href="#">IMPDH2</a>       | Rattus norvegicus inosine 5-monophosphate dehydrogenase 2 (Impdh2)_ mRNA [NM_199099]                                                                                                       | 0.2  | 0.00072 |
| A_44_P447701  | <a href="#">RGD1563969</a>   | PREDICTED: Rattus norvegicus similar to tumor protein_translationally-controlled 1 (LOC363865)_ mRNA [XM_344072]                                                                           | 0.2  | 0.00111 |
| A_44_P263105  | <a href="#">NM_001025715</a> | Rattus norvegicus similar to RIKEN cDNA 0610025L06 (RGD1309967)_ mRNA [NM_001025715]                                                                                                       | 0.2  | 0.00116 |
| A_43_P13245   | <a href="#">PABPC1</a>       | Rattus norvegicus poly(A) binding protein_cytoplasmic 1 (Pabpc1)_ mRNA [NM_134353]                                                                                                         | 0.2  | 0.00251 |
| A_44_P414345  | <a href="#">OLR559</a>       | Rattus norvegicus olfactory receptor 559 (predicted) (Olr559_predicted)_ mRNA [NM_001000668]                                                                                               | 0.2  | 0.00271 |
| A_44_P299550  | <a href="#">CLDN4</a>        | Rattus norvegicus claudin 4 (Cldn4)_ mRNA [NM_001012022]                                                                                                                                   | 0.2  | 0.00341 |
| A_44_P792446  | <a href="#">SCUBE1</a>       | PREDICTED: Rattus norvegicus signal peptide_CUB domain_EGF-like 1 (predicted) (Scube1_predicted)_ mRNA [XM_235529]                                                                         | 0.2  | 0.00360 |
| A_44_P295193  | <a href="#">RGD1307509</a>   | Rattus norvegicus similar to RIKEN cDNA 1700108L22 (LOC310348)_ mRNA [XM_227072]                                                                                                           | 0.2  | 0.00404 |
| A_42_P552143  | <a href="#">CFL1</a>         | Rattus norvegicus cofilin 1 (Cfl1)_ mRNA [NM_017147]                                                                                                                                       | 0.2  | 0.00405 |
| A_44_P288756  | <a href="#">RGD1565117</a>   | PREDICTED: Rattus norvegicus similar to 40S ribosomal protein S26 (LOC299848)_ mRNA [XM_235217]                                                                                            | 0.2  | 0.00442 |

|               |                |                                                                                                                                                   |       |         |
|---------------|----------------|---------------------------------------------------------------------------------------------------------------------------------------------------|-------|---------|
| A_43_P14852   | AW144408       | AW144408 EST294704 Normalized rat ovary_ Bento Soares Rattus sp. cDNA clone RGICR81 5' end_ mRNA sequence [AW144408]                              | 0.2   | 0.00466 |
| A_44_P149182  | CHP            | Rattus norvegicus calcium binding protein p22 (Chp)_ mRNA [NM_024139]                                                                             | -0.2  | 0.00008 |
| A_44_P804042  | AW143970       | AW143970 EST294266 Normalized rat embryo_ Bento Soares Rattus sp. cDNA clone RGICE17 5' end_ mRNA sequence [AW143970]                             | -0.2  | 0.00055 |
| A_44_P853848  | TC557865       | Unknown                                                                                                                                           | -0.2  | 0.00063 |
| A_44_P700598  | BP483652       | BP483652 Rattus norvegicus pancreatic islet Rattus norvegicus cDNA clone RBC07390 5' _ mRNA sequence [BP483652]                                   | -0.2  | 0.00087 |
| A_44_P726147  | BF555497       | BF555497 UI-R-A1-do-f-07-0-UI.r1 UI-R-A1 Rattus norvegicus cDNA clone UI-R-A1-do-f-07-0-UI 5' _ mRNA sequence [BF555497]                          | -0.2  | 0.00128 |
| A_44_P989250  | DV728275       | RVL20890 Wackym-Soares normalized rat vestibular cDNA library Rattus norvegicus cDNA 5' _ mRNA sequence [DV728275]                                | -0.2  | 0.00129 |
| A_44_P602724  | BF522056       | UI-R-Y0-aba-a-06-0-UI.r2 UI-R-Y0 Rattus norvegicus cDNA clone UI-R-Y0-aba-a-06-0-UI 5' _ mRNA sequence [BF522056]                                 | -0.2  | 0.00169 |
| A_44_P406890  | BC099158       | Rattus norvegicus cDNA clone IMAGE:7381559 [BC099158]                                                                                             | -0.2  | 0.00255 |
| A_44_P379420  | GDI1           | Rattus norvegicus guanosine diphosphate dissociation inhibitor 1 (Gdi1)_ mRNA [NM_017088]                                                         | -0.2  | 0.00454 |
| A_44_P941612  | AI556229       | AI556229 UI-R-C2p-rb-f-08-0-UI.s1 UI-R-C2p Rattus norvegicus cDNA clone UI-R-C2p-rb-f-08-0-UI 3' _ mRNA sequence [AI556229]                       | -0.21 | 0.00000 |
| A_44_P591983  | TC556497       | Unknown                                                                                                                                           | -0.21 | 0.00001 |
| A_44_P403532  | CB544382       | CB544382 AMGNNUC:NRHY4-00185-F11-A W Rat hypothalamus (10464) Rattus norvegicus cDNA clone nrhy4-00185-f11 5' _ mRNA sequence [CB544382]          | -0.21 | 0.00025 |
| A_43_P13088   | SC4MOL         | Rattus norvegicus sterol-C4-methyl oxidase-like (Sc4mol)_ mRNA [NM_080886]                                                                        | -0.21 | 0.00029 |
| A_44_P880842  | AW144265       | AW144265 EST294561 Normalized rat ovary_ Bento Soares Rattus sp. cDNA clone RGICO72 5' end_ mRNA sequence [AW144265]                              | -0.21 | 0.00029 |
| A_44_P344070  | AW917663       | AW917663 EST348967 Rat gene index_ normalized rat_ norvegicus_ Bento Soares Rattus norvegicus cDNA clone RGIEG57 5' end_ mRNA sequence [AW917663] | -0.21 | 0.00072 |
| A_44_P642722  | TC551395       | Unknown                                                                                                                                           | -0.21 | 0.00091 |
| A_44_P854346  | TC525714       | Unknown                                                                                                                                           | -0.21 | 0.00093 |
| A_44_P793873  | TC563317       | Unknown                                                                                                                                           | -0.21 | 0.00177 |
| A_43_P22785   | RGD1305413     | Rattus norvegicus similar to FLJ40243 protein (LOC361902)_ mRNA [XM_342199]                                                                       | -0.21 | 0.00186 |
| A_44_P517896  | HSD17B12       | Rattus norvegicus smooth muscle-specific 17 beta-hydroxysteroid dehydrogenase type 3 (Hsd17b12)_ mRNA [NM_032066]                                 | -0.21 | 0.00202 |
| A_44_P868092  | HSPCB          | Rattus norvegicus similar to heat shock protein 84 - mouse (LOC301252)_ mRNA [XM_217339]                                                          | -0.21 | 0.00213 |
| A_44_P105229  | NM_001013157   | Rattus norvegicus nicotinamide nucleotide transhydrogenase (mapped) (Nnt_mapped)_ mRNA [NM_001013157]                                             | -0.21 | 0.00257 |
| A_44_P220661  | A_44_P220661   | Unknown                                                                                                                                           | -0.21 | 0.00285 |
| A_44_P234636  | NM_001031639   | Rattus norvegicus proteasome (prosome_ macropain) 26S subunit_ non-ATPase_ 2 (Psm2)_ mRNA [NM_001031639]                                          | -0.21 | 0.00334 |
| A_44_P187005  | ABC9           | Rattus norvegicus ATP-binding cassette_ sub-family B (MDR/TAP)_ member 9 (Abcb9)_ mRNA [NM_022238]                                                | -0.21 | 0.00349 |
| A_44_P259119  | RGD1306148     | PREDICTED: Rattus norvegicus similar to KIAA0368 (predicted) (LOC313196)_ mRNA [XM_232937]                                                        | -0.21 | 0.00366 |
| A_42_P650709  | RGD1306954     | Rattus norvegicus similar to RIKEN cDNA 1110004E09 (RGD1306954)_ mRNA [NM_001008288]                                                              | -0.21 | 0.00387 |
| A_42_P788810  | AW918709       | AW918709 EST350013 Rat gene index_ normalized rat_ norvegicus_ Bento Soares Rattus norvegicus cDNA clone RGIEW88 5' end_ mRNA sequence [AW918709] | -0.21 | 0.00404 |
| A_44_P902933  | DV724602       | RVL16670 Wackym-Soares normalized rat vestibular cDNA library Rattus norvegicus cDNA 5' _ mRNA sequence [DV724602]                                | -0.21 | 0.00419 |
| A_44_P182739  | PDZK8          | PREDICTED: Rattus norvegicus PDZ domain containing 8 (predicted) (Pdzk8_predicted)_ mRNA [XM_217651]                                              | -0.21 | 0.00434 |
| A_44_P233080  | EGR1           | Rattus norvegicus early growth response 1 (Egr1)_ mRNA [NM_012551]                                                                                | -0.22 | 0.00007 |
| A_44_P824666  | TC526534       | Unknown                                                                                                                                           | -0.22 | 0.00009 |
| A_44_P219839  | TPM3           | Rattus norvegicus tropomyosin 3_ gamma (Tpm3)_ transcript variant 1_ mRNA [NM_057208]                                                             | -0.22 | 0.00014 |
| A_44_P204758  | SULT4A1        | Rattus norvegicus sulfotransferase family 4A_ member 1 (Sult4a1)_ mRNA [NM_031641]                                                                | -0.22 | 0.00017 |
| A_44_P181548  | AW915616       | AW915616 EST346920 Normalized rat embryo_ Bento Soares Rattus sp. cDNA clone RGICY43 5' end_ mRNA sequence [AW915616]                             | -0.22 | 0.00087 |
| A_44_P493911  | SLC13A5        | Rattus norvegicus solute carrier family 13 (sodium-dependent citrate transporter)_ member 5 (Slc13a5)_ mRNA [NM_170668]                           | -0.22 | 0.00095 |
| A_44_P288463  | RGD1308397     | PREDICTED: Rattus norvegicus similar to DNA segment_ Chr 3_ ERATO Doi 250_ expressed (predicted) (LOC308017)_ mRNA [XM_217691]                    | -0.22 | 0.00115 |
| A_44_P1057197 | TAF9L          | Rattus norvegicus TAF9-like RNA polymerase II_ TATA box binding protein (TBP)-associated factor_ 31kDa (Taf9l)_ mRNA [NM_133615]                  | -0.22 | 0.00119 |
| A_44_P230813  | RHOT1          | PREDICTED: Rattus norvegicus ras homolog gene family_ member T1 (predicted) (Rhot1_predicted)_ mRNA [XM_220753]                                   | -0.22 | 0.00139 |
| A_44_P807565  | TC556734       | Q96285 (Q96285) Receptor-like kinase LECRK1 (Serine/threonine-specific kinase lecRK1_ lectin receptor-like) _ partial (4%) [TC556734]             | -0.22 | 0.00168 |
| A_44_P621723  | ENSRNOT0000002 | Unknown                                                                                                                                           | -0.22 | 0.00215 |
| A_43_P10901   | ITM2C          | Rattus norvegicus integral membrane protein 2C (Itm2c)_ mRNA [NM_001009674]                                                                       | -0.22 | 0.00290 |

|               |                              |                                                                                                                                                                      |       |         |
|---------------|------------------------------|----------------------------------------------------------------------------------------------------------------------------------------------------------------------|-------|---------|
| A_44_P743576  | <a href="#">AW917533</a>     | AW917533 EST348837 Rat gene index_ normalized rat_ norvegicus_ Bento Soares Rattus norvegicus cDNA clone RGIEF01 5' end_ mRNA sequence [AW917533]                    | -0.22 | 0.00316 |
| A_44_P165986  | <a href="#">KLK7</a>         | PREDICTED: Rattus norvegicus kallikrein 7 (chymotryptic_stratum corneum) (predicted) (Klk7_predicted)_ mRNA [XM_218649]                                              | -0.22 | 0.00322 |
| A_43_P13834   | <a href="#">BQ782575</a>     | BQ782575 UI-R-FF0-cpk-j-07-0-UI.s1 NCI_CGAP_FF0 Rattus norvegicus cDNA clone UI-R-FF0-cpk-j-07-0-UI 3' _mRNA sequence [BQ782575]                                     | -0.22 | 0.00369 |
| A_44_P400377  | <a href="#">PHTF1</a>        | PREDICTED: Rattus norvegicus putative homeodomain transcription factor 1 (Phtf1)_ mRNA [XM_342306]                                                                   | -0.22 | 0.00376 |
| A_44_P222924  | <a href="#">RGD1565696</a>   | PREDICTED: Rattus norvegicus hypothetical LOC363240 (LOC363240)_ mRNA [XM_347115]                                                                                    | -0.22 | 0.00416 |
| A_44_P1052467 | <a href="#">GOSR2</a>        | Rattus norvegicus golgi SNAP receptor complex member 2 (Gosr2)_ mRNA [NM_031685]                                                                                     | -0.23 | 0.00003 |
| A_42_P647500  | <a href="#">KIF3A</a>        | Rattus norvegicus kinesin-like protein KIF3A mRNA_ partial cds. [AF155825]                                                                                           | -0.23 | 0.00008 |
| A_44_P290424  | <a href="#">SIAH1A</a>       | Rattus norvegicus seven in absentia 1A (Siah1a)_ mRNA [NM_080905]                                                                                                    | -0.23 | 0.00037 |
| A_44_P808443  | <a href="#">TC559468</a>     | KTHY_MYCGA (Q7NAD7) Thymidylate kinase (dTMP kinase) _ partial (8%) [TC559468]                                                                                       | -0.23 | 0.00038 |
| A_44_P472674  | <a href="#">AW143016</a>     | AW143016 EST293311 Normalized rat brain_ Bento Soares Rattus sp. cDNA clone RGIBB65 5' end_ mRNA sequence [AW143016]                                                 | -0.23 | 0.00075 |
| A_44_P183784  | <a href="#">AKAP12</a>       | Rattus norvegicus A kinase (PRKA) anchor protein (gravin) 12 (Akap12)_ transcript variant 1_ mRNA [NM_057103]                                                        | -0.23 | 0.00097 |
| A_44_P712107  | <a href="#">BF285946</a>     | BF285946 EST450537 Rat Gene Index_ normalized rat_ Rattus norvegicus cDNA Rattus norvegicus cDNA clone RGIFL24_ mRNA sequence [BF285946]                             | -0.23 | 0.00123 |
| A_44_P905308  | <a href="#">TC526720</a>     | Unknown                                                                                                                                                              | -0.23 | 0.00124 |
| A_44_P734941  | <a href="#">TC533521</a>     | Q7VGL1 (Q7VGL1) Methyl-accepting chemotaxis protein_ partial (4%) [TC533521]                                                                                         | -0.23 | 0.00128 |
| A_44_P776335  | <a href="#">DY309796</a>     | AGENCOURT_66956942 NIH_MGC_366 Rattus norvegicus cDNA clone IMAGE:8366825 5' _mRNA sequence [DY309796]                                                               | -0.23 | 0.00233 |
| A_44_P311078  | <a href="#">RGD1565619</a>   | PREDICTED: Rattus norvegicus similar to hypothetical protein FLJ36090 (LOC307302)_ mRNA [XM_225760]                                                                  | -0.23 | 0.00239 |
| A_44_P116130  | <a href="#">HSPCB</a>        | Rattus norvegicus heat shock 90kDa protein 1_ beta (Hspcb)_ mRNA [NM_001004082]                                                                                      | -0.23 | 0.00269 |
| A_44_P807394  | <a href="#">TC555986</a>     | Unknown                                                                                                                                                              | -0.23 | 0.00295 |
| A_44_P109907  | <a href="#">A_44_P109907</a> | Unknown                                                                                                                                                              | -0.23 | 0.00296 |
| A_44_P386543  | <a href="#">RGD1311196</a>   | PREDICTED: Rattus norvegicus similar to hypothetical protein (predicted) (RGD1311196_predicted)_ mRNA [XM_227438]                                                    | -0.23 | 0.00298 |
| A_44_P808142  | <a href="#">TC525053</a>     | Unknown                                                                                                                                                              | -0.23 | 0.00299 |
| A_44_P415230  | <a href="#">RGD1566174</a>   | PREDICTED: Rattus norvegicus similar to novel protein (LOC303167)_ mRNA [XM_220473]                                                                                  | -0.23 | 0.00307 |
| A_44_P169472  | <a href="#">AB033702</a>     | Rattus rattus mitochondrial cytb gene for cytochrome b_ partial cds [AB033702]                                                                                       | -0.23 | 0.00325 |
| A_44_P515048  | <a href="#">AW140632</a>     | AW140632 EST290623 Normalized rat embryo_ Bento Soares Rattus sp. cDNA clone RGIAN45 5' end similar to ATP-dependent metalloprotease FtsH1_ mRNA sequence [AW140632] | -0.23 | 0.00355 |
| A_44_P211069  | <a href="#">RGD1306119</a>   | PREDICTED: Rattus norvegicus similar to transcriptional regulating protein 132 (predicted) (LOC314306)_ mRNA [XM_234404]                                             | -0.23 | 0.00359 |
| A_44_P762543  | <a href="#">TC525657</a>     | Unknown                                                                                                                                                              | -0.23 | 0.00393 |
| A_44_P745579  | <a href="#">TC555636</a>     | Unknown                                                                                                                                                              | -0.23 | 0.00434 |
| A_44_P951025  | <a href="#">A_44_P951025</a> | Unknown                                                                                                                                                              | -0.24 | 0.00011 |
| A_42_P739079  | <a href="#">NM_001014274</a> | Rattus norvegicus similar to armadillo repeat protein ALEX2 (LOC367903)_ mRNA [NM_001014274]                                                                         | -0.24 | 0.00059 |
| A_44_P142958  | <a href="#">BF559508</a>     | BF559508 UI-R-E0-cm-g-05-0-UI.r1 UI-R-E0 Rattus norvegicus cDNA clone UI-R-E0-cm-g-05-0-UI 5' _mRNA sequence [BF559508]                                              | -0.24 | 0.00060 |
| A_44_P606549  | <a href="#">NM_001034150</a> | Rattus norvegicus signal recognition particle receptor ('docking protein') (Srpr)_ mRNA [NM_001034150]                                                               | -0.24 | 0.00097 |
| A_44_P665909  | <a href="#">AW141926</a>     | AW141926 EST292041 Normalized rat ovary_ Bento Soares Rattus sp. cDNA clone RGICP28 5' end similar to EEN-B1_ mRNA sequence [AW141926]                               | -0.24 | 0.00104 |
| A_44_P628515  | <a href="#">XM_574845</a>    | PREDICTED: Rattus norvegicus similar to RGD1309360_predicted protein (LOC499521)_ mRNA [XM_574845]                                                                   | -0.24 | 0.00118 |
| A_44_P1038593 | <a href="#">ZFP312</a>       | PREDICTED: Rattus norvegicus zinc finger protein 312 (predicted) (Zfp312_predicted)_ mRNA [XM_223820]                                                                | -0.24 | 0.00124 |
| A_44_P654444  | <a href="#">DQ268830</a>     | Rattus norvegicus neuron-derived orphan receptor 1 mRNA_ complete cds [DQ268830]                                                                                     | -0.24 | 0.00139 |
| A_44_P135450  | <a href="#">RGD1306921</a>   | PREDICTED: Rattus norvegicus similar to mKIAA1107 protein (predicted) (LOC305122)_ mRNA [XM_223143]                                                                  | -0.24 | 0.00154 |
| A_43_P11509   | <a href="#">SYP</a>          | Rattus norvegicus synaptophysin (Syp)_ mRNA [NM_012664]                                                                                                              | -0.24 | 0.00171 |
| A_44_P671449  | <a href="#">TC517114</a>     | Q6T424 (Q6T424) Tumor differentiation factor_ partial (16%) [TC517114]                                                                                               | -0.24 | 0.00251 |
| A_44_P711487  | <a href="#">BM986360</a>     | BM986360 EST531268 Rat gene index_ normalized rat_ norvegicus Rattus norvegicus cDNA clone RGIAE88 5' end similar to arginase II_ mRNA sequence [BM986360]           | -0.24 | 0.00267 |
| A_44_P882206  | <a href="#">AW917544</a>     | AW917544 EST348848 Rat gene index_ normalized rat_ norvegicus_ Bento Soares Rattus norvegicus cDNA clone RGIEF14 5' end_ mRNA sequence [AW917544]                    | -0.24 | 0.00272 |
| A_44_P396460  | <a href="#">SCAP</a>         | PREDICTED: Rattus norvegicus SREBP cleavage activating protein (predicted) (Scap_predicted)_ mRNA [XM_217279]                                                        | -0.24 | 0.00288 |
| A_44_P608365  | <a href="#">ZFP265</a>       | Rattus norvegicus zinc finger protein 265 (Zfp265)_ mRNA [NM_031616]                                                                                                 | -0.24 | 0.00309 |
| A_44_P671265  | <a href="#">TC522586</a>     | Q8K395 (Q8K395) AW413632 protein_ partial (85%) [TC522586]                                                                                                           | -0.24 | 0.00323 |

|               |                                |                                                                                                                                                      |       |         |
|---------------|--------------------------------|------------------------------------------------------------------------------------------------------------------------------------------------------|-------|---------|
| A_44_P849035  | <a href="#">BF286219</a>       | BF286219 EST450810 Rat Gene Index_ normalized rat_ Rattus norvegicus cDNA Rattus norvegicus cDNA clone RGIFN35 5' sequence_ mRNA sequence [BF286219] | -0.24 | 0.00357 |
| A_44_P282826  | <a href="#">BF558098</a>       | BF558098 UI-R-C0-hk-f-10-0-UI.r1 UI-R-C0 Rattus norvegicus cDNA clone UI-R-C0-hk-f-10-0-UI 5'_ mRNA sequence [BF558098]                              | -0.24 | 0.00384 |
| A_44_P625503  | <a href="#">NM_001039036</a>   | Rattus norvegicus GA repeat binding protein_ beta 1 (Gabpb1)_ mRNA [NM_001039036]                                                                    | -0.24 | 0.00480 |
| A_44_P749338  | <a href="#">TC562198</a>       | Unknown                                                                                                                                              | -0.25 | 0.00010 |
| A_43_P10134   | <a href="#">LOC316395</a>      | PREDICTED: Rattus norvegicus similar to ubiquitin-protein ligase NEDL2 (LOC316395)_ mRNA [XM_237139]                                                 | -0.25 | 0.00024 |
| A_43_P18356   | <a href="#">ESRRBL1</a>        | PREDICTED: Rattus norvegicus estrogen-related receptor beta like 1 (predicted) (Esrrbl1_predicted)_ mRNA [XM_221496]                                 | -0.25 | 0.00037 |
| A_43_P22484   | <a href="#">RGD1564948</a>     | PREDICTED: Rattus norvegicus similar to hypothetical protein MGC33630 (LOC304498)_ mRNA [XM_222180]                                                  | -0.25 | 0.00043 |
| A_44_P746247  | <a href="#">TC557386</a>       | Unknown                                                                                                                                              | -0.25 | 0.00051 |
| A_44_P182975  | <a href="#">RPGR</a>           | PREDICTED: Rattus norvegicus similar to X-linked retinitis pigmentosa GTPase regulator (mRpgr) (LOC367733)_ mRNA [XM_346270]                         | -0.25 | 0.00060 |
| A_42_P788087  | <a href="#">RGD1566287</a>     | PREDICTED: Rattus norvegicus similar to DXImx39e protein (LOC367743)_ mRNA [XM_346274]                                                               | -0.25 | 0.00072 |
| A_44_P674488  | <a href="#">AW142633</a>       | AW142633 EST292885 Normalized rat embryo_ Bento Soares Rattus sp. cDNA clone RGIAR17 5' end_ mRNA sequence [AW142633]                                | -0.25 | 0.00078 |
| A_44_P410341  | <a href="#">JPP</a>            | PREDICTED: Rattus norvegicus IAP promoted placental gene (predicted) (Jpp_predicted)_ mRNA [XM_233415]                                               | -0.25 | 0.00093 |
| A_44_P1029253 | <a href="#">MAS1</a>           | Rattus norvegicus MAS1 oncogene (Mas1)_ mRNA [NM_012757]                                                                                             | -0.25 | 0.00095 |
| A_44_P389670  | <a href="#">LOC360568</a>      | PREDICTED: Rattus norvegicus similar to RIKEN cDNA 2810013M15 (LOC360568)_ mRNA [XM_340844]                                                          | -0.25 | 0.00107 |
| A_44_P523016  | <a href="#">NM_001024314</a>   | Rattus norvegicus similar to Protein C20orf22 homolog (LOC499913)_ mRNA [NM_001024314]                                                               | -0.25 | 0.00160 |
| A_44_P259516  | <a href="#">STX1B2</a>         | Rattus norvegicus syntaxin 1B2 (Stx1b2)_ mRNA [NM_012700]                                                                                            | -0.25 | 0.00174 |
| A_44_P804257  | <a href="#">AW914938</a>       | AW914938 EST346242 Normalized rat ovary_ Bento Soares Rattus sp. cDNA clone RGIbM54 5' end_ mRNA sequence [AW914938]                                 | -0.25 | 0.00201 |
| A_44_P157840  | <a href="#">AI101637</a>       | AI101637 EST210926 Normalized rat brain_ Bento Soares Rattus sp. cDNA clone RBRBT22 3' end_ mRNA sequence [AI101637]                                 | -0.25 | 0.00286 |
| A_44_P130516  | <a href="#">RT1-DB1</a>        | Rattus norvegicus RT1 class II_ locus Db1 (RT1-Db1)_ mRNA [NM_001008884]                                                                             | -0.25 | 0.00378 |
| A_44_P198716  | <a href="#">PLS3</a>           | PREDICTED: Rattus norvegicus plastin 3 (T-isoform) (Pls3)_ mRNA [XM_343776]                                                                          | -0.25 | 0.00446 |
| A_44_P339558  | <a href="#">MYO5B</a>          | Rattus norvegicus myosin 5B (Myo5b)_ mRNA [NM_017083]                                                                                                | -0.25 | 0.00448 |
| A_44_P270700  | <a href="#">BG663460</a>       | BG663460 DRAAAJD01 Rat DRG Library Rattus norvegicus cDNA clone DRAAAJD01 5'_ mRNA sequence [BG663460]                                               | -0.25 | 0.00463 |
| A_42_P503281  | <a href="#">CLIC5</a>          | Rattus norvegicus chloride intracellular channel 5 (Clic5)_ mRNA [NM_053603]                                                                         | -0.26 | 0.00015 |
| A_43_P17779   | <a href="#">RGD1564042</a>     | PREDICTED: Rattus norvegicus similar to osmosis responsive factor (LOC294774)_ mRNA [XM_215493]                                                      | -0.26 | 0.00018 |
| A_44_P344273  | <a href="#">NM_001034129</a>   | Rattus norvegicus translocation protein 1 (Tloc1)_ mRNA [NM_001034129]                                                                               | -0.26 | 0.00057 |
| A_44_P699666  | <a href="#">TC520137</a>       | Unknown                                                                                                                                              | -0.26 | 0.00058 |
| A_43_P23362   | <a href="#">TTC8</a>           | PREDICTED: Rattus norvegicus tetratricopeptide repeat domain 8 (predicted) (Ttc8_predicted)_ mRNA [XM_234373]                                        | -0.26 | 0.00061 |
| A_44_P102685  | <a href="#">IL13RA2</a>        | Rattus norvegicus interleukin 13 receptor_ alpha 2 (Il13ra2)_ mRNA [NM_133538]                                                                       | -0.26 | 0.00127 |
| A_44_P180484  | <a href="#">A_44_P180484</a>   | Unknown                                                                                                                                              | -0.26 | 0.00356 |
| A_43_P15719   | <a href="#">TRA1</a>           | Rattus norvegicus tumor rejection antigen gp96 (predicted) (Tra1_predicted)_ mRNA [NM_001012197]                                                     | -0.26 | 0.00432 |
| A_42_P508471  | <a href="#">RGN</a>            | Rattus norvegicus regucalcin (Rgn)_ mRNA [NM_031546]                                                                                                 | -0.27 | 0.00072 |
| A_44_P393978  | <a href="#">NFE2L3</a>         | PREDICTED: Rattus norvegicus nuclear factor_ erythroid derived 2_ like 3 (predicted) (Nfe2l3_predicted)_ mRNA [XM_231763]                            | -0.27 | 0.00071 |
| A_44_P403139  | <a href="#">LNP</a>            | PREDICTED: Rattus norvegicus limb and neural patterns (predicted) (Lnp_predicted)_ mRNA [XM_342450]                                                  | -0.27 | 0.00104 |
| A_44_P358649  | <a href="#">ENSRNOT0000005</a> | Unknown                                                                                                                                              | -0.27 | 0.00228 |
| A_44_P587836  | <a href="#">BG666098</a>       | BG666098 DRACNH05 Rat DRG Library Rattus norvegicus cDNA clone DRACNH05 5'_ mRNA sequence [BG666098]                                                 | -0.27 | 0.00289 |
| A_44_P700056  | <a href="#">TC556993</a>       | Unknown                                                                                                                                              | -0.27 | 0.00328 |
| A_44_P976287  | <a href="#">TC537709</a>       | Q9AIG4 (Q9AIG4) Ribosomal protein L3_ partial (10%) [TC537709]                                                                                       | -0.27 | 0.00460 |
| A_44_P837538  | <a href="#">M23953</a>         | RATCARB07 Rat carboxypeptidase B gene_ exons 6_ 7_ and 8 [M23953]                                                                                    | -0.27 | 0.00467 |
| A_44_P454420  | <a href="#">RT1-S3</a>         | PREDICTED: Rattus norvegicus RT1 class Ib_ locus S3 (RT1-S3)_ mRNA [XM_215303]                                                                       | -0.28 | 0.00003 |
| A_44_P915826  | <a href="#">TC542691</a>       | Unknown                                                                                                                                              | -0.28 | 0.00004 |
| A_44_P978398  | <a href="#">TC540103</a>       | Unknown                                                                                                                                              | -0.28 | 0.00005 |
| A_43_P16774   | <a href="#">MGC95138</a>       | Rattus norvegicus similar to acetyl CoA transferase-like (MGC95138)_ mRNA [NM_001006995]                                                             | -0.28 | 0.00015 |
| A_44_P380202  | <a href="#">XM_578535</a>      | PREDICTED: Rattus norvegicus similar to WD repeat domain 35 (LOC503018)_ mRNA [XM_578535]                                                            | -0.28 | 0.00029 |



|               |                     |                                                                                                                                                 |       |         |
|---------------|---------------------|-------------------------------------------------------------------------------------------------------------------------------------------------|-------|---------|
| A_44_P55072   | <u>MGC94782</u>     | Rattus norvegicus similar to hypothetical protein MGC33926 (MGC94782)_ mRNA [NM_001004282]                                                      | -0.28 | 0.00041 |
| A_44_P791404  | <u>CX570374</u>     | RVL1525 Wackym-Soares normalized rat vestibular cDNA library Rattus norvegicus cDNA 5'_ mRNA sequence [CX570374]                                | -0.28 | 0.00045 |
| A_44_P1022637 | <u>NM_001029897</u> | Rattus norvegicus striatin_calmmodulin binding protein 3 (Strn3)_ mRNA [NM_001029897]                                                           | -0.28 | 0.00124 |
| A_44_P491831  | <u>YC2</u>          | Rattus norvegicus glutathione S-transferase Yc2 subunit (Yc2)_ mRNA [NM_001009920]                                                              | -0.28 | 0.00126 |
| A_44_P852993  | <u>TC554133</u>     | Q7CRY3 (Q7CRY3) AGR_L_3170p_partial (5%) [TC554133]                                                                                             | -0.28 | 0.00132 |
| A_43_P15490   | <u>CLSTN2</u>       | Rattus norvegicus calsynenin 2 (Clstn2)_ mRNA [NM_134377]                                                                                       | -0.28 | 0.00154 |
| A_44_P198474  | <u>BCAS1</u>        | Rattus norvegicus breast carcinoma amplified sequence 1 (Bcas1)_ mRNA [NM_145670]                                                               | -0.28 | 0.00218 |
| A_44_P900125  | <u>TC540794</u>     | Unknown                                                                                                                                         | -0.28 | 0.00407 |
| A_44_P624151  | <u>TC543922</u>     | Unknown                                                                                                                                         | -0.28 | 0.00467 |
| A_44_P884766  | <u>TC523200</u>     | Unknown                                                                                                                                         | -0.29 | 0.00000 |
| A_42_P598531  | <u>CDS1</u>         | Rattus norvegicus CDP-diacylglycerol synthase 1 (Cds1)_ mRNA [NM_031242]                                                                        | -0.29 | 0.00003 |
| A_44_P109174  | <u>BG665185</u>     | BG665185 DRABZF03 Rat DRG Library Rattus norvegicus cDNA clone DRABZF03 5'_ mRNA sequence [BG665185]                                            | -0.29 | 0.00048 |
| A_44_P437565  | <u>CYTB</u>         | AF295545 Rattus norvegicus cytochrome b mRNA_complete cds; mitochondrial gene for mitochondrial product [AF295545]                              | -0.29 | 0.00240 |
| A_44_P870183  | <u>TC525332</u>     | Unknown                                                                                                                                         | -0.29 | 0.00324 |
| A_43_P14754   | <u>AW920712</u>     | AW920712 EST352016 Rat gene index_normalized rat_norvegicus_Bento Soares Rattus norvegicus cDNA clone RGIHB38 5'_ end_ mRNA sequence [AW920712] | -0.29 | 0.00359 |
| A_44_P402445  | <u>NEFH</u>         | Rattus norvegicus neurofilament_heavy polypeptide (Nefh)_ mRNA [NM_012607]                                                                      | -0.29 | 0.00367 |
| A_44_P234663  | <u>AW920627</u>     | AW920627 EST351931 Rat gene index_normalized rat_norvegicus_Bento Soares Rattus norvegicus cDNA clone RGIHA02 5'_ end_ mRNA sequence [AW920627] | -0.3  | 0.00001 |
| A_44_P734801  | <u>TC533255</u>     | Unknown                                                                                                                                         | -0.3  | 0.00017 |
| A_44_P326198  | <u>ATP6V0D1</u>     | Rattus norvegicus ATPase_H+ transporting_V0 subunit D isoform 1 (Atp6v0d1)_ mRNA [NM_001011927]                                                 | -0.3  | 0.00097 |
| A_42_P813567  | <u>SCD2</u>         | Rattus norvegicus stearoyl-Coenzyme A desaturase 2 (Scd2)_ mRNA [NM_031841]                                                                     | -0.3  | 0.00234 |
| A_44_P412200  | <u>NP516857</u>     | cytochrome b [Rattus argentiventer] [NP516857]                                                                                                  | -0.3  | 0.00248 |
| A_43_P16463   | <u>NM_001014274</u> | Rattus norvegicus similar to armadillo repeat protein ALEX2 (LOC367903)_ mRNA [NM_001014274]                                                    | -0.3  | 0.00370 |
| A_44_P919314  | <u>TC549528</u>     | Unknown                                                                                                                                         | -0.3  | 0.00477 |
| A_43_P11890   | <u>HMGCS1</u>       | Rattus norvegicus 3-hydroxy-3-methylglutaryl-Coenzyme A synthase 1 (Hmgcs1)_ mRNA [NM_017268]                                                   | -0.31 | 0.00001 |
| A_44_P1008163 | <u>NM_001039030</u> | Rattus norvegicus growth arrest specific 8 (Gas8)_ mRNA [NM_001039030]                                                                          | -0.31 | 0.00008 |
| A_42_P659321  | <u>BF551389</u>     | BF551389 UI-R-C0-ip-a-08-0-UI.r1 UI-R-C0 Rattus norvegicus cDNA clone UI-R-C0-ip-a-08-0-UI 5'_ mRNA sequence [BF551389]                         | -0.31 | 0.00010 |
| A_44_P886652  | <u>TC532501</u>     | Q6YUI4 (Q6YUI4) Auxin-induced protein-like_partial (6%) [TC532501]                                                                              | -0.31 | 0.00022 |
| A_44_P168285  | <u>CYP51</u>        | Rattus norvegicus cytochrome P450_subfamily 51 (Cyp51)_ mRNA [NM_012941]                                                                        | -0.31 | 0.00041 |
| A_44_P533778  | <u>LUZP1</u>        | Rattus norvegicus leucine zipper protein 1 (Luzp1)_ mRNA [NM_030830]                                                                            | -0.31 | 0.00042 |
| A_44_P212033  | <u>BI300426</u>     | BI300426 UI-R-CV2-cie-g-11-0-UI.s1 UI-R-CV2 Rattus norvegicus cDNA clone UI-R-CV2-cie-g-11-0-UI 3'_ mRNA sequence [BI300426]                    | -0.31 | 0.00044 |
| A_44_P1047567 | <u>RGD1307395</u>   | Rattus norvegicus similar to SR rich protein (LOC297942)_ mRNA [XM_238393]                                                                      | -0.31 | 0.00093 |
| A_44_P1041880 | <u>BC103480</u>     | Rattus norvegicus breast carcinoma amplified sequence 1_ mRNA (cDNA clone IMAGE:7939378)_ partial cds [BC103480]                                | -0.31 | 0.00110 |
| A_44_P414565  | <u>GABRA5</u>       | Rattus norvegicus gamma-aminobutyric acid A receptor_alpha 5 (Gabra5)_ mRNA [NM_017295]                                                         | -0.31 | 0.00154 |
| A_44_P1022868 | <u>AB033713</u>     | Rattus norvegicus mitochondrial gene for cytochrome b_partial cds [AB033713]                                                                    | -0.31 | 0.00159 |
| A_44_P777990  | <u>TC543764</u>     | Unknown                                                                                                                                         | -0.31 | 0.00162 |
| A_44_P130044  | <u>AW143538</u>     | AW143538 EST293743 Normalized rat brain_Bento Soares Rattus sp. cDNA clone RGIBP85 5'_ end_ mRNA sequence [AW143538]                            | -0.32 | 0.00000 |
| A_44_P137633  | <u>ADORA1</u>       | Rattus norvegicus adenosine A1 receptor (Adora1)_ mRNA [NM_017155]                                                                              | -0.32 | 0.00003 |
| A_44_P480379  | <u>RGD1564165</u>   | Rattus norvegicus similar to hypothetical protein (LOC305628)_ mRNA [XM_223734]                                                                 | -0.32 | 0.00028 |
| A_44_P336786  | <u>AW522740</u>     | AW522740 UI-R-BO0-ahl-h-01-0-UI.s1 UI-R-BO0 Rattus norvegicus cDNA clone UI-R-BO0-ahl-h-01-0-UI 3'_ mRNA sequence [AW522740]                    | -0.32 | 0.00030 |
| A_43_P13109   | <u>CYP26A1</u>      | Rattus norvegicus cytochrome P450_family 26_subfamily A_polypeptide 1 (Cyp26a1)_ mRNA [NM_130408]                                               | -0.32 | 0.00034 |
| A_44_P700667  | <u>TC559808</u>     | Unknown                                                                                                                                         | -0.32 | 0.00056 |
| A_44_P148383  | <u>AW915853</u>     | AW915853 EST347157 Rat gene index_normalized rat_norvegicus_Bento Soares Rattus norvegicus cDNA clone RGIDB53 5'_ end_ mRNA sequence [AW915853] | -0.32 | 0.00102 |
| A_44_P365879  | <u>RGD1308697</u>   | Rattus norvegicus similar to hypothetical protein FLJ10579 (LOC311328)_ mRNA [XM_230467]                                                        | -0.32 | 0.00159 |

|               |                 |                                                                                                                                                                                |       |         |
|---------------|-----------------|--------------------------------------------------------------------------------------------------------------------------------------------------------------------------------|-------|---------|
| A 44_P492624  | TRIP3           | Rattus norvegicus similar to thyroid hormone receptor interactor 3; thyroid receptor interacting protein 3; zinc finger_HIT domain containing 3 (LOC360586)_ mRNA [XM_340867]  | -0.32 | 0.00183 |
| A 44_P394725  | CDH8            | Rattus rattus rCdh8-a1 mRNA for cadherin-8_ complete cds [AB010437]                                                                                                            | -0.32 | 0.00288 |
| A 44_P961724  | TC526460        | Q955H6 (Q955H6) Cytochrome b (Fragment)_ partial (8%) [TC526460]                                                                                                               | -0.32 | 0.00294 |
| A 43_P10223   | CB579054        | CB579054 AMGNNUC:NRDG1-00129-D9-A nrdg1 (10855) Rattus norvegicus cDNA clone nrdg1-00129-d9 5'_ mRNA sequence [CB579054]                                                       | -0.32 | 0.00374 |
| A 44_P473603  | A 44_P473603    | Unknown                                                                                                                                                                        | -0.33 | 0.00011 |
| A 44_P323053  | AI556317        | AI556317 UI-R-C2p-rk-h-04-0-UI.s1 UI-R-C2p Rattus norvegicus cDNA clone UI-R-C2p-rk-h-04-0-UI 3'_ mRNA sequence [AI556317]                                                     | -0.33 | 0.00039 |
| A 44_P1011664 | CATNAL1         | Rattus norvegicus similar to alpha-catenin related protein (LOC298019)_ mRNA [XM_216386]                                                                                       | -0.33 | 0.00058 |
| A 44_P655502  | TC567885        | Unknown                                                                                                                                                                        | -0.33 | 0.00168 |
| A 44_P330318  | CDKL2           | Rattus norvegicus cyclin-dependent kinase-like 2 (CDC2-related kinase) (Cdkl2)_ mRNA [NM_001012035]                                                                            | -0.33 | 0.00183 |
| A 44_P162099  | GLRB            | Rattus norvegicus glycine receptor_ beta subunit (Glrb)_ mRNA [NM_053296]                                                                                                      | -0.33 | 0.00377 |
| A 44_P914357  | TC553622        | Unknown                                                                                                                                                                        | -0.34 | 0.00003 |
| A 44_P996369  | AW917667        | AW917667 EST348971 Rat gene index_ normalized rat_ norvegicus_ Bento Soares Rattus norvegicus cDNA clone RGIEG61 5'_ end_ mRNA sequence [AW917667]                             | -0.34 | 0.00009 |
| A 44_P680974  | CO387403        | AGENCOURT_26625375 NIH_MGC_253 Rattus norvegicus cDNA clone IMAGE:7304252 5'_ mRNA sequence [CO387403]                                                                         | -0.34 | 0.00065 |
| A 44_P669601  | TC524990        | Unknown                                                                                                                                                                        | -0.34 | 0.00118 |
| A 44_P1009594 | NM_001024232    | Rattus norvegicus cytochrome P450_ subfamily 3A_ polypeptide 62 (Cyp3a62)_ mRNA [NM_001024232]                                                                                 | -0.34 | 0.00233 |
| A 44_P440663  | PRDM7           | PREDICTED: Rattus norvegicus PR domain containing 7 (predicted) (Prdm7_predicted)_ mRNA [XM_344847]                                                                            | -0.34 | 0.00397 |
| A 44_P395915  | GLRA2           | Rattus norvegicus glycine receptor_ alpha 2 subunit (Glr2)_ mRNA [NM_012568]                                                                                                   | -0.34 | 0.00500 |
| A 42_P567568  | DV727788        | RVL20343 Wackym-Soares normalized rat vestibular cDNA library Rattus norvegicus cDNA 5'_ mRNA sequence [DV727788]                                                              | -0.35 | 0.00000 |
| A 44_P538604  | XM_226227       | Rattus norvegicus similar to cadherin-8 (LOC307631)_ mRNA [XM_226227]                                                                                                          | -0.35 | 0.00002 |
| A 44_P365580  | SQLE            | Rattus norvegicus squalene epoxidase (Sqle)_ mRNA [NM_017136]                                                                                                                  | -0.35 | 0.00004 |
| A 43_P10996   | ATP1B2          | Rattus norvegicus ATPase_ Na+/K+ transporting_ beta 2 polypeptide (Atp1b2)_ mRNA [NM_012507]                                                                                   | -0.35 | 0.00012 |
| A 44_P854908  | CB583330        | AMGNNUC:NRHY5-00351-C1-A W Rat hypothalamus (10471) Rattus norvegicus cDNA clone nrhy5-00351-c1 5'_ mRNA sequence [CB583330]                                                   | -0.35 | 0.00123 |
| A 44_P550992  | RGD1310117      | PREDICTED: Rattus norvegicus hypothetical LOC298591 (predicted) (LOC298591)_ mRNA [XM_216568]                                                                                  | -0.35 | 0.00173 |
| A 44_P702019  | TC549650        | Unknown                                                                                                                                                                        | -0.35 | 0.00214 |
| A 44_P137187  | AB033713        | Rattus norvegicus mitochondrial gene for cytochrome b_ partial cds [AB033713]                                                                                                  | -0.35 | 0.00287 |
| A 43_P14618   | TC555070        | Unknown                                                                                                                                                                        | -0.35 | 0.00289 |
| A 44_P640239  | TC531760        | Q8HL99 (Q8HL99) Cytochrome c oxidase subunit III_ partial (5%) [TC531760]                                                                                                      | -0.35 | 0.00443 |
| A 44_P491393  | NUDT7           | PREDICTED: Rattus norvegicus nudix (nucleoside diphosphate linked moiety X)-type motif 7 (predicted) (Nudt7_predicted)_ mRNA [XM_341693]                                       | -0.36 | 0.00023 |
| A 44_P114338  | RGD1308593      | PREDICTED: Rattus norvegicus similar to RIKEN cDNA 1700073K01 (predicted) (LOC289280)_ mRNA [XM_213950]                                                                        | -0.36 | 0.00080 |
| A 44_P325189  | DSCR1L1         | Rattus norvegicus Down syndrome critical region gene 1-like 1 (Dscr1l1)_ mRNA [NM_175578]                                                                                      | -0.36 | 0.00108 |
| A 44_P535899  | ENSRNOT00000004 | BF289485 EST454076 Rat Gene Index_ normalized rat_ Rattus norvegicus cDNA Rattus norvegicus cDNA clone RGIHH80_ mRNA sequence [BF289485]                                       | -0.36 | 0.00140 |
| A 44_P796146  | TC531316        | Unknown                                                                                                                                                                        | -0.36 | 0.00385 |
| A 44_P445318  | RAPGEF4         | PREDICTED: Rattus norvegicus cAMP-regulated guanine nucleotide exchange factor II (Rapgef4)_ mRNA [XM_215985]                                                                  | -0.37 | 0.00242 |
| A 44_P560021  | ENSRNOT00000000 | Q8BH19 (Q8BH19) Mus musculus 16 days neonate cerebellum cDNA_RIKEN full-length enriched library_ clone:9630039A18 product:UDP-Gal:betaGlcNAc beta 1_3-galactosyltransferase_ p | -0.37 | 0.00257 |
| A 43_P14910   | DDC             | Rattus norvegicus dopa decarboxylase (Ddc)_ mRNA [NM_012545]                                                                                                                   | -0.37 | 0.00275 |
| A 44_P946394  | TC525395        | Unknown                                                                                                                                                                        | -0.38 | 0.00001 |
| A 44_P118724  | ARC             | Rattus norvegicus activity regulated cytoskeletal-associated protein (Arc)_ mRNA [NM_019361]                                                                                   | -0.38 | 0.00009 |
| A 44_P610320  | RAB2B           | Rattus norvegicus RAB2B_ member RAS oncogene family_ mRNA (cDNA clone IMAGE:7316063)_ partial cds [BC092636]                                                                   | -0.38 | 0.00095 |
| A 44_P256188  | BF564716        | BF564716 UI-R-BU0-amw-e-05-0-UI.r1 UI-R-BU0 Rattus norvegicus cDNA clone UI-R-BU0-amw-e-05-0-UI 5'_ mRNA sequence [BF564716]                                                   | -0.39 | 0.00021 |
| A 44_P899288  | TC538431        | Unknown                                                                                                                                                                        | -0.39 | 0.00022 |
| A 44_P906929  | DV722904        | RVL14577 Wackym-Soares normalized rat vestibular cDNA library Rattus norvegicus cDNA 5'_ mRNA sequence [DV722904]                                                              | -0.39 | 0.00048 |
| A 43_P11861   | DIO3            | Rattus norvegicus deiodinase_ iodothyronine_ type III (Dio3)_ mRNA [NM_017210]                                                                                                 | -0.39 | 0.00255 |
| A 44_P414273  | COX8H           | Rattus norvegicus Cytochrom c oxidase subunit VIII-H (heart/muscle) (Cox8h)_ mRNA [NM_012786]                                                                                  | -0.39 | 0.00405 |

|              |                              |                                                                                                                                       |       |         |
|--------------|------------------------------|---------------------------------------------------------------------------------------------------------------------------------------|-------|---------|
| A_44_P222761 | <a href="#">RGD1309931</a>   | PREDICTED: Rattus norvegicus similar to hypothetical protein (predicted) (LOC362538)_mRNA [XM_342856]                                 | -0.4  | 0.00000 |
| A_43_P10631  | <a href="#">AW142959</a>     | AW142959 EST293251 Normalized rat kidney_Bento Soares Rattus sp. cDNA clone RGIBA46 5' end_mRNA sequence [AW142959]                   | -0.4  | 0.00000 |
| A_43_P12207  | <a href="#">DDAH1</a>        | Rattus norvegicus dimethylarginine dimethylaminohydrolase 1 (Ddah1)_mRNA [NM_022297]                                                  | -0.4  | 0.00013 |
| A_44_P341895 | <a href="#">GPR103</a>       | Rattus norvegicus G protein-coupled receptor 103 (Gpr103)_mRNA [NM_198199]                                                            | -0.41 | 0.00005 |
| A_44_P380835 | <a href="#">HOMER1</a>       | RNU92079 Rattus norvegicus GLGF-domain protein Homer (homer) mRNA_complete cds [U92079]                                               | -0.41 | 0.00203 |
| A_42_P674843 | <a href="#">SCN4B</a>        | Rattus norvegicus sodium channel_voltage-gated_type IV_beta (Scn4b)_mRNA [NM_001008880]                                               | -0.41 | 0.00443 |
| A_42_P707872 | <a href="#">STK39</a>        | Rattus norvegicus serine/threonine kinase 39_STE20/SPS1 homolog (yeast) (Stk39)_mRNA [NM_019362]                                      | -0.42 | 0.00015 |
| A_44_P747071 | <a href="#">TC560446</a>     | Unknown                                                                                                                               | -0.43 | 0.00328 |
| A_44_P365286 | <a href="#">ALDH1A1</a>      | Rattus norvegicus aldehyde dehydrogenase family 1_member A1 (Aldh1a1)_mRNA [NM_022407]                                                | -0.44 | 0.00001 |
| A_44_P156197 | <a href="#">USH3A</a>        | Rattus norvegicus Usher syndrome 3A homolog (human) (Ush3a)_mRNA [NM_153299]                                                          | -0.44 | 0.00038 |
| A_42_P665879 | <a href="#">ATF5</a>         | Rattus norvegicus activating transcription factor 5 (Atf5)_mRNA [NM_172336]                                                           | -0.44 | 0.00081 |
| A_44_P751708 | <a href="#">A_44_P751708</a> | Unknown                                                                                                                               | -0.45 | 0.00000 |
| A_44_P773533 | <a href="#">CO386419</a>     | AGENCOURT_26620935 NIH_MGC_253 Rattus norvegicus cDNA clone IMAGE:7303279 5'_mRNA sequence [CO386419]                                 | -0.45 | 0.00011 |
| A_44_P950925 | <a href="#">A_44_P950925</a> | Unknown                                                                                                                               | -0.46 | 0.00127 |
| A_43_P11601  | <a href="#">SOD3</a>         | Rattus norvegicus superoxide dismutase 3_extracellular (Sod3)_mRNA [NM_012880]                                                        | -0.47 | 0.00002 |
| A_44_P743669 | <a href="#">DV716578</a>     | RVL6945 Wackym-Soares normalized rat vestibular cDNA library Rattus norvegicus cDNA 5'_mRNA sequence [DV716578]                       | -0.48 | 0.00002 |
| A_44_P702082 | <a href="#">TC546713</a>     | Unknown                                                                                                                               | -0.49 | 0.00013 |
| A_44_P233786 | <a href="#">VGF</a>          | Rattus norvegicus VGF nerve growth factor inducible (Vgf)_mRNA [NM_030997]                                                            | -0.5  | 0.00025 |
| A_44_P217049 | <a href="#">BF289650</a>     | BF289650 EST454241 Rat Gene Index_normalized rat_Rattus norvegicus cDNA Rattus norvegicus cDNA clone RGIHJ43_mRNA sequence [BF289650] | -0.52 | 0.00340 |
| A_44_P535284 | <a href="#">BHMT</a>         | Rattus norvegicus betaine-homocysteine methyltransferase (Bhmt)_mRNA [NM_030850]                                                      | -0.59 | 0.00002 |
| A_44_P345298 | <a href="#">CORT</a>         | Rattus norvegicus cortistatin (Cort)_mRNA [NM_012835]                                                                                 | -0.6  | 0.00041 |
| A_42_P693964 | <a href="#">CYP26B1</a>      | Rattus norvegicus cytochrome P450_family 26_subfamily b_polypeptide 1 (Cyp26b1)_mRNA [NM_181087]                                      | -0.81 | 0.00000 |
| A_44_P548949 | <a href="#">AA900283</a>     | AA900283 UI-R-E0-dd-a-05-0-UI.s1 UI-R-E0 Rattus norvegicus cDNA clone UI-R-E0-dd-a-05-0-UI 3' similar to gi [AA900283]                | -0.89 | 0.00127 |
| A_44_P515798 | <a href="#">RGD1308977</a>   | PREDICTED: Rattus norvegicus similar to RIKEN cDNA 1110017116 (predicted) (LOC291312)_mRNA [XM_214510]                                | -0.98 | 0.00004 |
|              |                              |                                                                                                                                       |       |         |
